# Supplementary material for: SDG102, a H3K36-Methyltransferase-Encoding Gene, Plays Pleiotropic Roles in Growth and Development of Maize (Zea mays L.)
Source: MDPI journal article supplement (doi:10.3390/ijms23137458), 2022-07-05
Supplement: s1 [file s1]

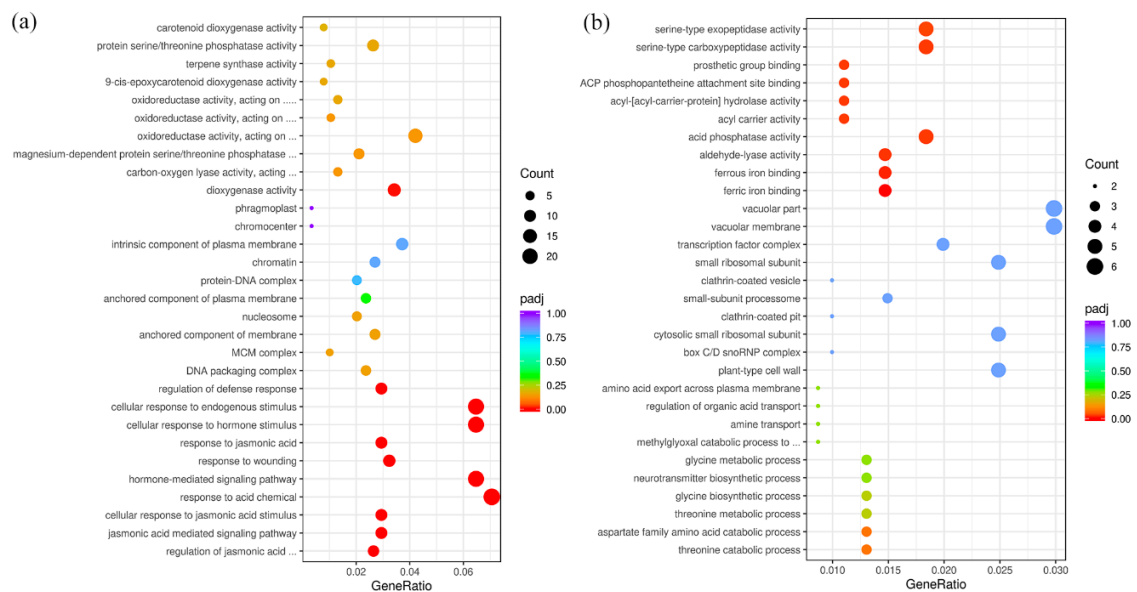

**Figure S2** Differentially expressed genes (DEGs) GO enrichment analysis of AS1 and OE3.

(a) Downregulated DEGs GO of AS1. (b) Upregulated DEGs GO of OE3. Adjusted P-value (padj) for each ontology term are displayed with a color reflecting its level of significance.

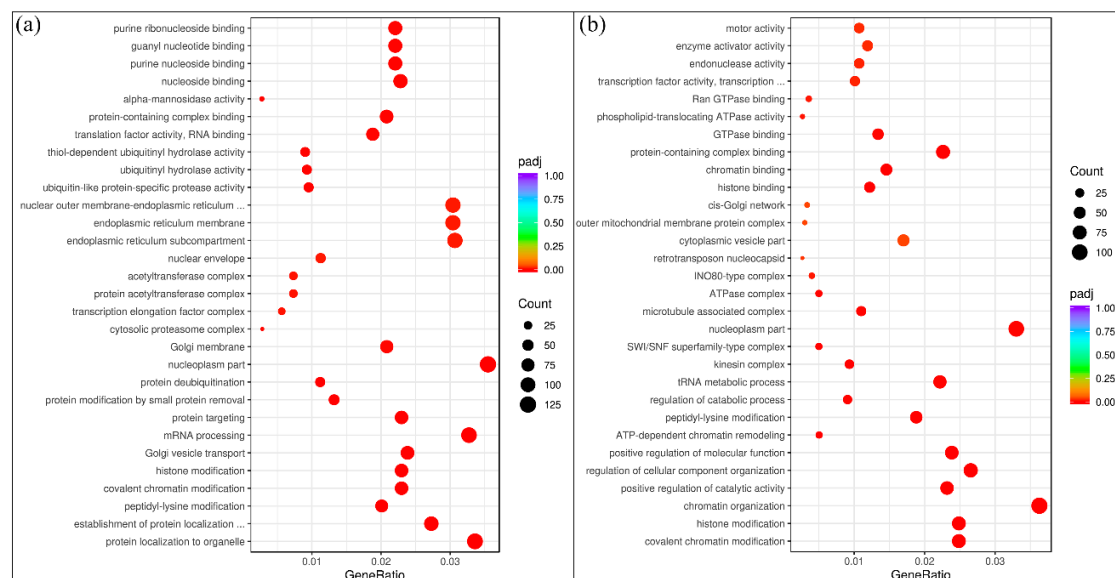

**Figure S3** Significant GO terms on genes with downregulated H3K36me3 in AS1 (a) and upregulated H3K36me3 in OE3 (b). Adjusted P-value (padj) for each ontology term are displayed with a color reflecting its level of significance.

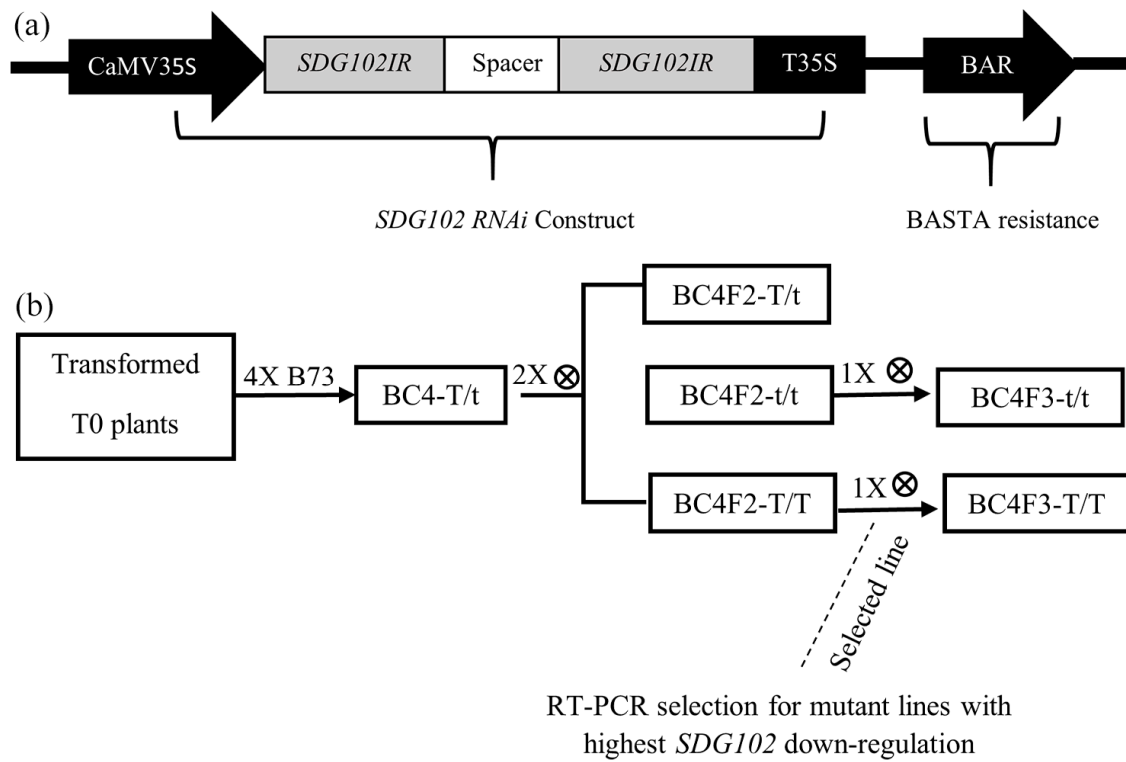

**Figure S4** Schematic diagram of vector construction of *SDG102-RNAi* (a) and crossing scheme for *SDG102* down-regulation lines (b).

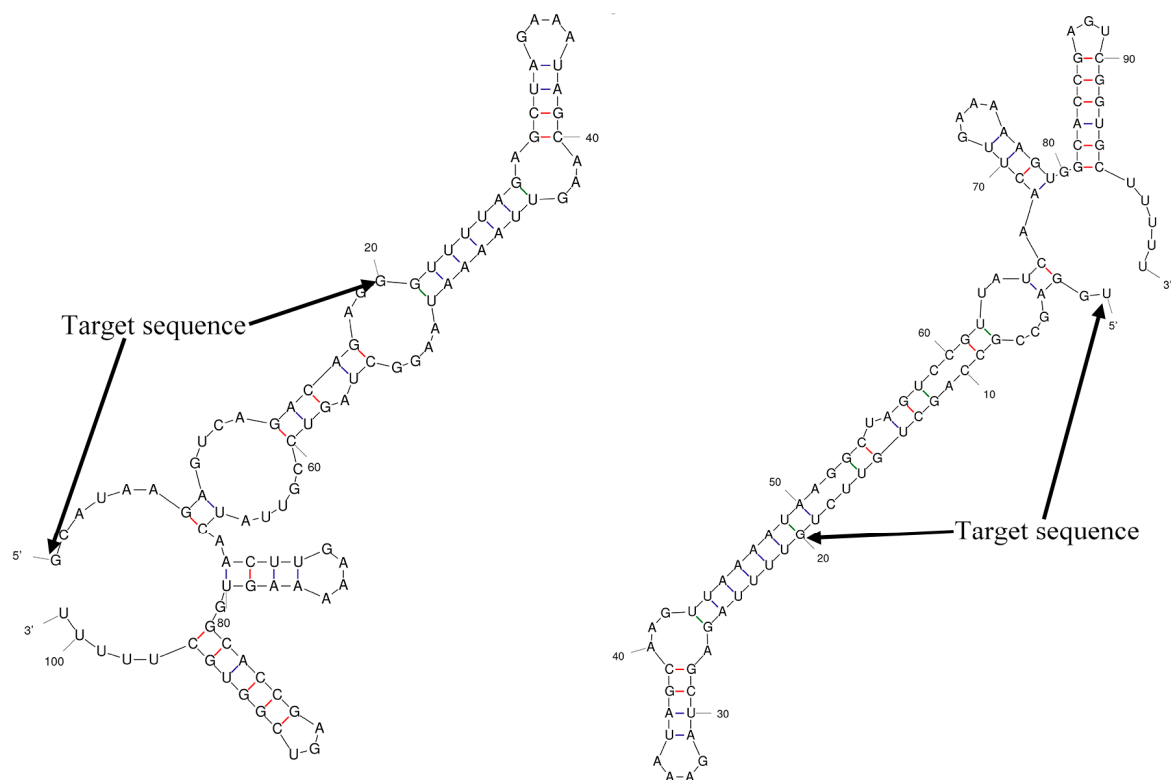

**Figure S5** The secondary structures of target-sgRNAs targeting the third exon (left) and the seventh exon (right)

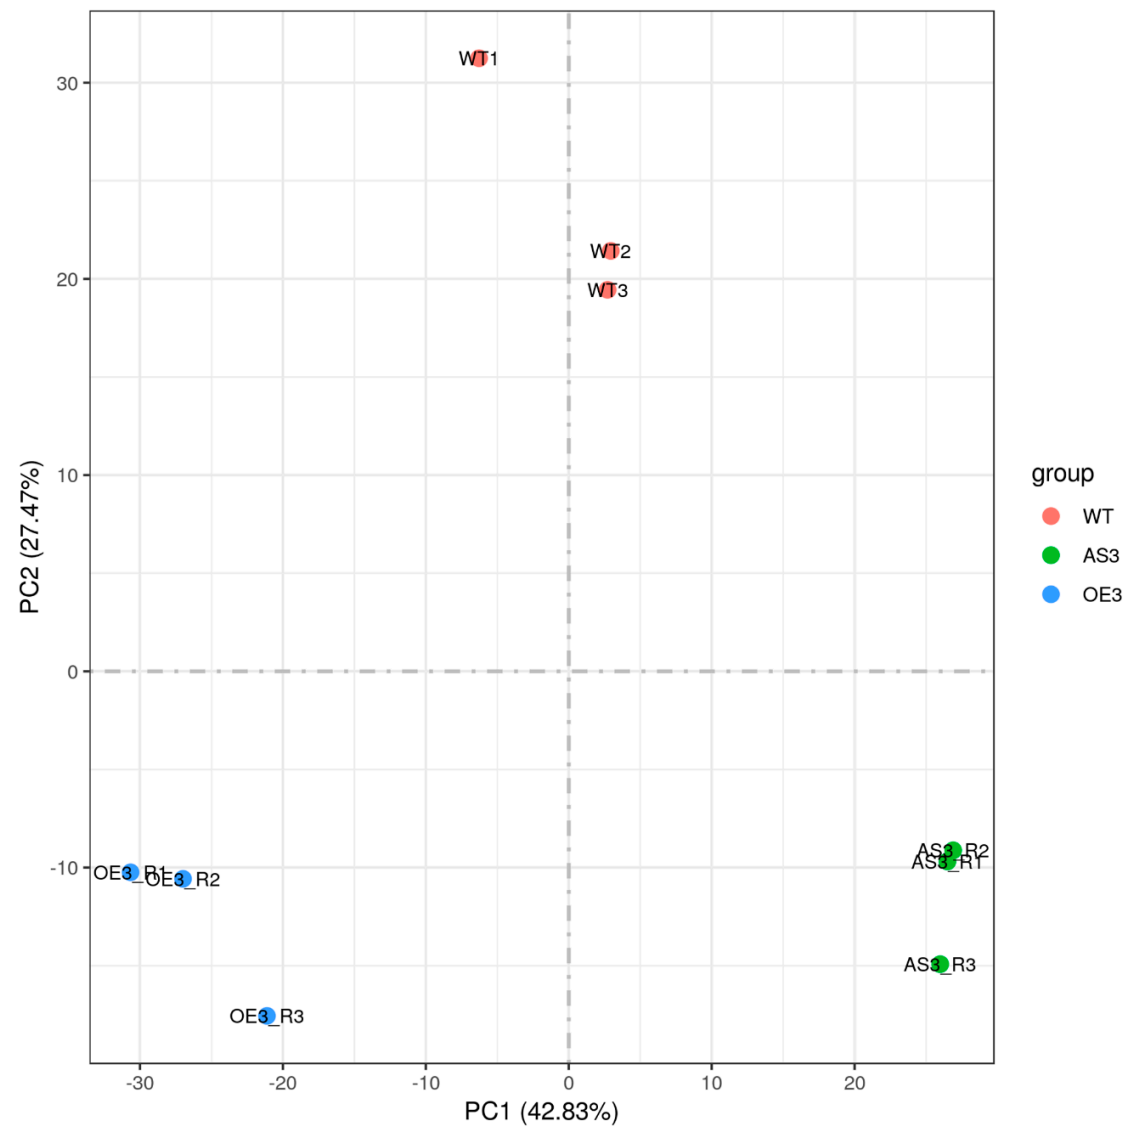

**Figure S6** PCA of RNA-Seq data quality. PCA = principal component analysis
