# Supplementary material for: SDG102, a H3K36-Methyltransferase-Encoding Gene, Plays Pleiotropic Roles in Growth and Development of Maize (Zea mays L.)
Source: Int J Mol Sci. 2022 Jul 5;23(13):7458. doi: 10.3390/ijms23137458 (PMC9267571; doi:10.3390/ijms23137458)
Supplement: Supplementary file 1 [file ijms-23-07458-s001.zip]

Archive with 6 entries (6 files):
- Figures S1-S6.pdf
- Table S1 Primers used in this study.xlsx
- Table S2 The list of DEGs.xlsx
- Table S3 Significant GO on DEGs with fold change 2 and FDR 0.05.xlsx
- Table S4 Gene list with significant changed H3K36me3.xlsx
- Table S5 GO terms on genes with significant changed H3K36me3.xlsx
