# Supplementary material for: SDG102, a H3K36-Methyltransferase-Encoding Gene, Plays Pleiotropic Roles in Growth and Development of Maize (Zea mays L.)
Source: Int J Mol Sci. 2022 Jul 5;23(13):7458. doi: 10.3390/ijms23137458 (PMC9267571; doi:10.3390/ijms23137458)
Supplement: Supplementary file 1 [file ijms-23-07458-s001.zip › Table S1 Primers used in this study.xlsx]

## Sheet: Sheet1
Table S1 Primers Used in this Paper
Name	Sequence (5'-3')	Gene name
Primers for plasmid contruction of SDG102 RNAi
SDG102RNAi-F	ATACAGCAACATCAGCAGAGTACAG	35S::SDG102RNAi
SDG102RNAi-R	ACTTCAACCCGTTCTGCTCTCT
Primers for gRNA synthesis
SDG102-3-F	GGCGCATAAGAGTCAGACAGAGG	CRISPER/Cas9-sgRNA
SDG102-3-R	AAACCCTCTGTCTGACTCTTATG
SDG102-7-F	GGCGTGGAGCCGCCAGCTGTTCT	CRISPER/Cas9-sgRNA
SDG102-7-R	AAACAGAACAGCTGGCGGCTCCA-
Primers for mutation detection
SDG102-3-166-F	TTGACAGCAACGCTTTCTCCTAC
SDG102-3-672-R	GGACCAATTTCGCCCTATCC
SDG102-7-4158-F	TGGTAAGTTTGTATTAAAGGCACAG
SDG102-7-4846-R	CATCATCATCTTCCCACAGG
Pimers for overexpression vector of SDG102
Forward	actcttgaccatggtagatctATGCTAATGGAGGAAGAATGCG	35S::SDG102
Reverse	ggggaaattcgagctggtcaccTCATGAGCCGTTCTCCAGGT
Pimers for Bar
Forward	GCACCATCCGTCAACCACTACATC	433bp
Reverse	AGCTGCCAGAAACCCACGT
Primer in gateway (add attB1 and attB2) for RNAi
Forward	GGGGACAAGTTTGTACAAAAAAGCAGGCTCCATACAGCAACATCAGCAGAGTACAG	SDG102:RNAi
Reverse	GGGGACCACTTTGTACAAGAAAGCTGGGTAACTTCAACCCGTTCTGCTCTCT
Primers for RT-qPCR of ACT1
ACT1-F1	-CCTGAAGATCACCCTGTGCT
ACT1-R1	-GCAGTCTCCAGCTCCTGTTC
Primers for RT-PCR of SDG102
q102-45-F	CATTGACAGCAACGCTTTCTCCT	SDG102
q102-290-R	CATCCACGCCCTCCAGTTCT
Primers for RT-PCR of ZCN8
Forward Primer	GGCTCGTGTCATACAGGATGT
Reverse Primer	GCTTTAGCTCAGCACTTGGC
Primers for RT-PCR of ZCN7 & ZCN8
Forward Primer	AAGTCCAAGCCATCCATC
Reverse Primer	CACTGGCAATGCTGAGGT
Primers for RT-PCR of MADS67 (ZMM28)
Forward Primer	CTCTAGCCATTCCAGCAT
Reverse Primer	TTTAACCGGACATATTCATC
Primers for RT-PCR of MADS4 (ZMM4)
Forward Primer	CTCCACCAAGGGCAAGCT
Reverse Primer	TCTGCGGAAATGAGAACC
Primers for ChIP-qPCR
ZCN7 A region	F ATGCAACAAAGAGAGCACAAAA R TACCTTAGTGTTTGTTCTTCCGC
ZCN7 B region	F GTTAAAAAAATCATGCTTTGACAAAG R TGTAGGACACGAGCCATAACC
ZCN7 C region	F GCAATTTACAGATAATGCTACCCGA R CTGCACCAATTCAGTGGTCAAC
ZCN7 D region	F TTTAATTGGTTGGCAACATCAG R TGTGGGGACATCGACATTTATT
ZCN7 E region	F GAACAGGATTCAGCGAGCA R GCTCTTTGGCACATACGC
ZCN8 A region	F CTCCAGCCATTCCTTCGGT R CATACTCAGTGCATGTTCTTCCAA
ZCN8 B region	F GCAACGGCCAATACCATTAG R TAGCTCAGCACTTGGCAGA
ZCN8 C region	F TGACATGAGGGCTTTCTACACC R CTACAACCTAAGCTCCACAGATAC
ZCN8 D region	F TGGTTGGTAACCTTGAGGTGTC R CAAGGAGCACTGAAGTATGTGG
ZCN8 E region	F CGCTCCCACCTCCTAACAAA R CGGCGTCCAACCTTACACA
