# Supplementary material for: SDG102, a H3K36-Methyltransferase-Encoding Gene, Plays Pleiotropic Roles in Growth and Development of Maize (Zea mays L.)
Source: Int J Mol Sci. 2022 Jul 5;23(13):7458. doi: 10.3390/ijms23137458 (PMC9267571; doi:10.3390/ijms23137458)
Supplement: Supplementary file 1 [file ijms-23-07458-s001.zip › Table S2 The list of DEGs.xlsx]

## Sheet: AS1_DEGs
AS1_UP_2_Times		AS1_DOWN_2_Times
Zm00001d053960		Zm00001d054096
Zm00001d053534		Zm00001d053995
Zm00001d052989		Zm00001d053746
Zm00001d052877		Zm00001d053702
Zm00001d052615		Zm00001d053696
Zm00001d052532		Zm00001d053236
Zm00001d052211		Zm00001d053213
Zm00001d051932		Zm00001d053181
Zm00001d051915		Zm00001d053117
Zm00001d051810		Zm00001d052981
Zm00001d051174		Zm00001d052962
Zm00001d050346		Zm00001d052827
Zm00001d050164		Zm00001d052777
Zm00001d049629		Zm00001d052640
Zm00001d049585		Zm00001d052372
Zm00001d049556		Zm00001d052371
Zm00001d049446		Zm00001d052318
Zm00001d049286		Zm00001d052252
Zm00001d049219		Zm00001d052213
Zm00001d049217		Zm00001d052192
Zm00001d049178		Zm00001d052167
Zm00001d048949		Zm00001d052041
Zm00001d048948		Zm00001d051908
Zm00001d048719		Zm00001d051788
Zm00001d048625		Zm00001d051653
Zm00001d048444		Zm00001d051496
Zm00001d048305		Zm00001d051468
Zm00001d047839		Zm00001d051460
Zm00001d047831		Zm00001d051420
Zm00001d047705		Zm00001d051361
Zm00001d047695		Zm00001d051314
Zm00001d047688		Zm00001d051302
Zm00001d047201		Zm00001d051239
Zm00001d046834		Zm00001d051235
Zm00001d046801		Zm00001d051194
Zm00001d046460		Zm00001d051130
Zm00001d046374		Zm00001d051128
Zm00001d046318		Zm00001d051080
Zm00001d046236		Zm00001d050988
Zm00001d046234		Zm00001d050514
Zm00001d046132		Zm00001d050475
Zm00001d045905		Zm00001d050371
Zm00001d045843		Zm00001d050308
Zm00001d045839		Zm00001d050241
Zm00001d045838		Zm00001d049926
Zm00001d045746		Zm00001d049505
Zm00001d045360		Zm00001d049364
Zm00001d045295		Zm00001d049244
Zm00001d045091		Zm00001d049241
Zm00001d044986		Zm00001d049161
Zm00001d044409		Zm00001d049111
Zm00001d044399		Zm00001d049061
Zm00001d044043		Zm00001d048991
Zm00001d044018		Zm00001d048969
Zm00001d043988		Zm00001d048726
Zm00001d043870		Zm00001d048669
Zm00001d043762		Zm00001d048662
Zm00001d043705		Zm00001d048661
Zm00001d043650		Zm00001d048639
Zm00001d043622		Zm00001d048637
Zm00001d043512		Zm00001d048636
Zm00001d043505		Zm00001d048635
Zm00001d043344		Zm00001d048634
Zm00001d043286		Zm00001d048612
Zm00001d043283		Zm00001d048606
Zm00001d043257		Zm00001d048592
Zm00001d042739		Zm00001d048568
Zm00001d042706		Zm00001d048469
Zm00001d042684		Zm00001d048440
Zm00001d042472		Zm00001d048309
Zm00001d042307		Zm00001d048294
Zm00001d042244		Zm00001d048268
Zm00001d042143		Zm00001d048263
Zm00001d042134		Zm00001d048226
Zm00001d042088		Zm00001d048208
Zm00001d041972		Zm00001d048192
Zm00001d041777		Zm00001d048178
Zm00001d041772		Zm00001d048021
Zm00001d041768		Zm00001d047944
Zm00001d041624		Zm00001d047883
Zm00001d041258		Zm00001d047841
Zm00001d041082		Zm00001d047840
Zm00001d041025		Zm00001d047821
Zm00001d040836		Zm00001d047820
Zm00001d040705		Zm00001d047806
Zm00001d040245		Zm00001d047799
Zm00001d040094		Zm00001d047787
Zm00001d039924		Zm00001d047779
Zm00001d039907		Zm00001d047750
Zm00001d039049		Zm00001d047744
Zm00001d038950		Zm00001d047736
Zm00001d038642		Zm00001d047732
Zm00001d038456		Zm00001d047716
Zm00001d038453		Zm00001d047708
Zm00001d038451		Zm00001d047680
Zm00001d037998		Zm00001d047662
Zm00001d037951		Zm00001d047584
Zm00001d037935		Zm00001d047495
Zm00001d037694		Zm00001d047478
Zm00001d037653		Zm00001d047446
Zm00001d036965		Zm00001d047345
Zm00001d036763		Zm00001d047276
Zm00001d036715		Zm00001d047170
Zm00001d035646		Zm00001d046966
Zm00001d035450		Zm00001d046922
Zm00001d035428		Zm00001d046865
Zm00001d035294		Zm00001d046668
Zm00001d035246		Zm00001d046530
Zm00001d035195		Zm00001d046422
Zm00001d035125		Zm00001d046261
Zm00001d035089		Zm00001d045460
Zm00001d034989		Zm00001d045459
Zm00001d034514		Zm00001d045026
Zm00001d034248		Zm00001d044875
Zm00001d034104		Zm00001d044783
Zm00001d034095		Zm00001d044769
Zm00001d034092		Zm00001d044752
Zm00001d034027		Zm00001d044723
Zm00001d033909		Zm00001d044622
Zm00001d033455		Zm00001d044540
Zm00001d033320		Zm00001d044529
Zm00001d033241		Zm00001d044526
Zm00001d032947		Zm00001d044508
Zm00001d032946		Zm00001d044426
Zm00001d032510		Zm00001d044387
Zm00001d032467		Zm00001d044176
Zm00001d032425		Zm00001d044100
Zm00001d032368		Zm00001d044048
Zm00001d032240		Zm00001d043877
Zm00001d032103		Zm00001d043795
Zm00001d031873		Zm00001d043741
Zm00001d031848		Zm00001d043740
Zm00001d031407		Zm00001d043706
Zm00001d030981		Zm00001d043701
Zm00001d030676		Zm00001d043461
Zm00001d030555		Zm00001d043374
Zm00001d030172		Zm00001d043318
Zm00001d030105		Zm00001d043263
Zm00001d030102		Zm00001d043235
Zm00001d029829		Zm00001d043205
Zm00001d029807		Zm00001d043156
Zm00001d029776		Zm00001d043084
Zm00001d029696		Zm00001d043062
Zm00001d029320		Zm00001d043060
Zm00001d029319		Zm00001d042926
Zm00001d029247		Zm00001d042904
Zm00001d029216		Zm00001d042886
Zm00001d028693		Zm00001d042867
Zm00001d028651		Zm00001d042738
Zm00001d028572		Zm00001d042714
Zm00001d027996		Zm00001d042572
Zm00001d027946		Zm00001d042461
Zm00001d027908		Zm00001d042460
Zm00001d027590		Zm00001d042217
Zm00001d027537		Zm00001d042214
Zm00001d027175		Zm00001d042175
Zm00001d026505		Zm00001d042169
Zm00001d026488		Zm00001d042123
Zm00001d026141		Zm00001d042114
Zm00001d026042		Zm00001d042056
Zm00001d025980		Zm00001d042016
Zm00001d025706		Zm00001d041965
Zm00001d025704		Zm00001d041922
Zm00001d025699		Zm00001d041853
Zm00001d025696		Zm00001d041418
Zm00001d025695		Zm00001d041387
Zm00001d025670		Zm00001d041353
Zm00001d025645		Zm00001d041333
Zm00001d025629		Zm00001d041298
Zm00001d025628		Zm00001d040979
Zm00001d025607		Zm00001d040787
Zm00001d025593		Zm00001d040526
Zm00001d025571		Zm00001d040382
Zm00001d025557		Zm00001d040213
Zm00001d025554		Zm00001d040148
Zm00001d025480		Zm00001d040048
Zm00001d025437		Zm00001d039944
Zm00001d025420		Zm00001d039935
Zm00001d025402		Zm00001d039919
Zm00001d025389		Zm00001d039859
Zm00001d025367		Zm00001d039790
Zm00001d025333		Zm00001d039618
Zm00001d025281		Zm00001d039615
Zm00001d025266		Zm00001d039597
Zm00001d025265		Zm00001d039533
Zm00001d025226		Zm00001d039513
Zm00001d025208		Zm00001d039495
Zm00001d025146		Zm00001d039464
Zm00001d024960		Zm00001d039394
Zm00001d024876		Zm00001d039323
Zm00001d024454		Zm00001d039301
Zm00001d024384		Zm00001d039150
Zm00001d024272		Zm00001d039086
Zm00001d024265		Zm00001d039058
Zm00001d023994		Zm00001d038998
Zm00001d023944		Zm00001d038891
Zm00001d023941		Zm00001d038884
Zm00001d023516		Zm00001d038883
Zm00001d023480		Zm00001d038725
Zm00001d023450		Zm00001d038717
Zm00001d023421		Zm00001d038712
Zm00001d022794		Zm00001d038667
Zm00001d022701		Zm00001d038665
Zm00001d022457		Zm00001d038585
Zm00001d021897		Zm00001d038563
Zm00001d021781		Zm00001d038538
Zm00001d021699		Zm00001d038471
Zm00001d021647		Zm00001d038443
Zm00001d021453		Zm00001d038387
Zm00001d021299		Zm00001d038291
Zm00001d021168		Zm00001d038250
Zm00001d020984		Zm00001d038216
Zm00001d020982		Zm00001d038211
Zm00001d020961		Zm00001d038065
Zm00001d020953		Zm00001d038052
Zm00001d020870		Zm00001d037868
Zm00001d020446		Zm00001d037768
Zm00001d020125		Zm00001d037724
Zm00001d020017		Zm00001d037715
Zm00001d019933		Zm00001d037632
Zm00001d019223		Zm00001d037327
Zm00001d018809		Zm00001d036768
Zm00001d018738		Zm00001d036737
Zm00001d018707		Zm00001d036676
Zm00001d018700		Zm00001d036464
Zm00001d018641		Zm00001d036014
Zm00001d018340		Zm00001d035684
Zm00001d017976		Zm00001d035603
Zm00001d017975		Zm00001d035468
Zm00001d017974		Zm00001d035462
Zm00001d017969		Zm00001d035306
Zm00001d017669		Zm00001d035134
Zm00001d017531		Zm00001d035119
Zm00001d017429		Zm00001d035090
Zm00001d017347		Zm00001d034986
Zm00001d017019		Zm00001d034877
Zm00001d017014		Zm00001d034787
Zm00001d016950		Zm00001d034783
Zm00001d016567		Zm00001d034778
Zm00001d016441		Zm00001d034643
Zm00001d016219		Zm00001d034642
Zm00001d015852		Zm00001d034641
Zm00001d015798		Zm00001d034463
Zm00001d015693		Zm00001d034130
Zm00001d014945		Zm00001d034078
Zm00001d014649		Zm00001d033957
Zm00001d014637		Zm00001d033870
Zm00001d014405		Zm00001d033747
Zm00001d014318		Zm00001d033714
Zm00001d014282		Zm00001d033711
Zm00001d014134		Zm00001d033464
Zm00001d013941		Zm00001d033447
Zm00001d013907		Zm00001d033389
Zm00001d013629		Zm00001d033385
Zm00001d012596		Zm00001d033296
Zm00001d012510		Zm00001d033231
Zm00001d012220		Zm00001d033222
Zm00001d011486		Zm00001d033050
Zm00001d011157		Zm00001d033049
Zm00001d011080		Zm00001d033024
Zm00001d011003		Zm00001d032495
Zm00001d010870		Zm00001d032473
Zm00001d010543		Zm00001d032295
Zm00001d010284		Zm00001d032187
Zm00001d010044		Zm00001d032138
Zm00001d009945		Zm00001d032120
Zm00001d009705		Zm00001d032115
Zm00001d009514		Zm00001d032102
Zm00001d009398		Zm00001d032088
Zm00001d009395		Zm00001d031971
Zm00001d009178		Zm00001d031934
Zm00001d008853		Zm00001d031911
Zm00001d008541		Zm00001d031833
Zm00001d008465		Zm00001d031826
Zm00001d008273		Zm00001d031801
Zm00001d007843		Zm00001d031773
Zm00001d007803		Zm00001d031725
Zm00001d007549		Zm00001d031678
Zm00001d007485		Zm00001d031657
Zm00001d007401		Zm00001d031555
Zm00001d007381		Zm00001d031290
Zm00001d007285		Zm00001d031211
Zm00001d007187		Zm00001d030915
Zm00001d007081		Zm00001d030614
Zm00001d007056		Zm00001d030163
Zm00001d007016		Zm00001d030069
Zm00001d006825		Zm00001d029803
Zm00001d006672		Zm00001d029783
Zm00001d006538		Zm00001d029778
Zm00001d006536		Zm00001d029718
Zm00001d006535		Zm00001d029717
Zm00001d006165		Zm00001d029711
Zm00001d006137		Zm00001d029680
Zm00001d005743		Zm00001d029546
Zm00001d005593		Zm00001d029371
Zm00001d005439		Zm00001d029366
Zm00001d005355		Zm00001d029172
Zm00001d005158		Zm00001d029098
Zm00001d005002		Zm00001d029028
Zm00001d004999		Zm00001d028930
Zm00001d004899		Zm00001d028838
Zm00001d003966		Zm00001d028826
Zm00001d003679		Zm00001d028725
Zm00001d003422		Zm00001d028574
Zm00001d003365		Zm00001d028447
Zm00001d003355		Zm00001d028406
Zm00001d003353		Zm00001d028270
Zm00001d003190		Zm00001d028172
Zm00001d003058		Zm00001d028011
Zm00001d002974		Zm00001d027988
Zm00001d002964		Zm00001d027955
Zm00001d002901		Zm00001d027932
Zm00001d002678		Zm00001d027929
Zm00001d002434		Zm00001d027901
Zm00001d002351		Zm00001d027900
Zm00001d002350		Zm00001d027899
Zm00001d002347		Zm00001d027877
Zm00001d002285		Zm00001d027812
Zm00001d002282		Zm00001d027763
Zm00001d002216		Zm00001d027760
Zm00001d002215		Zm00001d027601
Zm00001d002182		Zm00001d026662
Zm00001d002164		Zm00001d026563
Zm00001d002159		Zm00001d026297
Zm00001d002137		Zm00001d026271
Zm00001d002132		Zm00001d026222
Zm00001d002113		Zm00001d026204
Zm00001d002111		Zm00001d026203
Zm00001d002066		Zm00001d026060
Zm00001d002020		Zm00001d026028
Zm00001d001313		Zm00001d025947
Zm00001d000829		Zm00001d025900
Zm00001d000748		Zm00001d025818
Zm00001d000738		Zm00001d025752
Zm00001d000686		Zm00001d025751
Zm00001d000483		Zm00001d025572
Zm00001d000350		Zm00001d025524
Zm00001d000298		Zm00001d025477
Zm00001d000006		Zm00001d025401
novel.91		Zm00001d025360
novel.874		Zm00001d025342
novel.87		Zm00001d025340
novel.863		Zm00001d025339
novel.854		Zm00001d025338
novel.828		Zm00001d025337
novel.75		Zm00001d025322
novel.73		Zm00001d025310
novel.717		Zm00001d025235
novel.682		Zm00001d025225
novel.660		Zm00001d025221
novel.620		Zm00001d025205
novel.614		Zm00001d025141
novel.584		Zm00001d025055
novel.556		Zm00001d024833
novel.534		Zm00001d024778
novel.518		Zm00001d024700
novel.503		Zm00001d024522
novel.498		Zm00001d024486
novel.494		Zm00001d024484
novel.406		Zm00001d024477
novel.405		Zm00001d024403
novel.296		Zm00001d024281
novel.288		Zm00001d023945
novel.1973		Zm00001d023901
novel.1939		Zm00001d023799
novel.176		Zm00001d023700
novel.175		Zm00001d023664
novel.1646		Zm00001d023630
novel.1587		Zm00001d023446
novel.1565		Zm00001d023411
novel.156		Zm00001d023348
novel.153		Zm00001d023336
novel.1512		Zm00001d023335
novel.148		Zm00001d023113
novel.1439		Zm00001d022729
novel.1400		Zm00001d022713
novel.1376		Zm00001d022630
novel.137		Zm00001d022553
novel.1320		Zm00001d022478
novel.1319		Zm00001d022461
novel.1288		Zm00001d022460
novel.1261		Zm00001d022449
novel.1242		Zm00001d022415
novel.1227		Zm00001d022396
novel.1198		Zm00001d022367
novel.112		Zm00001d022356
ENSRNA049478949		Zm00001d022327
ENSRNA049478703		Zm00001d022130
ENSRNA049478607		Zm00001d022088
ENSRNA049478183		Zm00001d021995
ENSRNA049478167		Zm00001d021978
ENSRNA049478153		Zm00001d021973
ENSRNA049478144		Zm00001d021971
ENSRNA049478126		Zm00001d021955
ENSRNA049478122		Zm00001d021946
ENSRNA049478113		Zm00001d021905
ENSRNA049477408		Zm00001d021900
ENSRNA049476438		Zm00001d021851
ENSRNA049462318		Zm00001d021836
		Zm00001d021816
		Zm00001d021682
		Zm00001d021665
		Zm00001d021457
		Zm00001d021226
		Zm00001d021208
		Zm00001d021160
		Zm00001d021038
		Zm00001d020976
		Zm00001d020968
		Zm00001d020967
		Zm00001d020937
		Zm00001d020887
		Zm00001d020774
		Zm00001d020772
		Zm00001d020736
		Zm00001d020705
		Zm00001d020631
		Zm00001d020614
		Zm00001d020551
		Zm00001d020487
		Zm00001d020470
		Zm00001d020443
		Zm00001d020403
		Zm00001d020364
		Zm00001d020332
		Zm00001d020308
		Zm00001d020006
		Zm00001d019704
		Zm00001d019450
		Zm00001d019060
		Zm00001d018973
		Zm00001d018915
		Zm00001d018839
		Zm00001d018819
		Zm00001d018729
		Zm00001d018390
		Zm00001d018356
		Zm00001d018350
		Zm00001d018244
		Zm00001d018107
		Zm00001d018080
		Zm00001d018010
		Zm00001d017984
		Zm00001d017852
		Zm00001d017766
		Zm00001d017612
		Zm00001d017598
		Zm00001d017591
		Zm00001d017547
		Zm00001d017502
		Zm00001d017422
		Zm00001d017412
		Zm00001d017366
		Zm00001d017284
		Zm00001d016788
		Zm00001d016719
		Zm00001d016361
		Zm00001d016306
		Zm00001d016066
		Zm00001d015857
		Zm00001d015614
		Zm00001d015572
		Zm00001d015354
		Zm00001d015330
		Zm00001d015053
		Zm00001d014682
		Zm00001d014494
		Zm00001d014493
		Zm00001d014491
		Zm00001d014386
		Zm00001d014253
		Zm00001d014166
		Zm00001d014083
		Zm00001d014029
		Zm00001d014007
		Zm00001d013947
		Zm00001d013834
		Zm00001d013500
		Zm00001d013220
		Zm00001d013111
		Zm00001d013097
		Zm00001d013053
		Zm00001d013042
		Zm00001d012968
		Zm00001d012956
		Zm00001d012693
		Zm00001d012642
		Zm00001d012505
		Zm00001d012484
		Zm00001d012401
		Zm00001d012322
		Zm00001d012304
		Zm00001d012292
		Zm00001d012285
		Zm00001d012079
		Zm00001d011968
		Zm00001d011924
		Zm00001d011919
		Zm00001d011687
		Zm00001d011656
		Zm00001d011655
		Zm00001d011654
		Zm00001d011473
		Zm00001d011451
		Zm00001d011398
		Zm00001d011393
		Zm00001d011208
		Zm00001d010907
		Zm00001d010798
		Zm00001d010752
		Zm00001d010704
		Zm00001d010676
		Zm00001d010652
		Zm00001d010586
		Zm00001d010575
		Zm00001d010406
		Zm00001d010380
		Zm00001d010373
		Zm00001d010201
		Zm00001d010075
		Zm00001d009985
		Zm00001d009626
		Zm00001d009568
		Zm00001d009487
		Zm00001d009419
		Zm00001d009309
		Zm00001d009181
		Zm00001d009160
		Zm00001d009087
		Zm00001d008843
		Zm00001d008841
		Zm00001d008812
		Zm00001d008799
		Zm00001d008716
		Zm00001d008700
		Zm00001d008573
		Zm00001d008370
		Zm00001d008205
		Zm00001d008153
		Zm00001d008073
		Zm00001d007882
		Zm00001d007862
		Zm00001d007845
		Zm00001d007484
		Zm00001d007411
		Zm00001d007341
		Zm00001d007313
		Zm00001d007312
		Zm00001d007181
		Zm00001d007071
		Zm00001d007064
		Zm00001d007026
		Zm00001d007018
		Zm00001d007010
		Zm00001d006941
		Zm00001d006921
		Zm00001d006739
		Zm00001d006711
		Zm00001d006621
		Zm00001d006591
		Zm00001d006511
		Zm00001d006416
		Zm00001d006256
		Zm00001d006169
		Zm00001d006010
		Zm00001d005970
		Zm00001d005945
		Zm00001d005879
		Zm00001d005849
		Zm00001d005841
		Zm00001d005609
		Zm00001d005591
		Zm00001d005028
		Zm00001d004848
		Zm00001d004817
		Zm00001d004755
		Zm00001d004506
		Zm00001d004380
		Zm00001d004346
		Zm00001d004287
		Zm00001d004138
		Zm00001d003938
		Zm00001d003757
		Zm00001d003575
		Zm00001d003563
		Zm00001d003538
		Zm00001d003272
		Zm00001d003249
		Zm00001d003185
		Zm00001d003086
		Zm00001d003052
		Zm00001d002965
		Zm00001d002826
		Zm00001d002754
		Zm00001d002748
		Zm00001d002592
		Zm00001d002546
		Zm00001d002530
		Zm00001d002522
		Zm00001d002521
		Zm00001d002428
		Zm00001d002410
		Zm00001d002364
		Zm00001d001907
		Zm00001d001824
		Zm00001d001820
		Zm00001d001694
		Zm00001d001276
		Zm00001d000879
		Zm00001d000675
		Zm00001d000607
		Zm00001d000414
		Zm00001d000339
		Zm00001d000211
		novel.942
		novel.841
		novel.840
		novel.817
		novel.767
		novel.733
		novel.671
		novel.650
		novel.631
		novel.621
		novel.607
		novel.604
		novel.600
		novel.590
		novel.579
		novel.575
		novel.554
		novel.515
		novel.514
		novel.485
		novel.447
		novel.439
		novel.416
		novel.379
		novel.378
		novel.363
		novel.309
		novel.308
		novel.304
		novel.302
		novel.300
		novel.299
		novel.250
		novel.225
		novel.21
		novel.201
		novel.1977
		novel.1940
		novel.1870
		novel.1862
		novel.1843
		novel.1790
		novel.1789
		novel.1783
		novel.1683
		novel.1655
		novel.1633
		novel.1605
		novel.1550
		novel.1448
		novel.136
		novel.1302
		novel.1246
		novel.1185
		novel.1103
		novel.1100
		novel.1097
		novel.1091
		novel.1068
		novel.1063
		novel.1014
		ENSRNA049478044
		ENSRNA049476973
		ENSRNA049475560
		ENSRNA049474924
		ENSRNA049461441

## Sheet: OE3-DEGs
gene_id-more than 2 times-up		gene_id-more than 2-fold down-regualted
Zm00001d053619		Zm00001d054096
Zm00001d052877		Zm00001d053819
Zm00001d052619		Zm00001d053740
Zm00001d052589		Zm00001d053696
Zm00001d052532		Zm00001d053530
Zm00001d051691		Zm00001d053518
Zm00001d051492		Zm00001d053409
Zm00001d051206		Zm00001d053055
Zm00001d051048		Zm00001d052372
Zm00001d051008		Zm00001d052209
Zm00001d050971		Zm00001d052194
Zm00001d050924		Zm00001d052192
Zm00001d050704		Zm00001d052167
Zm00001d050568		Zm00001d051788
Zm00001d050328		Zm00001d051420
Zm00001d050274		Zm00001d050790
Zm00001d049882		Zm00001d050735
Zm00001d049879		Zm00001d049731
Zm00001d049771		Zm00001d049505
Zm00001d049585		Zm00001d049503
Zm00001d049556		Zm00001d049358
Zm00001d049253		Zm00001d049241
Zm00001d049178		Zm00001d049187
Zm00001d049002		Zm00001d049161
Zm00001d049000		Zm00001d049061
Zm00001d048903		Zm00001d048991
Zm00001d048868		Zm00001d048969
Zm00001d048738		Zm00001d048878
Zm00001d048715		Zm00001d048690
Zm00001d048709		Zm00001d048646
Zm00001d048625		Zm00001d048568
Zm00001d048544		Zm00001d048508
Zm00001d048520		Zm00001d048499
Zm00001d048444		Zm00001d048469
Zm00001d048394		Zm00001d048455
Zm00001d048354		Zm00001d048440
Zm00001d048123		Zm00001d048402
Zm00001d048111		Zm00001d048372
Zm00001d047989		Zm00001d048357
Zm00001d047984		Zm00001d048335
Zm00001d047979		Zm00001d048268
Zm00001d047648		Zm00001d048220
Zm00001d047628		Zm00001d048192
Zm00001d047548		Zm00001d048006
Zm00001d047441		Zm00001d047995
Zm00001d047424		Zm00001d047976
Zm00001d047407		Zm00001d047973
Zm00001d047345		Zm00001d047972
Zm00001d047323		Zm00001d047970
Zm00001d047201		Zm00001d047942
Zm00001d047180		Zm00001d047940
Zm00001d047165		Zm00001d047931
Zm00001d047076		Zm00001d047840
Zm00001d046834		Zm00001d047664
Zm00001d046667		Zm00001d047663
Zm00001d046333		Zm00001d047662
Zm00001d046297		Zm00001d047659
Zm00001d046234		Zm00001d047647
Zm00001d046223		Zm00001d047621
Zm00001d046200		Zm00001d047616
Zm00001d046121		Zm00001d047584
Zm00001d045958		Zm00001d047425
Zm00001d045882		Zm00001d047347
Zm00001d045686		Zm00001d047242
Zm00001d045654		Zm00001d047170
Zm00001d045537		Zm00001d046865
Zm00001d045320		Zm00001d046471
Zm00001d045295		Zm00001d046318
Zm00001d045279		Zm00001d046261
Zm00001d045272		Zm00001d045388
Zm00001d045218		Zm00001d045370
Zm00001d045169		Zm00001d045304
Zm00001d045134		Zm00001d045204
Zm00001d045031		Zm00001d045203
Zm00001d045030		Zm00001d045202
Zm00001d044733		Zm00001d045190
Zm00001d044630		Zm00001d045175
Zm00001d044588		Zm00001d045145
Zm00001d044502		Zm00001d045141
Zm00001d044402		Zm00001d045139
Zm00001d044399		Zm00001d045121
Zm00001d044183		Zm00001d045118
Zm00001d044112		Zm00001d045101
Zm00001d043862		Zm00001d045026
Zm00001d043847		Zm00001d045015
Zm00001d043705		Zm00001d044975
Zm00001d043702		Zm00001d044874
Zm00001d043453		Zm00001d044728
Zm00001d043410		Zm00001d044701
Zm00001d043400		Zm00001d044677
Zm00001d043327		Zm00001d044668
Zm00001d043291		Zm00001d044654
Zm00001d043289		Zm00001d044644
Zm00001d043286		Zm00001d044639
Zm00001d043228		Zm00001d044622
Zm00001d043191		Zm00001d044605
Zm00001d043124		Zm00001d044566
Zm00001d043016		Zm00001d044564
Zm00001d042888		Zm00001d044554
Zm00001d042706		Zm00001d044553
Zm00001d042655		Zm00001d044548
Zm00001d042543		Zm00001d044546
Zm00001d042528		Zm00001d044542
Zm00001d042476		Zm00001d044535
Zm00001d042472		Zm00001d044516
Zm00001d042353		Zm00001d044508
Zm00001d042051		Zm00001d044506
Zm00001d041916		Zm00001d044504
Zm00001d041814		Zm00001d044494
Zm00001d041669		Zm00001d044489
Zm00001d041650		Zm00001d044457
Zm00001d040671		Zm00001d044302
Zm00001d040375		Zm00001d044272
Zm00001d040312		Zm00001d044234
Zm00001d040014		Zm00001d044146
Zm00001d039701		Zm00001d044048
Zm00001d039640		Zm00001d044020
Zm00001d039546		Zm00001d043795
Zm00001d039517		Zm00001d043740
Zm00001d039452		Zm00001d043701
Zm00001d039400		Zm00001d043610
Zm00001d039326		Zm00001d043491
Zm00001d039264		Zm00001d043485
Zm00001d039224		Zm00001d043484
Zm00001d039169		Zm00001d043480
Zm00001d039153		Zm00001d043467
Zm00001d038642		Zm00001d043461
Zm00001d037921		Zm00001d043366
Zm00001d037713		Zm00001d043361
Zm00001d037704		Zm00001d043360
Zm00001d037674		Zm00001d043348
Zm00001d037550		Zm00001d043336
Zm00001d037528		Zm00001d043318
Zm00001d037465		Zm00001d043298
Zm00001d037261		Zm00001d043293
Zm00001d037167		Zm00001d043271
Zm00001d037017		Zm00001d043268
Zm00001d036995		Zm00001d043263
Zm00001d036984		Zm00001d043254
Zm00001d036951		Zm00001d043253
Zm00001d036818		Zm00001d043238
Zm00001d036776		Zm00001d043235
Zm00001d036764		Zm00001d043193
Zm00001d036353		Zm00001d043181
Zm00001d036236		Zm00001d043084
Zm00001d036097		Zm00001d042739
Zm00001d035769		Zm00001d042634
Zm00001d035395		Zm00001d042633
Zm00001d035352		Zm00001d042608
Zm00001d035300		Zm00001d042602
Zm00001d035277		Zm00001d042572
Zm00001d035180		Zm00001d042550
Zm00001d034925		Zm00001d042549
Zm00001d034623		Zm00001d042541
Zm00001d034551		Zm00001d042519
Zm00001d034541		Zm00001d042500
Zm00001d034421		Zm00001d042420
Zm00001d034415		Zm00001d042401
Zm00001d034075		Zm00001d042373
Zm00001d033924		Zm00001d042371
Zm00001d033593		Zm00001d042366
Zm00001d033566		Zm00001d042114
Zm00001d033539		Zm00001d042099
Zm00001d033314		Zm00001d041580
Zm00001d032564		Zm00001d041358
Zm00001d032318		Zm00001d041236
Zm00001d031510		Zm00001d041004
Zm00001d031428		Zm00001d040787
Zm00001d031149		Zm00001d040786
Zm00001d031127		Zm00001d040638
Zm00001d031027		Zm00001d040526
Zm00001d030756		Zm00001d039993
Zm00001d030724		Zm00001d039935
Zm00001d030672		Zm00001d039880
Zm00001d030270		Zm00001d039825
Zm00001d030037		Zm00001d039684
Zm00001d029908		Zm00001d039658
Zm00001d029902		Zm00001d039642
Zm00001d029901		Zm00001d039639
Zm00001d029804		Zm00001d039513
Zm00001d029776		Zm00001d039489
Zm00001d029743		Zm00001d039394
Zm00001d029605		Zm00001d039364
Zm00001d029373		Zm00001d039339
Zm00001d029358		Zm00001d039327
Zm00001d029357		Zm00001d039301
Zm00001d029304		Zm00001d039148
Zm00001d029103		Zm00001d039102
Zm00001d029089		Zm00001d038941
Zm00001d029088		Zm00001d038806
Zm00001d029085		Zm00001d038665
Zm00001d029031		Zm00001d038593
Zm00001d028965		Zm00001d038551
Zm00001d028912		Zm00001d038443
Zm00001d028760		Zm00001d038401
Zm00001d028669		Zm00001d038291
Zm00001d028572		Zm00001d038220
Zm00001d028560		Zm00001d038219
Zm00001d028473		Zm00001d038216
Zm00001d028398		Zm00001d038064
Zm00001d028320		Zm00001d038060
Zm00001d028077		Zm00001d037894
Zm00001d027809		Zm00001d037759
Zm00001d027753		Zm00001d037736
Zm00001d027682		Zm00001d037727
Zm00001d027655		Zm00001d037724
Zm00001d027504		Zm00001d037689
Zm00001d027500		Zm00001d037684
Zm00001d027440		Zm00001d037681
Zm00001d027415		Zm00001d037650
Zm00001d027291		Zm00001d037619
Zm00001d027268		Zm00001d037610
Zm00001d027254		Zm00001d037609
Zm00001d026544		Zm00001d037608
Zm00001d026537		Zm00001d037507
Zm00001d026528		Zm00001d037482
Zm00001d026521		Zm00001d037466
Zm00001d026420		Zm00001d037435
Zm00001d026147		Zm00001d037393
Zm00001d026141		Zm00001d037340
Zm00001d025960		Zm00001d037306
Zm00001d025737		Zm00001d037290
Zm00001d025279		Zm00001d037288
Zm00001d025234		Zm00001d037242
Zm00001d025082		Zm00001d037232
Zm00001d024666		Zm00001d037180
Zm00001d024634		Zm00001d037170
Zm00001d024505		Zm00001d037148
Zm00001d024096		Zm00001d037112
Zm00001d023941		Zm00001d037081
Zm00001d023815		Zm00001d037072
Zm00001d023450		Zm00001d037067
Zm00001d023411		Zm00001d037066
Zm00001d023200		Zm00001d037052
Zm00001d022821		Zm00001d037025
Zm00001d022669		Zm00001d037018
Zm00001d022310		Zm00001d037006
Zm00001d021991		Zm00001d037003
Zm00001d021903		Zm00001d037002
Zm00001d021896		Zm00001d037001
Zm00001d021746		Zm00001d036989
Zm00001d021656		Zm00001d036983
Zm00001d021130		Zm00001d036964
Zm00001d021047		Zm00001d036953
Zm00001d021039		Zm00001d036946
Zm00001d021005		Zm00001d036940
Zm00001d021004		Zm00001d036370
Zm00001d019635		Zm00001d036197
Zm00001d019434		Zm00001d035162
Zm00001d019327		Zm00001d034787
Zm00001d019223		Zm00001d034418
Zm00001d018915		Zm00001d034387
Zm00001d018431		Zm00001d034078
Zm00001d018261		Zm00001d033987
Zm00001d018238		Zm00001d033872
Zm00001d018184		Zm00001d033826
Zm00001d018038		Zm00001d033802
Zm00001d017831		Zm00001d033782
Zm00001d017822		Zm00001d033777
Zm00001d017638		Zm00001d033464
Zm00001d017577		Zm00001d033152
Zm00001d017485		Zm00001d032787
Zm00001d017353		Zm00001d032480
Zm00001d017264		Zm00001d032106
Zm00001d017254		Zm00001d032105
Zm00001d017208		Zm00001d031993
Zm00001d017195		Zm00001d031947
Zm00001d016907		Zm00001d031736
Zm00001d016789		Zm00001d031325
Zm00001d016756		Zm00001d031257
Zm00001d015870		Zm00001d031221
Zm00001d015470		Zm00001d030981
Zm00001d015219		Zm00001d030548
Zm00001d015007		Zm00001d030267
Zm00001d014840		Zm00001d030069
Zm00001d014616		Zm00001d029699
Zm00001d013907		Zm00001d029366
Zm00001d013725		Zm00001d029139
Zm00001d013127		Zm00001d029138
Zm00001d013036		Zm00001d029137
Zm00001d012981		Zm00001d029098
Zm00001d012891		Zm00001d029065
Zm00001d012819		Zm00001d029062
Zm00001d012702		Zm00001d029052
Zm00001d012615		Zm00001d029033
Zm00001d012385		Zm00001d028941
Zm00001d012333		Zm00001d028931
Zm00001d012262		Zm00001d028899
Zm00001d011486		Zm00001d028866
Zm00001d011443		Zm00001d028835
Zm00001d011137		Zm00001d028819
Zm00001d010648		Zm00001d028816
Zm00001d010629		Zm00001d028812
Zm00001d010459		Zm00001d028783
Zm00001d010387		Zm00001d028780
Zm00001d010386		Zm00001d028756
Zm00001d009823		Zm00001d028748
Zm00001d009815		Zm00001d028741
Zm00001d009610		Zm00001d028740
Zm00001d009570		Zm00001d028680
Zm00001d009372		Zm00001d028676
Zm00001d009178		Zm00001d028649
Zm00001d009115		Zm00001d028642
Zm00001d009019		Zm00001d028616
Zm00001d008699		Zm00001d028613
Zm00001d008583		Zm00001d028561
Zm00001d008001		Zm00001d028530
Zm00001d007718		Zm00001d028447
Zm00001d007401		Zm00001d028440
Zm00001d006881		Zm00001d028362
Zm00001d006880		Zm00001d028344
Zm00001d006820		Zm00001d028341
Zm00001d006666		Zm00001d028330
Zm00001d006563		Zm00001d028270
Zm00001d006523		Zm00001d028263
Zm00001d006486		Zm00001d028172
Zm00001d006230		Zm00001d028119
Zm00001d005742		Zm00001d028011
Zm00001d005608		Zm00001d027758
Zm00001d005602		Zm00001d027743
Zm00001d005465		Zm00001d027708
Zm00001d004990		Zm00001d027703
Zm00001d004957		Zm00001d027695
Zm00001d004907		Zm00001d027630
Zm00001d004726		Zm00001d027622
Zm00001d004689		Zm00001d027606
Zm00001d004626		Zm00001d027557
Zm00001d004534		Zm00001d027525
Zm00001d004510		Zm00001d027524
Zm00001d003990		Zm00001d027486
Zm00001d002681		Zm00001d027483
Zm00001d002423		Zm00001d027457
Zm00001d002422		Zm00001d027447
Zm00001d002338		Zm00001d027443
Zm00001d002285		Zm00001d027434
Zm00001d002282		Zm00001d027431
Zm00001d002274		Zm00001d027404
Zm00001d002216		Zm00001d027384
Zm00001d002215		Zm00001d027375
Zm00001d002192		Zm00001d027355
Zm00001d002182		Zm00001d027332
Zm00001d002164		Zm00001d027240
Zm00001d002161		Zm00001d027239
Zm00001d002160		Zm00001d026703
Zm00001d002159		Zm00001d026297
Zm00001d002158		Zm00001d026295
Zm00001d002146		Zm00001d026291
Zm00001d002137		Zm00001d026126
Zm00001d001165		Zm00001d025971
Zm00001d001091		Zm00001d025947
Zm00001d001022		Zm00001d025752
Zm00001d000804		Zm00001d025697
Zm00001d000686		Zm00001d025508
Zm00001d000612		Zm00001d025477
Zm00001d000534		Zm00001d025141
Zm00001d000500		Zm00001d025055
Zm00001d000377		Zm00001d024961
Zm00001d000344		Zm00001d024597
Zm00001d000255		Zm00001d024522
Zm00001d000011		Zm00001d024486
Zm00001d000006		Zm00001d023843
novel.997		Zm00001d023704
novel.992		Zm00001d023611
novel.985		Zm00001d022926
novel.98		Zm00001d022742
novel.97		Zm00001d022725
novel.940		Zm00001d022718
novel.893		Zm00001d022667
novel.889		Zm00001d022589
novel.866		Zm00001d022582
novel.83		Zm00001d022457
novel.821		Zm00001d022188
novel.816		Zm00001d022184
novel.814		Zm00001d022175
novel.804		Zm00001d022154
novel.802		Zm00001d022153
novel.787		Zm00001d022102
novel.745		Zm00001d022089
novel.734		Zm00001d022088
novel.717		Zm00001d022081
novel.715		Zm00001d022062
novel.706		Zm00001d022059
novel.705		Zm00001d022005
novel.694		Zm00001d022000
novel.690		Zm00001d021976
novel.668		Zm00001d021949
novel.667		Zm00001d021935
novel.666		Zm00001d021930
novel.655		Zm00001d021882
novel.650		Zm00001d021851
novel.644		Zm00001d021844
novel.642		Zm00001d021836
novel.641		Zm00001d021822
novel.632		Zm00001d021821
novel.601		Zm00001d021777
novel.6		Zm00001d021770
novel.584		Zm00001d021759
novel.566		Zm00001d021752
novel.53		Zm00001d021727
novel.523		Zm00001d021263
novel.493		Zm00001d020811
novel.48		Zm00001d020006
novel.47		Zm00001d019985
novel.463		Zm00001d019060
novel.462		Zm00001d018839
novel.457		Zm00001d018740
novel.44		Zm00001d018734
novel.436		Zm00001d018729
novel.420		Zm00001d018452
novel.416		Zm00001d018438
novel.415		Zm00001d018241
novel.407		Zm00001d018206
novel.406		Zm00001d018161
novel.405		Zm00001d018046
novel.401		Zm00001d018010
novel.400		Zm00001d017821
novel.398		Zm00001d017491
novel.395		Zm00001d017487
novel.375		Zm00001d017461
novel.353		Zm00001d017438
novel.344		Zm00001d017425
novel.312		Zm00001d017418
novel.3		Zm00001d017412
novel.284		Zm00001d017403
novel.280		Zm00001d017397
novel.264		Zm00001d017387
novel.220		Zm00001d017381
novel.219		Zm00001d017361
novel.203		Zm00001d017357
novel.2010		Zm00001d017336
novel.1995		Zm00001d017290
novel.1950		Zm00001d016558
novel.1929		Zm00001d016128
novel.1921		Zm00001d015589
novel.1914		Zm00001d015498
novel.1899		Zm00001d015354
novel.1896		Zm00001d015330
novel.189		Zm00001d015164
novel.1880		Zm00001d015129
novel.1875		Zm00001d015124
novel.1871		Zm00001d014957
novel.1810		Zm00001d014868
novel.181		Zm00001d014682
novel.1804		Zm00001d014532
novel.1775		Zm00001d014102
novel.1765		Zm00001d014029
novel.1762		Zm00001d013830
novel.1760		Zm00001d013629
novel.1749		Zm00001d013614
novel.1748		Zm00001d013594
novel.174		Zm00001d013448
novel.1725		Zm00001d013313
novel.1718		Zm00001d013179
novel.1717		Zm00001d013153
novel.1696		Zm00001d013101
novel.1692		Zm00001d013099
novel.1689		Zm00001d013098
novel.1671		Zm00001d013055
novel.1653		Zm00001d013039
novel.1651		Zm00001d013031
novel.1637		Zm00001d013026
novel.1632		Zm00001d013004
novel.1629		Zm00001d012995
novel.1615		Zm00001d012980
novel.161		Zm00001d012979
novel.1597		Zm00001d012972
novel.1565		Zm00001d012956
novel.1564		Zm00001d012900
novel.1562		Zm00001d012687
novel.1548		Zm00001d012551
novel.1544		Zm00001d012420
novel.1535		Zm00001d012292
novel.1534		Zm00001d012148
novel.1529		Zm00001d011839
novel.1527		Zm00001d011679
novel.1512		Zm00001d011446
novel.1504		Zm00001d011438
novel.1502		Zm00001d010961
novel.1500		Zm00001d010586
novel.1498		Zm00001d010560
novel.1496		Zm00001d010428
novel.1478		Zm00001d010416
novel.1468		Zm00001d009641
novel.1460		Zm00001d009631
novel.1443		Zm00001d009586
novel.1439		Zm00001d009524
novel.1424		Zm00001d009187
novel.1402		Zm00001d009084
novel.1399		Zm00001d008985
novel.1389		Zm00001d008795
novel.1361		Zm00001d008604
novel.1357		Zm00001d008570
novel.1356		Zm00001d008370
novel.1352		Zm00001d008283
novel.1351		Zm00001d008209
novel.1341		Zm00001d007764
novel.1334		Zm00001d007606
novel.1285		Zm00001d007513
novel.1276		Zm00001d007403
novel.1275		Zm00001d007341
novel.1235		Zm00001d007312
novel.1232		Zm00001d006254
novel.1231		Zm00001d006010
novel.1229		Zm00001d005591
novel.1209		Zm00001d005196
novel.1208		Zm00001d004755
novel.1204		Zm00001d004738
novel.1199		Zm00001d004366
novel.1196		Zm00001d004305
novel.1190		Zm00001d004138
novel.1187		Zm00001d003938
novel.1186		Zm00001d003809
novel.1183		Zm00001d003516
novel.1181		Zm00001d003501
novel.1168		Zm00001d003355
novel.1134		Zm00001d003209
novel.1129		Zm00001d003136
novel.1128		Zm00001d002847
novel.1107		Zm00001d002755
novel.1103		Zm00001d002707
novel.1096		Zm00001d002614
novel.1074		Zm00001d002593
novel.1060		Zm00001d002434
novel.1049		Zm00001d002428
novel.1034		Zm00001d002425
novel.103		Zm00001d002377
novel.1026		Zm00001d002316
novel.1018		Zm00001d002213
novel.1016		Zm00001d002208
novel.1007		Zm00001d002199
novel.1006		Zm00001d002181
novel.1002		Zm00001d002174
ENSRNA049472638		Zm00001d002136
		Zm00001d001760
		Zm00001d001759
		Zm00001d001758
		Zm00001d001714
		Zm00001d001711
		Zm00001d001703
		Zm00001d001432
		Zm00001d001425
		Zm00001d001414
		Zm00001d001267
		Zm00001d000706
		Zm00001d000682
		Zm00001d000681
		Zm00001d000675
		Zm00001d000652
		Zm00001d000647
		Zm00001d000211
		novel.931
		novel.892
		novel.820
		novel.817
		novel.805
		novel.803
		novel.801
		novel.800
		novel.799
		novel.738
		novel.732
		novel.726
		novel.725
		novel.721
		novel.720
		novel.704
		novel.698
		novel.621
		novel.607
		novel.604
		novel.539
		novel.482
		novel.410
		novel.369
		novel.294
		novel.271
		novel.255
		novel.25
		novel.238
		novel.236
		novel.225
		novel.2
		novel.1988
		novel.1986
		novel.1976
		novel.1974
		novel.1940
		novel.1908
		novel.1905
		novel.1903
		novel.1900
		novel.19
		novel.1834
		novel.1790
		novel.1763
		novel.1655
		novel.1633
		novel.1605
		novel.156
		novel.1550
		novel.1549
		novel.1547
		novel.152
		novel.1448
		novel.1447
		novel.1446
		novel.1442
		novel.1441
		novel.141
		novel.1364
		novel.1360
		novel.1355
		novel.1354
		novel.1349
		novel.1342
		novel.1283
		novel.1237
		novel.1207
		novel.1193
		novel.1185
		novel.1150
		novel.1135
		novel.1122
		novel.1110
		novel.1101
		novel.1097
		ENSRNA049477741
		ENSRNA049477080
		ENSRNA049474924
		ENSRNA049463813
		ENSRNA049463774
		ENSRNA049462331
		ENSRNA049459132
		ENSRNA049459076
