# Supplementary material for: SDG102, a H3K36-Methyltransferase-Encoding Gene, Plays Pleiotropic Roles in Growth and Development of Maize (Zea mays L.)
Source: Int J Mol Sci. 2022 Jul 5;23(13):7458. doi: 10.3390/ijms23137458 (PMC9267571; doi:10.3390/ijms23137458)
Supplement: Supplementary file 1 [file ijms-23-07458-s001.zip › Table S3 Significant GO on DEGs with fold change 2 and FDR 0.05.xlsx]

## Sheet: AS1_DOWN_2_Times_GOenrich_signi
Category	GOID	Description	GeneRatio	BgRatio	pvalue	padj	geneID	geneName	Count
BP	GO:0001101	response to acid chemical	24/340	477/22306	3.69e-07	6.45e-05	Zm00001d020614/Zm00001d016361/Zm00001d017547/Zm00001d027900/Zm00001d024778/Zm00001d023664/Zm00001d006621/Zm00001d027901/Zm00001d028574/Zm00001d009626/Zm00001d048268/Zm00001d014253/Zm00001d051420/Zm00001d039495/Zm00001d048263/Zm00001d031773/Zm00001d033049/Zm00001d033050/Zm00001d038065/Zm00001d002546/Zm00001d027899/Zm00001d032473/Zm00001d007862/Zm00001d010575	ZIM-transcription factor 28/C2C2-GATA-transcription factor 15/-/ZIM-transcription factor 27/NaCl stress protein1/-/-/ZIM-transcription factor 16/-/protein phosphatase homolog9/ZIM-transcription factor 14/ZIM-transcription factor 10/-/-/ZIM-transcription factor 4/-/ZIM-transcription factor 3/ZIM-transcription factor 18/-/H4C7/ZIM-transcription factor 26/-/pangloss2/H4C7	24
BP	GO:0009755	hormone-mediated signaling pathway	22/340	412/22306	4.23e-07	6.45e-05	Zm00001d020614/Zm00001d039513/Zm00001d017284/Zm00001d041418/Zm00001d027900/Zm00001d045026/Zm00001d006621/Zm00001d027901/Zm00001d028574/Zm00001d018973/Zm00001d009626/Zm00001d048268/Zm00001d014253/Zm00001d039495/Zm00001d048263/Zm00001d027877/Zm00001d033049/Zm00001d033050/Zm00001d034463/Zm00001d027899/Zm00001d032473/Zm00001d007862	ZIM-transcription factor 28/Aux/IAA-transcription factor 7/-/Aux/IAA-transcription factor 11/ZIM-transcription factor 27/ARF-transcription factor 27/-/ZIM-transcription factor 16/-/Aux/IAA-transcription factor 32/protein phosphatase homolog9/ZIM-transcription factor 14/ZIM-transcription factor 10/-/ZIM-transcription factor 4/-/ZIM-transcription factor 3/ZIM-transcription factor 18/Aux/IAA-transcr…	22
BP	GO:0032870	cellular response to hormone stimulus	22/340	434/22306	1.01e-06	9.63e-05	Zm00001d020614/Zm00001d039513/Zm00001d017284/Zm00001d041418/Zm00001d027900/Zm00001d045026/Zm00001d006621/Zm00001d027901/Zm00001d028574/Zm00001d018973/Zm00001d009626/Zm00001d048268/Zm00001d014253/Zm00001d039495/Zm00001d048263/Zm00001d027877/Zm00001d033049/Zm00001d033050/Zm00001d034463/Zm00001d027899/Zm00001d032473/Zm00001d007862	ZIM-transcription factor 28/Aux/IAA-transcription factor 7/-/Aux/IAA-transcription factor 11/ZIM-transcription factor 27/ARF-transcription factor 27/-/ZIM-transcription factor 16/-/Aux/IAA-transcription factor 32/protein phosphatase homolog9/ZIM-transcription factor 14/ZIM-transcription factor 10/-/ZIM-transcription factor 4/-/ZIM-transcription factor 3/ZIM-transcription factor 18/Aux/IAA-transcr…	22
BP	GO:0071495	cellular response to endogenous stimulus	22/340	443/22306	1.42e-06	0.000120061	Zm00001d020614/Zm00001d039513/Zm00001d017284/Zm00001d041418/Zm00001d027900/Zm00001d045026/Zm00001d006621/Zm00001d027901/Zm00001d028574/Zm00001d018973/Zm00001d009626/Zm00001d048268/Zm00001d014253/Zm00001d039495/Zm00001d048263/Zm00001d027877/Zm00001d033049/Zm00001d033050/Zm00001d034463/Zm00001d027899/Zm00001d032473/Zm00001d007862	ZIM-transcription factor 28/Aux/IAA-transcription factor 7/-/Aux/IAA-transcription factor 11/ZIM-transcription factor 27/ARF-transcription factor 27/-/ZIM-transcription factor 16/-/Aux/IAA-transcription factor 32/protein phosphatase homolog9/ZIM-transcription factor 14/ZIM-transcription factor 10/-/ZIM-transcription factor 4/-/ZIM-transcription factor 3/ZIM-transcription factor 18/Aux/IAA-transcr…	22
BP	GO:0006952	defense response	16/340	431/22306	0.00102597	0.0391407	Zm00001d043263/Zm00001d044723/Zm00001d046261/Zm00001d020614/Zm00001d003757/Zm00001d027900/Zm00001d042926/Zm00001d015053/Zm00001d027901/Zm00001d048268/Zm00001d014253/Zm00001d048263/Zm00001d033049/Zm00001d021160/Zm00001d033050/Zm00001d027899	diacylglycerol kinase7/-/-/ZIM-transcription factor 28/-/ZIM-transcription factor 27/-/terpene synthase2/ZIM-transcription factor 16/ZIM-transcription factor 14/ZIM-transcription factor 10/ZIM-transcription factor 4/ZIM-transcription factor 3/-/ZIM-transcription factor 18/ZIM-transcription factor 26	16
BP	GO:0009733	response to auxin	15/340	266/22306	1.58e-05	0.0010931	Zm00001d039513/Zm00001d002826/Zm00001d017284/Zm00001d041418/Zm00001d033464/Zm00001d051302/Zm00001d045026/Zm00001d021457/Zm00001d015354/Zm00001d025947/Zm00001d018973/Zm00001d014682/Zm00001d027877/Zm00001d032088/Zm00001d034463	Aux/IAA-transcription factor 7/-/-/Aux/IAA-transcription factor 11/-/-/ARF-transcription factor 27/-/-/-/Aux/IAA-transcription factor 32/-/-/-/Aux/IAA-transcription factor5	15
BP	GO:0071229	cellular response to acid chemical	15/340	273/22306	2.14e-05	0.00135856	Zm00001d020614/Zm00001d027900/Zm00001d006621/Zm00001d027901/Zm00001d028574/Zm00001d009626/Zm00001d048268/Zm00001d014253/Zm00001d039495/Zm00001d048263/Zm00001d033049/Zm00001d033050/Zm00001d027899/Zm00001d032473/Zm00001d007862	ZIM-transcription factor 28/ZIM-transcription factor 27/-/ZIM-transcription factor 16/-/protein phosphatase homolog9/ZIM-transcription factor 14/ZIM-transcription factor 10/-/ZIM-transcription factor 4/ZIM-transcription factor 3/ZIM-transcription factor 18/ZIM-transcription factor 26/-/pangloss2	15
BP	GO:1901701	cellular response to oxygen-containing compound	15/340	373/22306	0.000655894	0.0263393	Zm00001d020614/Zm00001d027900/Zm00001d006621/Zm00001d027901/Zm00001d028574/Zm00001d009626/Zm00001d048268/Zm00001d014253/Zm00001d039495/Zm00001d048263/Zm00001d033049/Zm00001d033050/Zm00001d027899/Zm00001d032473/Zm00001d007862	ZIM-transcription factor 28/ZIM-transcription factor 27/-/ZIM-transcription factor 16/-/protein phosphatase homolog9/ZIM-transcription factor 14/ZIM-transcription factor 10/-/ZIM-transcription factor 4/ZIM-transcription factor 3/ZIM-transcription factor 18/ZIM-transcription factor 26/-/pangloss2	15
MF	GO:0051213	dioxygenase activity	13/380	207/25251	1.68e-05	0.00501179	Zm00001d048634/Zm00001d017766/Zm00001d033222/Zm00001d011208/Zm00001d037724/Zm00001d047744/Zm00001d018819/Zm00001d039394/Zm00001d049926/Zm00001d035462/Zm00001d013053/Zm00001d039533/Zm00001d025524	benzoxazinone synthesis6/nine-cis-epoxycarotenoid dioxygenase8/viviparous14/-/gibberellin 2-oxidase6/-/nine-cis-epoxycarotenoid dioxygenase5/gibberellin 2-oxidase13/-/-/-/-/lipoxygenase7	13
BP	GO:0009611	response to wounding	11/340	107/22306	7.39e-07	8.21e-05	Zm00001d020614/Zm00001d027900/Zm00001d015053/Zm00001d027901/Zm00001d048268/Zm00001d014253/Zm00001d048263/Zm00001d033049/Zm00001d033050/Zm00001d035684/Zm00001d027899	ZIM-transcription factor 28/ZIM-transcription factor 27/terpene synthase2/ZIM-transcription factor 16/ZIM-transcription factor 14/ZIM-transcription factor 10/ZIM-transcription factor 4/ZIM-transcription factor 3/ZIM-transcription factor 18/-/ZIM-transcription factor 26	11
BP	GO:0009966	regulation of signal transduction	11/340	160/22306	3.62e-05	0.00212196	Zm00001d020614/Zm00001d027900/Zm00001d027901/Zm00001d009626/Zm00001d048268/Zm00001d014253/Zm00001d048263/Zm00001d033049/Zm00001d033050/Zm00001d027899/Zm00001d007862	ZIM-transcription factor 28/ZIM-transcription factor 27/ZIM-transcription factor 16/protein phosphatase homolog9/ZIM-transcription factor 14/ZIM-transcription factor 10/ZIM-transcription factor 4/ZIM-transcription factor 3/ZIM-transcription factor 18/ZIM-transcription factor 26/pangloss2	11
BP	GO:0023051	regulation of signaling	11/340	162/22306	4.05e-05	0.00218098	Zm00001d020614/Zm00001d027900/Zm00001d027901/Zm00001d009626/Zm00001d048268/Zm00001d014253/Zm00001d048263/Zm00001d033049/Zm00001d033050/Zm00001d027899/Zm00001d007862	ZIM-transcription factor 28/ZIM-transcription factor 27/ZIM-transcription factor 16/protein phosphatase homolog9/ZIM-transcription factor 14/ZIM-transcription factor 10/ZIM-transcription factor 4/ZIM-transcription factor 3/ZIM-transcription factor 18/ZIM-transcription factor 26/pangloss2	11
BP	GO:0010646	regulation of cell communication	11/340	163/22306	4.29e-05	0.00218098	Zm00001d020614/Zm00001d027900/Zm00001d027901/Zm00001d009626/Zm00001d048268/Zm00001d014253/Zm00001d048263/Zm00001d033049/Zm00001d033050/Zm00001d027899/Zm00001d007862	ZIM-transcription factor 28/ZIM-transcription factor 27/ZIM-transcription factor 16/protein phosphatase homolog9/ZIM-transcription factor 14/ZIM-transcription factor 10/ZIM-transcription factor 4/ZIM-transcription factor 3/ZIM-transcription factor 18/ZIM-transcription factor 26/pangloss2	11
BP	GO:0009867	jasmonic acid mediated signaling pathway	10/340	68/22306	7.88e-08	2.66e-05	Zm00001d020614/Zm00001d027900/Zm00001d027901/Zm00001d048268/Zm00001d014253/Zm00001d039495/Zm00001d048263/Zm00001d033049/Zm00001d033050/Zm00001d027899	ZIM-transcription factor 28/ZIM-transcription factor 27/ZIM-transcription factor 16/ZIM-transcription factor 14/ZIM-transcription factor 10/-/ZIM-transcription factor 4/ZIM-transcription factor 3/ZIM-transcription factor 18/ZIM-transcription factor 26	10
BP	GO:0071395	cellular response to jasmonic acid stimulus	10/340	70/22306	1.05e-07	2.66e-05	Zm00001d020614/Zm00001d027900/Zm00001d027901/Zm00001d048268/Zm00001d014253/Zm00001d039495/Zm00001d048263/Zm00001d033049/Zm00001d033050/Zm00001d027899	ZIM-transcription factor 28/ZIM-transcription factor 27/ZIM-transcription factor 16/ZIM-transcription factor 14/ZIM-transcription factor 10/-/ZIM-transcription factor 4/ZIM-transcription factor 3/ZIM-transcription factor 18/ZIM-transcription factor 26	10
BP	GO:0009753	response to jasmonic acid	10/340	86/22306	7.53e-07	8.21e-05	Zm00001d020614/Zm00001d027900/Zm00001d027901/Zm00001d048268/Zm00001d014253/Zm00001d039495/Zm00001d048263/Zm00001d033049/Zm00001d033050/Zm00001d027899	ZIM-transcription factor 28/ZIM-transcription factor 27/ZIM-transcription factor 16/ZIM-transcription factor 14/ZIM-transcription factor 10/-/ZIM-transcription factor 4/ZIM-transcription factor 3/ZIM-transcription factor 18/ZIM-transcription factor 26	10
BP	GO:0031347	regulation of defense response	10/340	103/22306	3.99e-06	0.000304503	Zm00001d020614/Zm00001d027900/Zm00001d015053/Zm00001d027901/Zm00001d048268/Zm00001d014253/Zm00001d048263/Zm00001d033049/Zm00001d033050/Zm00001d027899	ZIM-transcription factor 28/ZIM-transcription factor 27/terpene synthase2/ZIM-transcription factor 16/ZIM-transcription factor 14/ZIM-transcription factor 10/ZIM-transcription factor 4/ZIM-transcription factor 3/ZIM-transcription factor 18/ZIM-transcription factor 26	10
BP	GO:0080134	regulation of response to stress	10/340	175/22306	0.000368566	0.0161743	Zm00001d020614/Zm00001d027900/Zm00001d015053/Zm00001d027901/Zm00001d048268/Zm00001d014253/Zm00001d048263/Zm00001d033049/Zm00001d033050/Zm00001d027899	ZIM-transcription factor 28/ZIM-transcription factor 27/terpene synthase2/ZIM-transcription factor 16/ZIM-transcription factor 14/ZIM-transcription factor 10/ZIM-transcription factor 4/ZIM-transcription factor 3/ZIM-transcription factor 18/ZIM-transcription factor 26	10
BP	GO:2000022	regulation of jasmonic acid mediated signaling pathway	9/340	46/22306	2.68e-08	2.04e-05	Zm00001d020614/Zm00001d027900/Zm00001d027901/Zm00001d048268/Zm00001d014253/Zm00001d048263/Zm00001d033049/Zm00001d033050/Zm00001d027899	ZIM-transcription factor 28/ZIM-transcription factor 27/ZIM-transcription factor 16/ZIM-transcription factor 14/ZIM-transcription factor 10/ZIM-transcription factor 4/ZIM-transcription factor 3/ZIM-transcription factor 18/ZIM-transcription factor 26	9
BP	GO:0031098	stress-activated protein kinase signaling cascade	5/340	35/22306	0.000178121	0.00849412	Zm00001d043741/Zm00001d043740/Zm00001d011655/Zm00001d038883/Zm00001d011654	-/-/MAP kinase kinase kinase18/-/-	5
BP	GO:0008300	isoprenoid catabolic process	5/340	41/22306	0.00038157	0.0161743	Zm00001d017766/Zm00001d033222/Zm00001d037724/Zm00001d018819/Zm00001d039394	nine-cis-epoxycarotenoid dioxygenase8/viviparous14/gibberellin 2-oxidase6/nine-cis-epoxycarotenoid dioxygenase5/gibberellin 2-oxidase13	5

## Sheet: AS1_UP_2_Times_GOenrich_signifi
Category	GOID	Description	GeneRatio	BgRatio	pvalue	padj	geneID	geneName	Count
MF	GO:0030246	carbohydrate binding	14/247	324/25251	4.20704e-06	0.00123687	Zm00001d031873/Zm00001d031407/Zm00001d045839/Zm00001d023516/Zm00001d030555/Zm00001d050164/Zm00001d007843/Zm00001d045838/Zm00001d043257/Zm00001d039924/Zm00001d040094/Zm00001d008273/Zm00001d021897/Zm00001d007803	-/-/-/-/-/-/-/-/-/-/-/-/-/-	14
MF	GO:0016709	oxidoreductase activity, acting on paired donors, with incorporation or reduction of molecular oxygen, NAD(P)H as one donor, and incorporation of one atom of oxygen	10/247	220/25251	6.61921e-05	0.00973024	Zm00001d027537/Zm00001d035294/Zm00001d012510/Zm00001d014134/Zm00001d034095/Zm00001d005439/Zm00001d032467/Zm00001d046374/Zm00001d036763/Zm00001d027908	-/-/-/-/-/yucca9/AC210173.4_FG005/-/-/-	10
MF	GO:0080044	quercetin 7-O-glucosyltransferase activity	6/247	101/25251	0.000481334	0.037286	Zm00001d046460/Zm00001d006137/Zm00001d042739/Zm00001d033320/Zm00001d021168/Zm00001d052211	-/-/-/-/-/-	6
MF	GO:0080043	quercetin 3-O-glucosyltransferase activity	6/247	102/25251	0.000507293	0.037286	Zm00001d046460/Zm00001d006137/Zm00001d042739/Zm00001d033320/Zm00001d021168/Zm00001d052211	-/-/-/-/-/-	6
MF	GO:0070008	serine-type exopeptidase activity	5/247	71/25251	0.000661965	0.0389235	Zm00001d030172/Zm00001d047201/Zm00001d029776/Zm00001d009178/Zm00001d002678	-/-/-/-/-	5
MF	GO:0004364	glutathione transferase activity	5/247	76/25251	0.000902905	0.0442424	Zm00001d029696/Zm00001d018809/Zm00001d010870/Zm00001d041772/Zm00001d043344	glutathione transferase34/glutathione transferase6/glutathione transferase15/glutathione transferase18/glutathione transferase8	5

## Sheet: OE3_UP_2_Time3_GOenrich_signifi
Category	GOID	Description	GeneRatio	BgRatio	pvalue	padj	geneID	geneName	Count
MF	GO:0008199	ferric iron binding	4/272	11/25251	4.09502e-06	0.00131041	Zm00001d000344/Zm00001d003990/Zm00001d016907/Zm00001d033566	-/-/E2F-DP-transcription factor 28/E2F-DP-transcription factor 23	4
MF	GO:0008198	ferrous iron binding	4/272	22/25251	8.26752e-05	0.013228	Zm00001d000344/Zm00001d003990/Zm00001d016907/Zm00001d033566	-/-/E2F-DP-transcription factor 28/E2F-DP-transcription factor 23	4
MF	GO:0016832	aldehyde-lyase activity	4/272	27/25251	0.000190126	0.0202801	Zm00001d005608/Zm00001d010387/Zm00001d048709/Zm00001d049253	-/-/benzoxazinless1/-	4
MF	GO:0003993	acid phosphatase activity	5/272	58/25251	0.000401875	0.024958	Zm00001d000344/Zm00001d003990/Zm00001d016907/Zm00001d033566/Zm00001d043291	-/-/E2F-DP-transcription factor 28/E2F-DP-transcription factor 23/-	5
MF	GO:0000036	acyl carrier activity	3/272	16/25251	0.000623949	0.024958	Zm00001d021004/Zm00001d029901/Zm00001d029902	-/-/-	3
MF	GO:0016297	acyl-[acyl-carrier-protein] hydrolase activity	3/272	16/25251	0.000623949	0.024958	Zm00001d021004/Zm00001d029901/Zm00001d029902	-/-/-	3
MF	GO:0044620	ACP phosphopantetheine attachment site binding	3/272	16/25251	0.000623949	0.024958	Zm00001d021004/Zm00001d029901/Zm00001d029902	-/-/-	3
MF	GO:0051192	prosthetic group binding	3/272	16/25251	0.000623949	0.024958	Zm00001d021004/Zm00001d029901/Zm00001d029902	-/-/-	3
MF	GO:0004185	serine-type carboxypeptidase activity	5/272	66/25251	0.000730914	0.0259881	Zm00001d009178/Zm00001d029373/Zm00001d029776/Zm00001d047201/Zm00001d051206	-/-/-/-/-	5
MF	GO:0070008	serine-type exopeptidase activity	5/272	71/25251	0.00101941	0.0326212	Zm00001d009178/Zm00001d029373/Zm00001d029776/Zm00001d047201/Zm00001d051206	-/-/-/-/-	5

## Sheet: OE3_down_2_Time2_GOenrich_signi
Category	GOID	Description	GeneRatio	BgRatio	pvalue	padj	geneID	geneName	Count
BP	GO:0009266	response to temperature stimulus	16/290	238/22306	1.00476e-07	8.55049e-05	Zm00001d012420/Zm00001d021263/Zm00001d025508/Zm00001d028362/Zm00001d028561/Zm00001d031736/Zm00001d033987/Zm00001d037736/Zm00001d037894/Zm00001d038806/Zm00001d044548/Zm00001d044728/Zm00001d046471/Zm00001d049187/Zm00001d051420/Zm00001d052194	heat shock protein1/HSF-transcription factor 10/-/-/-/HSF-transcription factor 8/HSF-transcription factor 17/-/dehydrin1/heat-shock protein 101/-/-/-/phosphogluconate dehydrogenase3/-/heat shock protein22	16
BP	GO:0009408	response to heat	11/290	155/22306	6.12506e-06	0.00260621	Zm00001d012420/Zm00001d021263/Zm00001d025508/Zm00001d028362/Zm00001d028561/Zm00001d031736/Zm00001d033987/Zm00001d038806/Zm00001d044728/Zm00001d046471/Zm00001d052194	heat shock protein1/HSF-transcription factor 10/-/-/-/HSF-transcription factor 8/HSF-transcription factor 17/heat-shock protein 101/-/-/heat shock protein22	11
BP	GO:0042445	hormone metabolic process	10/290	177/22306	0.000112668	0.0319603	Zm00001d008570/Zm00001d013098/Zm00001d013629/Zm00001d023843/Zm00001d034387/Zm00001d037724/Zm00001d039394/Zm00001d043235/Zm00001d043293/Zm00001d043701	-/aldehyde oxidase2/-/-/aldehyde oxidase1/gibberellin 2-oxidase6/gibberellin 2-oxidase13/-/cytokinin oxidase 4/-	10
BP	GO:0048544	recognition of pollen	6/290	69/22306	0.000276602	0.0458658	Zm00001d002174/Zm00001d002181/Zm00001d002199/Zm00001d021727/Zm00001d039327/Zm00001d043253	-/-/-/-/-/-	6
BP	GO:0008037	cell recognition	6/290	70/22306	0.000299274	0.0458658	Zm00001d002174/Zm00001d002181/Zm00001d002199/Zm00001d021727/Zm00001d039327/Zm00001d043253	-/-/-/-/-/-	6
BP	GO:0009875	pollen-pistil interaction	6/290	71/22306	0.000323378	0.0458658	Zm00001d002174/Zm00001d002181/Zm00001d002199/Zm00001d021727/Zm00001d039327/Zm00001d043253	-/-/-/-/-/-	6
