# Supplementary material for: SDG102, a H3K36-Methyltransferase-Encoding Gene, Plays Pleiotropic Roles in Growth and Development of Maize (Zea mays L.)
Source: Int J Mol Sci. 2022 Jul 5;23(13):7458. doi: 10.3390/ijms23137458 (PMC9267571; doi:10.3390/ijms23137458)
Supplement: Supplementary file 1 [file ijms-23-07458-s001.zip › Table S4 Gene list with significant changed H3K36me3.xlsx]

## Sheet: AS1
geneId	log2foldchange(>2)
ENSRNA049437614	-2.13299
ENSRNA049439996	-3.99221
ENSRNA049440843	-3.348
ENSRNA049446119	-2.0626
ENSRNA049448588	-5.38453
ENSRNA049450072	-2.16214
ENSRNA049451572	-2.86257
ENSRNA049451852	-3.32563
ENSRNA049454111	-2.62157
ENSRNA049454767	-2.58616
ENSRNA049455202	-3.38453
ENSRNA049456826	-3.57717
ENSRNA049458634	-2.12971
ENSRNA049458742	-2.21872
ENSRNA049458758	-2.36758
ENSRNA049458782	-2.13813
ENSRNA049459593	-2.36628
ENSRNA049459833	-2.32974
ENSRNA049459930	-3.69265
ENSRNA049460114	-2.71468
ENSRNA049460169	-2.12971
ENSRNA049461556	-2.18416
ENSRNA049463774	-3.18361
ENSRNA049463846	-3.47925
ENSRNA049465879	-4.04184
ENSRNA049466270	-2.53137
ENSRNA049471660	-2.2647
ENSRNA049472261	-4.20166
ENSRNA049473008	-4.8846
ENSRNA049474364	-3.43714
ENSRNA049474375	-4.76502
ENSRNA049475429	-2.32925
ENSRNA049476610	-5.38453
ENSRNA049476922	-4.7471
ENSRNA049477514	-4.60574
ENSRNA049479424	-2.07383
ENSRNA049479501	-2.85813
ENSRNA049997069	-2.71468
ENSRNA049997360	-2.19776
Zm00001d000042	-2.62554
Zm00001d000053	-3.41067
Zm00001d000074	-2.64756
Zm00001d000116	-2.97771
Zm00001d000123	-3.32563
Zm00001d000135	-2.16214
Zm00001d000169	-3.27317
Zm00001d000176	-2.60271
Zm00001d000178	-2.34717
Zm00001d000184	-2.63162
Zm00001d000199	-3.7471
Zm00001d000213	-4.18143
Zm00001d000224	-2.46314
Zm00001d000228	-2.25524
Zm00001d000295	-2.31612
Zm00001d000300	-2.80368
Zm00001d000312	-3.34976
Zm00001d000313	-3.38453
Zm00001d000314	-2.29549
Zm00001d000339	-2.71468
Zm00001d000349	-2.1724
Zm00001d000361	-2.4633
Zm00001d000370	-2.16868
Zm00001d000390	-3.57717
Zm00001d000391	-2.06017
Zm00001d000396	-3.09319
Zm00001d000408	-2.16214
Zm00001d000432	-2.58129
Zm00001d000439	-5.05522
Zm00001d000469	-4.45164
Zm00001d000485	-3.12031
Zm00001d000507	-2.52471
Zm00001d000540	-3.14764
Zm00001d000546	-2.09175
Zm00001d000550	-2.71468
Zm00001d000552	-3.94873
Zm00001d000564	-4.84021
Zm00001d000576	-2.8455
Zm00001d000585	-2.35478
Zm00001d000589	-5.06076
Zm00001d000635	-2.50823
Zm00001d000640	-2.12561
Zm00001d000662	-2.91993
Zm00001d000667	-2.04184
Zm00001d000682	-5.7326
Zm00001d000684	-2.42517
Zm00001d000695	-2.42517
Zm00001d000707	-2.28767
Zm00001d000725	-4.01013
Zm00001d000727	-2.49228
Zm00001d000778	-3.40364
Zm00001d000790	-3.01013
Zm00001d000791	-2.47764
Zm00001d000799	-2.21104
Zm00001d000801	-3.26167
Zm00001d000869	-5.6731
Zm00001d000877	-2.2888
Zm00001d000888	-2.0366
Zm00001d000916	-2.03285
Zm00001d000978	-2.31351
Zm00001d001012	-2.32563
Zm00001d001090	-2.25524
Zm00001d001101	-4.77567
Zm00001d001113	-2.00459
Zm00001d001128	-2.30559
Zm00001d001135	-3.09586
Zm00001d001140	-2.38453
Zm00001d001158	-3.28078
Zm00001d001213	-2.17278
Zm00001d001230	-2.01013
Zm00001d001233	-2.6882
Zm00001d001236	-2.66221
Zm00001d001261	-2.71468
Zm00001d001285	-3.76304
Zm00001d001289	-2.56267
Zm00001d001324	-2.60776
Zm00001d001395	-2.04184
Zm00001d001475	-2.9586
Zm00001d001490	-3.06002
Zm00001d001504	-2.20772
Zm00001d001514	-2.20944
Zm00001d001516	-2.61084
Zm00001d001526	-2.77881
Zm00001d001540	-3.10073
Zm00001d001582	-2.38453
Zm00001d001645	-2.71468
Zm00001d001668	-2.29964
Zm00001d001678	-3.35478
Zm00001d001679	-2.23449
Zm00001d001691	-3.52203
Zm00001d001696	-2.9106
Zm00001d001742	-3.10324
Zm00001d001743	-2.18813
Zm00001d001750	-2.55598
Zm00001d001765	-2.03285
Zm00001d001788	-2.8991
Zm00001d001803	-2.53653
Zm00001d001810	-3.52471
Zm00001d001824	-2.71468
Zm00001d001832	-5.57717
Zm00001d001840	-2.18416
Zm00001d001847	-2.01327
Zm00001d001848	-2.17363
Zm00001d001850	-2.02078
Zm00001d001865	-4.48406
Zm00001d001869	-4.35117
Zm00001d001870	-3.01013
Zm00001d001881	-3.7471
Zm00001d001882	-4.13299
Zm00001d001884	-3.42517
Zm00001d001897	-3.05522
Zm00001d001923	-3.18124
Zm00001d001924	-2.6882
Zm00001d001928	-3.29964
Zm00001d001932	-2.9106
Zm00001d001947	-2.93707
Zm00001d001951	-3.14764
Zm00001d001952	-3.4131
Zm00001d001953	-2.02887
Zm00001d001962	-2.8991
Zm00001d001968	-2.12031
Zm00001d001970	-2.92113
Zm00001d001974	-2.36144
Zm00001d001978	-3.99221
Zm00001d001980	-2.42837
Zm00001d001983	-2.00602
Zm00001d001986	-2.16214
Zm00001d001988	-2.43302
Zm00001d001996	-4.48406
Zm00001d001999	-2.10324
Zm00001d002003	-2.39758
Zm00001d002006	-4.10073
Zm00001d002012	-2.01869
Zm00001d002022	-2.61009
Zm00001d002025	-2.54065
Zm00001d002026	-2.0626
Zm00001d002027	-2.26311
Zm00001d002032	-3.0626
Zm00001d002039	-2.23252
Zm00001d002051	-2.53571
Zm00001d002054	-2.64756
Zm00001d002056	-5.09319
Zm00001d002079	-6.41006
Zm00001d002085	-2.8991
Zm00001d002089	-2.17624
Zm00001d002093	-2.59509
Zm00001d002099	-2.99549
Zm00001d002104	-2.65734
Zm00001d002125	-2.84021
Zm00001d002141	-3.22806
Zm00001d002143	-2.31846
Zm00001d002144	-2.05878
Zm00001d002147	-2.32563
Zm00001d002148	-2.09175
Zm00001d002149	-2.09247
Zm00001d002150	-3.8991
Zm00001d002154	-2.94454
Zm00001d002157	-4.54065
Zm00001d002174	-2.84021
Zm00001d002184	-2.33206
Zm00001d002186	-2.81749
Zm00001d002190	-4.08813
Zm00001d002212	-3.47248
Zm00001d002235	-3.58018
Zm00001d002241	-2.64756
Zm00001d002243	-3.04184
Zm00001d002254	-2.21367
Zm00001d002256	-3.7471
Zm00001d002271	-2.40273
Zm00001d002272	-3.01013
Zm00001d002275	-2.93332
Zm00001d002288	-2.39275
Zm00001d002302	-2.09003
Zm00001d002311	-3.42517
Zm00001d002313	-3.38453
Zm00001d002314	-2.84687
Zm00001d002315	-2.7471
Zm00001d002325	-3.13299
Zm00001d002326	-2.48561
Zm00001d002328	-3.77881
Zm00001d002341	-2.61904
Zm00001d002349	-3.7471
Zm00001d002352	-2.12561
Zm00001d002358	-3.0626
Zm00001d002359	-5.24231
Zm00001d002362	-2.96574
Zm00001d002366	-2.4016
Zm00001d002369	-2.12971
Zm00001d002371	-4.15055
Zm00001d002373	-3.74067
Zm00001d002377	-2.64756
Zm00001d002388	-4.42517
Zm00001d002389	-5.66464
Zm00001d002396	-2.42517
Zm00001d002415	-2.67028
Zm00001d002418	-2.77881
Zm00001d002419	-2.0626
Zm00001d002420	-2.30255
Zm00001d002424	-5.16214
Zm00001d002425	-2.12778
Zm00001d002430	-4.51828
Zm00001d002433	-2.79957
Zm00001d002439	-3.27317
Zm00001d002444	-3.53208
Zm00001d002451	-2.7471
Zm00001d002456	-3.01013
Zm00001d002462	-2.60998
Zm00001d002481	-2.8251
Zm00001d002491	-3.31825
Zm00001d002510	-4.33206
Zm00001d002511	-2.06421
Zm00001d002532	-4.2001
Zm00001d002534	-4.14277
Zm00001d002538	-2.1907
Zm00001d002540	-2.79699
Zm00001d002548	-2.6731
Zm00001d002576	-2.25163
Zm00001d002585	-2.29024
Zm00001d002586	-2.31414
Zm00001d002589	-2.00666
Zm00001d002594	-2.34271
Zm00001d002598	-3.10324
Zm00001d002603	-2.22487
Zm00001d002611	-2.85531
Zm00001d002621	-2.01775
Zm00001d002625	-2.71468
Zm00001d002631	-2.8846
Zm00001d002639	-2.04184
Zm00001d002641	-3.34271
Zm00001d002642	-3.09319
Zm00001d002650	-2.36377
Zm00001d002654	-2.07265
Zm00001d002656	-3.06903
Zm00001d002662	-3.51577
Zm00001d002679	-2.54065
Zm00001d002683	-5.348
Zm00001d002690	-4.10324
Zm00001d002735	-4.23252
Zm00001d002758	-2.96949
Zm00001d002770	-2.77881
Zm00001d002771	-4.27761
Zm00001d002778	-6.36377
Zm00001d002789	-2.66618
Zm00001d002810	-2.15078
Zm00001d002822	-3.24717
Zm00001d002824	-3.85019
Zm00001d002826	-2.93707
Zm00001d002842	-2.42517
Zm00001d002854	-2.2001
Zm00001d002856	-2.32563
Zm00001d002857	-2.01775
Zm00001d002865	-2.10139
Zm00001d002868	-3.01013
Zm00001d002889	-3.51006
Zm00001d002905	-2.44224
Zm00001d002925	-2.50763
Zm00001d002938	-2.82159
Zm00001d002941	-3.43515
Zm00001d002944	-2.96574
Zm00001d002945	-2.70129
Zm00001d002946	-2.93707
Zm00001d002951	-2.66513
Zm00001d002962	-2.85019
Zm00001d002963	-3.29964
Zm00001d002964	-4.10967
Zm00001d002967	-4.93613
Zm00001d003002	-2.40441
Zm00001d003003	-2.9579
Zm00001d003004	-2.10699
Zm00001d003014	-2.11085
Zm00001d003032	-4.35026
Zm00001d003062	-2.05337
Zm00001d003072	-2.09175
Zm00001d003083	-3.00721
Zm00001d003087	-2.49228
Zm00001d003089	-2.54065
Zm00001d003112	-2.0259
Zm00001d003126	-2.33562
Zm00001d003151	-3.64756
Zm00001d003166	-2.84021
Zm00001d003176	-3.7944
Zm00001d003179	-2.16214
Zm00001d003180	-6.86257
Zm00001d003192	-2.37072
Zm00001d003196	-2.38078
Zm00001d003198	-4.10073
Zm00001d003203	-2.57717
Zm00001d003207	-2.10324
Zm00001d003209	-3.45688
Zm00001d003212	-2.38538
Zm00001d003226	-2.50317
Zm00001d003239	-2.40029
Zm00001d003248	-4.17112
Zm00001d003257	-2.27317
Zm00001d003259	-2.42517
Zm00001d003262	-3.01013
Zm00001d003266	-2.14833
Zm00001d003274	-2.72091
Zm00001d003275	-3.00418
Zm00001d003291	-2.04184
Zm00001d003341	-4.8991
Zm00001d003382	-3.27317
Zm00001d003395	-2.65587
Zm00001d003401	-3.36377
Zm00001d003408	-3.07725
Zm00001d003426	-3.42517
Zm00001d003438	-2.58437
Zm00001d003452	-2.25008
Zm00001d003460	-2.43373
Zm00001d003462	-2.03922
Zm00001d003470	-2.01459
Zm00001d003502	-3.41512
Zm00001d003508	-3.08532
Zm00001d003517	-4.01013
Zm00001d003518	-2.31937
Zm00001d003539	-2.76982
Zm00001d003556	-5.26167
Zm00001d003589	-2.17363
Zm00001d003590	-2.02924
Zm00001d003611	-2.48406
Zm00001d003621	-2.34028
Zm00001d003644	-4.23252
Zm00001d003647	-2.81421
Zm00001d003654	-2.39001
Zm00001d003655	-3.64756
Zm00001d003689	-2.04305
Zm00001d003731	-5.77881
Zm00001d003786	-3.85813
Zm00001d003788	-2.20278
Zm00001d003792	-2.9106
Zm00001d003812	-2.01013
Zm00001d003817	-3.42517
Zm00001d003839	-5.40245
Zm00001d003846	-4.0366
Zm00001d003848	-2.60488
Zm00001d003864	-2.16214
Zm00001d003878	-2.54803
Zm00001d003879	-3.25455
Zm00001d003894	-5.33206
Zm00001d003895	-2.12527
Zm00001d003904	-2.60574
Zm00001d003913	-3.49556
Zm00001d003914	-2.83763
Zm00001d003917	-2.27727
Zm00001d003923	-2.73883
Zm00001d003941	-2.69265
Zm00001d003945	-2.35478
Zm00001d003947	-2.47764
Zm00001d003958	-2.40541
Zm00001d003970	-4.73502
Zm00001d003978	-2.51828
Zm00001d003984	-2.82813
Zm00001d004023	-3.20944
Zm00001d004033	-2.97771
Zm00001d004051	-2.84021
Zm00001d004085	-2.02078
Zm00001d004091	-3.32563
Zm00001d004098	-2.97179
Zm00001d004119	-2.27317
Zm00001d004136	-2.31414
Zm00001d004139	-2.78083
Zm00001d004152	-2.1907
Zm00001d004154	-4.4131
Zm00001d004155	-5.29964
Zm00001d004159	-4.02607
Zm00001d004176	-4.0012
Zm00001d004196	-3.36377
Zm00001d004300	-4.29964
Zm00001d004361	-2.69043
Zm00001d004383	-3.93974
Zm00001d004392	-3.86995
Zm00001d004396	-2.12455
Zm00001d004428	-2.16214
Zm00001d004438	-3.21218
Zm00001d004457	-2.51417
Zm00001d004463	-2.20944
Zm00001d004499	-2.04184
Zm00001d004521	-2.1907
Zm00001d004543	-2.11563
Zm00001d004552	-2.81749
Zm00001d004564	-3.45759
Zm00001d004566	-2.44287
Zm00001d004568	-3.08813
Zm00001d004573	-3.49556
Zm00001d004580	-2.77881
Zm00001d004639	-5.08813
Zm00001d004640	-3.2001
Zm00001d004644	-3.66221
Zm00001d004650	-2.58744
Zm00001d004651	-6.08813
Zm00001d004655	-2.16214
Zm00001d004659	-3.43515
Zm00001d004667	-2.6424
Zm00001d004669	-5.48406
Zm00001d004676	-2.01013
Zm00001d004702	-3.15006
Zm00001d004703	-4.16214
Zm00001d004709	-2.23824
Zm00001d004733	-2.4861
Zm00001d004739	-3.85019
Zm00001d004740	-2.03613
Zm00001d004771	-4.08813
Zm00001d004782	-3.52203
Zm00001d004790	-2.77357
Zm00001d004812	-3.15525
Zm00001d004861	-2.23252
Zm00001d004874	-4.29964
Zm00001d004894	-2.40441
Zm00001d004898	-2.42517
Zm00001d004927	-2.70646
Zm00001d004930	-2.26905
Zm00001d004936	-2.78774
Zm00001d004956	-3.52471
Zm00001d004976	-2.17808
Zm00001d004977	-4.66862
Zm00001d004978	-2.5651
Zm00001d004979	-2.03362
Zm00001d004992	-2.00405
Zm00001d004993	-2.69819
Zm00001d005004	-2.95568
Zm00001d005006	-3.7471
Zm00001d005012	-4.35478
Zm00001d005019	-2.22627
Zm00001d005023	-3.14764
Zm00001d005030	-2.27751
Zm00001d005062	-3.96949
Zm00001d005064	-2.51577
Zm00001d005072	-2.35478
Zm00001d005082	-2.25233
Zm00001d005085	-3.34271
Zm00001d005089	-2.33206
Zm00001d005100	-3.57717
Zm00001d005106	-2.54935
Zm00001d005107	-2.14687
Zm00001d005127	-2.0873
Zm00001d005135	-2.34047
Zm00001d005144	-2.97771
Zm00001d005170	-3.15984
Zm00001d005179	-2.02078
Zm00001d005188	-3.8846
Zm00001d005240	-5.01013
Zm00001d005241	-2.78272
Zm00001d005244	-4.0626
Zm00001d005248	-3.02607
Zm00001d005250	-2.7471
Zm00001d005257	-2.16214
Zm00001d005269	-3.71795
Zm00001d005270	-2.51577
Zm00001d005276	-2.64756
Zm00001d005281	-2.37165
Zm00001d005295	-5.96949
Zm00001d005323	-2.40147
Zm00001d005338	-2.05522
Zm00001d005343	-2.76982
Zm00001d005347	-3.02196
Zm00001d005357	-4.8846
Zm00001d005358	-2.60574
Zm00001d005369	-2.31825
Zm00001d005372	-3.34271
Zm00001d005373	-2.54065
Zm00001d005393	-2.24014
Zm00001d005395	-2.27317
Zm00001d005399	-2.64756
Zm00001d005406	-3.24014
Zm00001d005431	-2.47248
Zm00001d005445	-3.97361
Zm00001d005450	-2.87322
Zm00001d005453	-3.06903
Zm00001d005459	-5.04184
Zm00001d005466	-3.67671
Zm00001d005502	-3.99549
Zm00001d005503	-3.18124
Zm00001d005506	-2.42517
Zm00001d005507	-2.51006
Zm00001d005516	-3.11323
Zm00001d005548	-2.50162
Zm00001d005558	-2.27107
Zm00001d005563	-2.45164
Zm00001d005573	-2.14764
Zm00001d005579	-2.10824
Zm00001d005607	-2.01013
Zm00001d005609	-2.03285
Zm00001d005614	-3.10699
Zm00001d005628	-2.51509
Zm00001d005638	-3.36377
Zm00001d005641	-3.16214
Zm00001d005647	-6.16214
Zm00001d005680	-2.41512
Zm00001d005693	-2.52471
Zm00001d005697	-4.06517
Zm00001d005727	-2.64756
Zm00001d005748	-2.26167
Zm00001d005762	-4.01013
Zm00001d005785	-2.46079
Zm00001d005794	-2.64756
Zm00001d005812	-3.38453
Zm00001d005818	-4.96949
Zm00001d005828	-2.8492
Zm00001d005848	-3.20278
Zm00001d005902	-2.03613
Zm00001d005912	-2.19384
Zm00001d005925	-4.81749
Zm00001d005934	-2.27317
Zm00001d005970	-2.3727
Zm00001d005972	-2.99221
Zm00001d005975	-2.42517
Zm00001d005976	-2.2462
Zm00001d005981	-4.57717
Zm00001d006010	-2.54803
Zm00001d006011	-4.29964
Zm00001d006046	-2.65518
Zm00001d006053	-3.93707
Zm00001d006055	-2.32563
Zm00001d006061	-2.27712
Zm00001d006090	-3.12455
Zm00001d006098	-2.50881
Zm00001d006102	-2.02607
Zm00001d006106	-2.00167
Zm00001d006107	-2.74325
Zm00001d006113	-2.8991
Zm00001d006128	-4.35117
Zm00001d006168	-3.50909
Zm00001d006185	-2.23252
Zm00001d006192	-2.43373
Zm00001d006203	-2.01559
Zm00001d006210	-3.84021
Zm00001d006212	-2.01013
Zm00001d006214	-2.58867
Zm00001d006221	-3.0012
Zm00001d006226	-2.88751
Zm00001d006246	-3.16214
Zm00001d006249	-2.38453
Zm00001d006255	-2.63607
Zm00001d006267	-2.2146
Zm00001d006270	-3.85813
Zm00001d006291	-2.9106
Zm00001d006294	-3.62157
Zm00001d006296	-2.00721
Zm00001d006309	-2.1087
Zm00001d006321	-2.33497
Zm00001d006322	-3.45164
Zm00001d006323	-2.28767
Zm00001d006330	-2.45688
Zm00001d006331	-2.01636
Zm00001d006335	-3.92767
Zm00001d006336	-2.49625
Zm00001d006337	-3.81421
Zm00001d006343	-2.83505
Zm00001d006350	-4.33562
Zm00001d006354	-4.12971
Zm00001d006361	-2.25008
Zm00001d006369	-2.38335
Zm00001d006370	-2.22627
Zm00001d006371	-2.76621
Zm00001d006372	-3.63607
Zm00001d006374	-5.5651
Zm00001d006376	-3.81421
Zm00001d006377	-3.6731
Zm00001d006384	-2.5362
Zm00001d006410	-3.24231
Zm00001d006416	-2.71468
Zm00001d006417	-4.37764
Zm00001d006421	-2.01013
Zm00001d006433	-5.37937
Zm00001d006451	-2.86995
Zm00001d006457	-3.42517
Zm00001d006458	-2.11705
Zm00001d006459	-2.50317
Zm00001d006461	-2.2001
Zm00001d006473	-4.08122
Zm00001d006480	-3.44902
Zm00001d006481	-3.27761
Zm00001d006488	-2.92767
Zm00001d006497	-2.47068
Zm00001d006499	-2.28767
Zm00001d006509	-2.52471
Zm00001d006533	-2.38335
Zm00001d006573	-4.87263
Zm00001d006578	-2.59311
Zm00001d006580	-3.21718
Zm00001d006588	-2.36377
Zm00001d006592	-2.85019
Zm00001d006593	-2.42698
Zm00001d006596	-2.8991
Zm00001d006597	-2.04184
Zm00001d006602	-2.21177
Zm00001d006606	-2.78408
Zm00001d006607	-3.64756
Zm00001d006608	-3.36675
Zm00001d006614	-2.31968
Zm00001d006625	-2.8991
Zm00001d006627	-4.38453
Zm00001d006639	-3.40314
Zm00001d006644	-2.75859
Zm00001d006657	-4.43373
Zm00001d006659	-2.34532
Zm00001d006663	-2.8846
Zm00001d006670	-2.21367
Zm00001d006673	-2.16214
Zm00001d006679	-2.38864
Zm00001d006681	-3.86995
Zm00001d006682	-2.09319
Zm00001d006700	-3.21422
Zm00001d006704	-2.83806
Zm00001d006705	-3.07725
Zm00001d006750	-2.42517
Zm00001d006751	-5.12561
Zm00001d006758	-2.20278
Zm00001d006759	-5.17112
Zm00001d006762	-3.90322
Zm00001d006763	-2.01013
Zm00001d006769	-3.02102
Zm00001d006789	-2.42517
Zm00001d006795	-3.17808
Zm00001d006798	-4.06076
Zm00001d006808	-3.72556
Zm00001d006834	-4.54065
Zm00001d006856	-2.26423
Zm00001d006857	-2.55598
Zm00001d006864	-2.1961
Zm00001d006899	-3.05825
Zm00001d006906	-3.43714
Zm00001d006916	-2.40364
Zm00001d006917	-3.57201
Zm00001d006918	-3.79957
Zm00001d006931	-2.8991
Zm00001d006939	-2.70415
Zm00001d006951	-3.46956
Zm00001d007031	-3.81749
Zm00001d007032	-3.48721
Zm00001d007034	-2.28078
Zm00001d007042	-4.21718
Zm00001d007043	-2.26871
Zm00001d007044	-3.97976
Zm00001d007065	-2.42927
Zm00001d007067	-2.34142
Zm00001d007068	-2.23571
Zm00001d007070	-2.21872
Zm00001d007071	-2.42517
Zm00001d007075	-3.32809
Zm00001d007076	-2.64756
Zm00001d007080	-2.78842
Zm00001d007081	-3.24014
Zm00001d007089	-3.04469
Zm00001d007096	-2.94712
Zm00001d007097	-2.47764
Zm00001d007121	-2.02078
Zm00001d007139	-3.45164
Zm00001d007151	-2.16214
Zm00001d007158	-2.35781
Zm00001d007172	-3.85218
Zm00001d007173	-2.11323
Zm00001d007184	-2.28499
Zm00001d007186	-2.45606
Zm00001d007188	-2.30587
Zm00001d007208	-2.3727
Zm00001d007213	-2.96306
Zm00001d007227	-3.29964
Zm00001d007229	-2.57717
Zm00001d007233	-3.42517
Zm00001d007234	-2.6691
Zm00001d007241	-3.20678
Zm00001d007251	-2.18383
Zm00001d007260	-2.11705
Zm00001d007261	-2.64756
Zm00001d007270	-3.56267
Zm00001d007302	-3.92767
Zm00001d007307	-2.69582
Zm00001d007318	-2.57356
Zm00001d007320	-3.01013
Zm00001d007328	-2.27761
Zm00001d007357	-2.00602
Zm00001d007369	-3.38453
Zm00001d007378	-2.82425
Zm00001d007383	-2.94712
Zm00001d007388	-2.0626
Zm00001d007407	-3.10324
Zm00001d007418	-3.12561
Zm00001d007424	-2.15006
Zm00001d007434	-3.46956
Zm00001d007435	-3.80599
Zm00001d007436	-2.77881
Zm00001d007442	-4.09319
Zm00001d007445	-2.33206
Zm00001d007450	-2.48406
Zm00001d007454	-2.52471
Zm00001d007455	-5.0366
Zm00001d007465	-3.71057
Zm00001d007467	-2.5651
Zm00001d007508	-2.01013
Zm00001d007517	-2.42517
Zm00001d007518	-5.46665
Zm00001d007530	-2.01013
Zm00001d007548	-2.31825
Zm00001d007549	-2.29964
Zm00001d007571	-2.84021
Zm00001d007572	-2.34271
Zm00001d007585	-2.47199
Zm00001d007596	-2.31825
Zm00001d007598	-5.54757
Zm00001d007599	-2.69582
Zm00001d007630	-2.88984
Zm00001d007632	-2.16214
Zm00001d007635	-2.37626
Zm00001d007638	-4.31053
Zm00001d007640	-3.88751
Zm00001d007645	-2.57717
Zm00001d007650	-2.49228
Zm00001d007675	-2.6278
Zm00001d007678	-3.01013
Zm00001d007679	-3.04184
Zm00001d007692	-2.10324
Zm00001d007698	-2.57717
Zm00001d007716	-3.64756
Zm00001d007719	-2.55641
Zm00001d007755	-4.08122
Zm00001d007759	-2.51577
Zm00001d007760	-3.99549
Zm00001d007764	-3.08675
Zm00001d007766	-2.40441
Zm00001d007769	-5.86257
Zm00001d007770	-2.92767
Zm00001d007783	-2.61514
Zm00001d007784	-2.01013
Zm00001d007786	-3.87834
Zm00001d007806	-2.0366
Zm00001d007837	-2.6882
Zm00001d007851	-2.96949
Zm00001d007864	-2.91821
Zm00001d007889	-4.16214
Zm00001d007892	-3.48406
Zm00001d007898	-3.84663
Zm00001d007904	-2.5651
Zm00001d007905	-2.8991
Zm00001d007919	-3.0626
Zm00001d007927	-2.52471
Zm00001d007929	-2.73329
Zm00001d007936	-2.09161
Zm00001d007938	-2.01775
Zm00001d007939	-2.6882
Zm00001d007940	-3.31414
Zm00001d007943	-2.49556
Zm00001d007946	-2.85813
Zm00001d007953	-2.13887
Zm00001d007954	-2.00085
Zm00001d007959	-4.12149
Zm00001d007996	-3.00631
Zm00001d008003	-2.93707
Zm00001d008004	-3.23742
Zm00001d008018	-3.10324
Zm00001d008019	-2.27205
Zm00001d008036	-3.12149
Zm00001d008040	-2.08813
Zm00001d008045	-2.0626
Zm00001d008079	-2.54381
Zm00001d008086	-2.58504
Zm00001d008140	-3.04349
Zm00001d008152	-3.64756
Zm00001d008162	-2.20278
Zm00001d008171	-2.12345
Zm00001d008176	-2.38453
Zm00001d008216	-2.23008
Zm00001d008225	-2.1907
Zm00001d008230	-2.50738
Zm00001d008233	-4.57717
Zm00001d008236	-2.64756
Zm00001d008248	-2.7259
Zm00001d008250	-2.67189
Zm00001d008256	-3.20944
Zm00001d008257	-2.1907
Zm00001d008259	-2.26167
Zm00001d008278	-3.33206
Zm00001d008288	-2.2837
Zm00001d008294	-2.71468
Zm00001d008298	-4.46372
Zm00001d008307	-2.03285
Zm00001d008310	-3.84021
Zm00001d008314	-2.80284
Zm00001d008315	-3.04966
Zm00001d008320	-2.01013
Zm00001d008321	-2.23252
Zm00001d008322	-3.04666
Zm00001d008330	-2.26311
Zm00001d008338	-2.36377
Zm00001d008339	-2.96122
Zm00001d008340	-2.70528
Zm00001d008345	-2.29553
Zm00001d008354	-3.10699
Zm00001d008357	-2.79839
Zm00001d008363	-2.43777
Zm00001d008386	-3.7471
Zm00001d008389	-3.54065
Zm00001d008390	-4.85019
Zm00001d008394	-3.08813
Zm00001d008412	-4.55445
Zm00001d008413	-2.14764
Zm00001d008417	-3.22925
Zm00001d008428	-3.6268
Zm00001d008429	-3.51782
Zm00001d008495	-3.93332
Zm00001d008499	-2.6882
Zm00001d008513	-2.12971
Zm00001d008515	-2.09704
Zm00001d008559	-2.51828
Zm00001d008567	-2.24702
Zm00001d008596	-2.3982
Zm00001d008606	-2.84021
Zm00001d008613	-2.65518
Zm00001d008614	-3.64756
Zm00001d008633	-2.27761
Zm00001d008648	-3.29964
Zm00001d008654	-4.42517
Zm00001d008666	-2.99221
Zm00001d008679	-2.93472
Zm00001d008708	-2.58129
Zm00001d008720	-4.49556
Zm00001d008725	-2.20973
Zm00001d008726	-2.16214
Zm00001d008733	-2.62157
Zm00001d008736	-2.23252
Zm00001d008737	-3.85401
Zm00001d008738	-2.45164
Zm00001d008743	-3.49758
Zm00001d008744	-2.73699
Zm00001d008752	-2.88984
Zm00001d008759	-3.77357
Zm00001d008763	-3.06903
Zm00001d008772	-2.32563
Zm00001d008781	-2.37626
Zm00001d008789	-2.01013
Zm00001d008812	-2.54916
Zm00001d008844	-2.70528
Zm00001d008846	-3.47764
Zm00001d008847	-2.27786
Zm00001d008856	-3.23252
Zm00001d008858	-3.14764
Zm00001d008863	-2.89465
Zm00001d008875	-2.64756
Zm00001d008904	-3.20278
Zm00001d008906	-2.80368
Zm00001d008911	-4.0366
Zm00001d008929	-2.27751
Zm00001d008930	-2.01708
Zm00001d008940	-3.57201
Zm00001d008954	-2.40655
Zm00001d008962	-4.7471
Zm00001d008970	-2.81818
Zm00001d008980	-2.19384
Zm00001d008984	-2.46314
Zm00001d008993	-2.29785
Zm00001d008997	-5.94873
Zm00001d009014	-2.37981
Zm00001d009021	-3.57717
Zm00001d009055	-2.60959
Zm00001d009076	-2.72556
Zm00001d009077	-3.01013
Zm00001d009131	-3.89465
Zm00001d009160	-2.14363
Zm00001d009171	-3.45492
Zm00001d009186	-2.06903
Zm00001d009229	-2.67846
Zm00001d009233	-4.18006
Zm00001d009236	-2.36424
Zm00001d009248	-2.51828
Zm00001d009269	-2.8991
Zm00001d009314	-3.84021
Zm00001d009315	-3.38453
Zm00001d009316	-4.38453
Zm00001d009317	-3.23252
Zm00001d009330	-2.27317
Zm00001d009331	-2.52471
Zm00001d009337	-2.38453
Zm00001d009339	-4.69819
Zm00001d009346	-2.09759
Zm00001d009371	-2.99633
Zm00001d009395	-4.35117
Zm00001d009396	-3.31414
Zm00001d009409	-2.24014
Zm00001d009418	-2.79736
Zm00001d009424	-4.54065
Zm00001d009439	-2.9106
Zm00001d009449	-3.21658
Zm00001d009452	-4.2496
Zm00001d009504	-2.26167
Zm00001d009513	-3.84021
Zm00001d009520	-2.27317
Zm00001d009522	-2.64068
Zm00001d009525	-3.0626
Zm00001d009540	-3.91631
Zm00001d009541	-2.40245
Zm00001d009542	-2.16214
Zm00001d009549	-2.39602
Zm00001d009555	-2.02208
Zm00001d009562	-3.5651
Zm00001d009571	-2.51006
Zm00001d009579	-2.38078
Zm00001d009591	-2.50317
Zm00001d009597	-2.08907
Zm00001d009600	-2.7471
Zm00001d009613	-3.35478
Zm00001d009618	-2.58465
Zm00001d009676	-2.32563
Zm00001d009695	-2.30898
Zm00001d009700	-3.29964
Zm00001d009716	-3.16625
Zm00001d009717	-2.17363
Zm00001d009719	-2.93974
Zm00001d009723	-2.37072
Zm00001d009738	-2.21276
Zm00001d009740	-2.27761
Zm00001d009745	-3.55445
Zm00001d009746	-2.98425
Zm00001d009749	-2.68374
Zm00001d009750	-2.21016
Zm00001d009760	-3.01013
Zm00001d009762	-2.31937
Zm00001d009765	-2.84021
Zm00001d009771	-2.62157
Zm00001d009780	-2.56891
Zm00001d009783	-2.6882
Zm00001d009791	-3.0481
Zm00001d009792	-2.23252
Zm00001d009810	-2.39275
Zm00001d009816	-2.36377
Zm00001d009837	-2.27761
Zm00001d009844	-2.28499
Zm00001d009850	-2.53535
Zm00001d009879	-5.23252
Zm00001d009883	-3.38453
Zm00001d009902	-3.02721
Zm00001d009903	-3.45688
Zm00001d009923	-3.2384
Zm00001d009928	-2.3904
Zm00001d009930	-3.42517
Zm00001d009950	-2.06122
Zm00001d009954	-2.63162
Zm00001d009987	-2.23252
Zm00001d010000	-3.20278
Zm00001d010009	-3.38453
Zm00001d010022	-3.02607
Zm00001d010023	-3.08122
Zm00001d010032	-2.13768
Zm00001d010047	-2.74862
Zm00001d010053	-2.04666
Zm00001d010068	-2.36377
Zm00001d010082	-2.47962
Zm00001d010109	-2.80599
Zm00001d010121	-3.7471
Zm00001d010126	-2.97771
Zm00001d010166	-2.04184
Zm00001d010168	-2.02502
Zm00001d010183	-3.16214
Zm00001d010198	-2.36144
Zm00001d010206	-2.12031
Zm00001d010241	-2.03459
Zm00001d010248	-2.0626
Zm00001d010251	-2.35478
Zm00001d010274	-2.78774
Zm00001d010290	-3.26647
Zm00001d010294	-2.41512
Zm00001d010302	-4.16214
Zm00001d010305	-3.50317
Zm00001d010309	-2.04457
Zm00001d010315	-2.57717
Zm00001d010322	-5.42517
Zm00001d010324	-2.47764
Zm00001d010336	-2.15697
Zm00001d010341	-4.81749
Zm00001d010373	-3.10073
Zm00001d010421	-2.97361
Zm00001d010431	-2.32563
Zm00001d010447	-3.16214
Zm00001d010454	-3.18416
Zm00001d010470	-2.04184
Zm00001d010478	-2.08813
Zm00001d010480	-3.2001
Zm00001d010491	-2.11323
Zm00001d010493	-2.75774
Zm00001d010497	-4.55445
Zm00001d010500	-3.23252
Zm00001d010522	-2.98392
Zm00001d010523	-2.11323
Zm00001d010537	-2.20123
Zm00001d010546	-2.22994
Zm00001d010567	-2.67815
Zm00001d010572	-2.33206
Zm00001d010577	-3.16214
Zm00001d010578	-3.86257
Zm00001d010588	-4.17112
Zm00001d010599	-4.7944
Zm00001d010606	-2.25524
Zm00001d010607	-2.31414
Zm00001d010615	-2.00371
Zm00001d010618	-2.35478
Zm00001d010622	-2.27317
Zm00001d010625	-2.28905
Zm00001d010634	-3.0626
Zm00001d010646	-3.07967
Zm00001d010656	-3.79219
Zm00001d010678	-2.06026
Zm00001d010700	-2.16214
Zm00001d010703	-2.30361
Zm00001d010710	-4.23252
Zm00001d010714	-2.32563
Zm00001d010716	-2.83519
Zm00001d010719	-2.04576
Zm00001d010720	-2.15336
Zm00001d010784	-2.8846
Zm00001d010792	-2.59509
Zm00001d010799	-3.29087
Zm00001d010800	-2.12005
Zm00001d010811	-4.96949
Zm00001d010824	-2.17036
Zm00001d010845	-2.42517
Zm00001d010851	-2.20278
Zm00001d010868	-2.45759
Zm00001d010872	-3.51577
Zm00001d010892	-2.16725
Zm00001d010901	-3.47506
Zm00001d010908	-2.41367
Zm00001d010918	-4.4507
Zm00001d010920	-2.76858
Zm00001d010927	-3.01013
Zm00001d010940	-3.71694
Zm00001d010946	-2.12031
Zm00001d010950	-3.88857
Zm00001d010954	-2.24231
Zm00001d010971	-3.95568
Zm00001d010974	-2.60176
Zm00001d010975	-2.51828
Zm00001d010982	-2.47026
Zm00001d010987	-3.8991
Zm00001d010996	-2.34071
Zm00001d011041	-3.34271
Zm00001d011055	-4.64018
Zm00001d011086	-2.16214
Zm00001d011087	-2.18034
Zm00001d011091	-2.27317
Zm00001d011093	-2.89465
Zm00001d011095	-2.57717
Zm00001d011096	-2.16214
Zm00001d011099	-2.49174
Zm00001d011134	-3.42517
Zm00001d011136	-7.16214
Zm00001d011138	-3.54803
Zm00001d011144	-3.02463
Zm00001d011147	-2.10769
Zm00001d011149	-2.47872
Zm00001d011150	-3.01013
Zm00001d011158	-2.29964
Zm00001d011160	-2.17363
Zm00001d011166	-2.78507
Zm00001d011168	-2.01189
Zm00001d011180	-2.15762
Zm00001d011183	-2.89083
Zm00001d011187	-2.29553
Zm00001d011188	-2.38453
Zm00001d011195	-2.96122
Zm00001d011202	-2.12971
Zm00001d011213	-2.01953
Zm00001d011217	-3.16214
Zm00001d011220	-2.60692
Zm00001d011223	-3.66221
Zm00001d011233	-2.43582
Zm00001d011252	-2.39917
Zm00001d011263	-2.45164
Zm00001d011266	-2.32563
Zm00001d011272	-3.45374
Zm00001d011282	-3.60508
Zm00001d011301	-5.42517
Zm00001d011311	-2.49228
Zm00001d011336	-4.53137
Zm00001d011349	-3.92058
Zm00001d011353	-2.3727
Zm00001d011355	-4.45492
Zm00001d011362	-2.49556
Zm00001d011365	-3.81749
Zm00001d011373	-2.73471
Zm00001d011401	-2.73329
Zm00001d011402	-4.10324
Zm00001d011405	-3.84021
Zm00001d011424	-3.24829
Zm00001d011426	-2.53088
Zm00001d011445	-2.06577
Zm00001d011450	-2.42517
Zm00001d011483	-4.17411
Zm00001d011490	-5.02607
Zm00001d011492	-3.90322
Zm00001d011500	-2.27317
Zm00001d011503	-3.17808
Zm00001d011512	-2.39458
Zm00001d011517	-2.81106
Zm00001d011519	-3.16214
Zm00001d011526	-2.81219
Zm00001d011530	-2.29964
Zm00001d011541	-2.58744
Zm00001d011543	-3.8991
Zm00001d011560	-2.30255
Zm00001d011561	-2.54065
Zm00001d011563	-2.6882
Zm00001d011572	-3.03285
Zm00001d011573	-2.55762
Zm00001d011578	-2.91702
Zm00001d011595	-2.81749
Zm00001d011601	-2.93974
Zm00001d011602	-2.20278
Zm00001d011603	-2.85813
Zm00001d011604	-2.40441
Zm00001d011638	-2.76982
Zm00001d011644	-3.01013
Zm00001d011652	-3.29964
Zm00001d011680	-2.97145
Zm00001d011696	-2.08813
Zm00001d011699	-2.55445
Zm00001d011700	-3.41223
Zm00001d011705	-3.84021
Zm00001d011707	-2.29964
Zm00001d011708	-4.5651
Zm00001d011716	-3.61781
Zm00001d011717	-2.93707
Zm00001d011720	-3.09813
Zm00001d011746	-2.50317
Zm00001d011750	-3.19776
Zm00001d011776	-2.0626
Zm00001d011791	-2.15762
Zm00001d011811	-2.37072
Zm00001d011830	-2.26054
Zm00001d011835	-2.04666
Zm00001d011850	-2.12971
Zm00001d011851	-3.12561
Zm00001d011854	-4.00567
Zm00001d011855	-2.16214
Zm00001d011873	-2.09913
Zm00001d011876	-3.4893
Zm00001d011877	-2.93707
Zm00001d011892	-2.65783
Zm00001d011900	-2.38008
Zm00001d011901	-2.35088
Zm00001d011913	-3.11323
Zm00001d011918	-3.07725
Zm00001d011929	-4.16214
Zm00001d011941	-2.30488
Zm00001d011953	-3.07349
Zm00001d011955	-2.39275
Zm00001d011966	-2.61781
Zm00001d011979	-2.42517
Zm00001d011983	-2.29964
Zm00001d011997	-4.04315
Zm00001d012005	-2.10324
Zm00001d012007	-3.0626
Zm00001d012017	-2.47962
Zm00001d012027	-4.81749
Zm00001d012028	-2.45818
Zm00001d012030	-2.41828
Zm00001d012033	-2.35478
Zm00001d012034	-5.46956
Zm00001d012036	-2.9251
Zm00001d012040	-2.27317
Zm00001d012041	-2.43898
Zm00001d012042	-2.15838
Zm00001d012044	-4.06903
Zm00001d012052	-2.07393
Zm00001d012061	-2.16214
Zm00001d012067	-4.31053
Zm00001d012069	-2.55445
Zm00001d012073	-2.64756
Zm00001d012074	-3.4507
Zm00001d012079	-2.00686
Zm00001d012085	-2.75859
Zm00001d012108	-2.04879
Zm00001d012118	-3.01013
Zm00001d012126	-2.09502
Zm00001d012142	-3.60125
Zm00001d012146	-2.68319
Zm00001d012168	-2.3966
Zm00001d012170	-3.49556
Zm00001d012175	-2.08052
Zm00001d012180	-3.27761
Zm00001d012195	-2.29338
Zm00001d012197	-2.38769
Zm00001d012198	-3.45688
Zm00001d012204	-2.12878
Zm00001d012211	-3.55445
Zm00001d012212	-3.7471
Zm00001d012213	-2.71468
Zm00001d012217	-2.33616
Zm00001d012219	-3.31825
Zm00001d012223	-2.04966
Zm00001d012232	-2.03018
Zm00001d012233	-3.7326
Zm00001d012260	-2.14388
Zm00001d012264	-6.89549
Zm00001d012269	-2.42517
Zm00001d012270	-3.71057
Zm00001d012273	-5.01458
Zm00001d012284	-2.15387
Zm00001d012286	-2.59509
Zm00001d012292	-3.50554
Zm00001d012295	-2.17998
Zm00001d012307	-2.34271
Zm00001d012312	-2.99221
Zm00001d012315	-3.01013
Zm00001d012328	-3.43183
Zm00001d012336	-4.77881
Zm00001d012361	-2.44309
Zm00001d012395	-2.08813
Zm00001d012397	-2.57717
Zm00001d012399	-2.78362
Zm00001d012422	-3.10324
Zm00001d012423	-2.46079
Zm00001d012425	-3.23252
Zm00001d012437	-2.90082
Zm00001d012439	-2.61781
Zm00001d012446	-2.96949
Zm00001d012510	-3.0626
Zm00001d012511	-2.25524
Zm00001d012512	-2.45164
Zm00001d012514	-2.45718
Zm00001d012516	-2.42517
Zm00001d012525	-2.57717
Zm00001d012537	-3.26167
Zm00001d012538	-3.18006
Zm00001d012544	-2.56267
Zm00001d012546	-3.78507
Zm00001d012557	-2.19358
Zm00001d012559	-4.60176
Zm00001d012560	-3.64756
Zm00001d012571	-4.45492
Zm00001d012578	-3.80648
Zm00001d012581	-3.78663
Zm00001d012590	-2.57717
Zm00001d012604	-2.58744
Zm00001d012618	-2.04966
Zm00001d012625	-2.82075
Zm00001d012627	-3.09259
Zm00001d012628	-3.6882
Zm00001d012629	-3.53208
Zm00001d012633	-2.26423
Zm00001d012634	-2.56267
Zm00001d012636	-2.76502
Zm00001d012640	-3.4647
Zm00001d012642	-2.54803
Zm00001d012643	-2.20278
Zm00001d012653	-3.87707
Zm00001d012654	-2.20944
Zm00001d012661	-2.51368
Zm00001d012662	-2.26905
Zm00001d012665	-3.35117
Zm00001d012667	-2.48406
Zm00001d012673	-3.14138
Zm00001d012694	-2.20944
Zm00001d012699	-3.38453
Zm00001d012701	-4.60574
Zm00001d012708	-2.53653
Zm00001d012728	-2.77309
Zm00001d012747	-2.49556
Zm00001d012749	-2.25524
Zm00001d012751	-2.64756
Zm00001d012760	-2.61781
Zm00001d012761	-2.24231
Zm00001d012765	-2.46115
Zm00001d012768	-5.31414
Zm00001d012775	-2.60776
Zm00001d012787	-2.42517
Zm00001d012794	-2.09655
Zm00001d012797	-4.54065
Zm00001d012801	-2.8846
Zm00001d012824	-2.0511
Zm00001d012849	-4.59509
Zm00001d012851	-2.12737
Zm00001d012853	-2.27317
Zm00001d012858	-2.95568
Zm00001d012861	-2.49556
Zm00001d012862	-2.57717
Zm00001d012863	-2.48406
Zm00001d012885	-2.28767
Zm00001d012886	-2.00964
Zm00001d012892	-2.97976
Zm00001d012893	-3.8991
Zm00001d012896	-2.46956
Zm00001d012898	-2.7326
Zm00001d012911	-2.10967
Zm00001d012914	-2.49883
Zm00001d012923	-3.56653
Zm00001d012930	-2.88013
Zm00001d012937	-5.10073
Zm00001d012938	-2.78868
Zm00001d012966	-2.43515
Zm00001d012969	-2.42517
Zm00001d012970	-3.13299
Zm00001d012974	-2.30969
Zm00001d012979	-2.34656
Zm00001d012984	-3.7471
Zm00001d012988	-2.00602
Zm00001d012991	-2.04184
Zm00001d012996	-2.54475
Zm00001d012997	-4.37937
Zm00001d013007	-2.25524
Zm00001d013020	-3.92767
Zm00001d013027	-2.24317
Zm00001d013033	-2.3948
Zm00001d013047	-2.23252
Zm00001d013049	-2.35478
Zm00001d013052	-2.47026
Zm00001d013057	-3.83199
Zm00001d013059	-4.96949
Zm00001d013061	-3.38453
Zm00001d013073	-2.16214
Zm00001d013086	-2.46115
Zm00001d013087	-2.64756
Zm00001d013090	-3.16214
Zm00001d013092	-2.92767
Zm00001d013093	-2.83505
Zm00001d013094	-2.52203
Zm00001d013101	-3.45688
Zm00001d013116	-3.01013
Zm00001d013119	-3.27761
Zm00001d013141	-2.64756
Zm00001d013153	-2.36377
Zm00001d013166	-2.03369
Zm00001d013182	-2.16214
Zm00001d013186	-2.35478
Zm00001d013190	-3.42517
Zm00001d013191	-2.45164
Zm00001d013195	-3.16214
Zm00001d013203	-2.17808
Zm00001d013211	-2.71468
Zm00001d013223	-3.6731
Zm00001d013234	-2.95124
Zm00001d013241	-2.0366
Zm00001d013247	-3.10073
Zm00001d013250	-2.0626
Zm00001d013253	-3.22035
Zm00001d013262	-2.52373
Zm00001d013271	-2.8991
Zm00001d013272	-2.42517
Zm00001d013274	-3.69487
Zm00001d013278	-3.09319
Zm00001d013301	-2.75066
Zm00001d013309	-3.7913
Zm00001d013314	-3.32047
Zm00001d013316	-2.34271
Zm00001d013325	-2.04666
Zm00001d013330	-2.24014
Zm00001d013331	-2.14769
Zm00001d013334	-3.02463
Zm00001d013351	-2.33616
Zm00001d013358	-2.16214
Zm00001d013360	-2.64756
Zm00001d013361	-3.71468
Zm00001d013364	-4.24014
Zm00001d013371	-2.24014
Zm00001d013380	-2.63162
Zm00001d013383	-2.31825
Zm00001d013389	-3.2001
Zm00001d013391	-4.22514
Zm00001d013405	-2.6424
Zm00001d013412	-4.84663
Zm00001d013415	-4.46956
Zm00001d013419	-2.13357
Zm00001d013420	-2.15064
Zm00001d013421	-3.6882
Zm00001d013428	-2.28664
Zm00001d013434	-2.56267
Zm00001d013435	-2.45688
Zm00001d013439	-3.76077
Zm00001d013440	-3.12971
Zm00001d013456	-3.97216
Zm00001d013468	-2.36377
Zm00001d013470	-2.37626
Zm00001d013488	-2.03285
Zm00001d013493	-2.47764
Zm00001d013512	-2.77881
Zm00001d013523	-3.63607
Zm00001d013529	-4.00008
Zm00001d013531	-2.81421
Zm00001d013533	-2.57161
Zm00001d013540	-2.41577
Zm00001d013541	-3.13566
Zm00001d013548	-2.10324
Zm00001d013555	-2.85485
Zm00001d013569	-5.36377
Zm00001d013575	-2.57717
Zm00001d013582	-2.00371
Zm00001d013588	-4.71795
Zm00001d013589	-2.32419
Zm00001d013598	-2.22278
Zm00001d013599	-2.29087
Zm00001d013609	-2.27559
Zm00001d013614	-2.50317
Zm00001d013626	-2.84021
Zm00001d013631	-3.21872
Zm00001d013642	-3.14138
Zm00001d013645	-2.77881
Zm00001d013651	-2.21872
Zm00001d013653	-4.40398
Zm00001d013667	-3.03459
Zm00001d013673	-2.07467
Zm00001d013680	-2.13299
Zm00001d013683	-3.25524
Zm00001d013692	-2.77881
Zm00001d013695	-2.31414
Zm00001d013700	-2.02413
Zm00001d013712	-5.04184
Zm00001d013738	-2.94454
Zm00001d013746	-2.16214
Zm00001d013747	-2.29964
Zm00001d013755	-2.39275
Zm00001d013757	-2.25524
Zm00001d013767	-3.16214
Zm00001d013780	-2.03285
Zm00001d013812	-2.42517
Zm00001d013821	-2.01013
Zm00001d013822	-2.7027
Zm00001d013824	-2.0626
Zm00001d013827	-2.67671
Zm00001d013828	-2.29867
Zm00001d013839	-2.16214
Zm00001d013840	-2.28413
Zm00001d013849	-3.0366
Zm00001d013859	-2.12455
Zm00001d013863	-2.66557
Zm00001d013874	-3.23252
Zm00001d013887	-2.57717
Zm00001d013891	-2.64756
Zm00001d013908	-2.81421
Zm00001d013910	-2.11705
Zm00001d013911	-2.51417
Zm00001d013958	-2.75532
Zm00001d013962	-2.17757
Zm00001d013963	-3.27317
Zm00001d013964	-2.14764
Zm00001d013971	-3.44754
Zm00001d013984	-3.34146
Zm00001d013985	-2.07725
Zm00001d013992	-2.75774
Zm00001d013993	-3.64756
Zm00001d013999	-2.20278
Zm00001d014000	-4.35478
Zm00001d014005	-2.92413
Zm00001d014007	-2.00631
Zm00001d014011	-3.4507
Zm00001d014030	-2.33497
Zm00001d014033	-2.01013
Zm00001d014035	-3.2496
Zm00001d014036	-3.2001
Zm00001d014037	-2.57717
Zm00001d014040	-3.37072
Zm00001d014073	-4.7471
Zm00001d014090	-2.30546
Zm00001d014108	-3.2001
Zm00001d014109	-4.6932
Zm00001d014116	-3.05863
Zm00001d014124	-2.70164
Zm00001d014133	-2.39275
Zm00001d014150	-2.14764
Zm00001d014187	-2.21872
Zm00001d014188	-3.17363
Zm00001d014190	-2.48406
Zm00001d014191	-4.0626
Zm00001d014192	-4.59509
Zm00001d014199	-3.6882
Zm00001d014246	-2.20278
Zm00001d014255	-3.43183
Zm00001d014261	-3.92058
Zm00001d014276	-3.6731
Zm00001d014278	-2.22103
Zm00001d014280	-4.62157
Zm00001d014286	-3.16214
Zm00001d014297	-5.08813
Zm00001d014300	-2.24829
Zm00001d014303	-2.84421
Zm00001d014311	-2.6268
Zm00001d014321	-3.20278
Zm00001d014324	-2.96949
Zm00001d014327	-2.83505
Zm00001d014337	-2.39542
Zm00001d014338	-2.85401
Zm00001d014340	-2.55641
Zm00001d014344	-2.47764
Zm00001d014361	-3.21658
Zm00001d014367	-2.29964
Zm00001d014368	-4.7471
Zm00001d014378	-3.29964
Zm00001d014413	-2.91173
Zm00001d014435	-2.57236
Zm00001d014442	-2.42517
Zm00001d014444	-2.01424
Zm00001d014445	-2.79957
Zm00001d014446	-2.9106
Zm00001d014458	-2.39602
Zm00001d014497	-2.07967
Zm00001d014499	-2.0626
Zm00001d014512	-2.4507
Zm00001d014516	-2.25524
Zm00001d014524	-2.01013
Zm00001d014525	-2.09175
Zm00001d014562	-4.28078
Zm00001d014568	-2.2001
Zm00001d014569	-2.77881
Zm00001d014575	-4.03285
Zm00001d014587	-2.12149
Zm00001d014595	-2.27317
Zm00001d014625	-2.72848
Zm00001d014626	-2.27107
Zm00001d014654	-2.9106
Zm00001d014655	-2.17004
Zm00001d014656	-3.0626
Zm00001d014665	-2.26523
Zm00001d014668	-2.30231
Zm00001d014669	-2.18813
Zm00001d014671	-2.5362
Zm00001d014672	-4.54065
Zm00001d014673	-3.57717
Zm00001d014679	-2.6882
Zm00001d014685	-2.04184
Zm00001d014705	-2.10324
Zm00001d014715	-2.6268
Zm00001d014719	-2.00602
Zm00001d014744	-2.45374
Zm00001d014753	-2.50317
Zm00001d014758	-3.7471
Zm00001d014761	-3.56267
Zm00001d014764	-2.91821
Zm00001d014772	-4.18006
Zm00001d014773	-2.32492
Zm00001d014778	-2.71468
Zm00001d014783	-2.0216
Zm00001d014786	-2.2534
Zm00001d014797	-2.92638
Zm00001d014802	-4.01013
Zm00001d014808	-3.35117
Zm00001d014809	-2.8846
Zm00001d014812	-3.26167
Zm00001d014862	-2.3821
Zm00001d014864	-2.30361
Zm00001d014865	-2.84021
Zm00001d014866	-4.29964
Zm00001d014868	-2.10007
Zm00001d014895	-2.24317
Zm00001d014900	-3.27317
Zm00001d014901	-3.8846
Zm00001d014909	-2.99221
Zm00001d014910	-2.6128
Zm00001d014912	-2.84021
Zm00001d014913	-4.36377
Zm00001d014924	-3.23252
Zm00001d014937	-2.97771
Zm00001d014950	-2.49402
Zm00001d014951	-3.24074
Zm00001d014966	-2.8991
Zm00001d014976	-2.47764
Zm00001d014977	-2.56361
Zm00001d014985	-2.56267
Zm00001d014990	-4.56267
Zm00001d014991	-2.64756
Zm00001d014992	-2.06527
Zm00001d015007	-2.39275
Zm00001d015012	-2.01013
Zm00001d015020	-3.27761
Zm00001d015025	-2.5651
Zm00001d015037	-2.6268
Zm00001d015053	-2.62109
Zm00001d015058	-4.28315
Zm00001d015065	-2.63376
Zm00001d015082	-2.13566
Zm00001d015083	-2.70528
Zm00001d015086	-2.55445
Zm00001d015096	-4.15762
Zm00001d015100	-2.24231
Zm00001d015115	-2.6731
Zm00001d015120	-2.27761
Zm00001d015124	-2.07238
Zm00001d015134	-3.45164
Zm00001d015148	-2.10724
Zm00001d015151	-6.62157
Zm00001d015156	-5.42517
Zm00001d015157	-3.80368
Zm00001d015174	-2.69582
Zm00001d015181	-2.84021
Zm00001d015194	-2.30278
Zm00001d015203	-5.0626
Zm00001d015204	-2.69602
Zm00001d015208	-3.65734
Zm00001d015227	-2.59509
Zm00001d015228	-3.57717
Zm00001d015242	-2.33073
Zm00001d015243	-2.07725
Zm00001d015248	-3.61865
Zm00001d015249	-2.29472
Zm00001d015256	-2.11323
Zm00001d015259	-2.43021
Zm00001d015265	-5.14764
Zm00001d015269	-2.3904
Zm00001d015289	-5.33206
Zm00001d015290	-3.23252
Zm00001d015293	-2.43515
Zm00001d015300	-3.12561
Zm00001d015301	-3.10073
Zm00001d015327	-2.07725
Zm00001d015328	-2.68709
Zm00001d015344	-3.17278
Zm00001d015354	-2.29964
Zm00001d015364	-2.70528
Zm00001d015366	-2.71468
Zm00001d015400	-3.87192
Zm00001d015410	-2.9579
Zm00001d015421	-2.81945
Zm00001d015427	-2.94873
Zm00001d015435	-3.01013
Zm00001d015446	-6.7471
Zm00001d015450	-2.97771
Zm00001d015473	-3.7471
Zm00001d015477	-2.29338
Zm00001d015484	-2.39275
Zm00001d015499	-2.02463
Zm00001d015505	-2.7471
Zm00001d015520	-2.70003
Zm00001d015567	-3.67028
Zm00001d015579	-2.09822
Zm00001d015589	-3.55445
Zm00001d015599	-3.41512
Zm00001d015603	-3.48791
Zm00001d015605	-2.8492
Zm00001d015612	-2.1907
Zm00001d015613	-3.41067
Zm00001d015614	-3.03988
Zm00001d015650	-3.23252
Zm00001d015690	-2.70018
Zm00001d015692	-3.2496
Zm00001d015703	-2.01013
Zm00001d015704	-4.39275
Zm00001d015714	-3.14138
Zm00001d015729	-2.31414
Zm00001d015747	-3.2001
Zm00001d015759	-2.43823
Zm00001d015765	-2.76982
Zm00001d015781	-3.45374
Zm00001d015784	-6.81749
Zm00001d015829	-2.6857
Zm00001d015837	-2.04879
Zm00001d015840	-3.49228
Zm00001d015853	-4.0366
Zm00001d015886	-4.81749
Zm00001d015890	-3.04184
Zm00001d015893	-2.1516
Zm00001d015948	-2.8708
Zm00001d015955	-2.04184
Zm00001d015962	-2.57356
Zm00001d015975	-2.14138
Zm00001d015999	-2.25852
Zm00001d016001	-3.12031
Zm00001d016002	-2.34271
Zm00001d016006	-3.31825
Zm00001d016034	-2.59509
Zm00001d016036	-3.75907
Zm00001d016041	-2.21367
Zm00001d016044	-5.23252
Zm00001d016049	-2.66618
Zm00001d016074	-3.78507
Zm00001d016075	-2.4767
Zm00001d016080	-2.9106
Zm00001d016084	-4.42517
Zm00001d016129	-2.40545
Zm00001d016142	-2.02607
Zm00001d016164	-4.23252
Zm00001d016165	-3.15274
Zm00001d016166	-2.69819
Zm00001d016182	-2.91821
Zm00001d016183	-2.25782
Zm00001d016198	-2.74067
Zm00001d016252	-2.49625
Zm00001d016273	-5.03988
Zm00001d016277	-2.7471
Zm00001d016285	-5.06903
Zm00001d016286	-2.21177
Zm00001d016312	-2.22723
Zm00001d016322	-3.1103
Zm00001d016325	-6.33206
Zm00001d016326	-2.59865
Zm00001d016365	-2.43515
Zm00001d016371	-2.27317
Zm00001d016378	-3.92767
Zm00001d016397	-2.16214
Zm00001d016402	-3.64756
Zm00001d016407	-2.33799
Zm00001d016439	-2.3678
Zm00001d016452	-2.72401
Zm00001d016453	-6.33206
Zm00001d016458	-2.6882
Zm00001d016463	-2.19044
Zm00001d016487	-2.0626
Zm00001d016491	-2.10324
Zm00001d016506	-4.64756
Zm00001d016512	-3.19384
Zm00001d016516	-3.45688
Zm00001d016518	-2.15129
Zm00001d016543	-2.57717
Zm00001d016559	-2.97266
Zm00001d016581	-2.56267
Zm00001d016585	-2.11413
Zm00001d016595	-2.37626
Zm00001d016615	-2.99419
Zm00001d016649	-2.32563
Zm00001d016674	-2.86257
Zm00001d016682	-3.03988
Zm00001d016695	-2.09175
Zm00001d016696	-4.6882
Zm00001d016707	-2.8991
Zm00001d016732	-2.1009
Zm00001d016755	-2.23252
Zm00001d016772	-2.60574
Zm00001d016783	-3.36377
Zm00001d016784	-2.19866
Zm00001d016787	-3.31414
Zm00001d016793	-2.259
Zm00001d016797	-2.05453
Zm00001d016804	-3.17687
Zm00001d016815	-3.29964
Zm00001d016817	-2.27874
Zm00001d016822	-2.48175
Zm00001d016827	-3.10324
Zm00001d016835	-6.10699
Zm00001d016838	-2.16214
Zm00001d016846	-2.5362
Zm00001d016855	-2.39758
Zm00001d016856	-3.51828
Zm00001d016858	-2.71468
Zm00001d016861	-3.96949
Zm00001d016890	-2.02607
Zm00001d016894	-2.14072
Zm00001d016897	-3.32492
Zm00001d016900	-2.93707
Zm00001d016913	-5.14764
Zm00001d016924	-2.13566
Zm00001d016926	-2.29964
Zm00001d016928	-2.40364
Zm00001d016958	-3.31414
Zm00001d016974	-4.18361
Zm00001d016979	-2.59311
Zm00001d016982	-2.28499
Zm00001d016990	-2.24014
Zm00001d016991	-3.54803
Zm00001d016996	-4.8066
Zm00001d017036	-2.26871
Zm00001d017042	-2.23252
Zm00001d017050	-3.48406
Zm00001d017053	-5.16214
Zm00001d017085	-2.16214
Zm00001d017086	-3.96949
Zm00001d017096	-2.18813
Zm00001d017106	-4.33067
Zm00001d017119	-3.69265
Zm00001d017120	-2.82813
Zm00001d017128	-2.37245
Zm00001d017139	-2.46314
Zm00001d017157	-2.38864
Zm00001d017164	-2.0626
Zm00001d017175	-2.16214
Zm00001d017186	-2.2446
Zm00001d017187	-2.82571
Zm00001d017190	-2.1009
Zm00001d017195	-2.81421
Zm00001d017203	-2.12971
Zm00001d017206	-3.81421
Zm00001d017213	-2.22925
Zm00001d017215	-2.27317
Zm00001d017238	-3.2446
Zm00001d017242	-2.34962
Zm00001d017253	-2.0564
Zm00001d017258	-2.10324
Zm00001d017290	-2.38453
Zm00001d017303	-2.1907
Zm00001d017323	-3.56267
Zm00001d017330	-2.12031
Zm00001d017333	-2.29964
Zm00001d017334	-2.42517
Zm00001d017337	-2.01953
Zm00001d017351	-3.29024
Zm00001d017361	-3.52203
Zm00001d017372	-3.23252
Zm00001d017379	-2.31515
Zm00001d017392	-2.86574
Zm00001d017396	-2.03216
Zm00001d017401	-3.59509
Zm00001d017417	-4.16214
Zm00001d017427	-2.50317
Zm00001d017435	-3.79957
Zm00001d017445	-2.0134
Zm00001d017456	-2.32563
Zm00001d017469	-2.7471
Zm00001d017476	-3.29964
Zm00001d017500	-3.01013
Zm00001d017522	-2.33771
Zm00001d017525	-2.22514
Zm00001d017547	-2.16214
Zm00001d017551	-2.06004
Zm00001d017574	-2.58867
Zm00001d017583	-2.48021
Zm00001d017584	-2.16214
Zm00001d017609	-3.18361
Zm00001d017641	-2.7471
Zm00001d017652	-3.96949
Zm00001d017654	-4.20278
Zm00001d017656	-4.10324
Zm00001d017676	-2.44507
Zm00001d017700	-2.48867
Zm00001d017704	-2.26722
Zm00001d017717	-2.36377
Zm00001d017719	-2.25114
Zm00001d017727	-4.31414
Zm00001d017742	-3.16214
Zm00001d017751	-2.39839
Zm00001d017752	-2.92524
Zm00001d017754	-2.8251
Zm00001d017766	-5.28315
Zm00001d017767	-2.93332
Zm00001d017771	-2.64756
Zm00001d017790	-2.01013
Zm00001d017791	-3.6882
Zm00001d017798	-3.38864
Zm00001d017809	-2.42517
Zm00001d017812	-2.29338
Zm00001d017817	-2.50317
Zm00001d017818	-2.88984
Zm00001d017824	-3.4647
Zm00001d017829	-2.73329
Zm00001d017832	-3.16214
Zm00001d017837	-3.15006
Zm00001d017840	-2.34028
Zm00001d017841	-2.95172
Zm00001d017846	-2.50127
Zm00001d017847	-4.68709
Zm00001d017848	-2.54855
Zm00001d017859	-2.07725
Zm00001d017868	-2.29338
Zm00001d017876	-2.85813
Zm00001d017882	-2.28078
Zm00001d017883	-4.33206
Zm00001d017887	-2.04248
Zm00001d017888	-3.51577
Zm00001d017889	-2.57717
Zm00001d017897	-2.29964
Zm00001d017900	-4.58795
Zm00001d017905	-4.13566
Zm00001d017925	-3.01013
Zm00001d017940	-5.51263
Zm00001d017946	-2.64756
Zm00001d017958	-3.09117
Zm00001d017961	-4.05744
Zm00001d017962	-2.42517
Zm00001d017966	-2.23252
Zm00001d017967	-2.16214
Zm00001d017977	-3.51263
Zm00001d017979	-3.23252
Zm00001d017982	-2.95568
Zm00001d017995	-4.42517
Zm00001d017997	-4.91702
Zm00001d018004	-3.49556
Zm00001d018009	-2.13566
Zm00001d018013	-2.31767
Zm00001d018016	-2.57939
Zm00001d018022	-2.9886
Zm00001d018024	-2.39275
Zm00001d018025	-2.32563
Zm00001d018027	-2.74067
Zm00001d018031	-2.21718
Zm00001d018042	-2.59509
Zm00001d018046	-2.3907
Zm00001d018057	-5.03815
Zm00001d018059	-2.10967
Zm00001d018060	-2.14233
Zm00001d018070	-2.23228
Zm00001d018085	-3.70528
Zm00001d018086	-2.20278
Zm00001d018096	-4.08813
Zm00001d018102	-5.59509
Zm00001d018113	-2.16583
Zm00001d018124	-2.92531
Zm00001d018133	-2.31053
Zm00001d018134	-2.87955
Zm00001d018142	-2.15387
Zm00001d018145	-2.08205
Zm00001d018146	-2.51577
Zm00001d018148	-2.18486
Zm00001d018155	-2.58915
Zm00001d018156	-2.30255
Zm00001d018161	-2.35478
Zm00001d018177	-5.16214
Zm00001d018179	-3.66221
Zm00001d018185	-3.0626
Zm00001d018193	-2.0532
Zm00001d018195	-2.56891
Zm00001d018197	-3.19384
Zm00001d018199	-2.81421
Zm00001d018206	-2.31053
Zm00001d018218	-2.2864
Zm00001d018219	-2.65148
Zm00001d018225	-4.32563
Zm00001d018226	-2.21959
Zm00001d018230	-2.54475
Zm00001d018234	-3.77567
Zm00001d018238	-2.98038
Zm00001d018243	-2.84021
Zm00001d018244	-2.84021
Zm00001d018246	-3.84021
Zm00001d018255	-2.65504
Zm00001d018258	-3.35622
Zm00001d018261	-2.19722
Zm00001d018262	-2.23876
Zm00001d018267	-2.79927
Zm00001d018274	-2.151
Zm00001d018275	-2.70415
Zm00001d018276	-2.57717
Zm00001d018286	-2.9106
Zm00001d018287	-2.45164
Zm00001d018294	-2.45164
Zm00001d018306	-2.04184
Zm00001d018330	-2.41624
Zm00001d018333	-2.39275
Zm00001d018334	-2.20433
Zm00001d018338	-2.51263
Zm00001d018339	-2.57627
Zm00001d018349	-3.29964
Zm00001d018361	-2.19456
Zm00001d018362	-2.68288
Zm00001d018369	-2.42517
Zm00001d018370	-2.67671
Zm00001d018372	-2.0366
Zm00001d018379	-2.64756
Zm00001d018382	-2.32831
Zm00001d018386	-2.25524
Zm00001d018392	-2.42517
Zm00001d018401	-2.11323
Zm00001d018407	-5.14138
Zm00001d018419	-3.43515
Zm00001d018420	-2.10324
Zm00001d018421	-2.16214
Zm00001d018424	-2.50317
Zm00001d018428	-2.14352
Zm00001d018432	-3.17278
Zm00001d018441	-4.57356
Zm00001d018450	-2.97771
Zm00001d018453	-4.30969
Zm00001d018454	-4.45164
Zm00001d018468	-2.67671
Zm00001d018472	-5.10967
Zm00001d018481	-2.09655
Zm00001d018484	-3.34271
Zm00001d018487	-3.48406
Zm00001d018488	-2.09175
Zm00001d018489	-2.00721
Zm00001d018496	-3.25524
Zm00001d018499	-2.43582
Zm00001d018502	-3.15732
Zm00001d018503	-2.25114
Zm00001d018514	-2.87974
Zm00001d018525	-3.81749
Zm00001d018535	-2.4239
Zm00001d018544	-4.02012
[truncated: 4,923 more rows]

## Sheet: OE3
geneId	log2foldchange>2
ENSRNA049440843	2.17873
ENSRNA049444172	2.10678
ENSRNA049445160	2.25785
ENSRNA049445166	3.23231
ENSRNA049447583	5.76481
ENSRNA049447995	3.19579
ENSRNA049450397	2.69175
ENSRNA049450511	2.24429
ENSRNA049451230	2.1591
ENSRNA049451307	3.40985
ENSRNA049456343	2.02961
ENSRNA049457014	2.26033
ENSRNA049457777	3.70263
ENSRNA049460114	2.44733
ENSRNA049460546	2.1392
ENSRNA049460809	2.67289
ENSRNA049461441	3.85402
ENSRNA049470263	2.44548
ENSRNA049470850	2.10678
ENSRNA049471037	2.46935
ENSRNA049472261	2.76069
ENSRNA049472528	2.02982
ENSRNA049472552	2.67341
ENSRNA049472641	2.45882
ENSRNA049474470	2.16722
ENSRNA049474599	2.25024
ENSRNA049474764	2.48865
ENSRNA049474953	3.62136
ENSRNA049476276	3.40224
ENSRNA049476908	4.09291
ENSRNA049477141	2.62463
ENSRNA049477509	2.17091
ENSRNA049479219	2.10678
ENSRNA049479501	3.17985
ENSRNA049997124	2.52182
ENSRNA049997182	2.02586
ENSRNA049997422	2.80722
ENSRNA049997537	3.27671
Zm00001d000002	2.44288
Zm00001d000005	3.33185
Zm00001d000030	2.49653
Zm00001d000039	2.29582
Zm00001d000040	2.20995
Zm00001d000041	2.96928
Zm00001d000042	2.1652
Zm00001d000072	2.48024
Zm00001d000074	2.55424
Zm00001d000098	2.38843
Zm00001d000099	3.26533
Zm00001d000102	2.50757
Zm00001d000120	2.01848
Zm00001d000123	2.29121
Zm00001d000124	2.22082
Zm00001d000150	2.40634
Zm00001d000153	2.65634
Zm00001d000169	2.45471
Zm00001d000178	2.98077
Zm00001d000186	2.39827
Zm00001d000191	2.8052
Zm00001d000202	2.26474
Zm00001d000205	2.96928
Zm00001d000212	2.60509
Zm00001d000222	2.07704
Zm00001d000226	4.3616
Zm00001d000229	4.95478
Zm00001d000240	4.73481
Zm00001d000241	2.11074
Zm00001d000257	2.74689
Zm00001d000312	2.57655
Zm00001d000316	3.19167
Zm00001d000346	4.58281
Zm00001d000361	3.01891
Zm00001d000362	2.79789
Zm00001d000412	2.09942
Zm00001d000419	3.48024
Zm00001d000432	2.1254
Zm00001d000487	2.1392
Zm00001d000510	2.64735
Zm00001d000518	2.43395
Zm00001d000550	2.21112
Zm00001d000552	2.22024
Zm00001d000556	2.37982
Zm00001d000560	2.38759
Zm00001d000623	3.10678
Zm00001d000627	3.00099
Zm00001d000665	2.57661
Zm00001d000667	2.16192
Zm00001d000684	2.09774
Zm00001d000708	2.77134
Zm00001d000710	3.63441
Zm00001d000727	2.10678
Zm00001d000738	3.19167
Zm00001d000771	3.57757
Zm00001d000773	2.38864
Zm00001d000778	2.69175
Zm00001d000806	2.0652
Zm00001d000859	2.1834
Zm00001d000866	2.7899
Zm00001d000867	2.24826
Zm00001d000880	3.06169
Zm00001d000903	3.81861
Zm00001d000976	3.45471
Zm00001d000990	2.43395
Zm00001d000998	3.55424
Zm00001d001021	2.35784
Zm00001d001024	2.66527
Zm00001d001042	2.88682
Zm00001d001065	2.61083
Zm00001d001082	2.23803
Zm00001d001168	2.37916
Zm00001d001180	2.00725
Zm00001d001239	2.06437
Zm00001d001245	2.09029
Zm00001d001251	2.31204
Zm00001d001266	3.45049
Zm00001d001269	2.1746
Zm00001d001284	3.58281
Zm00001d001285	3.34084
Zm00001d001327	2.32542
Zm00001d001348	2.43395
Zm00001d001353	2.59488
Zm00001d001356	2.7637
Zm00001d001362	2.42085
Zm00001d001408	3.16777
Zm00001d001412	2.06881
Zm00001d001447	3.49535
Zm00001d001465	3.13545
Zm00001d001480	2.17985
Zm00001d001482	3.10678
Zm00001d001493	3.62463
Zm00001d001505	2.19579
Zm00001d001528	3.14985
Zm00001d001542	2.16305
Zm00001d001554	2.5251
Zm00001d001591	2.38759
Zm00001d001620	4.3027
Zm00001d001625	2.42669
Zm00001d001645	3.32049
Zm00001d001651	2.89363
Zm00001d001652	2.34552
Zm00001d001673	3.40224
Zm00001d001678	2.46935
Zm00001d001691	3.09738
Zm00001d001757	2.76069
Zm00001d001765	2.12128
Zm00001d001775	2.88439
Zm00001d001780	2.3191
Zm00001d001786	2.11273
Zm00001d001787	2.02432
Zm00001d001788	2.84375
Zm00001d001797	2.96928
Zm00001d001798	2.49381
Zm00001d001800	5.55424
Zm00001d001807	2.96567
Zm00001d001810	2.18227
Zm00001d001824	3.01659
Zm00001d001829	2.23231
Zm00001d001830	2.32132
Zm00001d001834	2.14054
Zm00001d001839	2.95478
Zm00001d001846	3.48529
Zm00001d001851	3.32824
Zm00001d001858	2.00937
Zm00001d001859	2.29943
Zm00001d001871	3.47779
Zm00001d001910	2.80508
Zm00001d001923	2.95875
Zm00001d001929	2.81728
Zm00001d001933	2.70108
Zm00001d001939	2.44177
Zm00001d001940	3.17091
Zm00001d001947	2.70875
Zm00001d001959	2.6809
Zm00001d001965	2.03967
Zm00001d001966	2.21029
Zm00001d001967	2.59565
Zm00001d001970	2.64993
Zm00001d001983	2.09412
Zm00001d001990	2.53974
Zm00001d001993	2.97452
Zm00001d002006	2.01891
Zm00001d002052	2.46935
Zm00001d002053	2.13278
Zm00001d002056	3.03967
Zm00001d002068	4.1556
Zm00001d002074	2.39331
Zm00001d002086	2.3356
Zm00001d002089	3.3616
Zm00001d002090	2.75778
Zm00001d002098	3.45471
Zm00001d002099	3.50533
Zm00001d002105	2.37527
Zm00001d002111	2.55424
Zm00001d002119	2.00675
Zm00001d002123	2.81728
Zm00001d002124	6.40224
Zm00001d002128	3.31323
Zm00001d002130	3.91414
Zm00001d002131	2.3027
Zm00001d002132	4.55424
Zm00001d002134	2.47332
Zm00001d002135	2.86236
Zm00001d002143	2.14575
Zm00001d002146	2.55424
Zm00001d002150	2.26325
Zm00001d002163	3.37736
Zm00001d002164	4.03967
Zm00001d002191	2.81728
Zm00001d002204	2.0051
Zm00001d002216	3.82103
Zm00001d002235	2.12035
Zm00001d002247	2.31335
Zm00001d002250	3.01522
Zm00001d002256	3.80924
Zm00001d002266	2.23231
Zm00001d002271	2.26474
Zm00001d002288	3.49284
Zm00001d002295	2.70624
Zm00001d002301	4.69175
Zm00001d002302	2.17091
Zm00001d002309	3.29121
Zm00001d002311	2.89528
Zm00001d002312	2.20632
Zm00001d002313	2.9872
Zm00001d002316	2.58483
Zm00001d002326	2.25636
Zm00001d002332	3.65698
Zm00001d002334	2.03341
Zm00001d002342	2.08031
Zm00001d002346	2.19871
Zm00001d002356	3.77663
Zm00001d002360	2.59488
Zm00001d002364	2.69654
Zm00001d002382	2.69466
Zm00001d002385	2.32292
Zm00001d002389	2.09968
Zm00001d002406	2.5136
Zm00001d002416	3.11006
Zm00001d002420	2.68883
Zm00001d002437	3.1254
Zm00001d002444	2.10946
Zm00001d002475	2.91039
Zm00001d002490	2.89528
Zm00001d002538	2.96928
Zm00001d002540	2.89528
Zm00001d002553	2.97185
Zm00001d002564	2.43188
Zm00001d002599	2.02432
Zm00001d002603	2.42427
Zm00001d002610	2.84642
Zm00001d002614	3.23231
Zm00001d002617	3.01991
Zm00001d002624	2.3027
Zm00001d002650	2.0132
Zm00001d002682	3.0652
Zm00001d002715	2.99131
Zm00001d002731	2.73239
Zm00001d002734	2.42727
Zm00001d002744	4.48024
Zm00001d002791	3.1254
Zm00001d002796	3.10678
Zm00001d002797	2.87934
Zm00001d002817	3.1392
Zm00001d002819	2.08697
Zm00001d002823	4.61083
Zm00001d002827	6.2876
Zm00001d002843	3.15831
Zm00001d002857	2.16337
Zm00001d002868	3.3616
Zm00001d002869	2.24669
Zm00001d002873	2.09214
Zm00001d002880	2.27117
Zm00001d002889	3.54868
Zm00001d002890	2.09214
Zm00001d002893	3.45471
Zm00001d002919	2.25785
Zm00001d002933	4.99076
Zm00001d002936	3.31204
Zm00001d002939	2.40795
Zm00001d002954	3.76213
Zm00001d002960	2.46935
Zm00001d002962	2.06476
Zm00001d002963	2.07253
Zm00001d002964	3.3027
Zm00001d002967	2.36783
Zm00001d002978	2.22409
Zm00001d003002	2.54371
Zm00001d003004	2.03639
Zm00001d003010	2.32292
Zm00001d003025	2.70263
Zm00001d003032	2.55424
Zm00001d003048	2.01659
Zm00001d003059	2.60577
Zm00001d003075	2.07264
Zm00001d003076	2.39459
Zm00001d003081	2.67592
Zm00001d003083	2.3027
Zm00001d003084	2.47855
Zm00001d003104	2.81728
Zm00001d003106	3.28934
Zm00001d003118	2.13278
Zm00001d003148	2.04163
Zm00001d003166	2.0652
Zm00001d003167	2.02878
Zm00001d003176	2.6373
Zm00001d003181	2.91414
Zm00001d003198	2.17573
Zm00001d003203	2.46935
Zm00001d003214	2.40042
Zm00001d003226	2.59488
Zm00001d003227	2.86564
Zm00001d003247	2.0132
Zm00001d003251	2.1392
Zm00001d003254	2.20257
Zm00001d003259	2.34577
Zm00001d003265	2.1652
Zm00001d003277	2.89528
Zm00001d003281	2.62659
Zm00001d003352	2.4759
Zm00001d003369	2.92419
Zm00001d003374	2.18723
Zm00001d003377	2.01932
Zm00001d003382	2.32164
Zm00001d003396	2.44548
Zm00001d003401	3.15515
Zm00001d003411	2.31978
Zm00001d003427	2.96928
Zm00001d003428	2.3027
Zm00001d003445	3.48385
Zm00001d003460	2.62136
Zm00001d003463	2.22024
Zm00001d003491	3.48024
Zm00001d003502	3.40668
Zm00001d003516	4.48024
Zm00001d003517	3.19579
Zm00001d003525	2.71774
Zm00001d003540	2.1254
Zm00001d003559	2.73481
Zm00001d003598	3.23231
Zm00001d003602	2.71241
Zm00001d003613	2.66527
Zm00001d003643	3.99785
Zm00001d003644	2.08392
Zm00001d003654	2.12974
Zm00001d003655	2.35333
Zm00001d003656	3.10052
Zm00001d003659	2.42496
Zm00001d003667	2.15515
Zm00001d003672	4.22409
Zm00001d003675	2.74328
Zm00001d003685	3.44321
Zm00001d003778	2.15358
Zm00001d003786	2.10678
Zm00001d003793	2.44288
Zm00001d003813	3.71774
Zm00001d003847	2.87302
Zm00001d003857	2.29644
Zm00001d003879	2.30199
Zm00001d003904	3.48024
Zm00001d003922	2.93686
Zm00001d003928	3.99165
Zm00001d003935	2.34779
Zm00001d004012	2.21029
Zm00001d004053	2.00381
Zm00001d004055	2.15139
Zm00001d004091	2.67977
Zm00001d004118	3.0314
Zm00001d004119	2.46644
Zm00001d004120	2.00725
Zm00001d004125	2.35595
Zm00001d004132	2.40406
Zm00001d004136	2.82019
Zm00001d004139	3.36094
Zm00001d004141	2.55424
Zm00001d004152	2.61083
Zm00001d004154	4.90474
Zm00001d004155	3.23231
Zm00001d004159	2.63224
Zm00001d004172	2.1254
Zm00001d004176	2.99527
Zm00001d004190	2.23874
Zm00001d004196	2.19915
Zm00001d004200	2.19595
Zm00001d004215	3.56889
Zm00001d004222	2.03275
Zm00001d004259	2.25338
Zm00001d004260	2.0314
Zm00001d004270	2.48209
Zm00001d004300	4.63516
Zm00001d004354	2.57335
Zm00001d004361	2.3027
Zm00001d004383	2.47624
Zm00001d004386	2.30948
Zm00001d004407	2.19049
Zm00001d004409	2.87263
Zm00001d004435	2.05174
Zm00001d004437	3.69175
Zm00001d004438	3.60387
Zm00001d004442	4.66527
Zm00001d004458	2.01659
Zm00001d004463	3.10678
Zm00001d004465	2.31032
Zm00001d004482	4.43876
Zm00001d004517	2.06239
Zm00001d004521	2.14929
Zm00001d004551	2.11984
Zm00001d004568	3.56323
Zm00001d004573	2.77288
Zm00001d004585	3.69175
Zm00001d004626	2.69175
Zm00001d004640	2.53271
Zm00001d004651	2.12338
Zm00001d004655	2.58024
Zm00001d004659	2.96928
Zm00001d004667	2.91039
Zm00001d004702	2.3616
Zm00001d004707	2.84702
Zm00001d004739	2.19167
Zm00001d004751	2.51839
Zm00001d004771	2.21781
Zm00001d004779	2.20584
Zm00001d004782	2.95721
Zm00001d004784	3.40224
Zm00001d004785	2.3027
Zm00001d004791	3.93275
Zm00001d004815	2.81728
Zm00001d004837	2.45471
Zm00001d004851	2.3027
Zm00001d004856	2.6367
Zm00001d004861	2.26533
Zm00001d004894	2.10107
Zm00001d004896	2.01767
Zm00001d004925	2.32703
Zm00001d004933	2.30538
Zm00001d004956	2.2629
Zm00001d004960	2.57781
Zm00001d004978	2.0061
Zm00001d004979	2.69175
Zm00001d004983	2.9872
Zm00001d004986	2.00992
Zm00001d005007	2.13278
Zm00001d005019	2.75016
Zm00001d005027	2.14538
Zm00001d005063	2.03068
Zm00001d005065	2.1392
Zm00001d005083	2.46935
Zm00001d005090	2.14469
Zm00001d005105	3.58281
Zm00001d005108	2.06043
Zm00001d005127	2.23231
Zm00001d005135	4.01367
Zm00001d005137	3.25879
Zm00001d005144	2.87617
Zm00001d005151	3.57627
Zm00001d005157	2.85792
Zm00001d005159	2.08031
Zm00001d005164	2.45471
Zm00001d005168	3.35784
Zm00001d005173	2.34335
Zm00001d005178	2.61083
Zm00001d005179	3.40224
Zm00001d005199	2.98839
Zm00001d005228	2.68964
Zm00001d005238	2.0314
Zm00001d005256	3.01659
Zm00001d005257	3.20317
Zm00001d005261	2.62659
Zm00001d005269	3.74328
Zm00001d005270	2.20959
Zm00001d005295	6.17091
Zm00001d005297	2.68688
Zm00001d005317	3.3027
Zm00001d005346	2.05174
Zm00001d005348	3.37636
Zm00001d005402	4.36982
Zm00001d005403	2.11684
Zm00001d005441	3.87617
Zm00001d005444	3.10559
Zm00001d005451	2.08323
Zm00001d005453	2.57216
Zm00001d005455	2.73239
Zm00001d005462	2.17745
Zm00001d005466	2.14762
Zm00001d005473	3.423
Zm00001d005495	2.57235
Zm00001d005502	2.03794
Zm00001d005507	2.50795
Zm00001d005536	5.20632
Zm00001d005546	2.62463
Zm00001d005547	2.8591
Zm00001d005563	2.04555
Zm00001d005573	2.45471
Zm00001d005584	2.06239
Zm00001d005586	4.48024
Zm00001d005587	2.51242
Zm00001d005638	2.41818
Zm00001d005647	2.00992
Zm00001d005650	2.04234
Zm00001d005671	3.59221
Zm00001d005680	2.70709
Zm00001d005682	2.04234
Zm00001d005687	2.13155
Zm00001d005697	2.8568
Zm00001d005754	3.23231
Zm00001d005762	2.49423
Zm00001d005764	2.10678
Zm00001d005765	2.4058
Zm00001d005779	2.06881
Zm00001d005782	2.22024
Zm00001d005804	2.26979
Zm00001d005807	2.51242
Zm00001d005808	2.68549
Zm00001d005811	2.87172
Zm00001d005812	2.60387
Zm00001d005813	2.1392
Zm00001d005824	2.42609
Zm00001d005826	4.32918
Zm00001d005828	2.76837
Zm00001d005843	2.02373
Zm00001d005852	2.1392
Zm00001d005867	3.62463
Zm00001d005902	2.74689
Zm00001d005948	3.49535
Zm00001d005964	3.37138
Zm00001d005995	2.3027
Zm00001d006010	2.00725
Zm00001d006011	2.4089
Zm00001d006025	2.33185
Zm00001d006026	2.51242
Zm00001d006030	2.05174
Zm00001d006035	2.0017
Zm00001d006040	2.06881
Zm00001d006044	3.74011
Zm00001d006046	3.40224
Zm00001d006061	3.66527
Zm00001d006085	3.18911
Zm00001d006113	2.60155
Zm00001d006128	2.10678
Zm00001d006131	2.66116
Zm00001d006148	3.38071
Zm00001d006162	5.29601
Zm00001d006167	2.12189
Zm00001d006168	2.40224
Zm00001d006170	5.03967
Zm00001d006178	2.45471
Zm00001d006183	2.07463
Zm00001d006214	3.11767
Zm00001d006232	2.10756
Zm00001d006242	2.55424
Zm00001d006244	2.64735
Zm00001d006246	3.1254
Zm00001d006250	2.10678
Zm00001d006276	2.55424
Zm00001d006297	2.41289
Zm00001d006319	2.70624
Zm00001d006322	3.23231
Zm00001d006323	2.0514
Zm00001d006343	2.75016
Zm00001d006357	2.40224
Zm00001d006364	2.42197
Zm00001d006370	2.58716
Zm00001d006372	2.47743
Zm00001d006382	2.03967
Zm00001d006397	2.65063
Zm00001d006403	2.10268
Zm00001d006415	2.00807
Zm00001d006419	4.58483
Zm00001d006421	2.25785
Zm00001d006422	2.23623
Zm00001d006428	2.03967
Zm00001d006430	2.23632
Zm00001d006438	2.99698
Zm00001d006439	2.39812
Zm00001d006440	2.6972
Zm00001d006445	4.31978
Zm00001d006450	2.31032
Zm00001d006458	2.03967
Zm00001d006470	2.98077
Zm00001d006472	3.7263
Zm00001d006479	2.66938
Zm00001d006496	2.29121
Zm00001d006499	2.31978
Zm00001d006508	2.40224
Zm00001d006521	2.13683
Zm00001d006541	2.61083
Zm00001d006555	2.07046
Zm00001d006565	2.06169
Zm00001d006566	2.71976
Zm00001d006567	2.86862
Zm00001d006578	2.78485
Zm00001d006582	2.50915
Zm00001d006591	2.41712
Zm00001d006596	2.53974
Zm00001d006606	2.2488
Zm00001d006623	2.31478
Zm00001d006640	2.53974
Zm00001d006645	2.46935
Zm00001d006659	2.21029
Zm00001d006673	3.25498
Zm00001d006676	2.4991
Zm00001d006677	2.03967
Zm00001d006681	6.15515
Zm00001d006701	2.52825
Zm00001d006711	2.03021
Zm00001d006748	2.0017
Zm00001d006753	2.94281
Zm00001d006758	2.03967
Zm00001d006763	4.04538
Zm00001d006769	3.05432
Zm00001d006780	2.86564
Zm00001d006788	2.3767
Zm00001d006789	2.58483
Zm00001d006790	2.60577
Zm00001d006791	2.17602
Zm00001d006797	2.56621
Zm00001d006798	2.55424
Zm00001d006799	2.91681
Zm00001d006823	2.19009
Zm00001d006834	2.50915
Zm00001d006837	2.17882
Zm00001d006839	2.51772
Zm00001d006856	2.03451
Zm00001d006858	3.78836
Zm00001d006884	3.23231
Zm00001d006903	2.08031
Zm00001d006927	2.93275
Zm00001d006929	2.11649
Zm00001d006939	2.57335
Zm00001d006948	2.5251
Zm00001d007009	2.81728
Zm00001d007015	2.13043
Zm00001d007028	2.49535
Zm00001d007029	3.15831
Zm00001d007038	2.88205
Zm00001d007045	3.24612
Zm00001d007047	2.50985
Zm00001d007048	2.17547
Zm00001d007056	2.90765
Zm00001d007065	2.15925
Zm00001d007080	3.08476
Zm00001d007081	2.00449
Zm00001d007089	2.77219
Zm00001d007112	2.1507
Zm00001d007125	2.03598
Zm00001d007139	2.12213
Zm00001d007146	3.56935
Zm00001d007193	3.27938
Zm00001d007195	5.96928
Zm00001d007200	3.19579
Zm00001d007202	2.03967
Zm00001d007204	2.20959
Zm00001d007214	5.22024
Zm00001d007226	2.59649
Zm00001d007240	2.12376
Zm00001d007241	2.2432
Zm00001d007256	2.00005
Zm00001d007288	2.21156
Zm00001d007294	2.09625
Zm00001d007296	2.17985
Zm00001d007300	2.96928
Zm00001d007301	2.02081
Zm00001d007313	3.19167
Zm00001d007357	2.33185
Zm00001d007366	2.39737
Zm00001d007383	2.72417
Zm00001d007388	2.88141
Zm00001d007422	2.40224
Zm00001d007423	2.11878
Zm00001d007435	3.00675
Zm00001d007441	3.19948
Zm00001d007455	2.34779
Zm00001d007457	2.24309
Zm00001d007493	2.74862
Zm00001d007501	2.19167
Zm00001d007509	4.72417
Zm00001d007517	2.45773
Zm00001d007518	3.96928
Zm00001d007528	2.62463
Zm00001d007530	2.84899
Zm00001d007540	2.35784
Zm00001d007585	4.62463
Zm00001d007600	3.26402
Zm00001d007605	2.25879
Zm00001d007630	2.23231
Zm00001d007638	2.5144
Zm00001d007641	2.0502
Zm00001d007650	2.74689
Zm00001d007661	3.84277
Zm00001d007679	6.0652
Zm00001d007687	2.55424
Zm00001d007695	3.64735
Zm00001d007697	2.33185
Zm00001d007719	3.09096
Zm00001d007746	2.12762
Zm00001d007753	3.43395
Zm00001d007759	2.2278
Zm00001d007775	2.20194
Zm00001d007778	3.02373
Zm00001d007781	2.57216
Zm00001d007799	2.17985
Zm00001d007802	2.36982
Zm00001d007806	2.57335
Zm00001d007840	2.06881
Zm00001d007849	2.72345
Zm00001d007868	2.88532
Zm00001d007872	2.75355
Zm00001d007886	2.31978
Zm00001d007893	2.42871
Zm00001d007905	2.11629
Zm00001d007932	2.0017
Zm00001d007940	3.31032
Zm00001d007942	2.55904
Zm00001d007943	3.69175
Zm00001d007945	2.34566
Zm00001d007948	2.80663
Zm00001d007966	2.1254
Zm00001d007972	2.96412
Zm00001d008003	2.36356
Zm00001d008016	2.46935
Zm00001d008034	3.64735
Zm00001d008036	2.47673
Zm00001d008079	3.76975
Zm00001d008086	2.79791
Zm00001d008103	3.04789
Zm00001d008104	2.10678
Zm00001d008105	3.51772
Zm00001d008115	3.62463
Zm00001d008130	2.97827
Zm00001d008140	2.93533
Zm00001d008141	2.91681
Zm00001d008162	2.95875
Zm00001d008177	2.29943
Zm00001d008178	2.44733
Zm00001d008179	2.4356
Zm00001d008208	2.27671
Zm00001d008211	2.06931
Zm00001d008219	3.92419
Zm00001d008225	2.02784
Zm00001d008238	2.5383
Zm00001d008242	2.69626
Zm00001d008251	2.1834
Zm00001d008256	3.59488
Zm00001d008268	4.07529
Zm00001d008276	6.50844
Zm00001d008281	3.05828
Zm00001d008284	2.75727
Zm00001d008310	2.3027
Zm00001d008324	3.01659
Zm00001d008342	2.84375
Zm00001d008355	2.21721
Zm00001d008360	2.95547
Zm00001d008363	2.73239
Zm00001d008369	2.17573
Zm00001d008380	3.10678
Zm00001d008381	3.81728
Zm00001d008387	2.31032
Zm00001d008393	3.8679
Zm00001d008406	2.78871
Zm00001d008409	2.67289
Zm00001d008428	2.12386
Zm00001d008429	2.00209
Zm00001d008434	2.19579
Zm00001d008455	2.46113
Zm00001d008468	3.52836
Zm00001d008498	2.62463
Zm00001d008512	2.36356
Zm00001d008514	3.82816
Zm00001d008520	2.20632
Zm00001d008530	2.40224
Zm00001d008557	3.78544
Zm00001d008581	2.23231
Zm00001d008597	3.36982
Zm00001d008604	2.3563
Zm00001d008614	2.48529
Zm00001d008617	2.69175
Zm00001d008618	2.17717
Zm00001d008654	2.31323
Zm00001d008663	3.93275
Zm00001d008679	2.72981
Zm00001d008744	2.56574
Zm00001d008752	4.0778
Zm00001d008763	2.55424
Zm00001d008778	3.66527
Zm00001d008789	2.03967
Zm00001d008805	3.31978
Zm00001d008815	2.05195
Zm00001d008819	2.14985
Zm00001d008843	2.14544
Zm00001d008847	2.83435
Zm00001d008849	2.9872
Zm00001d008856	2.96476
Zm00001d008869	2.55424
Zm00001d008870	3.03278
Zm00001d008871	2.1254
Zm00001d008875	2.09856
Zm00001d008922	2.38432
Zm00001d008923	2.0035
Zm00001d008933	4.72417
Zm00001d008941	2.42871
Zm00001d008991	2.69175
Zm00001d009004	2.21899
Zm00001d009024	2.27413
Zm00001d009054	2.00908
Zm00001d009076	2.41289
Zm00001d009081	2.19579
Zm00001d009085	2.25338
Zm00001d009125	3.1392
Zm00001d009146	2.09625
Zm00001d009182	2.00992
Zm00001d009220	2.62644
Zm00001d009221	2.46935
Zm00001d009229	3.75588
Zm00001d009270	4.52777
Zm00001d009288	2.2889
Zm00001d009312	2.72947
Zm00001d009314	3.3616
Zm00001d009316	2.78753
Zm00001d009317	3.13094
Zm00001d009324	4.15515
Zm00001d009330	3.15831
Zm00001d009352	2.29881
Zm00001d009364	3.08476
Zm00001d009374	5.23504
Zm00001d009383	2.81728
Zm00001d009415	4.09291
Zm00001d009425	2.03546
Zm00001d009439	2.72031
Zm00001d009450	2.19174
Zm00001d009496	2.91681
Zm00001d009497	2.19425
Zm00001d009503	2.35796
Zm00001d009514	2.91134
Zm00001d009520	3.10582
Zm00001d009521	2.30913
Zm00001d009540	2.45471
Zm00001d009541	2.57245
Zm00001d009589	2.15831
Zm00001d009591	2.3153
Zm00001d009592	2.84375
Zm00001d009597	4.26206
Zm00001d009598	2.36982
Zm00001d009601	2.80278
Zm00001d009618	2.39074
Zm00001d009626	2.30816
Zm00001d009653	2.28294
Zm00001d009657	2.5251
Zm00001d009658	2.8641
Zm00001d009666	2.49535
Zm00001d009718	2.86403
Zm00001d009726	2.83435
Zm00001d009731	2.00631
Zm00001d009733	2.40224
Zm00001d009750	4.81728
Zm00001d009751	2.15676
Zm00001d009771	2.63224
Zm00001d009800	3.08602
Zm00001d009808	2.72607
Zm00001d009810	3.40224
Zm00001d009821	2.72708
Zm00001d009823	3.06881
Zm00001d009874	4.32507
Zm00001d009879	2.48529
Zm00001d009883	2.21029
Zm00001d009910	3.75016
Zm00001d009920	3.40224
Zm00001d009923	2.20584
Zm00001d009926	5.01367
Zm00001d009940	2.17342
Zm00001d009941	3.32918
Zm00001d009983	2.55424
Zm00001d009990	3.06239
Zm00001d009997	2.23231
Zm00001d010016	2.94281
Zm00001d010043	3.49284
Zm00001d010049	2.01659
Zm00001d010062	3.11629
Zm00001d010078	2.27538
Zm00001d010094	3.1392
Zm00001d010109	2.64735
Zm00001d010126	2.25468
Zm00001d010137	2.1507
Zm00001d010152	2.53647
Zm00001d010179	2.14658
Zm00001d010190	4.96412
Zm00001d010199	2.1392
Zm00001d010200	2.1684
Zm00001d010207	2.03967
Zm00001d010209	2.29121
Zm00001d010214	2.39742
Zm00001d010228	2.96928
Zm00001d010229	2.34335
Zm00001d010235	2.5593
Zm00001d010292	2.21583
Zm00001d010309	3.63034
Zm00001d010321	2.20844
Zm00001d010324	2.65813
Zm00001d010341	3.59221
Zm00001d010368	2.1392
Zm00001d010390	2.83108
Zm00001d010395	3.09481
Zm00001d010413	2.33185
Zm00001d010424	2.41787
Zm00001d010425	2.79866
Zm00001d010443	2.03967
Zm00001d010455	2.97185
Zm00001d010456	2.07619
Zm00001d010457	3.10678
Zm00001d010459	2.06352
Zm00001d010462	2.01891
Zm00001d010466	2.30728
Zm00001d010470	2.03967
Zm00001d010480	3.41818
Zm00001d010497	2.23231
Zm00001d010500	2.02081
Zm00001d010525	2.1981
Zm00001d010526	3.19579
Zm00001d010543	2.87617
Zm00001d010567	2.08031
Zm00001d010568	2.20138
Zm00001d010572	2.06881
Zm00001d010578	2.18695
Zm00001d010579	2.36982
Zm00001d010590	2.90788
Zm00001d010591	4.70624
Zm00001d010599	4.30842
Zm00001d010606	3.4991
Zm00001d010611	2.12128
Zm00001d010622	2.00568
Zm00001d010633	2.62463
Zm00001d010639	2.55424
Zm00001d010646	2.68235
Zm00001d010656	2.40224
Zm00001d010666	3.1392
Zm00001d010705	4.03967
Zm00001d010710	2.55424
Zm00001d010711	2.81728
Zm00001d010714	2.5251
Zm00001d010716	2.26402
Zm00001d010718	2.75838
Zm00001d010720	2.4356
Zm00001d010723	2.91681
Zm00001d010731	3.08476
Zm00001d010758	2.12128
Zm00001d010782	4.62463
Zm00001d010792	2.40224
Zm00001d010796	3.1038
Zm00001d010798	2.17717
Zm00001d010804	2.50143
Zm00001d010811	3.64735
Zm00001d010812	2.0406
Zm00001d010814	2.2432
Zm00001d010823	2.05432
Zm00001d010835	3.33185
Zm00001d010858	2.72417
Zm00001d010859	2.22402
Zm00001d010862	2.28194
Zm00001d010863	2.09373
Zm00001d010866	3.45728
Zm00001d010887	2.22536
Zm00001d010944	2.39074
Zm00001d010946	3.40224
Zm00001d010958	2.00992
Zm00001d010961	4.23231
Zm00001d010997	2.1254
Zm00001d011006	2.49261
Zm00001d011055	3.60155
Zm00001d011075	2.02373
Zm00001d011090	2.19627
Zm00001d011097	2.43025
Zm00001d011100	2.58333
Zm00001d011111	3.26907
Zm00001d011121	2.1392
Zm00001d011140	2.12456
Zm00001d011146	2.34274
Zm00001d011168	2.26474
Zm00001d011177	2.43139
Zm00001d011185	2.11202
Zm00001d011188	2.17985
Zm00001d011199	2.89528
Zm00001d011220	2.23231
Zm00001d011222	4.05432
Zm00001d011259	3.19645
Zm00001d011272	2.16093
Zm00001d011282	2.48713
Zm00001d011283	3.0314
Zm00001d011299	2.53488
Zm00001d011301	5.61314
Zm00001d011308	3.14985
Zm00001d011321	2.48323
Zm00001d011336	2.23231
Zm00001d011347	2.39086
Zm00001d011352	2.91681
Zm00001d011365	2.03967
Zm00001d011366	2.68409
Zm00001d011373	2.80722
Zm00001d011379	2.19049
Zm00001d011401	2.17985
Zm00001d011405	3.06098
Zm00001d011413	2.31978
Zm00001d011417	2.1392
Zm00001d011424	2.1254
Zm00001d011447	2.82299
Zm00001d011449	2.74168
Zm00001d011454	3.78591
Zm00001d011472	2.39074
Zm00001d011478	3.28607
Zm00001d011483	2.43688
Zm00001d011488	3.2413
Zm00001d011490	2.74689
Zm00001d011518	4.57018
Zm00001d011519	2.04789
Zm00001d011526	2.75886
Zm00001d011527	2.23803
Zm00001d011541	2.58024
Zm00001d011544	2.90033
Zm00001d011560	2.40634
Zm00001d011562	3.23231
Zm00001d011563	2.55424
Zm00001d011572	2.1392
Zm00001d011580	2.09481
Zm00001d011581	2.17039
Zm00001d011585	4.91414
Zm00001d011588	2.58024
Zm00001d011592	2.69175
Zm00001d011594	3.06239
Zm00001d011595	2.71036
Zm00001d011607	3.27671
Zm00001d011615	3.61083
Zm00001d011625	2.32239
Zm00001d011638	2.15364
Zm00001d011643	2.54371
Zm00001d011646	3.16192
Zm00001d011677	2.69863
Zm00001d011681	2.17091
Zm00001d011691	2.59221
Zm00001d011692	2.17154
Zm00001d011705	3.34779
Zm00001d011711	2.13278
Zm00001d011713	3.3027
Zm00001d011720	4.72417
Zm00001d011742	2.10678
Zm00001d011746	2.11684
Zm00001d011750	2.2774
Zm00001d011764	2.81728
Zm00001d011776	2.76837
Zm00001d011790	3.26474
Zm00001d011791	2.53406
Zm00001d011796	2.0173
Zm00001d011799	2.92419
Zm00001d011805	4.3616
Zm00001d011827	2.02586
Zm00001d011832	2.83639
Zm00001d011837	2.49412
Zm00001d011842	3.18214
Zm00001d011854	2.47756
Zm00001d011874	2.80217
Zm00001d011885	2.0908
Zm00001d011890	2.15064
Zm00001d011892	2.00675
Zm00001d011900	2.35517
Zm00001d011912	2.41164
Zm00001d011914	2.20959
Zm00001d011922	2.28676
Zm00001d011931	4.63034
Zm00001d011943	2.34779
Zm00001d011945	2.10678
Zm00001d011956	2.11301
Zm00001d011959	2.50177
Zm00001d011963	2.10678
Zm00001d011990	2.49535
Zm00001d012036	2.35001
Zm00001d012042	3.38071
Zm00001d012047	2.38071
Zm00001d012049	3.3951
Zm00001d012066	3.87617
Zm00001d012104	3.27089
Zm00001d012156	2.78075
Zm00001d012159	3.67794
Zm00001d012166	2.0226
Zm00001d012171	3.89528
Zm00001d012197	2.09029
Zm00001d012199	2.45286
Zm00001d012211	2.12308
Zm00001d012213	2.12909
Zm00001d012223	2.03967
Zm00001d012238	2.17231
Zm00001d012239	3.71774
Zm00001d012244	2.41289
Zm00001d012258	2.69175
Zm00001d012267	2.53755
Zm00001d012270	2.04901
Zm00001d012274	3.48529
Zm00001d012279	2.85524
Zm00001d012296	2.70263
Zm00001d012327	2.99481
Zm00001d012401	2.27671
Zm00001d012435	3.45471
Zm00001d012459	2.02749
Zm00001d012463	2.26884
Zm00001d012465	2.02373
Zm00001d012479	2.70624
Zm00001d012501	2.11907
Zm00001d012503	3.57335
Zm00001d012510	2.51772
Zm00001d012511	2.21937
Zm00001d012524	2.38843
Zm00001d012537	2.2423
Zm00001d012552	2.04818
Zm00001d012560	2.25266
Zm00001d012584	2.14485
Zm00001d012619	2.88767
Zm00001d012625	2.81728
Zm00001d012628	2.81728
Zm00001d012629	2.30631
Zm00001d012632	2.35784
Zm00001d012642	5.9258
Zm00001d012643	2.30597
Zm00001d012644	2.53974
Zm00001d012645	2.06239
Zm00001d012654	2.41818
Zm00001d012655	2.3767
Zm00001d012656	2.04728
Zm00001d012658	2.64735
Zm00001d012661	2.52423
Zm00001d012667	2.46935
Zm00001d012670	2.03967
Zm00001d012672	2.02586
Zm00001d012677	2.40224
Zm00001d012701	2.48024
Zm00001d012729	2.24808
Zm00001d012738	3.02784
Zm00001d012742	4.16777
Zm00001d012748	2.75588
Zm00001d012750	2.98522
Zm00001d012751	2.47263
Zm00001d012752	2.60671
Zm00001d012760	2.65378
Zm00001d012761	2.03451
Zm00001d012775	2.17091
Zm00001d012794	2.06881
Zm00001d012801	3.36356
Zm00001d012812	2.58595
Zm00001d012815	2.72827
Zm00001d012816	2.03083
Zm00001d012817	2.40224
Zm00001d012858	2.68549
Zm00001d012861	2.40515
Zm00001d012876	4.31978
Zm00001d012880	2.33327
Zm00001d012917	2.1486
Zm00001d012918	2.51557
Zm00001d012920	2.01932
Zm00001d012921	2.19815
Zm00001d012931	4.40985
Zm00001d012934	2.18053
Zm00001d012935	4.81728
Zm00001d012957	2.16192
Zm00001d012958	2.27296
Zm00001d012974	2.27671
Zm00001d012975	3.00992
Zm00001d012978	2.46935
Zm00001d012979	2.1392
Zm00001d012983	3.30894
Zm00001d012992	2.35215
Zm00001d013023	2.85792
Zm00001d013036	4.05674
Zm00001d013041	2.03967
Zm00001d013057	2.02586
Zm00001d013058	2.64735
Zm00001d013059	2.69175
Zm00001d013063	2.23231
Zm00001d013065	2.81728
Zm00001d013093	2.6771
Zm00001d013098	2.49535
Zm00001d013101	2.40224
Zm00001d013106	2.46404
Zm00001d013116	2.04609
Zm00001d013117	2.09801
Zm00001d013122	3.58079
Zm00001d013144	2.41031
Zm00001d013175	2.10678
Zm00001d013185	4.55424
Zm00001d013190	2.28676
Zm00001d013201	2.45728
Zm00001d013203	2.08031
Zm00001d013204	4.55424
Zm00001d013210	2.69175
Zm00001d013226	2.61083
Zm00001d013237	2.91681
Zm00001d013239	2.47485
Zm00001d013242	2.47178
Zm00001d013244	2.36724
Zm00001d013247	2.15831
Zm00001d013265	3.14469
Zm00001d013267	2.00283
Zm00001d013276	3.77192
Zm00001d013288	2.43876
Zm00001d013302	2.06454
Zm00001d013308	3.53443
Zm00001d013319	5.33185
Zm00001d013325	2.34779
Zm00001d013329	2.66527
Zm00001d013342	3.02022
Zm00001d013346	2.74689
Zm00001d013358	2.2423
Zm00001d013361	2.43876
Zm00001d013375	2.33441
Zm00001d013376	3.52623
Zm00001d013380	2.57627
Zm00001d013383	3.48024
Zm00001d013391	2.57508
Zm00001d013397	2.55424
Zm00001d013402	5.44733
Zm00001d013405	3.25785
Zm00001d013406	2.48607
Zm00001d013427	2.23231
Zm00001d013431	2.03967
Zm00001d013432	2.98077
Zm00001d013439	2.29121
Zm00001d013442	2.74689
Zm00001d013465	2.34977
Zm00001d013466	2.12611
Zm00001d013469	2.17342
Zm00001d013477	2.55424
Zm00001d013486	2.46113
Zm00001d013488	4.07877
Zm00001d013492	2.05828
Zm00001d013497	2.7398
Zm00001d013499	3.09029
Zm00001d013509	2.15165
Zm00001d013510	3.40985
Zm00001d013521	2.37005
Zm00001d013523	2.7018
Zm00001d013527	2.31323
Zm00001d013528	2.24696
Zm00001d013531	3.87617
Zm00001d013533	2.69175
Zm00001d013547	2.03967
Zm00001d013548	2.89338
Zm00001d013552	2.17752
Zm00001d013572	2.29121
Zm00001d013598	2.35784
Zm00001d013599	2.17573
Zm00001d013609	2.09481
Zm00001d013624	2.65017
Zm00001d013643	2.93275
Zm00001d013645	4.4991
Zm00001d013653	2.23231
Zm00001d013660	2.91731
Zm00001d013662	2.56246
Zm00001d013664	3.2876
Zm00001d013673	2.44321
Zm00001d013676	2.23231
Zm00001d013695	2.04829
Zm00001d013697	2.1429
Zm00001d013700	2.81728
Zm00001d013702	2.51772
Zm00001d013720	2.29121
Zm00001d013722	4.1392
Zm00001d013728	2.09856
Zm00001d013729	4.23231
Zm00001d013742	2.43025
Zm00001d013744	4.01076
Zm00001d013750	2.46113
Zm00001d013768	2.79782
Zm00001d013780	2.63051
Zm00001d013786	2.96928
Zm00001d013796	2.02373
Zm00001d013804	2.76069
Zm00001d013812	2.41674
Zm00001d013825	3.62463
Zm00001d013828	2.1392
Zm00001d013829	2.66972
Zm00001d013836	5.23231
Zm00001d013847	2.49535
Zm00001d013857	3.31978
Zm00001d013859	2.24258
Zm00001d013861	2.20317
Zm00001d013863	2.76786
Zm00001d013865	2.44382
Zm00001d013868	2.32973
Zm00001d013892	2.897
Zm00001d013915	2.65427
Zm00001d013920	4.62463
Zm00001d013927	2.19118
Zm00001d013935	2.3172
Zm00001d013951	2.55424
Zm00001d013953	2.15831
Zm00001d013963	2.47958
Zm00001d013964	2.30336
Zm00001d013966	2.00099
Zm00001d013977	2.53974
Zm00001d013984	2.19579
Zm00001d013989	2.20185
Zm00001d013991	2.02487
Zm00001d013995	3.06204
Zm00001d013997	2.78557
Zm00001d014003	2.19049
Zm00001d014005	2.50177
Zm00001d014013	3.57572
Zm00001d014029	2.19579
Zm00001d014033	2.02586
Zm00001d014040	2.00992
Zm00001d014109	2.44709
Zm00001d014112	2.20632
Zm00001d014121	3.61636
Zm00001d014122	2.48385
Zm00001d014133	2.00992
Zm00001d014138	2.03967
Zm00001d014150	2.07026
Zm00001d014159	2.05234
Zm00001d014160	2.04789
Zm00001d014166	2.82299
Zm00001d014187	2.86213
Zm00001d014188	2.09481
Zm00001d014222	2.08031
Zm00001d014235	2.46935
Zm00001d014246	2.55424
Zm00001d014252	2.96928
Zm00001d014253	2.23231
Zm00001d014275	2.53348
Zm00001d014276	2.64735
Zm00001d014280	3.03967
Zm00001d014291	3.59488
Zm00001d014297	2.01891
Zm00001d014303	2.85192
Zm00001d014304	2.87542
Zm00001d014306	2.52777
Zm00001d014311	2.05432
Zm00001d014313	2.23803
Zm00001d014328	2.41674
Zm00001d014330	2.17573
Zm00001d014337	2.36982
Zm00001d014338	2.04813
Zm00001d014340	2.68603
Zm00001d014343	2.55049
Zm00001d014358	2.16012
Zm00001d014361	2.65734
Zm00001d014373	2.00384
Zm00001d014378	2.83694
Zm00001d014383	4.62463
Zm00001d014385	2.29532
Zm00001d014391	2.36356
Zm00001d014425	3.03967
Zm00001d014428	3.88384
Zm00001d014435	2.00725
Zm00001d014438	2.04294
Zm00001d014445	2.7248
Zm00001d014447	2.7163
Zm00001d014456	2.01891
Zm00001d014468	2.18479
Zm00001d014500	2.67289
Zm00001d014518	2.35261
Zm00001d014553	3.69829
Zm00001d014564	2.03967
Zm00001d014594	2.20959
Zm00001d014640	2.6417
Zm00001d014649	3.62463
Zm00001d014652	2.25759
Zm00001d014655	2.94013
Zm00001d014658	3.69175
Zm00001d014690	4.94656
Zm00001d014692	2.41491
Zm00001d014696	2.28194
Zm00001d014716	2.08792
Zm00001d014748	2.69175
Zm00001d014769	5.16777
Zm00001d014771	2.08031
Zm00001d014790	2.07888
Zm00001d014809	2.01659
Zm00001d014839	3.95478
Zm00001d014845	2.18733
Zm00001d014865	2.55424
Zm00001d014866	2.13469
Zm00001d014879	2.54805
Zm00001d014900	2.99458
Zm00001d014910	2.72417
Zm00001d014912	3.11182
Zm00001d014924	2.11246
Zm00001d014926	3.36982
Zm00001d014943	2.40329
Zm00001d014946	2.02878
Zm00001d014947	2.2006
Zm00001d014968	2.90111
Zm00001d014973	2.55424
Zm00001d014994	3.10107
Zm00001d014998	2.19989
Zm00001d015007	2.45471
Zm00001d015037	5.32824
Zm00001d015071	2.87665
Zm00001d015082	2.14237
Zm00001d015083	2.3027
Zm00001d015084	3.75588
Zm00001d015114	2.35471
Zm00001d015115	2.14616
Zm00001d015152	2.10678
Zm00001d015156	3.66527
Zm00001d015157	2.1652
Zm00001d015174	2.44954
Zm00001d015209	2.89745
Zm00001d015213	2.2043
Zm00001d015228	3.12456
Zm00001d015229	2.23231
Zm00001d015242	3.49535
Zm00001d015249	2.20095
Zm00001d015259	3.1392
Zm00001d015260	2.3616
Zm00001d015265	2.00992
Zm00001d015293	3.44321
Zm00001d015294	2.06239
Zm00001d015308	2.29017
Zm00001d015320	3.31978
Zm00001d015322	2.01522
Zm00001d015348	2.74421
Zm00001d015355	2.95221
Zm00001d015366	2.42496
Zm00001d015374	2.55836
Zm00001d015376	2.03967
Zm00001d015389	2.2629
Zm00001d015397	2.33512
Zm00001d015405	2.66442
Zm00001d015412	3.23886
Zm00001d015426	2.11845
Zm00001d015429	4.06881
Zm00001d015430	2.29121
Zm00001d015434	2.81728
Zm00001d015435	2.13629
Zm00001d015445	2.72613
Zm00001d015459	2.61314
Zm00001d015474	3.05828
Zm00001d015495	3.08476
Zm00001d015499	2.54044
Zm00001d015526	2.17835
Zm00001d015568	2.41818
Zm00001d015603	2.43473
Zm00001d015605	2.24808
Zm00001d015612	2.08674
Zm00001d015613	2.18561
Zm00001d015649	2.77663
Zm00001d015651	3.36571
Zm00001d015686	2.3027
Zm00001d015689	2.3798
Zm00001d015692	2.11767
Zm00001d015693	2.98309
Zm00001d015698	2.32576
Zm00001d015702	2.19579
Zm00001d015703	2.58024
Zm00001d015730	2.68901
Zm00001d015754	2.23231
Zm00001d015765	2.86491
Zm00001d015837	2.19125
Zm00001d015851	2.06881
Zm00001d015861	2.40224
Zm00001d015866	3.57627
Zm00001d015890	2.8982
Zm00001d015895	3.83435
Zm00001d015948	2.55424
Zm00001d015955	2.42496
Zm00001d015956	2.59377
Zm00001d015962	2.34779
Zm00001d015974	2.06496
Zm00001d015985	2.30913
Zm00001d015990	2.0049
Zm00001d015997	2.07026
Zm00001d015999	2.62463
Zm00001d016001	3.09029
Zm00001d016013	4.27045
Zm00001d016029	2.23655
Zm00001d016034	2.68121
Zm00001d016037	4.10678
Zm00001d016044	4.18068
Zm00001d016048	3.1652
Zm00001d016077	2.69175
Zm00001d016081	2.64735
Zm00001d016100	2.07529
Zm00001d016106	2.35832
Zm00001d016155	2.36982
Zm00001d016156	3.03967
Zm00001d016158	3.88767
Zm00001d016183	3.8052
Zm00001d016197	3.02817
Zm00001d016203	2.43395
Zm00001d016228	2.46327
Zm00001d016248	2.1254
Zm00001d016286	3.51666
Zm00001d016306	4.55424
Zm00001d016311	2.51677
Zm00001d016326	2.39296
Zm00001d016373	2.22088
Zm00001d016378	2.70061
Zm00001d016382	2.46935
Zm00001d016397	2.40621
Zm00001d016402	3.03967
Zm00001d016406	2.89528
Zm00001d016417	3.23231
Zm00001d016440	2.75016
Zm00001d016442	2.29121
Zm00001d016452	2.25024
Zm00001d016458	3.85029
Zm00001d016475	2.75336
Zm00001d016479	4.19579
Zm00001d016490	2.08031
Zm00001d016516	2.43395
Zm00001d016530	2.00077
Zm00001d016572	2.14762
Zm00001d016581	2.36982
Zm00001d016587	2.80434
Zm00001d016591	2.20959
Zm00001d016615	4.84375
Zm00001d016619	2.48229
Zm00001d016634	2.23231
Zm00001d016653	2.77288
Zm00001d016659	4.2423
Zm00001d016662	2.03967
Zm00001d016666	2.25362
Zm00001d016679	2.2137
Zm00001d016722	2.07852
Zm00001d016727	2.11006
Zm00001d016738	2.25024
Zm00001d016764	2.60192
Zm00001d016768	2.12487
Zm00001d016783	2.26449
Zm00001d016802	2.01367
Zm00001d016803	2.57978
Zm00001d016804	2.03814
Zm00001d016816	2.1254
Zm00001d016823	2.10678
Zm00001d016824	2.69175
Zm00001d016850	2.17787
Zm00001d016873	2.22143
Zm00001d016874	3.88439
Zm00001d016884	2.20632
Zm00001d016890	2.75956
Zm00001d016901	3.02373
Zm00001d016910	2.8497
Zm00001d016915	2.12682
Zm00001d016916	3.47415
Zm00001d016918	2.35149
Zm00001d016928	2.0017
Zm00001d016943	2.00992
Zm00001d016972	2.04074
Zm00001d016990	2.05432
Zm00001d016991	2.19579
Zm00001d016992	2.25024
Zm00001d016993	2.07305
Zm00001d016995	2.09029
Zm00001d016996	2.00992
Zm00001d017000	3.54217
Zm00001d017030	2.21524
Zm00001d017041	3.00725
Zm00001d017045	2.49535
Zm00001d017050	2.77788
Zm00001d017060	2.63441
Zm00001d017088	2.29121
Zm00001d017114	2.19425
Zm00001d017119	2.2488
Zm00001d017129	2.08916
Zm00001d017141	2.29767
Zm00001d017145	2.20696
Zm00001d017153	2.03409
Zm00001d017165	3.06098
Zm00001d017166	2.81728
Zm00001d017170	3.10678
Zm00001d017172	2.14658
Zm00001d017195	2.43395
Zm00001d017205	4.27671
Zm00001d017209	2.10444
Zm00001d017210	2.04997
Zm00001d017219	2.55424
Zm00001d017225	3.25024
Zm00001d017251	4.1392
Zm00001d017253	2.0668
Zm00001d017275	2.05948
Zm00001d017334	3.0459
Zm00001d017353	2.02081
Zm00001d017361	2.05544
Zm00001d017377	2.27913
Zm00001d017392	2.3027
Zm00001d017396	2.08602
Zm00001d017401	3.10678
Zm00001d017421	2.96928
Zm00001d017422	2.06239
Zm00001d017427	2.88767
Zm00001d017445	3.89206
Zm00001d017448	2.17342
Zm00001d017456	2.54736
Zm00001d017468	2.12229
Zm00001d017470	2.02373
Zm00001d017475	2.66527
Zm00001d017478	3.11006
Zm00001d017482	2.93451
Zm00001d017483	2.45471
Zm00001d017497	2.03967
Zm00001d017500	2.43261
Zm00001d017504	2.17091
Zm00001d017505	3.80278
Zm00001d017514	2.78485
Zm00001d017522	2.11527
Zm00001d017545	2.38943
Zm00001d017550	2.84281
Zm00001d017553	2.1392
Zm00001d017560	2.23051
Zm00001d017564	3.34779
Zm00001d017575	2.05645
Zm00001d017593	2.81728
Zm00001d017604	3.40224
Zm00001d017617	2.31323
Zm00001d017618	3.3027
Zm00001d017625	2.06881
Zm00001d017640	2.40224
Zm00001d017641	2.48607
Zm00001d017644	2.39812
Zm00001d017650	2.18651
Zm00001d017660	3.39812
Zm00001d017686	2.19989
Zm00001d017691	2.35471
Zm00001d017700	2.72243
Zm00001d017707	2.84529
Zm00001d017711	2.58281
Zm00001d017721	3.78544
Zm00001d017729	2.28294
Zm00001d017730	2.7637
Zm00001d017769	2.16722
Zm00001d017783	2.07619
Zm00001d017784	2.69175
Zm00001d017798	3.81728
Zm00001d017800	2.22285
Zm00001d017808	2.37916
Zm00001d017810	2.02586
Zm00001d017817	2.76837
Zm00001d017818	3.37053
Zm00001d017830	3.53348
Zm00001d017832	2.23231
Zm00001d017848	2.43395
Zm00001d017861	2.04294
Zm00001d017867	2.1392
Zm00001d017869	2.56192
Zm00001d017871	2.44733
Zm00001d017874	2.99481
Zm00001d017876	2.37636
Zm00001d017878	4.31735
Zm00001d017881	2.72827
Zm00001d017889	2.33185
Zm00001d017897	2.11367
Zm00001d017903	3.63086
Zm00001d017912	3.59572
Zm00001d017920	3.52182
Zm00001d017953	2.88767
Zm00001d017965	2.62463
Zm00001d017983	3.03585
Zm00001d017984	2.58987
Zm00001d017985	2.27184
Zm00001d017988	2.28676
Zm00001d018001	2.66972
Zm00001d018005	3.67977
Zm00001d018009	2.09481
Zm00001d018036	3.75588
Zm00001d018040	2.0378
Zm00001d018056	2.91097
Zm00001d018074	2.43876
Zm00001d018096	2.29121
Zm00001d018097	3.86167
Zm00001d018099	2.46042
Zm00001d018121	2.55424
Zm00001d018125	2.27045
Zm00001d018135	2.75886
Zm00001d018141	3.17091
Zm00001d018148	2.33687
Zm00001d018161	2.62463
Zm00001d018183	4.1392
Zm00001d018184	2.29121
Zm00001d018199	3.64735
Zm00001d018202	4.03967
Zm00001d018210	2.18695
Zm00001d018217	3.34779
Zm00001d018226	3.31032
Zm00001d018233	2.75588
Zm00001d018246	2.46497
Zm00001d018254	5.29121
Zm00001d018262	2.27045
Zm00001d018270	2.02373
Zm00001d018274	2.0132
Zm00001d018281	2.17483
Zm00001d018287	3.71036
Zm00001d018289	2.84899
Zm00001d018291	2.23231
Zm00001d018316	2.26474
Zm00001d018318	3.77663
Zm00001d018319	5.48024
Zm00001d018329	4.16123
Zm00001d018347	2.48024
Zm00001d018349	3.17091
Zm00001d018350	2.29644
Zm00001d018371	2.0017
Zm00001d018382	2.59988
Zm00001d018388	3.05432
Zm00001d018399	2.35784
Zm00001d018405	2.38071
Zm00001d018408	4.71774
Zm00001d018413	2.05674
Zm00001d018419	2.26762
Zm00001d018421	2.1652
Zm00001d018423	3.09856
Zm00001d018424	2.71774
Zm00001d018425	2.66527
Zm00001d018438	3.32496
Zm00001d018444	3.29121
Zm00001d018445	3.17873
Zm00001d018447	3.81728
Zm00001d018450	2.08697
Zm00001d018462	2.33665
Zm00001d018484	2.5339
Zm00001d018485	2.41931
Zm00001d018487	3.95721
Zm00001d018491	2.81728
Zm00001d018499	2.15831
Zm00001d018502	3.19579
Zm00001d018503	3.23231
Zm00001d018507	6.75979
Zm00001d018508	2.06239
Zm00001d018531	2.17091
Zm00001d018532	3.91681
Zm00001d018543	2.52253
Zm00001d018545	2.1507
Zm00001d018561	2.23231
Zm00001d018562	2.14034
Zm00001d018564	2.08031
Zm00001d018595	2.75016
Zm00001d018597	3.38071
Zm00001d018636	2.11668
Zm00001d018637	4.03598
Zm00001d018642	2.02586
Zm00001d018655	2.91681
Zm00001d018665	2.52982
Zm00001d018686	2.1392
Zm00001d018694	2.19579
Zm00001d018703	3.02586
Zm00001d018704	2.42871
Zm00001d018705	2.94281
Zm00001d018718	2.29532
Zm00001d018724	2.59127
Zm00001d018756	2.82726
Zm00001d018776	3.61083
Zm00001d018786	3.59488
Zm00001d018792	3.40224
Zm00001d018795	2.7579
Zm00001d018802	3.00992
Zm00001d018831	2.59488
Zm00001d018841	2.14985
Zm00001d018859	2.68111
Zm00001d018870	2.01698
Zm00001d018871	2.60686
Zm00001d018894	2.06983
Zm00001d018907	2.21552
Zm00001d018918	2.76069
Zm00001d018927	2.93275
Zm00001d018939	3.10678
Zm00001d018941	2.01367
Zm00001d018961	2.81728
Zm00001d019001	2.03444
Zm00001d019036	3.44321
Zm00001d019040	2.14073
Zm00001d019078	2.69175
Zm00001d019084	4.34452
Zm00001d019104	2.90537
Zm00001d019106	2.34084
Zm00001d019108	2.34779
Zm00001d019123	2.66972
Zm00001d019139	2.17091
Zm00001d019149	2.04609
Zm00001d019164	3.93275
Zm00001d019166	2.30913
Zm00001d019191	3.09738
Zm00001d019194	2.49535
Zm00001d019215	2.81728
Zm00001d019217	2.49231
Zm00001d019237	3.66527
Zm00001d019239	2.24088
Zm00001d019241	2.0173
Zm00001d019247	2.51666
Zm00001d019259	2.81728
Zm00001d019263	2.22024
Zm00001d019271	3.51327
Zm00001d019288	2.76837
Zm00001d019304	3.02575
Zm00001d019314	2.40224
Zm00001d019326	2.34779
Zm00001d019335	3.27671
Zm00001d019346	2.1392
Zm00001d019355	2.55424
Zm00001d019356	3.75588
Zm00001d019374	2.01891
Zm00001d019387	3.60155
Zm00001d019405	2.17091
Zm00001d019426	2.92051
Zm00001d019432	2.68352
Zm00001d019472	2.10678
Zm00001d019473	2.71036
Zm00001d019479	2.17573
Zm00001d019481	2.31735
Zm00001d019491	2.02586
Zm00001d019497	2.37224
Zm00001d019507	2.06881
Zm00001d019511	2.11006
Zm00001d019515	4.0459
Zm00001d019526	4.41818
Zm00001d019534	2.59488
Zm00001d019536	2.77288
Zm00001d019542	2.47407
Zm00001d019562	2.45728
Zm00001d019563	2.33185
Zm00001d019582	2.252
Zm00001d019584	3.76283
Zm00001d019595	3.55424
Zm00001d019600	2.66318
Zm00001d019627	2.13278
Zm00001d019631	2.32918
Zm00001d019641	3.71774
Zm00001d019644	2.31978
Zm00001d019664	2.56162
Zm00001d019677	4.03967
Zm00001d019688	2.95547
Zm00001d019699	2.68737
Zm00001d019703	3.55424
Zm00001d019721	3.48529
Zm00001d019765	5.17376
Zm00001d019789	2.55424
Zm00001d019803	2.36982
Zm00001d019813	2.45074
Zm00001d019824	2.03967
Zm00001d019842	2.36982
Zm00001d019856	2.31478
Zm00001d019866	2.3027
Zm00001d019873	2.8538
Zm00001d019881	2.1392
Zm00001d019892	2.32041
Zm00001d019901	2.04878
Zm00001d019907	2.0663
Zm00001d019908	2.37367
Zm00001d019947	2.82569
Zm00001d019948	3.46058
Zm00001d019949	2.04972
Zm00001d019950	2.50985
Zm00001d019957	2.23231
Zm00001d019963	2.62463
Zm00001d019967	2.34779
Zm00001d019976	2.70108
Zm00001d019979	3.04728
Zm00001d019988	2.10678
Zm00001d020001	4.03027
Zm00001d020023	2.65265
Zm00001d020032	2.13588
Zm00001d020036	2.62659
Zm00001d020043	2.60487
Zm00001d020055	3.66527
Zm00001d020057	2.01367
Zm00001d020087	4.13278
Zm00001d020091	2.74421
Zm00001d020093	2.77663
Zm00001d020097	2.59488
Zm00001d020108	2.02432
Zm00001d020110	4.52777
Zm00001d020112	2.01891
Zm00001d020117	2.59077
Zm00001d020118	2.68549
Zm00001d020160	2.80217
Zm00001d020182	2.04538
Zm00001d020185	2.17091
Zm00001d020209	2.11202
Zm00001d020219	2.02586
Zm00001d020228	2.48024
Zm00001d020238	2.71036
Zm00001d020242	2.6367
Zm00001d020312	2.05674
Zm00001d020353	2.33185
Zm00001d020365	3.35062
Zm00001d020366	2.91681
Zm00001d020425	3.81728
Zm00001d020431	2.04789
Zm00001d020432	2.66527
Zm00001d020444	2.36476
Zm00001d020450	2.15881
Zm00001d020461	2.37367
Zm00001d020472	3.36476
Zm00001d020476	2.78913
Zm00001d020485	4.73481
Zm00001d020492	3.09625
Zm00001d020502	3.91681
Zm00001d020505	2.96567
Zm00001d020515	2.1652
Zm00001d020516	2.74046
Zm00001d020535	2.25024
Zm00001d020538	2.1507
Zm00001d020541	2.1652
Zm00001d020543	2.20632
Zm00001d020555	2.07714
Zm00001d020568	2.55424
Zm00001d020602	2.21156
Zm00001d020603	2.67526
Zm00001d020643	3.59221
Zm00001d020659	2.66527
Zm00001d020679	2.66527
Zm00001d020683	2.23803
Zm00001d020693	2.34566
Zm00001d020696	2.03546
Zm00001d020697	2.48024
Zm00001d020728	4.10678
Zm00001d020738	2.34335
Zm00001d020748	2.21781
Zm00001d020774	3.1392
Zm00001d020799	3.26474
Zm00001d020822	2.28676
Zm00001d020834	3.1392
Zm00001d020835	2.76481
Zm00001d020853	2.40681
Zm00001d020862	2.02784
Zm00001d020898	2.53974
Zm00001d020908	2.80722
Zm00001d020911	2.46935
Zm00001d020929	4.97255
Zm00001d020944	3.02586
Zm00001d020946	2.03967
Zm00001d020962	2.08031
Zm00001d020972	2.04789
Zm00001d020975	2.03967
Zm00001d020977	2.70341
Zm00001d020978	2.23231
Zm00001d020980	2.15118
Zm00001d021009	2.00992
Zm00001d021070	2.17514
Zm00001d021072	2.44644
Zm00001d021082	2.72417
Zm00001d021123	2.0017
Zm00001d021127	3.47178
Zm00001d021145	3.1537
Zm00001d021169	2.24791
Zm00001d021189	3.06881
Zm00001d021202	2.39086
Zm00001d021219	3.91414
Zm00001d021227	3.8352
Zm00001d021240	2.62136
Zm00001d021241	2.12293
Zm00001d021246	3.27538
Zm00001d021261	4.10678
Zm00001d021267	3.38432
Zm00001d021269	2.7263
Zm00001d021287	2.4409
Zm00001d021296	2.61083
Zm00001d021297	2.19167
Zm00001d021299	2.25441
Zm00001d021306	2.25468
Zm00001d021310	2.82244
Zm00001d021314	2.27413
Zm00001d021318	2.99785
Zm00001d021331	2.46327
Zm00001d021347	2.72417
Zm00001d021351	2.02373
Zm00001d021368	2.26206
Zm00001d021372	3.51666
Zm00001d021376	4.05674
Zm00001d021385	2.36649
Zm00001d021396	2.20959
Zm00001d021404	2.28478
Zm00001d021407	3.96928
Zm00001d021421	2.46881
Zm00001d021430	2.37422
Zm00001d021438	2.47065
Zm00001d021450	3.16777
Zm00001d021467	2.54044
Zm00001d021475	2.16277
Zm00001d021476	2.01659
Zm00001d021480	3.36244
Zm00001d021488	2.31978
Zm00001d021490	2.24429
Zm00001d021498	2.26884
Zm00001d021504	2.23231
Zm00001d021518	3.32918
Zm00001d021519	2.08646
Zm00001d021522	2.23923
Zm00001d021529	3.48529
Zm00001d021541	2.12713
Zm00001d021545	2.17342
Zm00001d021551	2.32918
Zm00001d021553	5.11006
Zm00001d021558	2.13278
Zm00001d021569	2.44733
Zm00001d021574	2.92419
Zm00001d021582	2.71036
Zm00001d021584	2.43822
Zm00001d021589	2.55424
Zm00001d021593	2.93686
Zm00001d021595	3.03967
Zm00001d021600	2.33609
Zm00001d021607	2.11202
Zm00001d021609	2.48024
Zm00001d021617	3.84
Zm00001d021624	2.01235
Zm00001d021633	2.94656
Zm00001d021635	2.01076
[truncated: 4,709 more rows]
