# Supplementary material for: SDG102, a H3K36-Methyltransferase-Encoding Gene, Plays Pleiotropic Roles in Growth and Development of Maize (Zea mays L.)
Source: Int J Mol Sci. 2022 Jul 5;23(13):7458. doi: 10.3390/ijms23137458 (PMC9267571; doi:10.3390/ijms23137458)
Supplement: Supplementary file 1 [file ijms-23-07458-s001.zip › Table S5 GO terms on genes with significant changed H3K36me3.xlsx]

## Sheet: AS1-Go terms on Down-regulated 
Category	GOID	Description	GeneRatio	BgRatio	pvalue	padj	geneID	geneName	Count
BP	GO:0033365	protein localization to organelle	117/3483	396/22306	1.31126e-12	2.8415e-09	Zm00001d000349/Zm00001d001882/Zm00001d002462/Zm00001d003502/Zm00001d003846/Zm00001d003913/Zm00001d004051/Zm00001d004119/Zm00001d004655/Zm00001d005062/Zm00001d005373/Zm00001d006107/Zm00001d006214/Zm00001d006588/Zm00001d006939/Zm00001d007065/Zm00001d007943/Zm00001d008345/Zm00001d008613/Zm00001d009850/Zm00001d011266/Zm00001d011578/Zm00001d012017/Zm00001d012618/Zm00001d012853/Zm00001d012861/Zm00001d0…	-/-/-/-/-/high chlorophyll fluorescence106/-/-/-/-/-/pyruvate dehydrogenase3/-/-/-/-/-/-/-/importin1/-/TUB-transcription factor 1/-/-/-/-/-/-/-/-/-/chaperonin 1/-/-/-/-/-/-/vacuolar protein sorting2/-/-/-/LON peptidase1/-/-/-/-/-/-/-/-/signal recognition particle receptor homolog1/-/-/-/-/-/-/-/-/-/-/-/-/-/thylakoid assembly4/-/-/-/-/-/-/-/-/-/-/-/-/-/-/TUB-transcription factor 5/-/-/-/-/-/-/-/-/…	117
BP	GO:0072594	establishment of protein localization to organelle	95/3483	326/22306	3.77186e-10	4.08681e-07	Zm00001d000349/Zm00001d001882/Zm00001d002462/Zm00001d003502/Zm00001d003846/Zm00001d003913/Zm00001d004051/Zm00001d004119/Zm00001d005062/Zm00001d005373/Zm00001d006107/Zm00001d006214/Zm00001d006588/Zm00001d006939/Zm00001d007065/Zm00001d007943/Zm00001d008345/Zm00001d008613/Zm00001d009850/Zm00001d012017/Zm00001d012618/Zm00001d012893/Zm00001d012930/Zm00001d013642/Zm00001d014033/Zm00001d014090/Zm00001d0…	-/-/-/-/-/high chlorophyll fluorescence106/-/-/-/-/pyruvate dehydrogenase3/-/-/-/-/-/-/-/importin1/-/-/-/-/-/-/chaperonin 1/-/-/-/-/-/vacuolar protein sorting2/-/-/-/LON peptidase1/-/-/-/-/-/-/signal recognition particle receptor homolog1/-/-/-/-/-/-/-/-/-/-/-/thylakoid assembly4/-/-/-/-/-/-/-/-/-/-/-/-/-/-/-/-/-/-/-/-/-/-/-/-/-/-/-/-/-/-/-/-/-/-/-/-/-/-/-/-	95
BP	GO:0018205	peptidyl-lysine modification	70/3483	229/22306	8.81127e-09	5.0566e-06	Zm00001d002938/Zm00001d003462/Zm00001d004739/Zm00001d005445/Zm00001d005516/Zm00001d005563/Zm00001d006323/Zm00001d006369/Zm00001d006918/Zm00001d007151/Zm00001d008763/Zm00001d009236/Zm00001d009723/Zm00001d010497/Zm00001d010646/Zm00001d010974/Zm00001d011158/Zm00001d011490/Zm00001d012042/Zm00001d012044/Zm00001d012751/Zm00001d012797/Zm00001d015120/Zm00001d015265/Zm00001d015765/Zm00001d016804/Zm00001d0…	set domain gene107/LIP1/-/-/-/sdg110b/-/set domain gene116/-/-/-/-/plastid transcriptionally active14/-/set domain gene105/PHD-transcription factor 17/PHD-transcription factor 10/arabidopsis trithorax homolog5/small ubiquitin-related modifier1a/small ubiquitin-related modifier1b/Homeobox-transcription factor 9/-/-/Homeobox-transcription factor 28/-/-/-/GNAT-transcription factor 26/-/GNAT-transcri…	70
BP	GO:0016569	covalent chromatin modification	80/3483	276/22306	1.16673e-08	5.0566e-06	Zm00001d002938/Zm00001d004383/Zm00001d004739/Zm00001d005445/Zm00001d005516/Zm00001d005563/Zm00001d006323/Zm00001d006369/Zm00001d006580/Zm00001d006789/Zm00001d006918/Zm00001d008429/Zm00001d008763/Zm00001d010206/Zm00001d010497/Zm00001d010646/Zm00001d011158/Zm00001d011490/Zm00001d012030/Zm00001d012751/Zm00001d014900/Zm00001d015120/Zm00001d015228/Zm00001d015265/Zm00001d015765/Zm00001d016804/Zm00001d0…	set domain gene107/leunig-related6/-/-/-/sdg110b/-/set domain gene116/-/-/-/-/-/-/-/set domain gene105/PHD-transcription factor 10/arabidopsis trithorax homolog5/-/Homeobox-transcription factor 9/PHD-transcription factor 29/-/-/Homeobox-transcription factor 28/-/-/JUMONJI-transcription factor 15/-/GNAT-transcription factor 26/-/-/GNAT-transcription factor 32/set domain gene128/set domain gene110a…	80
BP	GO:0016570	histone modification	80/3483	276/22306	1.16673e-08	5.0566e-06	Zm00001d002938/Zm00001d004383/Zm00001d004739/Zm00001d005445/Zm00001d005516/Zm00001d005563/Zm00001d006323/Zm00001d006369/Zm00001d006580/Zm00001d006789/Zm00001d006918/Zm00001d008429/Zm00001d008763/Zm00001d010206/Zm00001d010497/Zm00001d010646/Zm00001d011158/Zm00001d011490/Zm00001d012030/Zm00001d012751/Zm00001d014900/Zm00001d015120/Zm00001d015228/Zm00001d015265/Zm00001d015765/Zm00001d016804/Zm00001d0…	set domain gene107/leunig-related6/-/-/-/sdg110b/-/set domain gene116/-/-/-/-/-/-/-/set domain gene105/PHD-transcription factor 10/arabidopsis trithorax homolog5/-/Homeobox-transcription factor 9/PHD-transcription factor 29/-/-/Homeobox-transcription factor 28/-/-/JUMONJI-transcription factor 15/-/GNAT-transcription factor 26/-/-/GNAT-transcription factor 32/set domain gene128/set domain gene110a…	80
BP	GO:0048193	Golgi vesicle transport	83/3483	302/22306	8.54072e-08	2.68062e-05	Zm00001d003460/Zm00001d003904/Zm00001d004396/Zm00001d004543/Zm00001d004639/Zm00001d004640/Zm00001d004655/Zm00001d004667/Zm00001d005062/Zm00001d005902/Zm00001d006249/Zm00001d006433/Zm00001d006939/Zm00001d006951/Zm00001d007067/Zm00001d007075/Zm00001d007585/Zm00001d007760/Zm00001d009816/Zm00001d010537/Zm00001d011266/Zm00001d012634/Zm00001d012760/Zm00001d012851/Zm00001d012853/Zm00001d013049/Zm00001d0…	-/-/-/-/-/-/-/-/-/-/-/-/-/-/-/-/-/-/-/-/-/-/-/-/-/-/-/vesicular transport protein1/-/-/-/-/ypt homolog4/-/-/-/-/-/-/-/-/-/-/-/-/-/-/-/-/-/-/-/-/roothair defective1/GRMZM2G039373/-/-/-/-/-/-/-/-/-/-/-/-/-/-/-/-/-/-/-/-/-/-/-/-/-/-/-/-	83
BP	GO:0006397	mRNA processing	114/3483	454/22306	8.65914e-08	2.68062e-05	Zm00001d001951/Zm00001d002141/Zm00001d003014/Zm00001d003984/Zm00001d004154/Zm00001d004669/Zm00001d004936/Zm00001d004993/Zm00001d005012/Zm00001d005406/Zm00001d006294/Zm00001d006350/Zm00001d006459/Zm00001d006906/Zm00001d007043/Zm00001d007572/Zm00001d007632/Zm00001d007635/Zm00001d007770/Zm00001d007784/Zm00001d007898/Zm00001d008559/Zm00001d009452/Zm00001d009618/Zm00001d010901/Zm00001d011150/Zm00001d0…	-/-/-/-/-/-/-/-/-/-/-/-/-/-/-/CRM family member3/-/-/-/C3H-transcription factor 34/-/chloroplast RNA splicing2/-/what's this factor1/-/-/-/-/-/-/-/-/-/-/-/-/-/-/-/-/organelle transcript processing51/-/-/-/crs2 associated factor1/-/-/chloroplast RNA processing1/-/-/-/-/-/-/-/-/-/high chlorophyll fluorescence3/-/-/-/-/-/-/-/-/-/-/-/-/-/-/-/-/-/-/-/-/crs2 associated factor2/-/-/-/-/-/-/-/-/-/-/-/-/-…	114
BP	GO:0006605	protein targeting	80/3483	293/22306	1.95476e-07	5.29495e-05	Zm00001d000349/Zm00001d001882/Zm00001d002462/Zm00001d002534/Zm00001d003502/Zm00001d003846/Zm00001d003913/Zm00001d004051/Zm00001d004119/Zm00001d005062/Zm00001d005373/Zm00001d006102/Zm00001d006107/Zm00001d006214/Zm00001d006588/Zm00001d006939/Zm00001d008613/Zm00001d012017/Zm00001d012893/Zm00001d012930/Zm00001d013642/Zm00001d014090/Zm00001d014303/Zm00001d014516/Zm00001d015473/Zm00001d015837/Zm00001d0…	-/-/-/-/-/-/high chlorophyll fluorescence106/-/-/-/-/-/pyruvate dehydrogenase3/-/-/-/-/-/-/-/-/chaperonin 1/-/-/-/-/-/-/vacuolar protein sorting2/-/LON peptidase1/-/-/-/-/-/-/signal recognition particle receptor homolog1/-/-/-/-/-/-/-/-/-/thylakoid assembly4/-/-/-/-/-/-/-/-/-/-/-/-/-/-/-/-/-/-/-/-/-/-/-/-/-/-/-/-/-/-/-/-	80
BP	GO:0070646	protein modification by small protein removal	46/3483	141/22306	3.78592e-07	9.11566e-05	Zm00001d000312/Zm00001d000313/Zm00001d001897/Zm00001d002027/Zm00001d004659/Zm00001d007096/Zm00001d007151/Zm00001d007904/Zm00001d008743/Zm00001d009236/Zm00001d010710/Zm00001d011512/Zm00001d012030/Zm00001d012361/Zm00001d012797/Zm00001d013351/Zm00001d014512/Zm00001d014761/Zm00001d015364/Zm00001d016165/Zm00001d018859/Zm00001d020157/Zm00001d023520/Zm00001d023640/Zm00001d025359/Zm00001d025397/Zm00001d0…	-/-/-/-/-/-/-/-/-/-/-/-/-/-/-/-/-/-/-/-/-/-/-/-/-/-/-/-/-/-/-/-/-/-/-/-/-/-/-/-/-/-/-/-/-/-	46
BP	GO:0016579	protein deubiquitination	39/3483	115/22306	9.47447e-07	0.000205312	Zm00001d000312/Zm00001d000313/Zm00001d001897/Zm00001d004659/Zm00001d007096/Zm00001d007904/Zm00001d008743/Zm00001d010710/Zm00001d011512/Zm00001d012030/Zm00001d012361/Zm00001d013351/Zm00001d014512/Zm00001d014761/Zm00001d015364/Zm00001d016165/Zm00001d018859/Zm00001d020157/Zm00001d023520/Zm00001d023640/Zm00001d025359/Zm00001d025397/Zm00001d025570/Zm00001d025998/Zm00001d027807/Zm00001d028177/Zm00001d0…	-/-/-/-/-/-/-/-/-/-/-/-/-/-/-/-/-/-/-/-/-/-/-/-/-/-/-/-/-/-/-/-/-/-/-/-/-/-/-	39
BP	GO:0034067	protein localization to Golgi apparatus	9/3483	11/22306	2.22454e-06	0.000438235	Zm00001d011266/Zm00001d030935/Zm00001d035088/Zm00001d035089/Zm00001d044367/Zm00001d046973/Zm00001d047074/Zm00001d052978/Zm00001d053262	-/-/-/-/-/-/-/-/-	9
BP	GO:0044093	positive regulation of molecular function	78/3483	303/22306	3.33511e-06	0.000602265	Zm00001d001978/Zm00001d004639/Zm00001d004640/Zm00001d005064/Zm00001d005812/Zm00001d005902/Zm00001d006192/Zm00001d006602/Zm00001d007081/Zm00001d007943/Zm00001d008330/Zm00001d011855/Zm00001d011877/Zm00001d012126/Zm00001d013301/Zm00001d013840/Zm00001d013891/Zm00001d014913/Zm00001d015227/Zm00001d015228/Zm00001d016002/Zm00001d016034/Zm00001d017392/Zm00001d017525/Zm00001d018657/Zm00001d019287/Zm00001d0…	-/-/-/-/-/-/-/-/-/-/-/-/-/-/-/-/-/-/-/-/-/cell division cycle202/-/-/-/-/-/-/-/-/-/-/-/-/-/-/-/-/-/-/-/MAP kinase kinase kinase11/-/-/-/-/-/-/-/acidic ribosomal protein P1a/-/-/-/-/-/-/-/-/-/-/-/-/-/-/-/-/-/-/-/autophagy13a/-/chaperonin10/-/-/-/-/-/-	78
BP	GO:0072657	protein localization to membrane	52/3483	179/22306	3.68682e-06	0.000607361	Zm00001d000349/Zm00001d001882/Zm00001d002534/Zm00001d003502/Zm00001d003846/Zm00001d003913/Zm00001d004051/Zm00001d004119/Zm00001d004740/Zm00001d006102/Zm00001d006588/Zm00001d011266/Zm00001d012017/Zm00001d012861/Zm00001d012930/Zm00001d015837/Zm00001d016797/Zm00001d017847/Zm00001d022038/Zm00001d022172/Zm00001d022502/Zm00001d023220/Zm00001d026600/Zm00001d027293/Zm00001d027699/Zm00001d028262/Zm00001d0…	-/-/-/-/-/high chlorophyll fluorescence106/-/-/-/-/-/-/-/-/-/-/-/-/-/-/-/-/-/signal recognition particle receptor homolog1/-/-/-/-/-/-/thylakoid assembly4/-/-/-/-/-/-/-/-/-/-/-/-/-/-/-/-/-/-/-/-/-	52
BP	GO:0090150	establishment of protein localization to membrane	44/3483	143/22306	3.92388e-06	0.000607361	Zm00001d000349/Zm00001d001882/Zm00001d002534/Zm00001d003502/Zm00001d003846/Zm00001d003913/Zm00001d004051/Zm00001d004119/Zm00001d006102/Zm00001d006588/Zm00001d011266/Zm00001d012017/Zm00001d012861/Zm00001d012930/Zm00001d015837/Zm00001d017847/Zm00001d022038/Zm00001d022172/Zm00001d022502/Zm00001d023220/Zm00001d026600/Zm00001d027293/Zm00001d027699/Zm00001d028619/Zm00001d033317/Zm00001d034805/Zm00001d0…	-/-/-/-/-/high chlorophyll fluorescence106/-/-/-/-/-/-/-/-/-/-/-/-/-/-/-/signal recognition particle receptor homolog1/-/-/thylakoid assembly4/-/-/-/-/-/-/-/-/-/-/-/-/-/-/-/-/-/-/-	44
BP	GO:0043085	positive regulation of catalytic activity	73/3483	283/22306	6.26033e-06	0.000904409	Zm00001d001978/Zm00001d004639/Zm00001d004640/Zm00001d005064/Zm00001d005812/Zm00001d005902/Zm00001d006192/Zm00001d006602/Zm00001d007081/Zm00001d008330/Zm00001d011855/Zm00001d011877/Zm00001d012126/Zm00001d013301/Zm00001d013840/Zm00001d013891/Zm00001d015227/Zm00001d015228/Zm00001d016002/Zm00001d016034/Zm00001d017392/Zm00001d017525/Zm00001d019287/Zm00001d019314/Zm00001d019681/Zm00001d020158/Zm00001d0…	-/-/-/-/-/-/-/-/-/-/-/-/-/-/-/-/-/-/-/cell division cycle202/-/-/-/-/-/-/-/-/-/-/-/-/-/-/-/-/-/MAP kinase kinase kinase11/-/-/-/-/-/-/acidic ribosomal protein P1a/-/-/-/-/-/-/-/-/-/-/-/-/-/-/-/-/-/-/-/autophagy13a/-/chaperonin10/-/-/-/-/-/-	73
BP	GO:0007010	cytoskeleton organization	82/3483	332/22306	1.03947e-05	0.00140783	Zm00001d002186/Zm00001d002190/Zm00001d005269/Zm00001d006372/Zm00001d006533/Zm00001d007806/Zm00001d007953/Zm00001d008216/Zm00001d008654/Zm00001d008906/Zm00001d009780/Zm00001d011563/Zm00001d011854/Zm00001d012525/Zm00001d012559/Zm00001d012966/Zm00001d013141/Zm00001d013389/Zm00001d013891/Zm00001d014124/Zm00001d015020/Zm00001d015096/Zm00001d015692/Zm00001d017106/Zm00001d017961/Zm00001d018004/Zm00001d0…	divergent spindle1/severe depolymerization of actin1/-/actin depolymerizing factor2/-/-/-/-/-/-/gamma-tubulin1/-/-/-/-/-/-/-/-/-/-/-/-/-/-/Rho-related protein from plants 1/-/myosin2/-/brick1/kinesin-related protein11/-/-/-/-/-/brick3/-/-/discordia1/-/-/-/-/LIM-transcription factor 1/-/-/-/-/-/-/-/-/reaction to X. oryzae1/-/-/-/LIM-transcription factor 12/-/-/-/-/-/-/-/-/-/-/-/-/Rho-related prote…	82
BP	GO:0043161	proteasome-mediated ubiquitin-dependent protein catabolic process	80/3483	324/22306	1.33931e-05	0.00161426	Zm00001d000224/Zm00001d000390/Zm00001d000408/Zm00001d001962/Zm00001d002373/Zm00001d003112/Zm00001d003207/Zm00001d003257/Zm00001d004979/Zm00001d005072/Zm00001d006011/Zm00001d007357/Zm00001d007640/Zm00001d007650/Zm00001d008428/Zm00001d008613/Zm00001d009745/Zm00001d010305/Zm00001d010454/Zm00001d010493/Zm00001d010892/Zm00001d012219/Zm00001d012546/Zm00001d012643/Zm00001d013351/Zm00001d014124/Zm00001d0…	-/-/-/-/-/-/-/-/-/umc255a/-/-/-/-/-/-/-/-/-/-/-/-/-/-/-/-/-/-/-/-/-/-/-/-/-/-/-/-/-/-/-/-/-/-/-/-/-/-/-/-/-/-/-/-/-/-/-/-/-/-/-/-/-/-/ubiquitin conjugating enzyme2/-/-/-/-/-/-/-/-/-/-/-/-/-/-/-	80
BP	GO:0006325	chromatin organization	113/3483	495/22306	1.34087e-05	0.00161426	Zm00001d002656/Zm00001d002938/Zm00001d004383/Zm00001d004739/Zm00001d005445/Zm00001d005516/Zm00001d005563/Zm00001d006323/Zm00001d006369/Zm00001d006580/Zm00001d006789/Zm00001d006798/Zm00001d006918/Zm00001d007089/Zm00001d007943/Zm00001d008429/Zm00001d008614/Zm00001d008763/Zm00001d010206/Zm00001d010497/Zm00001d010646/Zm00001d011158/Zm00001d011252/Zm00001d011490/Zm00001d012030/Zm00001d012423/Zm00001d0…	-/set domain gene107/leunig-related6/-/-/-/sdg110b/-/set domain gene116/-/-/-/-/-/-/-/-/-/-/-/set domain gene105/PHD-transcription factor 10/MYB-related-transcription factor 101/arabidopsis trithorax homolog5/-/-/H4C7/Homeobox-transcription factor 9/-/-/PHD-transcription factor 29/brahma1/-/-/Homeobox-transcription factor 28/-/-/-/JUMONJI-transcription factor 15/-/-/GNAT-transcription factor 26/-…	113
BP	GO:0051128	regulation of cellular component organization	83/3483	342/22306	1.84614e-05	0.00207357	Zm00001d002243/Zm00001d002662/Zm00001d004639/Zm00001d004640/Zm00001d005064/Zm00001d005269/Zm00001d005502/Zm00001d005902/Zm00001d007585/Zm00001d007806/Zm00001d007940/Zm00001d007943/Zm00001d008654/Zm00001d010656/Zm00001d011680/Zm00001d012052/Zm00001d012560/Zm00001d012751/Zm00001d013301/Zm00001d013440/Zm00001d014913/Zm00001d015265/Zm00001d015886/Zm00001d016439/Zm00001d017050/Zm00001d017106/Zm00001d0…	-/cyclin8/-/-/-/-/-/-/-/-/-/-/-/cyclin1/p15 (PC4 Sub1)-transcription factor 3/-/cyclin7/Homeobox-transcription factor 9/-/-/-/Homeobox-transcription factor 28/-/-/-/-/Rho-related protein from plants 1/GNAT-transcription factor 26/-/brick1/-/-/-/-/-/eukaryotic translation initiation factor 5A/fowlpox viral protein homolog1/-/-/chitin synthase homolog1/-/-/-/-/-/Sigma70-like-transcription factor 3/…	83
BP	GO:0017038	protein import	51/3483	184/22306	1.91377e-05	0.00207357	Zm00001d002462/Zm00001d003846/Zm00001d003913/Zm00001d004051/Zm00001d005373/Zm00001d006214/Zm00001d006588/Zm00001d007065/Zm00001d008345/Zm00001d009850/Zm00001d012017/Zm00001d012930/Zm00001d014033/Zm00001d014090/Zm00001d015837/Zm00001d017847/Zm00001d019335/Zm00001d021301/Zm00001d021893/Zm00001d022536/Zm00001d023220/Zm00001d025453/Zm00001d026263/Zm00001d027699/Zm00001d028262/Zm00001d028485/Zm00001d0…	-/-/high chlorophyll fluorescence106/-/-/-/-/-/-/importin1/-/-/-/chaperonin 1/-/-/-/LON peptidase1/-/-/-/-/-/-/-/-/-/-/-/-/-/thylakoid assembly4/-/-/-/-/-/-/-/-/-/-/-/-/-/-/-/-/-/-/-	51
BP	GO:0010498	proteasomal protein catabolic process	84/3483	350/22306	2.54976e-05	0.00263111	Zm00001d000224/Zm00001d000390/Zm00001d000408/Zm00001d001962/Zm00001d002373/Zm00001d002856/Zm00001d003112/Zm00001d003207/Zm00001d003257/Zm00001d004979/Zm00001d005072/Zm00001d006011/Zm00001d007357/Zm00001d007640/Zm00001d007650/Zm00001d008428/Zm00001d008613/Zm00001d009745/Zm00001d010305/Zm00001d010454/Zm00001d010493/Zm00001d010892/Zm00001d012219/Zm00001d012546/Zm00001d012643/Zm00001d013351/Zm00001d0…	-/-/-/-/-/-/-/-/-/-/umc255a/-/-/-/-/-/-/-/-/-/-/-/-/-/-/-/-/-/-/-/-/-/-/-/-/-/-/-/-/-/-/-/-/-/-/-/-/-/-/-/-/-/-/-/-/-/-/-/-/-/-/-/-/-/-/-/-/ubiquitin conjugating enzyme2/-/-/-/-/-/-/-/-/-/-/-/-/-/-/-/-	84
BP	GO:0006413	translational initiation	53/3483	197/22306	3.26622e-05	0.00308295	Zm00001d000300/Zm00001d002366/Zm00001d003198/Zm00001d003556/Zm00001d004676/Zm00001d006573/Zm00001d007940/Zm00001d009749/Zm00001d011492/Zm00001d011873/Zm00001d013692/Zm00001d014246/Zm00001d014255/Zm00001d014337/Zm00001d014575/Zm00001d014673/Zm00001d016835/Zm00001d018450/Zm00001d020571/Zm00001d020603/Zm00001d021668/Zm00001d021710/Zm00001d021741/Zm00001d021815/Zm00001d022042/Zm00001d022433/Zm00001d0…	eucaryotic translation initiation factor5/-/-/-/-/-/-/-/-/-/-/-/-/-/-/eucaryotic initiation factor4/-/-/-/-/translation initiation factor1/GRMZM2G158062/-/elongation initiation factor2/eukaryotic translation initiation factor 5A/-/-/-/-/-/-/-/-/-/-/-/-/-/eukaryotic initiation factor3/-/eucaryotic initiation factor6/-/-/-/-/-/-/-/-/-/-/-/-	53
BP	GO:0043543	protein acylation	42/3483	145/22306	3.27217e-05	0.00308295	Zm00001d002534/Zm00001d005516/Zm00001d006102/Zm00001d006918/Zm00001d008763/Zm00001d010497/Zm00001d011158/Zm00001d015120/Zm00001d015765/Zm00001d018218/Zm00001d019343/Zm00001d020182/Zm00001d021931/Zm00001d022038/Zm00001d022338/Zm00001d024088/Zm00001d024953/Zm00001d025108/Zm00001d025705/Zm00001d026391/Zm00001d026600/Zm00001d027326/Zm00001d027460/Zm00001d028619/Zm00001d029473/Zm00001d031291/Zm00001d0…	-/-/-/-/-/-/PHD-transcription factor 10/-/-/GNAT-transcription factor 26/GNAT-transcription factor 32/histone acetyltransferase1/-/-/-/-/-/-/-/GNAT-transcription factor 43/-/actin related protein like4/-/-/-/-/-/PHD-transcription factor 38/-/-/-/-/-/PHD-transcription factor 27/-/-/-/-/-/-/-/-	42
BP	GO:0006414	translational elongation	35/3483	114/22306	3.85257e-05	0.00340461	Zm00001d002822/Zm00001d004979/Zm00001d006596/Zm00001d007940/Zm00001d010294/Zm00001d010431/Zm00001d013523/Zm00001d013673/Zm00001d014679/Zm00001d016407/Zm00001d022042/Zm00001d022134/Zm00001d023340/Zm00001d025100/Zm00001d025948/Zm00001d026578/Zm00001d033557/Zm00001d034524/Zm00001d034575/Zm00001d034797/Zm00001d034826/Zm00001d035087/Zm00001d037422/Zm00001d037873/Zm00001d037875/Zm00001d037905/Zm00001d0…	-/-/-/-/-/-/-/-/acidic ribosomal protein P3/-/eukaryotic translation initiation factor 5A/-/-/-/-/-/-/-/-/-/-/acidic ribosomal protein P1a/-/elongation factor alpha3/elongation factor alpha2/elongation factor alpha1/-/-/-/-/-/-/-/-/-	35
BP	GO:0006913	nucleocytoplasmic transport	46/3483	165/22306	4.08491e-05	0.00340461	Zm00001d002190/Zm00001d007065/Zm00001d008259/Zm00001d008345/Zm00001d009850/Zm00001d010500/Zm00001d012030/Zm00001d014033/Zm00001d014280/Zm00001d019335/Zm00001d020011/Zm00001d021590/Zm00001d021893/Zm00001d022000/Zm00001d022125/Zm00001d022343/Zm00001d022536/Zm00001d023264/Zm00001d026263/Zm00001d028262/Zm00001d028695/Zm00001d029133/Zm00001d030340/Zm00001d030694/Zm00001d030774/Zm00001d031627/Zm00001d0…	severe depolymerization of actin1/-/-/-/importin1/-/-/-/-/-/-/-/-/-/-/-/-/-/-/-/-/-/-/-/-/-/-/-/-/-/-/-/-/-/-/-/-/-/-/-/-/-/-/-/-/-	46
BP	GO:0051169	nuclear transport	46/3483	165/22306	4.08491e-05	0.00340461	Zm00001d002190/Zm00001d007065/Zm00001d008259/Zm00001d008345/Zm00001d009850/Zm00001d010500/Zm00001d012030/Zm00001d014033/Zm00001d014280/Zm00001d019335/Zm00001d020011/Zm00001d021590/Zm00001d021893/Zm00001d022000/Zm00001d022125/Zm00001d022343/Zm00001d022536/Zm00001d023264/Zm00001d026263/Zm00001d028262/Zm00001d028695/Zm00001d029133/Zm00001d030340/Zm00001d030694/Zm00001d030774/Zm00001d031627/Zm00001d0…	severe depolymerization of actin1/-/-/-/importin1/-/-/-/-/-/-/-/-/-/-/-/-/-/-/-/-/-/-/-/-/-/-/-/-/-/-/-/-/-/-/-/-/-/-/-/-/-/-/-/-/-	46
BP	GO:0031503	protein-containing complex localization	31/3483	98/22306	5.55578e-05	0.00445903	Zm00001d002190/Zm00001d007760/Zm00001d008259/Zm00001d010500/Zm00001d012030/Zm00001d013049/Zm00001d014280/Zm00001d018060/Zm00001d019104/Zm00001d019287/Zm00001d020011/Zm00001d021590/Zm00001d021828/Zm00001d022000/Zm00001d022125/Zm00001d022343/Zm00001d023839/Zm00001d026263/Zm00001d028695/Zm00001d029133/Zm00001d030774/Zm00001d033303/Zm00001d034680/Zm00001d034914/Zm00001d040389/Zm00001d043861/Zm00001d0…	severe depolymerization of actin1/-/-/-/-/-/-/-/-/-/-/-/-/-/-/-/-/-/-/-/-/roothair defective1/-/-/-/-/-/-/-/-/-	31
BP	GO:0007030	Golgi organization	20/3483	53/22306	7.55358e-05	0.00584593	Zm00001d004639/Zm00001d004640/Zm00001d005902/Zm00001d006951/Zm00001d009816/Zm00001d012653/Zm00001d012760/Zm00001d012851/Zm00001d013301/Zm00001d013314/Zm00001d018057/Zm00001d031637/Zm00001d032099/Zm00001d035889/Zm00001d037163/Zm00001d043502/Zm00001d046973/Zm00001d048902/Zm00001d049155/Zm00001d054076	-/-/-/-/-/-/-/-/-/vesicular transport protein1/-/-/-/-/-/-/-/-/-/-	20
BP	GO:0000819	sister chromatid segregation	36/3483	125/22306	0.000131258	0.00815731	Zm00001d002056/Zm00001d002154/Zm00001d003151/Zm00001d006499/Zm00001d007233/Zm00001d007585/Zm00001d007679/Zm00001d007943/Zm00001d009780/Zm00001d014913/Zm00001d018657/Zm00001d019343/Zm00001d019789/Zm00001d021635/Zm00001d023279/Zm00001d023839/Zm00001d024094/Zm00001d025789/Zm00001d028538/Zm00001d031847/Zm00001d032575/Zm00001d034239/Zm00001d037377/Zm00001d037979/Zm00001d037981/Zm00001d039132/Zm00001d0…	-/meiotic recombination protein 11 homolog A/-/-/-/-/-/-/gamma-tubulin1/-/-/GNAT-transcription factor 32/-/-/-/-/-/-/-/-/-/-/-/-/-/-/-/-/-/-/centromere protein C 1/-/-/-/-/-	36
BP	GO:0051247	positive regulation of protein metabolic process	51/3483	197/22306	0.000132166	0.00815731	Zm00001d000213/Zm00001d001978/Zm00001d003207/Zm00001d003611/Zm00001d005064/Zm00001d006011/Zm00001d007940/Zm00001d012751/Zm00001d015265/Zm00001d015886/Zm00001d016034/Zm00001d017392/Zm00001d017525/Zm00001d019681/Zm00001d020158/Zm00001d021584/Zm00001d021716/Zm00001d021815/Zm00001d022042/Zm00001d022231/Zm00001d023230/Zm00001d023520/Zm00001d025449/Zm00001d025750/Zm00001d026030/Zm00001d027790/Zm00001d0…	-/-/-/-/-/-/-/Homeobox-transcription factor 9/Homeobox-transcription factor 28/-/cell division cycle202/-/-/-/-/-/chloroplast RNA processing1/elongation initiation factor2/eukaryotic translation initiation factor 5A/-/-/-/-/-/-/-/-/MAP kinase kinase kinase11/-/-/-/-/-/acidic ribosomal protein P1a/-/-/Homeobox-transcription factor 92/-/-/-/-/-/-/-/-/-/autophagy13a/-/-/autophagy11a/-	51
BP	GO:0007062	sister chromatid cohesion	21/3483	59/22306	0.000134577	0.00815731	Zm00001d002154/Zm00001d003151/Zm00001d007233/Zm00001d007679/Zm00001d007943/Zm00001d014913/Zm00001d018657/Zm00001d019343/Zm00001d023279/Zm00001d024094/Zm00001d025789/Zm00001d028538/Zm00001d031847/Zm00001d032575/Zm00001d037377/Zm00001d039132/Zm00001d042505/Zm00001d042706/Zm00001d042708/Zm00001d045783/Zm00001d052197	meiotic recombination protein 11 homolog A/-/-/-/-/-/-/GNAT-transcription factor 32/-/-/-/-/-/-/-/-/-/-/-/-/-	21
BP	GO:0072666	establishment of protein localization to vacuole	20/3483	55/22306	0.000137598	0.00815731	Zm00001d005062/Zm00001d006939/Zm00001d008613/Zm00001d012618/Zm00001d014303/Zm00001d018057/Zm00001d018382/Zm00001d030935/Zm00001d031942/Zm00001d033488/Zm00001d035088/Zm00001d035089/Zm00001d041948/Zm00001d043112/Zm00001d043269/Zm00001d047074/Zm00001d048239/Zm00001d052028/Zm00001d053262/Zm00001d053371	-/-/-/-/-/-/vacuolar protein sorting2/-/-/-/-/-/-/-/-/-/-/-/-/-	20
BP	GO:0006475	internal protein amino acid acetylation	28/3483	89/22306	0.000138442	0.00815731	Zm00001d005516/Zm00001d006918/Zm00001d008763/Zm00001d010497/Zm00001d011158/Zm00001d015120/Zm00001d015765/Zm00001d018218/Zm00001d019343/Zm00001d020182/Zm00001d021931/Zm00001d022338/Zm00001d024088/Zm00001d024953/Zm00001d025108/Zm00001d025705/Zm00001d027326/Zm00001d027460/Zm00001d029473/Zm00001d031291/Zm00001d034434/Zm00001d036673/Zm00001d039608/Zm00001d041378/Zm00001d045755/Zm00001d046579/Zm00001d0…	-/-/-/-/PHD-transcription factor 10/-/-/GNAT-transcription factor 26/GNAT-transcription factor 32/histone acetyltransferase1/-/-/-/-/-/-/actin related protein like4/-/-/-/-/PHD-transcription factor 38/-/-/PHD-transcription factor 27/-/-/-	28
BP	GO:0016573	histone acetylation	28/3483	89/22306	0.000138442	0.00815731	Zm00001d005516/Zm00001d006918/Zm00001d008763/Zm00001d010497/Zm00001d011158/Zm00001d015120/Zm00001d015765/Zm00001d018218/Zm00001d019343/Zm00001d020182/Zm00001d021931/Zm00001d022338/Zm00001d024088/Zm00001d024953/Zm00001d025108/Zm00001d025705/Zm00001d027326/Zm00001d027460/Zm00001d029473/Zm00001d031291/Zm00001d034434/Zm00001d036673/Zm00001d039608/Zm00001d041378/Zm00001d045755/Zm00001d046579/Zm00001d0…	-/-/-/-/PHD-transcription factor 10/-/-/GNAT-transcription factor 26/GNAT-transcription factor 32/histone acetyltransferase1/-/-/-/-/-/-/actin related protein like4/-/-/-/-/PHD-transcription factor 38/-/-/PHD-transcription factor 27/-/-/-	28
BP	GO:0018393	internal peptidyl-lysine acetylation	28/3483	89/22306	0.000138442	0.00815731	Zm00001d005516/Zm00001d006918/Zm00001d008763/Zm00001d010497/Zm00001d011158/Zm00001d015120/Zm00001d015765/Zm00001d018218/Zm00001d019343/Zm00001d020182/Zm00001d021931/Zm00001d022338/Zm00001d024088/Zm00001d024953/Zm00001d025108/Zm00001d025705/Zm00001d027326/Zm00001d027460/Zm00001d029473/Zm00001d031291/Zm00001d034434/Zm00001d036673/Zm00001d039608/Zm00001d041378/Zm00001d045755/Zm00001d046579/Zm00001d0…	-/-/-/-/PHD-transcription factor 10/-/-/GNAT-transcription factor 26/GNAT-transcription factor 32/histone acetyltransferase1/-/-/-/-/-/-/actin related protein like4/-/-/-/-/PHD-transcription factor 38/-/-/PHD-transcription factor 27/-/-/-	28
BP	GO:0018394	peptidyl-lysine acetylation	28/3483	89/22306	0.000138442	0.00815731	Zm00001d005516/Zm00001d006918/Zm00001d008763/Zm00001d010497/Zm00001d011158/Zm00001d015120/Zm00001d015765/Zm00001d018218/Zm00001d019343/Zm00001d020182/Zm00001d021931/Zm00001d022338/Zm00001d024088/Zm00001d024953/Zm00001d025108/Zm00001d025705/Zm00001d027326/Zm00001d027460/Zm00001d029473/Zm00001d031291/Zm00001d034434/Zm00001d036673/Zm00001d039608/Zm00001d041378/Zm00001d045755/Zm00001d046579/Zm00001d0…	-/-/-/-/PHD-transcription factor 10/-/-/GNAT-transcription factor 26/GNAT-transcription factor 32/histone acetyltransferase1/-/-/-/-/-/-/actin related protein like4/-/-/-/-/PHD-transcription factor 38/-/-/PHD-transcription factor 27/-/-/-	28
BP	GO:0032507	maintenance of protein location in cell	14/3483	32/22306	0.000143045	0.00815731	Zm00001d004655/Zm00001d013421/Zm00001d021306/Zm00001d028596/Zm00001d030935/Zm00001d035088/Zm00001d035089/Zm00001d036443/Zm00001d038754/Zm00001d040178/Zm00001d045323/Zm00001d046973/Zm00001d047074/Zm00001d053262	-/-/-/-/-/-/-/-/-/-/double B-box zinc finger protein11/-/-/-	14
BP	GO:0045185	maintenance of protein location	14/3483	32/22306	0.000143045	0.00815731	Zm00001d004655/Zm00001d013421/Zm00001d021306/Zm00001d028596/Zm00001d030935/Zm00001d035088/Zm00001d035089/Zm00001d036443/Zm00001d038754/Zm00001d040178/Zm00001d045323/Zm00001d046973/Zm00001d047074/Zm00001d053262	-/-/-/-/-/-/-/-/-/-/double B-box zinc finger protein11/-/-/-	14
BP	GO:0032270	positive regulation of cellular protein metabolic process	50/3483	193/22306	0.000150056	0.0082684	Zm00001d000213/Zm00001d001978/Zm00001d003207/Zm00001d003611/Zm00001d005064/Zm00001d007940/Zm00001d012751/Zm00001d015265/Zm00001d015886/Zm00001d016034/Zm00001d017392/Zm00001d017525/Zm00001d019681/Zm00001d020158/Zm00001d021584/Zm00001d021716/Zm00001d021815/Zm00001d022042/Zm00001d022231/Zm00001d023230/Zm00001d023520/Zm00001d025449/Zm00001d025750/Zm00001d026030/Zm00001d027790/Zm00001d028285/Zm00001d0…	-/-/-/-/-/-/Homeobox-transcription factor 9/Homeobox-transcription factor 28/-/cell division cycle202/-/-/-/-/-/chloroplast RNA processing1/elongation initiation factor2/eukaryotic translation initiation factor 5A/-/-/-/-/-/-/-/-/MAP kinase kinase kinase11/-/-/-/-/-/acidic ribosomal protein P1a/-/-/Homeobox-transcription factor 92/-/-/-/-/-/-/-/-/-/autophagy13a/-/-/autophagy11a/-	50
BP	GO:0006473	protein acetylation	31/3483	103/22306	0.000156158	0.0082684	Zm00001d005516/Zm00001d006918/Zm00001d008763/Zm00001d010497/Zm00001d011158/Zm00001d015120/Zm00001d015765/Zm00001d018218/Zm00001d019343/Zm00001d020182/Zm00001d021931/Zm00001d022338/Zm00001d024088/Zm00001d024953/Zm00001d025108/Zm00001d025705/Zm00001d026391/Zm00001d027326/Zm00001d027460/Zm00001d029473/Zm00001d031291/Zm00001d034434/Zm00001d036673/Zm00001d038006/Zm00001d039608/Zm00001d041378/Zm00001d0…	-/-/-/-/PHD-transcription factor 10/-/-/GNAT-transcription factor 26/GNAT-transcription factor 32/histone acetyltransferase1/-/-/-/-/-/-/GNAT-transcription factor 43/actin related protein like4/-/-/-/-/PHD-transcription factor 38/-/-/-/PHD-transcription factor 27/-/-/-/-	31
BP	GO:0018107	peptidyl-threonine phosphorylation	23/3483	68/22306	0.000160255	0.0082684	Zm00001d002418/Zm00001d007889/Zm00001d008357/Zm00001d008863/Zm00001d009055/Zm00001d010578/Zm00001d011696/Zm00001d012761/Zm00001d013405/Zm00001d017754/Zm00001d025853/Zm00001d026246/Zm00001d031231/Zm00001d033982/Zm00001d034125/Zm00001d034137/Zm00001d037010/Zm00001d037744/Zm00001d039162/Zm00001d039296/Zm00001d039409/Zm00001d048564/Zm00001d053548	-/-/-/-/-/-/-/-/-/-/-/-/-/-/CK2 protein kinase alpha 2/-/-/-/-/-/-/-/-	23
BP	GO:0018210	peptidyl-threonine modification	23/3483	68/22306	0.000160255	0.0082684	Zm00001d002418/Zm00001d007889/Zm00001d008357/Zm00001d008863/Zm00001d009055/Zm00001d010578/Zm00001d011696/Zm00001d012761/Zm00001d013405/Zm00001d017754/Zm00001d025853/Zm00001d026246/Zm00001d031231/Zm00001d033982/Zm00001d034125/Zm00001d034137/Zm00001d037010/Zm00001d037744/Zm00001d039162/Zm00001d039296/Zm00001d039409/Zm00001d048564/Zm00001d053548	-/-/-/-/-/-/-/-/-/-/-/-/-/-/CK2 protein kinase alpha 2/-/-/-/-/-/-/-/-	23
BP	GO:0034968	histone lysine methylation	25/3483	77/22306	0.000177845	0.00896256	Zm00001d002938/Zm00001d004739/Zm00001d005445/Zm00001d005563/Zm00001d006323/Zm00001d006369/Zm00001d010646/Zm00001d011490/Zm00001d012751/Zm00001d015265/Zm00001d016804/Zm00001d017798/Zm00001d019195/Zm00001d019907/Zm00001d020038/Zm00001d023333/Zm00001d023914/Zm00001d036296/Zm00001d038541/Zm00001d038812/Zm00001d042794/Zm00001d044273/Zm00001d047636/Zm00001d048691/Zm00001d052353	set domain gene107/-/-/sdg110b/-/set domain gene116/set domain gene105/arabidopsis trithorax homolog5/Homeobox-transcription factor 9/Homeobox-transcription factor 28/-/-/-/set domain gene128/set domain gene110a/set domain gene127/PHD-transcription factor 4/enhancer of zeste1/set domain gene111/Homeobox-transcription factor 92/-/-/enhancer of zeste2/-/-	25
BP	GO:0043414	macromolecule methylation	61/3483	250/22306	0.00018955	0.00913049	Zm00001d002938/Zm00001d003275/Zm00001d004739/Zm00001d005445/Zm00001d005563/Zm00001d005972/Zm00001d006323/Zm00001d006369/Zm00001d009597/Zm00001d009723/Zm00001d010646/Zm00001d011490/Zm00001d012751/Zm00001d012794/Zm00001d013533/Zm00001d015086/Zm00001d015194/Zm00001d015228/Zm00001d015265/Zm00001d016804/Zm00001d017469/Zm00001d017798/Zm00001d017887/Zm00001d017897/Zm00001d018070/Zm00001d018863/Zm00001d0…	set domain gene107/-/-/-/sdg110b/-/-/set domain gene116/-/plastid transcriptionally active14/set domain gene105/arabidopsis trithorax homolog5/Homeobox-transcription factor 9/-/-/-/-/-/Homeobox-transcription factor 28/-/-/-/-/-/-/hua enhancer1/DNA methyl transferase1/-/set domain gene128/set domain gene110a/-/-/-/set domain gene127/PHD-transcription factor 4/-/-/-/-/-/-/-/-/-/-/enhancer of zeste1…	61
BP	GO:0007034	vacuolar transport	31/3483	104/22306	0.000189604	0.00913049	Zm00001d004396/Zm00001d005062/Zm00001d006939/Zm00001d008613/Zm00001d010470/Zm00001d011353/Zm00001d012618/Zm00001d013314/Zm00001d014303/Zm00001d018057/Zm00001d018382/Zm00001d021521/Zm00001d025044/Zm00001d025134/Zm00001d030935/Zm00001d031942/Zm00001d032710/Zm00001d033488/Zm00001d035088/Zm00001d035089/Zm00001d035093/Zm00001d038106/Zm00001d041948/Zm00001d043112/Zm00001d043269/Zm00001d047074/Zm00001d0…	-/-/-/-/-/-/-/vesicular transport protein1/-/-/vacuolar protein sorting2/-/-/-/-/-/-/-/-/-/-/-/-/-/-/-/-/-/-/-/-	31
BP	GO:0072665	protein localization to vacuole	20/3483	58/22306	0.000314083	0.0145577	Zm00001d005062/Zm00001d006939/Zm00001d008613/Zm00001d012618/Zm00001d014303/Zm00001d018057/Zm00001d018382/Zm00001d030935/Zm00001d031942/Zm00001d033488/Zm00001d035088/Zm00001d035089/Zm00001d041948/Zm00001d043112/Zm00001d043269/Zm00001d047074/Zm00001d048239/Zm00001d052028/Zm00001d053262/Zm00001d053371	-/-/-/-/-/-/vacuolar protein sorting2/-/-/-/-/-/-/-/-/-/-/-/-/-	20
BP	GO:0000070	mitotic sister chromatid segregation	28/3483	93/22306	0.000315742	0.0145577	Zm00001d002056/Zm00001d003151/Zm00001d006499/Zm00001d007233/Zm00001d007585/Zm00001d007943/Zm00001d009780/Zm00001d018657/Zm00001d019343/Zm00001d019789/Zm00001d021635/Zm00001d023279/Zm00001d023839/Zm00001d025789/Zm00001d031847/Zm00001d034239/Zm00001d037377/Zm00001d037979/Zm00001d037981/Zm00001d042639/Zm00001d042706/Zm00001d042708/Zm00001d044220/Zm00001d044581/Zm00001d044630/Zm00001d045354/Zm00001d0…	-/-/-/-/-/-/gamma-tubulin1/-/GNAT-transcription factor 32/-/-/-/-/-/-/-/-/-/-/-/-/-/centromere protein C 1/-/-/-/-/-	28
BP	GO:0034504	protein localization to nucleus	23/3483	71/22306	0.000329592	0.0148797	Zm00001d007065/Zm00001d008345/Zm00001d009850/Zm00001d014033/Zm00001d019335/Zm00001d021893/Zm00001d022536/Zm00001d026263/Zm00001d028262/Zm00001d028596/Zm00001d030340/Zm00001d030694/Zm00001d033632/Zm00001d033764/Zm00001d037606/Zm00001d038021/Zm00001d038204/Zm00001d041556/Zm00001d044054/Zm00001d045725/Zm00001d048047/Zm00001d048741/Zm00001d050526	-/-/importin1/-/-/-/-/-/-/-/-/-/-/-/-/-/-/-/-/-/-/-/-	23
BP	GO:0008380	RNA splicing	79/3483	350/22306	0.000360585	0.0159467	Zm00001d001951/Zm00001d003014/Zm00001d003984/Zm00001d004936/Zm00001d004993/Zm00001d005406/Zm00001d006294/Zm00001d006459/Zm00001d006906/Zm00001d007043/Zm00001d007572/Zm00001d007632/Zm00001d007770/Zm00001d007784/Zm00001d007898/Zm00001d008559/Zm00001d009452/Zm00001d009618/Zm00001d010901/Zm00001d011150/Zm00001d011652/Zm00001d013548/Zm00001d014327/Zm00001d014512/Zm00001d014812/Zm00001d015065/Zm00001d0…	-/-/-/-/-/-/-/-/-/-/CRM family member3/-/-/C3H-transcription factor 34/-/chloroplast RNA splicing2/-/what's this factor1/-/-/-/-/-/-/-/-/-/-/-/-/-/organelle transcript processing51/-/-/crs2 associated factor1/-/-/-/-/-/-/-/-/-/-/-/-/-/-/-/-/-/-/crs2 associated factor2/-/-/-/-/-/-/-/-/-/-/-/-/-/-/-/-/-/-/-/-/-/C3H-transcription factor 343/-/-/-	79
BP	GO:0061024	membrane organization	73/3483	320/22306	0.0004268	0.0184975	Zm00001d002012/Zm00001d002148/Zm00001d002444/Zm00001d003846/Zm00001d004051/Zm00001d004639/Zm00001d004640/Zm00001d005170/Zm00001d005902/Zm00001d006384/Zm00001d006588/Zm00001d006916/Zm00001d006939/Zm00001d007075/Zm00001d009452/Zm00001d009723/Zm00001d010522/Zm00001d011213/Zm00001d012017/Zm00001d012861/Zm00001d012930/Zm00001d013195/Zm00001d013301/Zm00001d014188/Zm00001d014808/Zm00001d015450/Zm00001d0…	-/-/-/-/-/-/-/-/-/-/-/-/-/-/-/plastid transcriptionally active14/-/-/-/-/-/-/-/-/-/SUN domain protein1/-/-/-/-/-/-/-/-/-/-/-/-/-/-/-/-/-/-/-/-/-/-/-/-/-/-/-/-/-/-/-/-/-/-/-/-/-/-/-/-/-/-/-/-/-/-/-	73
BP	GO:0006606	protein import into nucleus	22/3483	68/22306	0.000449153	0.0190846	Zm00001d007065/Zm00001d008345/Zm00001d009850/Zm00001d014033/Zm00001d019335/Zm00001d021893/Zm00001d022536/Zm00001d026263/Zm00001d028262/Zm00001d030340/Zm00001d030694/Zm00001d033632/Zm00001d033764/Zm00001d037606/Zm00001d038021/Zm00001d038204/Zm00001d041556/Zm00001d044054/Zm00001d045725/Zm00001d048047/Zm00001d048741/Zm00001d050526	-/-/importin1/-/-/-/-/-/-/-/-/-/-/-/-/-/-/-/-/-/-/-	22
BP	GO:0000375	RNA splicing, via transesterification reactions	72/3483	317/22306	0.000530675	0.0216976	Zm00001d001951/Zm00001d003014/Zm00001d003984/Zm00001d004936/Zm00001d004993/Zm00001d005406/Zm00001d006294/Zm00001d006459/Zm00001d006906/Zm00001d007043/Zm00001d007572/Zm00001d007770/Zm00001d007784/Zm00001d007898/Zm00001d009452/Zm00001d010901/Zm00001d011150/Zm00001d011652/Zm00001d013548/Zm00001d014327/Zm00001d014512/Zm00001d014812/Zm00001d015065/Zm00001d015194/Zm00001d015208/Zm00001d015248/Zm00001d0…	-/-/-/-/-/-/-/-/-/-/CRM family member3/-/C3H-transcription factor 34/-/-/-/-/-/-/-/-/-/-/-/-/-/-/-/organelle transcript processing51/-/-/crs2 associated factor1/-/-/-/-/-/-/-/-/-/-/-/-/-/-/-/-/-/crs2 associated factor2/-/-/-/-/-/-/-/-/-/-/-/-/-/-/-/-/-/-/-/-/-/-	72
BP	GO:0000377	RNA splicing, via transesterification reactions with bulged adenosine as nucleophile	72/3483	317/22306	0.000530675	0.0216976	Zm00001d001951/Zm00001d003014/Zm00001d003984/Zm00001d004936/Zm00001d004993/Zm00001d005406/Zm00001d006294/Zm00001d006459/Zm00001d006906/Zm00001d007043/Zm00001d007572/Zm00001d007770/Zm00001d007784/Zm00001d007898/Zm00001d009452/Zm00001d010901/Zm00001d011150/Zm00001d011652/Zm00001d013548/Zm00001d014327/Zm00001d014512/Zm00001d014812/Zm00001d015065/Zm00001d015194/Zm00001d015208/Zm00001d015248/Zm00001d0…	-/-/-/-/-/-/-/-/-/-/CRM family member3/-/C3H-transcription factor 34/-/-/-/-/-/-/-/-/-/-/-/-/-/-/-/organelle transcript processing51/-/-/crs2 associated factor1/-/-/-/-/-/-/-/-/-/-/-/-/-/-/-/-/-/crs2 associated factor2/-/-/-/-/-/-/-/-/-/-/-/-/-/-/-/-/-/-/-/-/-/-	72
BP	GO:0051170	import into nucleus	22/3483	69/22306	0.000563335	0.0226064	Zm00001d007065/Zm00001d008345/Zm00001d009850/Zm00001d014033/Zm00001d019335/Zm00001d021893/Zm00001d022536/Zm00001d026263/Zm00001d028262/Zm00001d030340/Zm00001d030694/Zm00001d033632/Zm00001d033764/Zm00001d037606/Zm00001d038021/Zm00001d038204/Zm00001d041556/Zm00001d044054/Zm00001d045725/Zm00001d048047/Zm00001d048741/Zm00001d050526	-/-/importin1/-/-/-/-/-/-/-/-/-/-/-/-/-/-/-/-/-/-/-	22
BP	GO:0006470	protein dephosphorylation	86/3483	393/22306	0.000583821	0.0230025	Zm00001d000391/Zm00001d001988/Zm00001d002272/Zm00001d002369/Zm00001d004669/Zm00001d004992/Zm00001d005240/Zm00001d005270/Zm00001d005609/Zm00001d006614/Zm00001d008171/Zm00001d009719/Zm00001d009844/Zm00001d010927/Zm00001d011195/Zm00001d011202/Zm00001d011233/Zm00001d011282/Zm00001d011424/Zm00001d012295/Zm00001d012667/Zm00001d013027/Zm00001d013047/Zm00001d013253/Zm00001d013680/Zm00001d014037/Zm00001d0…	-/-/-/-/-/-/FHA-transcription factor 7/-/protein phosphatase homolog7/-/-/-/-/-/-/-/-/-/-/-/-/-/-/-/-/-/-/-/-/-/-/-/kinase associated protein phosphatase1/-/-/-/-/-/-/-/-/-/-/-/-/-/-/-/-/-/-/-/-/-/-/-/-/-/-/-/-/protein phosphatase homolog12/-/-/-/-/-/-/-/-/-/-/-/-/-/-/-/-/-/-/DBP-transcription factor 1/-/-/-/-/-	86
BP	GO:0031047	gene silencing by RNA	27/3483	92/22306	0.000625073	0.0239161	Zm00001d002650/Zm00001d007786/Zm00001d011096/Zm00001d012824/Zm00001d014977/Zm00001d017962/Zm00001d018863/Zm00001d020011/Zm00001d022586/Zm00001d024018/Zm00001d025830/Zm00001d026300/Zm00001d027412/Zm00001d029133/Zm00001d031908/Zm00001d033149/Zm00001d035256/Zm00001d037971/Zm00001d038093/Zm00001d040429/Zm00001d043861/Zm00001d044127/Zm00001d044552/Zm00001d044917/Zm00001d048428/Zm00001d048432/Zm00001d0…	argonaute1c/argonaute5b/argonaute1/-/brahma1/-/hua enhancer1/-/-/-/dicer-like4/argonaute2b/dicer-like 101/-/-/-/ragged seedling1/FHA-transcription factor 15/-/-/-/putative transcription factor/-/-/-/-/-	27
BP	GO:0097435	supramolecular fiber organization	43/3483	169/22306	0.000629081	0.0239161	Zm00001d006372/Zm00001d006533/Zm00001d007806/Zm00001d009780/Zm00001d011563/Zm00001d011854/Zm00001d012525/Zm00001d012559/Zm00001d012966/Zm00001d013141/Zm00001d013389/Zm00001d017106/Zm00001d018004/Zm00001d018481/Zm00001d018484/Zm00001d018535/Zm00001d019495/Zm00001d022114/Zm00001d023262/Zm00001d023735/Zm00001d025793/Zm00001d026621/Zm00001d028550/Zm00001d029343/Zm00001d032598/Zm00001d033414/Zm00001d0…	actin depolymerizing factor2/-/-/gamma-tubulin1/-/-/-/-/-/-/-/-/Rho-related protein from plants 1/myosin2/-/brick1/-/-/brick3/-/-/-/LIM-transcription factor 1/-/-/-/-/-/reaction to X. oryzae1/LIM-transcription factor 12/-/-/-/-/-/-/-/-/Rho-related protein from plants 5/double B-box zinc finger protein11/-/-/Rho-related protein from plants 8	43
BP	GO:0007064	mitotic sister chromatid cohesion	11/3483	25/22306	0.000697782	0.0260706	Zm00001d007233/Zm00001d007943/Zm00001d018657/Zm00001d019343/Zm00001d025789/Zm00001d031847/Zm00001d037377/Zm00001d042706/Zm00001d042708/Zm00001d045783/Zm00001d052197	-/-/-/GNAT-transcription factor 32/-/-/-/-/-/-/-	11
BP	GO:0006612	protein targeting to membrane	27/3483	93/22306	0.000751617	0.027606	Zm00001d000349/Zm00001d001882/Zm00001d002534/Zm00001d003502/Zm00001d003913/Zm00001d004119/Zm00001d006102/Zm00001d006588/Zm00001d022038/Zm00001d022502/Zm00001d026600/Zm00001d027293/Zm00001d028619/Zm00001d033317/Zm00001d034805/Zm00001d037422/Zm00001d038321/Zm00001d042044/Zm00001d043303/Zm00001d044647/Zm00001d047439/Zm00001d047805/Zm00001d048100/Zm00001d048239/Zm00001d049857/Zm00001d051421/Zm00001d0…	-/-/-/-/high chlorophyll fluorescence106/-/-/-/-/-/-/signal recognition particle receptor homolog1/-/thylakoid assembly4/-/-/-/-/-/-/-/-/-/-/-/-/-	27
BP	GO:0000902	cell morphogenesis	23/3483	75/22306	0.000787376	0.0284374	Zm00001d004639/Zm00001d004640/Zm00001d005902/Zm00001d008654/Zm00001d012212/Zm00001d013301/Zm00001d013389/Zm00001d018004/Zm00001d019881/Zm00001d021641/Zm00001d023262/Zm00001d023908/Zm00001d027633/Zm00001d029343/Zm00001d032099/Zm00001d033597/Zm00001d035030/Zm00001d044802/Zm00001d046973/Zm00001d049155/Zm00001d051839/Zm00001d052273/Zm00001d053674	-/-/-/-/gibberellin 20-oxidase5/-/-/Rho-related protein from plants 1/-/-/brick3/-/-/-/-/-/-/Rho-related protein from plants 5/-/-/-/Rho-related protein from plants 8/-	23
BP	GO:0032989	cellular component morphogenesis	26/3483	89/22306	0.000842204	0.029919	Zm00001d004639/Zm00001d004640/Zm00001d005902/Zm00001d008654/Zm00001d012212/Zm00001d013301/Zm00001d013389/Zm00001d016452/Zm00001d018004/Zm00001d019881/Zm00001d020970/Zm00001d021641/Zm00001d023262/Zm00001d023908/Zm00001d027633/Zm00001d029343/Zm00001d032099/Zm00001d033597/Zm00001d035030/Zm00001d044802/Zm00001d046973/Zm00001d048337/Zm00001d049155/Zm00001d051839/Zm00001d052273/Zm00001d053674	-/-/-/-/gibberellin 20-oxidase5/-/-/-/Rho-related protein from plants 1/-/dihydroflavonoid reductase1/-/brick3/-/-/-/-/-/-/Rho-related protein from plants 5/-/-/-/-/Rho-related protein from plants 8/-	26
BP	GO:0018108	peptidyl-tyrosine phosphorylation	19/3483	58/22306	0.000905314	0.0311399	Zm00001d002174/Zm00001d002418/Zm00001d005450/Zm00001d011700/Zm00001d012636/Zm00001d017754/Zm00001d019515/Zm00001d021136/Zm00001d026246/Zm00001d026383/Zm00001d031691/Zm00001d036300/Zm00001d037829/Zm00001d039176/Zm00001d040691/Zm00001d042551/Zm00001d046889/Zm00001d048345/Zm00001d053575	-/-/-/-/-/-/-/-/-/-/-/-/-/-/-/-/-/-/-	19
BP	GO:0018212	peptidyl-tyrosine modification	19/3483	58/22306	0.000905314	0.0311399	Zm00001d002174/Zm00001d002418/Zm00001d005450/Zm00001d011700/Zm00001d012636/Zm00001d017754/Zm00001d019515/Zm00001d021136/Zm00001d026246/Zm00001d026383/Zm00001d031691/Zm00001d036300/Zm00001d037829/Zm00001d039176/Zm00001d040691/Zm00001d042551/Zm00001d046889/Zm00001d048345/Zm00001d053575	-/-/-/-/-/-/-/-/-/-/-/-/-/-/-/-/-/-/-	19
BP	GO:0016458	gene silencing	40/3483	157/22306	0.000926581	0.0312652	Zm00001d002650/Zm00001d007786/Zm00001d011096/Zm00001d012824/Zm00001d013440/Zm00001d014977/Zm00001d016518/Zm00001d017962/Zm00001d017982/Zm00001d018218/Zm00001d018863/Zm00001d019789/Zm00001d020011/Zm00001d020182/Zm00001d021145/Zm00001d022586/Zm00001d024018/Zm00001d025830/Zm00001d026300/Zm00001d027412/Zm00001d029133/Zm00001d031908/Zm00001d033149/Zm00001d034434/Zm00001d035256/Zm00001d036296/Zm00001d0…	argonaute1c/argonaute5b/argonaute1/-/-/brahma1/-/-/-/GNAT-transcription factor 26/hua enhancer1/-/-/histone acetyltransferase1/-/-/-/dicer-like4/argonaute2b/dicer-like 101/-/-/-/-/ragged seedling1/enhancer of zeste1/FHA-transcription factor 15/-/-/-/putative transcription factor/-/-/-/-/-/-/-/-/-	40
BP	GO:0009894	regulation of catabolic process	25/3483	85/22306	0.000942536	0.0312652	Zm00001d002373/Zm00001d003207/Zm00001d005502/Zm00001d006011/Zm00001d014297/Zm00001d015259/Zm00001d015886/Zm00001d019920/Zm00001d024342/Zm00001d025673/Zm00001d025750/Zm00001d026265/Zm00001d026676/Zm00001d028285/Zm00001d030398/Zm00001d031178/Zm00001d032875/Zm00001d035574/Zm00001d037950/Zm00001d039860/Zm00001d047833/Zm00001d049357/Zm00001d050090/Zm00001d050616/Zm00001d052888	-/-/-/-/histidine kinase3/-/-/-/-/-/-/-/-/-/-/-/-/-/-/-/autophagy1c/-/-/-/-	25
BP	GO:0018022	peptidyl-lysine methylation	28/3483	99/22306	0.000952239	0.0312652	Zm00001d002938/Zm00001d004739/Zm00001d005445/Zm00001d005563/Zm00001d006323/Zm00001d006369/Zm00001d009723/Zm00001d010646/Zm00001d011490/Zm00001d012751/Zm00001d015265/Zm00001d016804/Zm00001d017798/Zm00001d019195/Zm00001d019907/Zm00001d020038/Zm00001d023333/Zm00001d023914/Zm00001d024420/Zm00001d036004/Zm00001d036296/Zm00001d038541/Zm00001d038812/Zm00001d042794/Zm00001d044273/Zm00001d047636/Zm00001d0…	set domain gene107/-/-/sdg110b/-/set domain gene116/plastid transcriptionally active14/set domain gene105/arabidopsis trithorax homolog5/Homeobox-transcription factor 9/Homeobox-transcription factor 28/-/-/-/set domain gene128/set domain gene110a/set domain gene127/PHD-transcription factor 4/-/-/enhancer of zeste1/set domain gene111/Homeobox-transcription factor 92/-/-/enhancer of zeste2/-/-	28
BP	GO:0016571	histone methylation	29/3483	104/22306	0.000999054	0.0321983	Zm00001d002938/Zm00001d004739/Zm00001d005445/Zm00001d005563/Zm00001d006323/Zm00001d006369/Zm00001d010646/Zm00001d011490/Zm00001d012751/Zm00001d015228/Zm00001d015265/Zm00001d016804/Zm00001d017798/Zm00001d019195/Zm00001d019907/Zm00001d020038/Zm00001d022469/Zm00001d023333/Zm00001d023914/Zm00001d032633/Zm00001d036296/Zm00001d038541/Zm00001d038812/Zm00001d042794/Zm00001d044273/Zm00001d047636/Zm00001d0…	set domain gene107/-/-/sdg110b/-/set domain gene116/set domain gene105/arabidopsis trithorax homolog5/Homeobox-transcription factor 9/-/Homeobox-transcription factor 28/-/-/-/set domain gene128/set domain gene110a/-/set domain gene127/PHD-transcription factor 4/-/enhancer of zeste1/set domain gene111/Homeobox-transcription factor 92/-/-/enhancer of zeste2/-/-/-	29
BP	GO:0010608	posttranscriptional regulation of gene expression	54/3483	229/22306	0.00101038	0.0321983	Zm00001d000213/Zm00001d003198/Zm00001d003611/Zm00001d004568/Zm00001d004573/Zm00001d004979/Zm00001d005502/Zm00001d007940/Zm00001d012824/Zm00001d013653/Zm00001d013673/Zm00001d014246/Zm00001d014977/Zm00001d017882/Zm00001d017962/Zm00001d017982/Zm00001d018863/Zm00001d019920/Zm00001d020011/Zm00001d021668/Zm00001d021716/Zm00001d021815/Zm00001d022042/Zm00001d022586/Zm00001d024018/Zm00001d025673/Zm00001d0…	-/-/-/-/-/-/-/-/-/-/-/-/brahma1/-/-/-/hua enhancer1/-/-/translation initiation factor1/chloroplast RNA processing1/elongation initiation factor2/eukaryotic translation initiation factor 5A/-/-/-/dicer-like4/-/dicer-like 101/-/high chlorophyll fluorescence3/-/-/-/-/-/-/-/-/-/-/FHA-transcription factor 15/eucaryotic initiation factor6/-/-/-/-/-/-/-/-/-/-/-	54
BP	GO:0006623	protein targeting to vacuole	17/3483	50/22306	0.00103793	0.0325969	Zm00001d005062/Zm00001d006939/Zm00001d008613/Zm00001d014303/Zm00001d018057/Zm00001d018382/Zm00001d030935/Zm00001d031942/Zm00001d033488/Zm00001d035088/Zm00001d035089/Zm00001d041948/Zm00001d047074/Zm00001d048239/Zm00001d052028/Zm00001d053262/Zm00001d053371	-/-/-/-/-/vacuolar protein sorting2/-/-/-/-/-/-/-/-/-/-/-	17
BP	GO:0098813	nuclear chromosome segregation	39/3483	153/22306	0.00105459	0.0326471	Zm00001d002056/Zm00001d002154/Zm00001d003151/Zm00001d003274/Zm00001d006499/Zm00001d007233/Zm00001d007585/Zm00001d007679/Zm00001d007943/Zm00001d009780/Zm00001d014913/Zm00001d018657/Zm00001d019343/Zm00001d019789/Zm00001d021635/Zm00001d023279/Zm00001d023839/Zm00001d024094/Zm00001d024953/Zm00001d025789/Zm00001d028538/Zm00001d031847/Zm00001d032575/Zm00001d034239/Zm00001d037377/Zm00001d037979/Zm00001d0…	-/meiotic recombination protein 11 homolog A/-/-/-/-/-/-/-/gamma-tubulin1/-/-/GNAT-transcription factor 32/-/-/-/-/-/-/-/-/-/-/-/-/-/-/-/-/-/-/-/centromere protein C 1/-/-/-/-/-/-	39
BP	GO:0008360	regulation of cell shape	9/3483	19/22306	0.00112948	0.034473	Zm00001d004639/Zm00001d004640/Zm00001d005902/Zm00001d008654/Zm00001d013301/Zm00001d018004/Zm00001d044802/Zm00001d049155/Zm00001d052273	-/-/-/-/-/Rho-related protein from plants 1/Rho-related protein from plants 5/-/Rho-related protein from plants 8	9
BP	GO:0007051	spindle organization	24/3483	82/22306	0.00127201	0.0382841	Zm00001d002186/Zm00001d005269/Zm00001d007953/Zm00001d009780/Zm00001d012525/Zm00001d014124/Zm00001d015020/Zm00001d015692/Zm00001d018009/Zm00001d018624/Zm00001d019670/Zm00001d022114/Zm00001d024292/Zm00001d025793/Zm00001d027707/Zm00001d028073/Zm00001d034166/Zm00001d034680/Zm00001d037084/Zm00001d038383/Zm00001d039474/Zm00001d043093/Zm00001d048104/Zm00001d048137	divergent spindle1/-/-/gamma-tubulin1/-/-/-/-/-/kinesin-related protein11/-/-/-/-/-/-/-/-/-/-/-/-/-/-	24
BP	GO:0023014	signal transduction by protein phosphorylation	29/3483	106/22306	0.00138325	0.040882	Zm00001d001978/Zm00001d010302/Zm00001d011426/Zm00001d012005/Zm00001d013262/Zm00001d013412/Zm00001d014297/Zm00001d015269/Zm00001d017525/Zm00001d017977/Zm00001d021584/Zm00001d021954/Zm00001d022350/Zm00001d024807/Zm00001d025449/Zm00001d028514/Zm00001d028905/Zm00001d033642/Zm00001d034055/Zm00001d037604/Zm00001d039037/Zm00001d039141/Zm00001d042312/Zm00001d045359/Zm00001d045967/Zm00001d047349/Zm00001d0…	-/-/-/-/topoisomerase-like enzyme1/-/histidine kinase3/MAP kinase14/-/histidine kinase1/-/-/-/MAP kinase6/-/MAP kinase kinase kinase11/phytochromeB1/ethylene receptor1-25/-/-/-/-/histidine kinase2/-/-/salt-induced MAP kinase1/-/-/GRMZM2G374088	29
BP	GO:0007017	microtubule-based process	70/3483	317/22306	0.00139606	0.040882	Zm00001d001928/Zm00001d002186/Zm00001d003644/Zm00001d005269/Zm00001d007953/Zm00001d008216/Zm00001d008330/Zm00001d009233/Zm00001d009738/Zm00001d009780/Zm00001d011405/Zm00001d011563/Zm00001d012525/Zm00001d013859/Zm00001d013891/Zm00001d014124/Zm00001d015020/Zm00001d015096/Zm00001d015692/Zm00001d016273/Zm00001d018009/Zm00001d018246/Zm00001d018441/Zm00001d018624/Zm00001d019670/Zm00001d020685/Zm00001d0…	-/divergent spindle1/-/-/-/-/-/-/-/gamma-tubulin1/-/-/-/-/-/-/-/-/-/-/-/-/-/kinesin-related protein11/-/-/-/-/-/-/-/discordia1/-/-/kinesin-related protein15/-/-/-/-/-/-/-/-/-/-/-/-/-/-/-/-/-/kinesin-related protein9/-/-/-/-/-/-/-/-/-/-/-/-/-/-/-/-/-	70
BP	GO:0006406	mRNA export from nucleus	15/3483	43/22306	0.00150046	0.0427829	Zm00001d008259/Zm00001d012030/Zm00001d014280/Zm00001d020011/Zm00001d022000/Zm00001d022343/Zm00001d026263/Zm00001d028695/Zm00001d029133/Zm00001d030774/Zm00001d040389/Zm00001d043861/Zm00001d048741/Zm00001d051838/Zm00001d052453	-/-/-/-/-/-/-/-/-/-/-/-/-/-/-	15
BP	GO:0071427	mRNA-containing ribonucleoprotein complex export from nucleus	15/3483	43/22306	0.00150046	0.0427829	Zm00001d008259/Zm00001d012030/Zm00001d014280/Zm00001d020011/Zm00001d022000/Zm00001d022343/Zm00001d026263/Zm00001d028695/Zm00001d029133/Zm00001d030774/Zm00001d040389/Zm00001d043861/Zm00001d048741/Zm00001d051838/Zm00001d052453	-/-/-/-/-/-/-/-/-/-/-/-/-/-/-	15
BP	GO:0033674	positive regulation of kinase activity	24/3483	83/22306	0.00152868	0.0430213	Zm00001d001978/Zm00001d005064/Zm00001d017392/Zm00001d017525/Zm00001d019681/Zm00001d020158/Zm00001d021584/Zm00001d023230/Zm00001d025449/Zm00001d026030/Zm00001d027790/Zm00001d028514/Zm00001d034055/Zm00001d035087/Zm00001d045359/Zm00001d045967/Zm00001d047728/Zm00001d048104/Zm00001d051291/Zm00001d051307/Zm00001d052147/Zm00001d052327/Zm00001d053891/Zm00001d053894	-/-/-/-/-/-/-/-/-/-/-/MAP kinase kinase kinase11/-/acidic ribosomal protein P1a/-/-/-/-/-/autophagy13a/-/-/-/-	24
BP	GO:0000226	microtubule cytoskeleton organization	45/3483	187/22306	0.00165187	0.0456042	Zm00001d002186/Zm00001d005269/Zm00001d007953/Zm00001d008216/Zm00001d009780/Zm00001d011563/Zm00001d012525/Zm00001d013891/Zm00001d014124/Zm00001d015020/Zm00001d015096/Zm00001d015692/Zm00001d018009/Zm00001d018624/Zm00001d019670/Zm00001d020685/Zm00001d021504/Zm00001d022114/Zm00001d023735/Zm00001d024292/Zm00001d024857/Zm00001d025793/Zm00001d026621/Zm00001d027707/Zm00001d028073/Zm00001d032598/Zm00001d0…	divergent spindle1/-/-/-/gamma-tubulin1/-/-/-/-/-/-/-/-/kinesin-related protein11/-/-/-/-/-/-/discordia1/-/-/-/-/-/-/-/-/-/-/-/-/-/-/-/-/-/-/-/-/-/-/-/-	45
BP	GO:0043087	regulation of GTPase activity	30/3483	112/22306	0.00166254	0.0456042	Zm00001d003904/Zm00001d004639/Zm00001d004640/Zm00001d005902/Zm00001d006192/Zm00001d006602/Zm00001d007081/Zm00001d011855/Zm00001d012126/Zm00001d013301/Zm00001d013840/Zm00001d013891/Zm00001d019287/Zm00001d021240/Zm00001d022387/Zm00001d022584/Zm00001d028464/Zm00001d028755/Zm00001d031534/Zm00001d034941/Zm00001d040408/Zm00001d047717/Zm00001d047727/Zm00001d047762/Zm00001d047793/Zm00001d048857/Zm00001d0…	-/-/-/-/-/-/-/-/-/-/-/-/-/-/-/-/-/-/-/-/-/-/-/-/-/-/-/-/-/-	30
BP	GO:0006013	mannose metabolic process	6/3483	10/22306	0.00171362	0.0457264	Zm00001d007383/Zm00001d030282/Zm00001d032090/Zm00001d035570/Zm00001d037272/Zm00001d044759	-/-/-/-/-/-	6
BP	GO:0000398	mRNA splicing, via spliceosome	66/3483	298/22306	0.00173498	0.0457264	Zm00001d001951/Zm00001d003014/Zm00001d003984/Zm00001d004936/Zm00001d004993/Zm00001d005406/Zm00001d006294/Zm00001d006459/Zm00001d006906/Zm00001d007043/Zm00001d007770/Zm00001d007784/Zm00001d007898/Zm00001d009452/Zm00001d010901/Zm00001d011150/Zm00001d011652/Zm00001d013548/Zm00001d014327/Zm00001d014512/Zm00001d014812/Zm00001d015065/Zm00001d015194/Zm00001d015208/Zm00001d015248/Zm00001d015893/Zm00001d0…	-/-/-/-/-/-/-/-/-/-/-/C3H-transcription factor 34/-/-/-/-/-/-/-/-/-/-/-/-/-/-/-/organelle transcript processing51/-/-/-/-/-/-/-/-/-/-/-/-/-/-/-/-/-/-/-/-/-/-/-/-/-/-/-/-/-/-/-/-/-/-/-/-/-/-	66
BP	GO:0006536	glutamate metabolic process	9/3483	20/22306	0.00177081	0.0457264	Zm00001d002358/Zm00001d022388/Zm00001d031749/Zm00001d033228/Zm00001d038841/Zm00001d038948/Zm00001d043845/Zm00001d044503/Zm00001d047124	necrotic4/ferredoxin-dependent glutamate synthase1/-/-/putative aldehyde dehydrogenase MIS1/-/-/-/-	9
BP	GO:0034629	cellular protein-containing complex localization	9/3483	20/22306	0.00177081	0.0457264	Zm00001d007760/Zm00001d013049/Zm00001d018060/Zm00001d019104/Zm00001d019287/Zm00001d021828/Zm00001d023839/Zm00001d033303/Zm00001d034680	-/-/-/-/-/-/-/roothair defective1/-	9
BP	GO:0051345	positive regulation of hydrolase activity	38/3483	152/22306	0.00177251	0.0457264	Zm00001d004639/Zm00001d004640/Zm00001d005902/Zm00001d006192/Zm00001d006602/Zm00001d007081/Zm00001d008330/Zm00001d011855/Zm00001d011877/Zm00001d012126/Zm00001d013301/Zm00001d013840/Zm00001d013891/Zm00001d015227/Zm00001d015228/Zm00001d019287/Zm00001d021240/Zm00001d022387/Zm00001d022584/Zm00001d028464/Zm00001d028755/Zm00001d031534/Zm00001d034941/Zm00001d036531/Zm00001d037110/Zm00001d037401/Zm00001d0…	-/-/-/-/-/-/-/-/-/-/-/-/-/-/-/-/-/-/-/-/-/-/-/-/-/-/-/-/-/-/-/-/-/-/-/-/-/-	38
BP	GO:0048194	Golgi vesicle budding	16/3483	48/22306	0.0018285	0.0466159	Zm00001d004639/Zm00001d004640/Zm00001d005902/Zm00001d007075/Zm00001d013301/Zm00001d014188/Zm00001d019287/Zm00001d022378/Zm00001d032334/Zm00001d032980/Zm00001d035889/Zm00001d045956/Zm00001d046194/Zm00001d048857/Zm00001d049155/Zm00001d054076	-/-/-/-/-/-/-/-/-/-/-/-/-/-/-/-	16
BP	GO:0070972	protein localization to endoplasmic reticulum	22/3483	75/22306	0.00192548	0.0485176	Zm00001d000349/Zm00001d001882/Zm00001d003502/Zm00001d004119/Zm00001d004655/Zm00001d012853/Zm00001d013421/Zm00001d013642/Zm00001d021306/Zm00001d021401/Zm00001d027293/Zm00001d034805/Zm00001d035889/Zm00001d036443/Zm00001d037422/Zm00001d038754/Zm00001d040178/Zm00001d042044/Zm00001d043303/Zm00001d048100/Zm00001d052556/Zm00001d054076	-/-/-/-/-/-/-/-/-/-/signal recognition particle receptor homolog1/-/-/-/-/-/-/-/-/-/-/-	22
BP	GO:0044087	regulation of cellular component biogenesis	31/3483	118/22306	0.00196484	0.0489403	Zm00001d002243/Zm00001d004639/Zm00001d004640/Zm00001d005902/Zm00001d007806/Zm00001d011680/Zm00001d013301/Zm00001d015886/Zm00001d016439/Zm00001d017106/Zm00001d017574/Zm00001d018004/Zm00001d018484/Zm00001d022148/Zm00001d023760/Zm00001d024205/Zm00001d026153/Zm00001d028585/Zm00001d029343/Zm00001d033414/Zm00001d034082/Zm00001d035183/Zm00001d044358/Zm00001d044802/Zm00001d045323/Zm00001d046539/Zm00001d0…	-/-/-/-/-/p15 (PC4 Sub1)-transcription factor 3/-/-/-/-/-/Rho-related protein from plants 1/-/fowlpox viral protein homolog1/chitin synthase homolog1/-/-/Sigma70-like-transcription factor 3/-/-/-/reaction to X. oryzae1/-/Rho-related protein from plants 5/double B-box zinc finger protein11/-/-/-/-/Rho-related protein from plants 8/-	31
BP	GO:0034204	lipid translocation	10/3483	24/22306	0.00201502	0.0496198	Zm00001d006384/Zm00001d014188/Zm00001d021972/Zm00001d025153/Zm00001d032334/Zm00001d032980/Zm00001d040456/Zm00001d045956/Zm00001d046194/Zm00001d047527	-/-/-/-/-/-/-/-/-/-	10
BP	GO:0043547	positive regulation of GTPase activity	29/3483	109/22306	0.00219672	0.0534864	Zm00001d004639/Zm00001d004640/Zm00001d005902/Zm00001d006192/Zm00001d006602/Zm00001d007081/Zm00001d011855/Zm00001d012126/Zm00001d013301/Zm00001d013840/Zm00001d013891/Zm00001d019287/Zm00001d021240/Zm00001d022387/Zm00001d022584/Zm00001d028464/Zm00001d028755/Zm00001d031534/Zm00001d034941/Zm00001d040408/Zm00001d047717/Zm00001d047727/Zm00001d047762/Zm00001d047793/Zm00001d048857/Zm00001d049155/Zm00001d0…	-/-/-/-/-/-/-/-/-/-/-/-/-/-/-/-/-/-/-/-/-/-/-/-/-/-/-/-/-	29
BP	GO:0051130	positive regulation of cellular component organization	26/3483	95/22306	0.00236629	0.056975	Zm00001d007806/Zm00001d007940/Zm00001d007943/Zm00001d011680/Zm00001d012751/Zm00001d015265/Zm00001d015886/Zm00001d016439/Zm00001d017106/Zm00001d018004/Zm00001d018484/Zm00001d018657/Zm00001d022042/Zm00001d025134/Zm00001d033414/Zm00001d034575/Zm00001d035183/Zm00001d035869/Zm00001d038812/Zm00001d042097/Zm00001d044802/Zm00001d045611/Zm00001d046539/Zm00001d050616/Zm00001d052273/Zm00001d053616	-/-/-/p15 (PC4 Sub1)-transcription factor 3/Homeobox-transcription factor 9/Homeobox-transcription factor 28/-/-/-/Rho-related protein from plants 1/-/-/eukaryotic translation initiation factor 5A/-/-/-/reaction to X. oryzae1/-/Homeobox-transcription factor 92/-/Rho-related protein from plants 5/-/-/-/Rho-related protein from plants 8/-	26
BP	GO:0006611	protein export from nucleus	24/3483	86/22306	0.0025805	0.0613337	Zm00001d002190/Zm00001d008259/Zm00001d010500/Zm00001d012030/Zm00001d014280/Zm00001d019335/Zm00001d020011/Zm00001d021590/Zm00001d022000/Zm00001d022125/Zm00001d022343/Zm00001d026263/Zm00001d028695/Zm00001d029133/Zm00001d030774/Zm00001d033764/Zm00001d034914/Zm00001d040389/Zm00001d043861/Zm00001d047534/Zm00001d048253/Zm00001d048741/Zm00001d051838/Zm00001d052453	severe depolymerization of actin1/-/-/-/-/-/-/-/-/-/-/-/-/-/-/-/-/-/-/-/-/-/-/-	24
BP	GO:0046165	alcohol biosynthetic process	21/3483	72/22306	0.00260392	0.0613337	Zm00001d001974/Zm00001d012312/Zm00001d025545/Zm00001d026064/Zm00001d026514/Zm00001d028024/Zm00001d028152/Zm00001d033110/Zm00001d033222/Zm00001d033551/Zm00001d033927/Zm00001d034387/Zm00001d034516/Zm00001d037110/Zm00001d037522/Zm00001d037731/Zm00001d039363/Zm00001d044175/Zm00001d045159/Zm00001d046135/Zm00001d048201	-/-/zeaxanthin epoxidase2/-/-/-/-/-/viviparous14/-/-/aldehyde oxidase1/-/-/-/-/-/-/-/-/-	21
BP	GO:0051225	spindle assembly	14/3483	41/22306	0.00268361	0.0618916	Zm00001d002186/Zm00001d007953/Zm00001d015020/Zm00001d015692/Zm00001d018624/Zm00001d022114/Zm00001d024292/Zm00001d025793/Zm00001d028073/Zm00001d034680/Zm00001d037084/Zm00001d038383/Zm00001d039474/Zm00001d048137	divergent spindle1/-/-/-/kinesin-related protein11/-/-/-/-/-/-/-/-/-	14
BP	GO:0051168	nuclear export	25/3483	91/22306	0.00268473	0.0618916	Zm00001d002190/Zm00001d007065/Zm00001d008259/Zm00001d010500/Zm00001d012030/Zm00001d014280/Zm00001d019335/Zm00001d020011/Zm00001d021590/Zm00001d022000/Zm00001d022125/Zm00001d022343/Zm00001d026263/Zm00001d028695/Zm00001d029133/Zm00001d030774/Zm00001d033764/Zm00001d034914/Zm00001d040389/Zm00001d043861/Zm00001d047534/Zm00001d048253/Zm00001d048741/Zm00001d051838/Zm00001d052453	severe depolymerization of actin1/-/-/-/-/-/-/-/-/-/-/-/-/-/-/-/-/-/-/-/-/-/-/-/-	25
BP	GO:0042327	positive regulation of phosphorylation	26/3483	96/22306	0.00277186	0.0630323	Zm00001d001978/Zm00001d005064/Zm00001d017392/Zm00001d017525/Zm00001d019681/Zm00001d020158/Zm00001d021584/Zm00001d023230/Zm00001d025449/Zm00001d026030/Zm00001d027790/Zm00001d028514/Zm00001d034055/Zm00001d035087/Zm00001d043194/Zm00001d045359/Zm00001d045967/Zm00001d047728/Zm00001d048104/Zm00001d051291/Zm00001d051307/Zm00001d052147/Zm00001d052327/Zm00001d053741/Zm00001d053891/Zm00001d053894	-/-/-/-/-/-/-/-/-/-/-/MAP kinase kinase kinase11/-/acidic ribosomal protein P1a/-/-/-/-/-/-/autophagy13a/-/-/autophagy11a/-/-	26
BP	GO:0008361	regulation of cell size	7/3483	14/22306	0.00279239	0.0630323	Zm00001d005064/Zm00001d005281/Zm00001d014327/Zm00001d023230/Zm00001d023908/Zm00001d037970/Zm00001d052327	-/-/-/-/-/-/-	7
BP	GO:0006360	transcription by RNA polymerase I	10/3483	25/22306	0.00289317	0.06317	Zm00001d012557/Zm00001d014575/Zm00001d023587/Zm00001d029055/Zm00001d031459/Zm00001d037832/Zm00001d039762/Zm00001d047966/Zm00001d049563/Zm00001d054013	-/-/-/-/required to maintain repression6/-/-/-/BSD-transcription factor 3/-	10
BP	GO:0051302	regulation of cell division	10/3483	25/22306	0.00289317	0.06317	Zm00001d005269/Zm00001d023760/Zm00001d023908/Zm00001d024953/Zm00001d029033/Zm00001d034082/Zm00001d034166/Zm00001d040768/Zm00001d047455/Zm00001d049297	-/chitin synthase homolog1/-/-/-/-/-/-/-/-	10
BP	GO:0097035	regulation of membrane lipid distribution	11/3483	29/22306	0.0029652	0.06317	Zm00001d002444/Zm00001d006384/Zm00001d014188/Zm00001d021972/Zm00001d025153/Zm00001d032334/Zm00001d032980/Zm00001d040456/Zm00001d045956/Zm00001d046194/Zm00001d047527	-/-/-/-/-/-/-/-/-/-/-	11
BP	GO:0010256	endomembrane system organization	35/3483	141/22306	0.0029764	0.06317	Zm00001d002012/Zm00001d002444/Zm00001d004639/Zm00001d004640/Zm00001d005902/Zm00001d006951/Zm00001d007075/Zm00001d009816/Zm00001d011213/Zm00001d012217/Zm00001d012653/Zm00001d012760/Zm00001d012851/Zm00001d013301/Zm00001d013314/Zm00001d014808/Zm00001d015450/Zm00001d018057/Zm00001d022378/Zm00001d024205/Zm00001d025939/Zm00001d028262/Zm00001d031637/Zm00001d032099/Zm00001d035889/Zm00001d037163/Zm00001d0…	-/-/-/-/-/-/-/-/-/-/-/-/-/-/vesicular transport protein1/-/SUN domain protein1/-/-/-/-/-/-/-/-/-/-/-/-/-/-/-/-/-/-	35
BP	GO:0030036	actin cytoskeleton organization	33/3483	131/22306	0.0030005	0.06317	Zm00001d002190/Zm00001d006372/Zm00001d006533/Zm00001d007806/Zm00001d008906/Zm00001d011854/Zm00001d012559/Zm00001d012966/Zm00001d013141/Zm00001d013389/Zm00001d017106/Zm00001d018004/Zm00001d018481/Zm00001d018484/Zm00001d018535/Zm00001d019495/Zm00001d023262/Zm00001d028550/Zm00001d029343/Zm00001d034616/Zm00001d035183/Zm00001d037252/Zm00001d037497/Zm00001d038845/Zm00001d040960/Zm00001d042097/Zm00001d0…	severe depolymerization of actin1/actin depolymerizing factor2/-/-/-/-/-/-/-/-/-/Rho-related protein from plants 1/myosin2/-/brick1/-/brick3/LIM-transcription factor 1/-/-/reaction to X. oryzae1/LIM-transcription factor 12/-/-/-/-/-/Rho-related protein from plants 5/double B-box zinc finger protein11/-/-/-/Rho-related protein from plants 8	33
BP	GO:0031401	positive regulation of protein modification process	32/3483	126/22306	0.0030007	0.06317	Zm00001d001978/Zm00001d005064/Zm00001d012751/Zm00001d015265/Zm00001d016034/Zm00001d017392/Zm00001d017525/Zm00001d019681/Zm00001d020158/Zm00001d021584/Zm00001d022231/Zm00001d023230/Zm00001d023520/Zm00001d025449/Zm00001d026030/Zm00001d027790/Zm00001d028514/Zm00001d032165/Zm00001d034055/Zm00001d035087/Zm00001d037246/Zm00001d038812/Zm00001d041911/Zm00001d045359/Zm00001d045967/Zm00001d047728/Zm00001d0…	-/-/Homeobox-transcription factor 9/Homeobox-transcription factor 28/cell division cycle202/-/-/-/-/-/-/-/-/-/-/-/MAP kinase kinase kinase11/-/-/acidic ribosomal protein P1a/-/Homeobox-transcription factor 92/-/-/-/-/-/-/autophagy13a/-/-/autophagy11a	32
BP	GO:0009790	embryo development	24/3483	87/22306	0.00304554	0.06317	Zm00001d007905/Zm00001d008743/Zm00001d013421/Zm00001d013891/Zm00001d015837/Zm00001d017982/Zm00001d021871/Zm00001d027412/Zm00001d028370/Zm00001d028818/Zm00001d034962/Zm00001d036629/Zm00001d037001/Zm00001d037832/Zm00001d038728/Zm00001d039693/Zm00001d045014/Zm00001d046973/Zm00001d047455/Zm00001d049190/Zm00001d050645/Zm00001d052197/Zm00001d053664/Zm00001d053930	-/-/-/-/-/-/-/dicer-like 101/-/defective kernel1/embryo specific2/-/-/-/trehalose-6-phosphate synthase12/-/chloroplast RNA splicing3/-/-/minichromosome maintenance7/-/-/-/-	24
BP	GO:0051028	mRNA transport	15/3483	46/22306	0.00319692	0.06317	Zm00001d008259/Zm00001d012030/Zm00001d014280/Zm00001d020011/Zm00001d022000/Zm00001d022343/Zm00001d026263/Zm00001d028695/Zm00001d029133/Zm00001d030774/Zm00001d040389/Zm00001d043861/Zm00001d048741/Zm00001d051838/Zm00001d052453	-/-/-/-/-/-/-/-/-/-/-/-/-/-/-	15
BP	GO:0010562	positive regulation of phosphorus metabolic process	26/3483	97/22306	0.00323489	0.06317	Zm00001d001978/Zm00001d005064/Zm00001d017392/Zm00001d017525/Zm00001d019681/Zm00001d020158/Zm00001d021584/Zm00001d023230/Zm00001d025449/Zm00001d026030/Zm00001d027790/Zm00001d028514/Zm00001d034055/Zm00001d035087/Zm00001d043194/Zm00001d045359/Zm00001d045967/Zm00001d047728/Zm00001d048104/Zm00001d051291/Zm00001d051307/Zm00001d052147/Zm00001d052327/Zm00001d053741/Zm00001d053891/Zm00001d053894	-/-/-/-/-/-/-/-/-/-/-/MAP kinase kinase kinase11/-/acidic ribosomal protein P1a/-/-/-/-/-/-/autophagy13a/-/-/autophagy11a/-/-	26
BP	GO:0045937	positive regulation of phosphate metabolic process	26/3483	97/22306	0.00323489	0.06317	Zm00001d001978/Zm00001d005064/Zm00001d017392/Zm00001d017525/Zm00001d019681/Zm00001d020158/Zm00001d021584/Zm00001d023230/Zm00001d025449/Zm00001d026030/Zm00001d027790/Zm00001d028514/Zm00001d034055/Zm00001d035087/Zm00001d043194/Zm00001d045359/Zm00001d045967/Zm00001d047728/Zm00001d048104/Zm00001d051291/Zm00001d051307/Zm00001d052147/Zm00001d052327/Zm00001d053741/Zm00001d053891/Zm00001d053894	-/-/-/-/-/-/-/-/-/-/-/MAP kinase kinase kinase11/-/acidic ribosomal protein P1a/-/-/-/-/-/-/autophagy13a/-/-/autophagy11a/-/-	26
BP	GO:0006120	mitochondrial electron transport, NADH to ubiquinone	6/3483	11/22306	0.0032728	0.06317	Zm00001d011750/Zm00001d014772/Zm00001d028773/Zm00001d034244/Zm00001d038658/Zm00001d047720	-/-/-/-/-/-	6
BP	GO:0051601	exocyst localization	6/3483	11/22306	0.0032728	0.06317	Zm00001d007760/Zm00001d013049/Zm00001d018060/Zm00001d019104/Zm00001d021828/Zm00001d033303	-/-/-/-/-/roothair defective1	6
BP	GO:0006338	chromatin remodeling	22/3483	78/22306	0.00330394	0.06317	Zm00001d002656/Zm00001d006798/Zm00001d007089/Zm00001d008614/Zm00001d014900/Zm00001d014977/Zm00001d015120/Zm00001d015765/Zm00001d017700/Zm00001d021931/Zm00001d022405/Zm00001d024816/Zm00001d026153/Zm00001d027326/Zm00001d029180/Zm00001d030108/Zm00001d034597/Zm00001d037313/Zm00001d037346/Zm00001d045944/Zm00001d048404/Zm00001d051507	-/-/-/-/PHD-transcription factor 29/brahma1/-/-/JUMONJI-transcription factor 15/-/-/-/-/actin related protein like4/-/JUMONJI-transcription factor 14/-/JUMONJI-transcription factor 7/splayed ATPase1/-/JUMONJI-transcription factor 20/-	22
BP	GO:0071166	ribonucleoprotein complex localization	22/3483	78/22306	0.00330394	0.06317	Zm00001d002190/Zm00001d008259/Zm00001d010500/Zm00001d012030/Zm00001d014280/Zm00001d020011/Zm00001d021590/Zm00001d022000/Zm00001d022125/Zm00001d022343/Zm00001d026263/Zm00001d028695/Zm00001d029133/Zm00001d030774/Zm00001d034914/Zm00001d040389/Zm00001d043861/Zm00001d047534/Zm00001d048253/Zm00001d048741/Zm00001d051838/Zm00001d052453	severe depolymerization of actin1/-/-/-/-/-/-/-/-/-/-/-/-/-/-/-/-/-/-/-/-/-	22
BP	GO:0071426	ribonucleoprotein complex export from nucleus	22/3483	78/22306	0.00330394	0.06317	Zm00001d002190/Zm00001d008259/Zm00001d010500/Zm00001d012030/Zm00001d014280/Zm00001d020011/Zm00001d021590/Zm00001d022000/Zm00001d022125/Zm00001d022343/Zm00001d026263/Zm00001d028695/Zm00001d029133/Zm00001d030774/Zm00001d034914/Zm00001d040389/Zm00001d043861/Zm00001d047534/Zm00001d048253/Zm00001d048741/Zm00001d051838/Zm00001d052453	severe depolymerization of actin1/-/-/-/-/-/-/-/-/-/-/-/-/-/-/-/-/-/-/-/-/-	22
BP	GO:0016441	posttranscriptional gene silencing	17/3483	55/22306	0.0033183	0.06317	Zm00001d012824/Zm00001d014977/Zm00001d017962/Zm00001d017982/Zm00001d018863/Zm00001d020011/Zm00001d022586/Zm00001d024018/Zm00001d025830/Zm00001d027412/Zm00001d029133/Zm00001d031908/Zm00001d037971/Zm00001d043861/Zm00001d044552/Zm00001d048432/Zm00001d048691	-/brahma1/-/-/hua enhancer1/-/-/-/dicer-like4/dicer-like 101/-/-/FHA-transcription factor 15/-/-/-/-	17
BP	GO:0019318	hexose metabolic process	43/3483	183/22306	0.0033222	0.06317	Zm00001d002377/Zm00001d005925/Zm00001d006221/Zm00001d006931/Zm00001d007383/Zm00001d008314/Zm00001d008613/Zm00001d013428/Zm00001d017119/Zm00001d018902/Zm00001d020771/Zm00001d020835/Zm00001d021310/Zm00001d022206/Zm00001d026311/Zm00001d028562/Zm00001d028762/Zm00001d028825/Zm00001d029008/Zm00001d030282/Zm00001d031669/Zm00001d032090/Zm00001d032346/Zm00001d032819/Zm00001d033746/Zm00001d034733/Zm00001d0…	-/-/triose phosphate isomerase2/-/-/-/-/phosphoglucomutase2/-/-/-/-/-/-/-/-/-/-/-/-/-/-/-/-/phosphoglucomutase1/-/-/-/-/-/-/-/-/-/fructokinase1/-/-/-/bZIP-transcription factor 105/-/-/-/-	43
BP	GO:0033043	regulation of organelle organization	62/3483	284/22306	0.0033232	0.06317	Zm00001d002243/Zm00001d002662/Zm00001d004639/Zm00001d004640/Zm00001d005269/Zm00001d005502/Zm00001d005902/Zm00001d007585/Zm00001d007806/Zm00001d007943/Zm00001d010656/Zm00001d012560/Zm00001d012751/Zm00001d013301/Zm00001d013440/Zm00001d014913/Zm00001d015265/Zm00001d017106/Zm00001d018004/Zm00001d018218/Zm00001d018484/Zm00001d018535/Zm00001d018657/Zm00001d019789/Zm00001d019920/Zm00001d021145/Zm00001d0…	-/cyclin8/-/-/-/-/-/-/-/-/cyclin1/cyclin7/Homeobox-transcription factor 9/-/-/-/Homeobox-transcription factor 28/-/Rho-related protein from plants 1/GNAT-transcription factor 26/-/brick1/-/-/-/-/-/-/-/-/-/-/-/-/-/-/-/-/reaction to X. oryzae1/-/-/-/-/Homeobox-transcription factor 92/-/-/-/-/-/Rho-related protein from plants 5/double B-box zinc finger protein11/-/-/-/-/-/-/minichromosome maintenanc…	62
BP	GO:0030029	actin filament-based process	33/3483	132/22306	0.00341287	0.064127	Zm00001d002190/Zm00001d006372/Zm00001d006533/Zm00001d007806/Zm00001d008906/Zm00001d011854/Zm00001d012559/Zm00001d012966/Zm00001d013141/Zm00001d013389/Zm00001d017106/Zm00001d018004/Zm00001d018481/Zm00001d018484/Zm00001d018535/Zm00001d019495/Zm00001d023262/Zm00001d028550/Zm00001d029343/Zm00001d034616/Zm00001d035183/Zm00001d037252/Zm00001d037497/Zm00001d038845/Zm00001d040960/Zm00001d042097/Zm00001d0…	severe depolymerization of actin1/actin depolymerizing factor2/-/-/-/-/-/-/-/-/-/Rho-related protein from plants 1/myosin2/-/brick1/-/brick3/LIM-transcription factor 1/-/-/reaction to X. oryzae1/LIM-transcription factor 12/-/-/-/-/-/Rho-related protein from plants 5/double B-box zinc finger protein11/-/-/-/Rho-related protein from plants 8	33
BP	GO:0006405	RNA export from nucleus	23/3483	83/22306	0.00345415	0.064127	Zm00001d002190/Zm00001d007065/Zm00001d008259/Zm00001d010500/Zm00001d012030/Zm00001d014280/Zm00001d020011/Zm00001d021590/Zm00001d022000/Zm00001d022125/Zm00001d022343/Zm00001d026263/Zm00001d028695/Zm00001d029133/Zm00001d030774/Zm00001d034914/Zm00001d040389/Zm00001d043861/Zm00001d047534/Zm00001d048253/Zm00001d048741/Zm00001d051838/Zm00001d052453	severe depolymerization of actin1/-/-/-/-/-/-/-/-/-/-/-/-/-/-/-/-/-/-/-/-/-/-	23
BP	GO:0007059	chromosome segregation	41/3483	173/22306	0.00346233	0.064127	Zm00001d002056/Zm00001d002154/Zm00001d003151/Zm00001d003274/Zm00001d006499/Zm00001d007233/Zm00001d007585/Zm00001d007679/Zm00001d007943/Zm00001d009780/Zm00001d014913/Zm00001d018657/Zm00001d019343/Zm00001d019789/Zm00001d021504/Zm00001d021635/Zm00001d023279/Zm00001d023839/Zm00001d024094/Zm00001d024953/Zm00001d025789/Zm00001d028538/Zm00001d031847/Zm00001d032575/Zm00001d034166/Zm00001d034239/Zm00001d0…	-/meiotic recombination protein 11 homolog A/-/-/-/-/-/-/-/gamma-tubulin1/-/-/GNAT-transcription factor 32/-/-/-/-/-/-/-/-/-/-/-/-/-/-/-/-/-/-/-/-/-/centromere protein C 1/-/-/-/-/-/-	41
BP	GO:0106074	aminoacyl-tRNA metabolism involved in translational fidelity	8/3483	18/22306	0.0035108	0.0644738	Zm00001d002585/Zm00001d005558/Zm00001d006296/Zm00001d007905/Zm00001d018274/Zm00001d036741/Zm00001d036888/Zm00001d046581	-/-/-/-/-/-/-/-	8
BP	GO:0140014	mitotic nuclear division	38/3483	158/22306	0.00365262	0.0665145	Zm00001d002056/Zm00001d002662/Zm00001d003151/Zm00001d006499/Zm00001d007233/Zm00001d007585/Zm00001d007943/Zm00001d009780/Zm00001d010656/Zm00001d012560/Zm00001d018657/Zm00001d019343/Zm00001d019789/Zm00001d021635/Zm00001d022114/Zm00001d023279/Zm00001d023839/Zm00001d025789/Zm00001d025793/Zm00001d031847/Zm00001d033365/Zm00001d034239/Zm00001d034680/Zm00001d037377/Zm00001d037979/Zm00001d037981/Zm00001d0…	-/cyclin8/-/-/-/-/-/gamma-tubulin1/cyclin1/cyclin7/-/GNAT-transcription factor 32/-/-/-/-/-/-/-/-/-/-/-/-/-/-/-/-/-/-/centromere protein C 1/-/-/-/-/-/-/-	38
BP	GO:0043038	amino acid activation	27/3483	103/22306	0.00382247	0.0684569	Zm00001d002104/Zm00001d002585/Zm00001d003879/Zm00001d005558/Zm00001d006296/Zm00001d006322/Zm00001d006377/Zm00001d007369/Zm00001d007905/Zm00001d008846/Zm00001d010868/Zm00001d012787/Zm00001d015037/Zm00001d018274/Zm00001d024492/Zm00001d024624/Zm00001d028218/Zm00001d031236/Zm00001d033647/Zm00001d035802/Zm00001d036741/Zm00001d037538/Zm00001d039547/Zm00001d039808/Zm00001d039816/Zm00001d045605/Zm00001d0…	-/-/-/-/-/-/-/-/-/-/-/-/-/-/-/-/-/-/-/-/-/-/Glutamine--tRNA ligase cytoplasmic1/-/-/-/-	27
BP	GO:0043039	tRNA aminoacylation	27/3483	103/22306	0.00382247	0.0684569	Zm00001d002104/Zm00001d002585/Zm00001d003879/Zm00001d005558/Zm00001d006296/Zm00001d006322/Zm00001d006377/Zm00001d007369/Zm00001d007905/Zm00001d008846/Zm00001d010868/Zm00001d012787/Zm00001d015037/Zm00001d018274/Zm00001d024492/Zm00001d024624/Zm00001d028218/Zm00001d031236/Zm00001d033647/Zm00001d035802/Zm00001d036741/Zm00001d037538/Zm00001d039547/Zm00001d039808/Zm00001d039816/Zm00001d045605/Zm00001d0…	-/-/-/-/-/-/-/-/-/-/-/-/-/-/-/-/-/-/-/-/-/-/Glutamine--tRNA ligase cytoplasmic1/-/-/-/-	27
BP	GO:0051347	positive regulation of transferase activity	29/3483	113/22306	0.00389272	0.0687691	Zm00001d001978/Zm00001d005064/Zm00001d016034/Zm00001d017392/Zm00001d017525/Zm00001d019681/Zm00001d020158/Zm00001d021584/Zm00001d022231/Zm00001d023230/Zm00001d025449/Zm00001d026030/Zm00001d026313/Zm00001d027790/Zm00001d028514/Zm00001d032165/Zm00001d034055/Zm00001d035087/Zm00001d037246/Zm00001d045359/Zm00001d045967/Zm00001d047728/Zm00001d048104/Zm00001d051291/Zm00001d051307/Zm00001d052147/Zm00001d0…	-/-/cell division cycle202/-/-/-/-/-/-/-/-/-/-/-/MAP kinase kinase kinase11/-/-/acidic ribosomal protein P1a/-/-/-/-/-/-/autophagy13a/-/-/-/-	29
BP	GO:0006607	NLS-bearing protein import into nucleus	9/3483	22/22306	0.00390337	0.0687691	Zm00001d008345/Zm00001d009850/Zm00001d021893/Zm00001d022536/Zm00001d030694/Zm00001d033632/Zm00001d037606/Zm00001d038021/Zm00001d041556	-/importin1/-/-/-/-/-/-/-	9
BP	GO:0043044	ATP-dependent chromatin remodeling	11/3483	30/22306	0.00403	0.0704275	Zm00001d002656/Zm00001d006798/Zm00001d008614/Zm00001d014977/Zm00001d015765/Zm00001d024816/Zm00001d026153/Zm00001d027326/Zm00001d029180/Zm00001d037346/Zm00001d051507	-/-/-/brahma1/-/-/-/actin related protein like4/-/splayed ATPase1/-	11
BP	GO:0006399	tRNA metabolic process	63/3483	292/22306	0.00410984	0.0712482	Zm00001d002104/Zm00001d002585/Zm00001d003621/Zm00001d003879/Zm00001d004196/Zm00001d005558/Zm00001d006296/Zm00001d006322/Zm00001d006377/Zm00001d007369/Zm00001d007905/Zm00001d008846/Zm00001d010868/Zm00001d012787/Zm00001d012794/Zm00001d013673/Zm00001d015037/Zm00001d015086/Zm00001d015999/Zm00001d017897/Zm00001d018070/Zm00001d018148/Zm00001d018274/Zm00001d020541/Zm00001d020978/Zm00001d021241/Zm00001d0…	-/-/-/-/-/-/-/-/-/-/-/-/-/-/-/-/-/-/-/-/-/-/-/-/-/-/-/-/-/-/-/-/-/-/-/-/-/-/-/-/-/-/-/-/-/-/-/-/-/-/-/-/-/Glutamine--tRNA ligase cytoplasmic1/-/-/-/-/-/-/-/-/-	63
BP	GO:0051651	maintenance of location in cell	14/3483	43/22306	0.00439947	0.075664	Zm00001d004655/Zm00001d013421/Zm00001d021306/Zm00001d028596/Zm00001d030935/Zm00001d035088/Zm00001d035089/Zm00001d036443/Zm00001d038754/Zm00001d040178/Zm00001d045323/Zm00001d046973/Zm00001d047074/Zm00001d053262	-/-/-/-/-/-/-/-/-/-/double B-box zinc finger protein11/-/-/-	14
BP	GO:0072595	maintenance of protein localization in organelle	7/3483	15/22306	0.00453497	0.0773801	Zm00001d004655/Zm00001d013421/Zm00001d021306/Zm00001d028596/Zm00001d036443/Zm00001d038754/Zm00001d040178	-/-/-/-/-/-/-	7
BP	GO:0045860	positive regulation of protein kinase activity	22/3483	80/22306	0.00462103	0.0782327	Zm00001d001978/Zm00001d005064/Zm00001d017392/Zm00001d017525/Zm00001d019681/Zm00001d020158/Zm00001d021584/Zm00001d023230/Zm00001d025449/Zm00001d026030/Zm00001d027790/Zm00001d028514/Zm00001d034055/Zm00001d035087/Zm00001d045359/Zm00001d045967/Zm00001d047728/Zm00001d048104/Zm00001d051291/Zm00001d051307/Zm00001d052147/Zm00001d052327	-/-/-/-/-/-/-/-/-/-/-/MAP kinase kinase kinase11/-/acidic ribosomal protein P1a/-/-/-/-/-/autophagy13a/-/-	22
BP	GO:0016049	cell growth	19/3483	66/22306	0.00476423	0.0789759	Zm00001d005064/Zm00001d007158/Zm00001d007208/Zm00001d008743/Zm00001d010974/Zm00001d012212/Zm00001d019881/Zm00001d021641/Zm00001d023230/Zm00001d023262/Zm00001d023908/Zm00001d028818/Zm00001d032099/Zm00001d033597/Zm00001d034049/Zm00001d035030/Zm00001d044273/Zm00001d046973/Zm00001d052327	-/-/-/-/PHD-transcription factor 17/gibberellin 20-oxidase5/-/-/-/brick3/-/defective kernel1/-/-/-/-/-/-/-	19
BP	GO:0009793	embryo development ending in seed dormancy	23/3483	85/22306	0.00476827	0.0789759	Zm00001d007905/Zm00001d008743/Zm00001d013421/Zm00001d013891/Zm00001d015837/Zm00001d017982/Zm00001d021871/Zm00001d028370/Zm00001d028818/Zm00001d034962/Zm00001d036629/Zm00001d037001/Zm00001d037832/Zm00001d038728/Zm00001d039693/Zm00001d045014/Zm00001d046973/Zm00001d047455/Zm00001d049190/Zm00001d050645/Zm00001d052197/Zm00001d053664/Zm00001d053930	-/-/-/-/-/-/-/-/defective kernel1/embryo specific2/-/-/-/trehalose-6-phosphate synthase12/-/chloroplast RNA splicing3/-/-/minichromosome maintenance7/-/-/-/-	23
BP	GO:0006888	ER to Golgi vesicle-mediated transport	41/3483	176/22306	0.00477427	0.0789759	Zm00001d003460/Zm00001d003904/Zm00001d004639/Zm00001d004640/Zm00001d004655/Zm00001d004667/Zm00001d005902/Zm00001d006249/Zm00001d006939/Zm00001d006951/Zm00001d007075/Zm00001d007585/Zm00001d012853/Zm00001d013301/Zm00001d016183/Zm00001d016402/Zm00001d017456/Zm00001d018057/Zm00001d019287/Zm00001d020485/Zm00001d021306/Zm00001d022378/Zm00001d023943/Zm00001d026283/Zm00001d031637/Zm00001d033454/Zm00001d0…	-/-/-/-/-/-/-/-/-/-/-/-/-/-/-/-/ypt homolog4/-/-/-/-/-/-/-/-/GRMZM2G039373/-/-/-/-/-/-/-/-/-/-/-/-/-/-/-	41
BP	GO:0051640	organelle localization	50/3483	224/22306	0.00495614	0.0813633	Zm00001d002056/Zm00001d002148/Zm00001d002190/Zm00001d004159/Zm00001d004639/Zm00001d004640/Zm00001d005902/Zm00001d007065/Zm00001d007760/Zm00001d010500/Zm00001d011716/Zm00001d013049/Zm00001d013301/Zm00001d013700/Zm00001d015890/Zm00001d017848/Zm00001d019104/Zm00001d020485/Zm00001d021590/Zm00001d021828/Zm00001d022502/Zm00001d023839/Zm00001d023943/Zm00001d024205/Zm00001d024953/Zm00001d025398/Zm00001d0…	-/-/severe depolymerization of actin1/-/-/-/-/-/-/-/-/-/-/-/-/-/-/-/-/-/-/-/-/-/-/-/-/-/-/-/-/-/-/-/-/-/-/-/-/centromere protein C 1/-/double B-box zinc finger protein11/-/-/-/-/-/-/-/-	50
BP	GO:0065002	intracellular protein transmembrane transport	32/3483	130/22306	0.005003	0.0813915	Zm00001d000349/Zm00001d001882/Zm00001d002462/Zm00001d003502/Zm00001d003846/Zm00001d003913/Zm00001d004051/Zm00001d004119/Zm00001d005373/Zm00001d006214/Zm00001d006588/Zm00001d012930/Zm00001d014090/Zm00001d017847/Zm00001d021301/Zm00001d025453/Zm00001d027699/Zm00001d028485/Zm00001d028971/Zm00001d032615/Zm00001d032773/Zm00001d033317/Zm00001d034358/Zm00001d034805/Zm00001d037422/Zm00001d039111/Zm00001d0…	-/-/-/-/-/high chlorophyll fluorescence106/-/-/-/-/-/-/chaperonin 1/-/LON peptidase1/-/-/-/-/-/-/thylakoid assembly4/-/-/-/-/-/-/-/-/-/-	32
BP	GO:0006418	tRNA aminoacylation for protein translation	26/3483	100/22306	0.00503298	0.0813915	Zm00001d002585/Zm00001d003879/Zm00001d005558/Zm00001d006296/Zm00001d006322/Zm00001d006377/Zm00001d007369/Zm00001d007905/Zm00001d008846/Zm00001d010868/Zm00001d012787/Zm00001d015037/Zm00001d018274/Zm00001d024492/Zm00001d024624/Zm00001d028218/Zm00001d031236/Zm00001d033647/Zm00001d035802/Zm00001d036741/Zm00001d037538/Zm00001d039547/Zm00001d039808/Zm00001d039816/Zm00001d045605/Zm00001d046581	-/-/-/-/-/-/-/-/-/-/-/-/-/-/-/-/-/-/-/-/-/Glutamine--tRNA ligase cytoplasmic1/-/-/-/-	26
BP	GO:0098657	import into cell	29/3483	115/22306	0.00509021	0.0817073	Zm00001d007270/Zm00001d007692/Zm00001d007889/Zm00001d008863/Zm00001d009452/Zm00001d011696/Zm00001d012307/Zm00001d012761/Zm00001d014368/Zm00001d017050/Zm00001d020892/Zm00001d021844/Zm00001d022504/Zm00001d023218/Zm00001d025853/Zm00001d027333/Zm00001d028330/Zm00001d030868/Zm00001d037484/Zm00001d037744/Zm00001d037970/Zm00001d038892/Zm00001d039162/Zm00001d039296/Zm00001d039409/Zm00001d041647/Zm00001d0…	clathrin coat assembly protein AP17/-/-/-/-/-/-/-/-/-/-/-/-/-/-/-/-/-/-/-/-/-/-/-/-/-/-/-/-	29
BP	GO:0032506	cytokinetic process	8/3483	19/22306	0.00524267	0.082926	Zm00001d005269/Zm00001d023760/Zm00001d023908/Zm00001d027412/Zm00001d034082/Zm00001d042262/Zm00001d044273/Zm00001d053930	-/chitin synthase homolog1/-/dicer-like 101/-/-/-/-	8
BP	GO:1902410	mitotic cytokinetic process	8/3483	19/22306	0.00524267	0.082926	Zm00001d005269/Zm00001d023760/Zm00001d023908/Zm00001d027412/Zm00001d034082/Zm00001d042262/Zm00001d044273/Zm00001d053930	-/chitin synthase homolog1/-/dicer-like 101/-/-/-/-	8
BP	GO:0009653	anatomical structure morphogenesis	47/3483	209/22306	0.00544283	0.0854682	Zm00001d002144/Zm00001d004639/Zm00001d004640/Zm00001d005902/Zm00001d007158/Zm00001d008654/Zm00001d008743/Zm00001d009520/Zm00001d012212/Zm00001d013301/Zm00001d013389/Zm00001d014977/Zm00001d016452/Zm00001d018004/Zm00001d019881/Zm00001d020970/Zm00001d021641/Zm00001d023262/Zm00001d023908/Zm00001d024205/Zm00001d027257/Zm00001d027412/Zm00001d027633/Zm00001d028094/Zm00001d028152/Zm00001d028370/Zm00001d0…	-/-/-/-/-/-/-/-/gibberellin 20-oxidase5/-/-/brahma1/-/Rho-related protein from plants 1/-/dihydroflavonoid reductase1/-/brick3/-/-/-/dicer-like 101/-/-/-/-/defective kernel1/-/-/GRMZM2G039373/-/-/-/enhancer of zeste1/-/-/-/Rho-related protein from plants 5/-/-/-/-/-/minichromosome maintenance7/-/Rho-related protein from plants 8/-	47
BP	GO:0045332	phospholipid translocation	9/3483	23/22306	0.00553529	0.0857752	Zm00001d014188/Zm00001d021972/Zm00001d025153/Zm00001d032334/Zm00001d032980/Zm00001d040456/Zm00001d045956/Zm00001d046194/Zm00001d047527	-/-/-/-/-/-/-/-/-	9
BP	GO:0006487	protein N-linked glycosylation	14/3483	44/22306	0.00554154	0.0857752	Zm00001d002944/Zm00001d005248/Zm00001d017085/Zm00001d017767/Zm00001d025989/Zm00001d026064/Zm00001d027484/Zm00001d028152/Zm00001d028731/Zm00001d032400/Zm00001d034659/Zm00001d040435/Zm00001d042335/Zm00001d042398	-/-/-/-/Aux/IAA-transcription factor 43/-/-/-/-/-/-/-/-/-	14
BP	GO:0000278	mitotic cell cycle	83/3483	407/22306	0.0056392	0.0865571	Zm00001d002056/Zm00001d002154/Zm00001d002662/Zm00001d003151/Zm00001d004709/Zm00001d005250/Zm00001d005269/Zm00001d006499/Zm00001d007233/Zm00001d007407/Zm00001d007585/Zm00001d007943/Zm00001d008216/Zm00001d009780/Zm00001d010656/Zm00001d011282/Zm00001d012560/Zm00001d014124/Zm00001d016581/Zm00001d017215/Zm00001d018009/Zm00001d018057/Zm00001d018657/Zm00001d019343/Zm00001d019670/Zm00001d019789/Zm00001d0…	-/meiotic recombination protein 11 homolog A/cyclin8/-/-/cellulose synthase9/-/-/-/related to retinoblastoma1/-/-/-/gamma-tubulin1/cyclin1/-/cyclin7/-/-/-/-/-/-/GNAT-transcription factor 32/-/-/-/-/-/-/-/chitin synthase homolog1/-/-/-/-/-/autophagy4b/dicer-like 101/-/-/roothairless6/retinoblastoma family3/-/-/-/-/-/-/cellulose synthase6/-/-/-/-/-/-/-/-/-/-/-/-/centromere protein C 1/-/-/-/-/origi…	83
BP	GO:0035437	maintenance of protein localization in endoplasmic reticulum	6/3483	12/22306	0.0056855	0.0865571	Zm00001d004655/Zm00001d013421/Zm00001d021306/Zm00001d036443/Zm00001d038754/Zm00001d040178	-/-/-/-/-/-	6
BP	GO:0032984	protein-containing complex disassembly	31/3483	126/22306	0.00571189	0.0865571	Zm00001d001983/Zm00001d002822/Zm00001d006372/Zm00001d007692/Zm00001d007940/Zm00001d012052/Zm00001d012966/Zm00001d013141/Zm00001d014124/Zm00001d014368/Zm00001d015893/Zm00001d018330/Zm00001d022042/Zm00001d025100/Zm00001d025715/Zm00001d025948/Zm00001d026621/Zm00001d027707/Zm00001d029343/Zm00001d031581/Zm00001d032598/Zm00001d034239/Zm00001d034575/Zm00001d035051/Zm00001d037497/Zm00001d041647/Zm00001d0…	-/-/actin depolymerizing factor2/-/-/-/-/-/-/-/-/-/eukaryotic translation initiation factor 5A/-/-/-/-/-/-/-/-/-/-/-/-/-/-/-/-/-/-	31
BP	GO:0007015	actin filament organization	29/3483	116/22306	0.00579608	0.0872229	Zm00001d006372/Zm00001d006533/Zm00001d007806/Zm00001d011854/Zm00001d012559/Zm00001d012966/Zm00001d013141/Zm00001d013389/Zm00001d017106/Zm00001d018004/Zm00001d018481/Zm00001d018484/Zm00001d018535/Zm00001d019495/Zm00001d023262/Zm00001d028550/Zm00001d029343/Zm00001d035183/Zm00001d037252/Zm00001d037497/Zm00001d038845/Zm00001d040960/Zm00001d042097/Zm00001d043667/Zm00001d044802/Zm00001d045323/Zm00001d0…	actin depolymerizing factor2/-/-/-/-/-/-/-/-/Rho-related protein from plants 1/myosin2/-/brick1/-/brick3/LIM-transcription factor 1/-/reaction to X. oryzae1/LIM-transcription factor 12/-/-/-/-/-/Rho-related protein from plants 5/double B-box zinc finger protein11/-/-/Rho-related protein from plants 8	29
BP	GO:0031399	regulation of protein modification process	68/3483	324/22306	0.00584866	0.0874073	Zm00001d001978/Zm00001d002272/Zm00001d002662/Zm00001d002778/Zm00001d003401/Zm00001d005064/Zm00001d010656/Zm00001d011233/Zm00001d011282/Zm00001d012560/Zm00001d012667/Zm00001d012751/Zm00001d014037/Zm00001d015265/Zm00001d016034/Zm00001d017215/Zm00001d017392/Zm00001d017525/Zm00001d019263/Zm00001d019681/Zm00001d020158/Zm00001d021584/Zm00001d022231/Zm00001d023230/Zm00001d023520/Zm00001d025449/Zm00001d0…	-/-/cyclin8/CK2 regulatory subunit B1/general regulatory factor1/-/cyclin1/-/-/cyclin7/-/Homeobox-transcription factor 9/-/Homeobox-transcription factor 28/cell division cycle202/-/-/-/-/-/-/-/-/-/-/-/-/-/-/cyclin-dependent kinase inhibitor3/-/MAP kinase kinase kinase11/-/-/-/-/-/-/-/acidic ribosomal protein P1a/-/-/-/Homeobox-transcription factor 92/-/-/-/-/-/-/-/-/-/-/-/-/-/-/-/autophagy13a/-/-…	68
BP	GO:0006479	protein methylation	34/3483	142/22306	0.00616672	0.0909066	Zm00001d002938/Zm00001d003275/Zm00001d004739/Zm00001d005445/Zm00001d005563/Zm00001d006323/Zm00001d006369/Zm00001d009723/Zm00001d010646/Zm00001d011490/Zm00001d012751/Zm00001d015228/Zm00001d015265/Zm00001d016804/Zm00001d017798/Zm00001d019195/Zm00001d019907/Zm00001d020038/Zm00001d022469/Zm00001d023333/Zm00001d023914/Zm00001d024420/Zm00001d032633/Zm00001d036004/Zm00001d036296/Zm00001d038541/Zm00001d0…	set domain gene107/-/-/-/sdg110b/-/set domain gene116/plastid transcriptionally active14/set domain gene105/arabidopsis trithorax homolog5/Homeobox-transcription factor 9/-/Homeobox-transcription factor 28/-/-/-/set domain gene128/set domain gene110a/-/set domain gene127/PHD-transcription factor 4/-/-/-/enhancer of zeste1/set domain gene111/Homeobox-transcription factor 92/-/-/-/enhancer of zeste…	34
BP	GO:0008213	protein alkylation	34/3483	142/22306	0.00616672	0.0909066	Zm00001d002938/Zm00001d003275/Zm00001d004739/Zm00001d005445/Zm00001d005563/Zm00001d006323/Zm00001d006369/Zm00001d009723/Zm00001d010646/Zm00001d011490/Zm00001d012751/Zm00001d015228/Zm00001d015265/Zm00001d016804/Zm00001d017798/Zm00001d019195/Zm00001d019907/Zm00001d020038/Zm00001d022469/Zm00001d023333/Zm00001d023914/Zm00001d024420/Zm00001d032633/Zm00001d036004/Zm00001d036296/Zm00001d038541/Zm00001d0…	set domain gene107/-/-/-/sdg110b/-/set domain gene116/plastid transcriptionally active14/set domain gene105/arabidopsis trithorax homolog5/Homeobox-transcription factor 9/-/Homeobox-transcription factor 28/-/-/-/set domain gene128/set domain gene110a/-/set domain gene127/PHD-transcription factor 4/-/-/-/enhancer of zeste1/set domain gene111/Homeobox-transcription factor 92/-/-/-/enhancer of zeste…	34
BP	GO:0006928	movement of cell or subcellular component	32/3483	132/22306	0.00636624	0.0922845	Zm00001d001928/Zm00001d002186/Zm00001d003644/Zm00001d009233/Zm00001d011405/Zm00001d013859/Zm00001d016273/Zm00001d018004/Zm00001d018009/Zm00001d018246/Zm00001d018441/Zm00001d018535/Zm00001d018624/Zm00001d019670/Zm00001d021269/Zm00001d023262/Zm00001d025149/Zm00001d025951/Zm00001d026548/Zm00001d032464/Zm00001d034239/Zm00001d034590/Zm00001d035526/Zm00001d036090/Zm00001d037599/Zm00001d038383/Zm00001d0…	-/divergent spindle1/-/-/-/-/-/Rho-related protein from plants 1/-/-/-/brick1/kinesin-related protein11/-/-/brick3/-/kinesin-related protein15/-/-/-/-/-/-/kinesin-related protein9/-/-/Rho-related protein from plants 5/-/-/Rho-related protein from plants 8/-	32
BP	GO:0048316	seed development	32/3483	132/22306	0.00636624	0.0922845	Zm00001d005281/Zm00001d007905/Zm00001d008743/Zm00001d013421/Zm00001d013891/Zm00001d015837/Zm00001d017427/Zm00001d017742/Zm00001d017982/Zm00001d021871/Zm00001d022502/Zm00001d027412/Zm00001d028370/Zm00001d028818/Zm00001d031494/Zm00001d034962/Zm00001d036629/Zm00001d037001/Zm00001d037110/Zm00001d037832/Zm00001d038728/Zm00001d039693/Zm00001d040724/Zm00001d042720/Zm00001d045014/Zm00001d046973/Zm00001d0…	-/-/-/-/-/-/-/GRF-transcription factor 6/-/-/-/dicer-like 101/-/defective kernel1/-/embryo specific2/-/-/-/-/trehalose-6-phosphate synthase12/-/-/-/chloroplast RNA splicing3/-/-/minichromosome maintenance7/-/-/-/-	32
BP	GO:0050657	nucleic acid transport	23/3483	87/22306	0.00647312	0.0922845	Zm00001d002190/Zm00001d007065/Zm00001d008259/Zm00001d010500/Zm00001d012030/Zm00001d014280/Zm00001d020011/Zm00001d021590/Zm00001d022000/Zm00001d022125/Zm00001d022343/Zm00001d026263/Zm00001d028695/Zm00001d029133/Zm00001d030774/Zm00001d034914/Zm00001d040389/Zm00001d043861/Zm00001d047534/Zm00001d048253/Zm00001d048741/Zm00001d051838/Zm00001d052453	severe depolymerization of actin1/-/-/-/-/-/-/-/-/-/-/-/-/-/-/-/-/-/-/-/-/-/-	23
BP	GO:0050658	RNA transport	23/3483	87/22306	0.00647312	0.0922845	Zm00001d002190/Zm00001d007065/Zm00001d008259/Zm00001d010500/Zm00001d012030/Zm00001d014280/Zm00001d020011/Zm00001d021590/Zm00001d022000/Zm00001d022125/Zm00001d022343/Zm00001d026263/Zm00001d028695/Zm00001d029133/Zm00001d030774/Zm00001d034914/Zm00001d040389/Zm00001d043861/Zm00001d047534/Zm00001d048253/Zm00001d048741/Zm00001d051838/Zm00001d052453	severe depolymerization of actin1/-/-/-/-/-/-/-/-/-/-/-/-/-/-/-/-/-/-/-/-/-/-	23
BP	GO:0051236	establishment of RNA localization	23/3483	87/22306	0.00647312	0.0922845	Zm00001d002190/Zm00001d007065/Zm00001d008259/Zm00001d010500/Zm00001d012030/Zm00001d014280/Zm00001d020011/Zm00001d021590/Zm00001d022000/Zm00001d022125/Zm00001d022343/Zm00001d026263/Zm00001d028695/Zm00001d029133/Zm00001d030774/Zm00001d034914/Zm00001d040389/Zm00001d043861/Zm00001d047534/Zm00001d048253/Zm00001d048741/Zm00001d051838/Zm00001d052453	severe depolymerization of actin1/-/-/-/-/-/-/-/-/-/-/-/-/-/-/-/-/-/-/-/-/-/-	23
BP	GO:0007006	mitochondrial membrane organization	12/3483	36/22306	0.00658311	0.0925927	Zm00001d003846/Zm00001d004051/Zm00001d010522/Zm00001d012017/Zm00001d012930/Zm00001d015837/Zm00001d017847/Zm00001d023220/Zm00001d027699/Zm00001d042329/Zm00001d045181/Zm00001d053664	-/-/-/-/-/-/-/-/-/-/-/-	12
BP	GO:0043254	regulation of protein complex assembly	25/3483	97/22306	0.00661764	0.0925927	Zm00001d002243/Zm00001d004639/Zm00001d004640/Zm00001d005902/Zm00001d007806/Zm00001d011680/Zm00001d013301/Zm00001d015886/Zm00001d016439/Zm00001d017106/Zm00001d018004/Zm00001d018484/Zm00001d024205/Zm00001d028585/Zm00001d029343/Zm00001d033414/Zm00001d035183/Zm00001d044802/Zm00001d045323/Zm00001d046539/Zm00001d048857/Zm00001d049155/Zm00001d050616/Zm00001d052273/Zm00001d053616	-/-/-/-/-/p15 (PC4 Sub1)-transcription factor 3/-/-/-/-/Rho-related protein from plants 1/-/-/Sigma70-like-transcription factor 3/-/-/reaction to X. oryzae1/Rho-related protein from plants 5/double B-box zinc finger protein11/-/-/-/-/Rho-related protein from plants 8/-	25
BP	GO:0006066	alcohol metabolic process	28/3483	112/22306	0.00662292	0.0925927	Zm00001d001974/Zm00001d002085/Zm00001d006221/Zm00001d009520/Zm00001d012312/Zm00001d018468/Zm00001d021310/Zm00001d025545/Zm00001d026064/Zm00001d026514/Zm00001d027445/Zm00001d028024/Zm00001d028152/Zm00001d033110/Zm00001d033222/Zm00001d033551/Zm00001d033795/Zm00001d033927/Zm00001d034387/Zm00001d034516/Zm00001d037110/Zm00001d037522/Zm00001d037731/Zm00001d039363/Zm00001d044175/Zm00001d045159/Zm00001d0…	-/-/triose phosphate isomerase2/-/-/formaldehyde dehydrogenase homolog1/-/zeaxanthin epoxidase2/-/-/-/-/-/-/viviparous14/-/-/-/aldehyde oxidase1/-/-/-/-/-/-/-/-/-	28
BP	GO:0042176	regulation of protein catabolic process	14/3483	45/22306	0.00690995	0.0932644	Zm00001d002373/Zm00001d003207/Zm00001d006011/Zm00001d015259/Zm00001d015886/Zm00001d024342/Zm00001d025750/Zm00001d026265/Zm00001d028285/Zm00001d031178/Zm00001d035574/Zm00001d049357/Zm00001d050090/Zm00001d050616	-/-/-/-/-/-/-/-/-/-/-/-/-/-	14
BP	GO:0016925	protein sumoylation	7/3483	16/22306	0.00698638	0.0932644	Zm00001d010974/Zm00001d012042/Zm00001d012044/Zm00001d021966/Zm00001d027427/Zm00001d044602/Zm00001d048473	PHD-transcription factor 17/small ubiquitin-related modifier1a/small ubiquitin-related modifier1b/-/ubiquitin conjugating enzyme3/-/-	7
BP	GO:0035195	gene silencing by miRNA	7/3483	16/22306	0.00698638	0.0932644	Zm00001d012824/Zm00001d014977/Zm00001d027412/Zm00001d029133/Zm00001d031908/Zm00001d037971/Zm00001d043861	-/brahma1/dicer-like 101/-/-/FHA-transcription factor 15/-	7
BP	GO:1901407	regulation of phosphorylation of RNA polymerase II C-terminal domain	7/3483	16/22306	0.00698638	0.0932644	Zm00001d017392/Zm00001d019681/Zm00001d020158/Zm00001d026030/Zm00001d027790/Zm00001d036620/Zm00001d051291	-/-/-/-/-/-/-	7
BP	GO:0006900	vesicle budding from membrane	20/3483	73/22306	0.00703305	0.0932644	Zm00001d004639/Zm00001d004640/Zm00001d005902/Zm00001d007075/Zm00001d009452/Zm00001d013301/Zm00001d014188/Zm00001d014808/Zm00001d019287/Zm00001d022378/Zm00001d032334/Zm00001d032980/Zm00001d035889/Zm00001d037484/Zm00001d038892/Zm00001d045956/Zm00001d046194/Zm00001d048857/Zm00001d049155/Zm00001d054076	-/-/-/-/-/-/-/-/-/-/-/-/-/-/-/-/-/-/-/-	20
BP	GO:0035304	regulation of protein dephosphorylation	20/3483	73/22306	0.00703305	0.0932644	Zm00001d002272/Zm00001d011233/Zm00001d011282/Zm00001d012667/Zm00001d014037/Zm00001d017215/Zm00001d019263/Zm00001d026200/Zm00001d026331/Zm00001d030934/Zm00001d033370/Zm00001d034817/Zm00001d037626/Zm00001d039165/Zm00001d039252/Zm00001d042120/Zm00001d044313/Zm00001d044393/Zm00001d046214/Zm00001d053565	-/-/-/-/-/-/-/-/-/-/-/-/-/-/-/-/-/-/-/-	20
BP	GO:0043666	regulation of phosphoprotein phosphatase activity	20/3483	73/22306	0.00703305	0.0932644	Zm00001d002272/Zm00001d011233/Zm00001d011282/Zm00001d012667/Zm00001d014037/Zm00001d017215/Zm00001d019263/Zm00001d026200/Zm00001d026331/Zm00001d030934/Zm00001d033370/Zm00001d034817/Zm00001d037626/Zm00001d039165/Zm00001d039252/Zm00001d042120/Zm00001d044313/Zm00001d044393/Zm00001d046214/Zm00001d053565	-/-/-/-/-/-/-/-/-/-/-/-/-/-/-/-/-/-/-/-	20
BP	GO:0071806	protein transmembrane transport	33/3483	138/22306	0.0070342	0.0932644	Zm00001d000349/Zm00001d001882/Zm00001d002462/Zm00001d003502/Zm00001d003846/Zm00001d003913/Zm00001d004051/Zm00001d004119/Zm00001d005373/Zm00001d006214/Zm00001d006588/Zm00001d012930/Zm00001d014090/Zm00001d015473/Zm00001d017847/Zm00001d021301/Zm00001d025453/Zm00001d027699/Zm00001d028485/Zm00001d028971/Zm00001d032615/Zm00001d032773/Zm00001d033317/Zm00001d034358/Zm00001d034805/Zm00001d037422/Zm00001d0…	-/-/-/-/-/high chlorophyll fluorescence106/-/-/-/-/-/-/chaperonin 1/-/-/LON peptidase1/-/-/-/-/-/-/thylakoid assembly4/-/-/-/-/-/-/-/-/-/-	33
BP	GO:0006893	Golgi to plasma membrane transport	11/3483	32/22306	0.00705831	0.0932644	Zm00001d007760/Zm00001d011266/Zm00001d013049/Zm00001d019104/Zm00001d021828/Zm00001d022172/Zm00001d022502/Zm00001d025398/Zm00001d033303/Zm00001d041138/Zm00001d044367	-/-/-/-/-/-/-/-/roothair defective1/-/-	11
BP	GO:0030433	ubiquitin-dependent ERAD pathway	21/3483	78/22306	0.00723723	0.095049	Zm00001d000390/Zm00001d001962/Zm00001d010454/Zm00001d012643/Zm00001d014124/Zm00001d016142/Zm00001d017997/Zm00001d019287/Zm00001d021498/Zm00001d027707/Zm00001d029561/Zm00001d030620/Zm00001d033502/Zm00001d036765/Zm00001d044551/Zm00001d045049/Zm00001d045133/Zm00001d046539/Zm00001d046624/Zm00001d047306/Zm00001d052721	-/-/-/-/-/-/-/-/-/-/-/-/-/-/-/ubiquitin conjugating enzyme2/-/-/-/-/-	21
BP	GO:0005996	monosaccharide metabolic process	49/3483	223/22306	0.00732065	0.0955654	Zm00001d002377/Zm00001d005925/Zm00001d006221/Zm00001d006931/Zm00001d007383/Zm00001d008314/Zm00001d008613/Zm00001d011526/Zm00001d013428/Zm00001d017119/Zm00001d018902/Zm00001d020771/Zm00001d020835/Zm00001d021310/Zm00001d022206/Zm00001d022490/Zm00001d026311/Zm00001d028562/Zm00001d028653/Zm00001d028762/Zm00001d028825/Zm00001d029008/Zm00001d030282/Zm00001d031669/Zm00001d032090/Zm00001d032346/Zm00001d0…	-/-/triose phosphate isomerase2/-/-/-/-/-/phosphoglucomutase2/-/-/-/-/-/-/-/-/-/dTDP-glucose dehydratase homolog csu219/-/-/-/-/-/-/-/-/-/phosphoglucomutase1/-/-/-/-/-/-/-/-/-/fructokinase1/-/-/-/-/bZIP-transcription factor 105/-/-/-/-/-	49
BP	GO:0001934	positive regulation of protein phosphorylation	23/3483	88/22306	0.00749709	0.0961217	Zm00001d001978/Zm00001d005064/Zm00001d017392/Zm00001d017525/Zm00001d019681/Zm00001d020158/Zm00001d021584/Zm00001d023230/Zm00001d025449/Zm00001d026030/Zm00001d027790/Zm00001d028514/Zm00001d034055/Zm00001d035087/Zm00001d045359/Zm00001d045967/Zm00001d047728/Zm00001d048104/Zm00001d051291/Zm00001d051307/Zm00001d052147/Zm00001d052327/Zm00001d053741	-/-/-/-/-/-/-/-/-/-/-/MAP kinase kinase kinase11/-/acidic ribosomal protein P1a/-/-/-/-/-/autophagy13a/-/-/autophagy11a	23
BP	GO:0035459	cargo loading into vesicle	8/3483	20/22306	0.00755724	0.0961217	Zm00001d004639/Zm00001d004640/Zm00001d005902/Zm00001d007075/Zm00001d013301/Zm00001d019287/Zm00001d022378/Zm00001d049155	-/-/-/-/-/-/-/-	8
BP	GO:0040011	locomotion	8/3483	20/22306	0.00755724	0.0961217	Zm00001d013274/Zm00001d013421/Zm00001d018004/Zm00001d018535/Zm00001d023262/Zm00001d044802/Zm00001d049297/Zm00001d052273	-/-/Rho-related protein from plants 1/brick1/brick3/Rho-related protein from plants 5/-/Rho-related protein from plants 8	8
BP	GO:0090110	cargo loading into COPII-coated vesicle	8/3483	20/22306	0.00755724	0.0961217	Zm00001d004639/Zm00001d004640/Zm00001d005902/Zm00001d007075/Zm00001d013301/Zm00001d019287/Zm00001d022378/Zm00001d049155	-/-/-/-/-/-/-/-	8
BP	GO:0035194	posttranscriptional gene silencing by RNA	15/3483	50/22306	0.00762941	0.0961217	Zm00001d012824/Zm00001d014977/Zm00001d017962/Zm00001d018863/Zm00001d020011/Zm00001d022586/Zm00001d024018/Zm00001d025830/Zm00001d027412/Zm00001d029133/Zm00001d031908/Zm00001d037971/Zm00001d043861/Zm00001d044552/Zm00001d048432	-/brahma1/-/hua enhancer1/-/-/-/dicer-like4/dicer-like 101/-/-/FHA-transcription factor 15/-/-/-	15
BP	GO:0060341	regulation of cellular localization	15/3483	50/22306	0.00762941	0.0961217	Zm00001d004639/Zm00001d004640/Zm00001d005902/Zm00001d007943/Zm00001d013301/Zm00001d014913/Zm00001d018057/Zm00001d018657/Zm00001d020485/Zm00001d032575/Zm00001d034914/Zm00001d035889/Zm00001d048857/Zm00001d049155/Zm00001d054076	-/-/-/-/-/-/-/-/-/-/-/-/-/-/-	15
BP	GO:0045934	negative regulation of nucleobase-containing compound metabolic process	55/3483	257/22306	0.00822991	0.103088	Zm00001d002594/Zm00001d004383/Zm00001d006918/Zm00001d007407/Zm00001d007436/Zm00001d008233/Zm00001d008429/Zm00001d009520/Zm00001d011158/Zm00001d012052/Zm00001d012108/Zm00001d013278/Zm00001d013440/Zm00001d013887/Zm00001d014909/Zm00001d015765/Zm00001d016518/Zm00001d017962/Zm00001d018218/Zm00001d018890/Zm00001d019789/Zm00001d020182/Zm00001d021145/Zm00001d021467/Zm00001d022069/Zm00001d023706/Zm00001d0…	OVATE-transcription factor 7/leunig-related6/-/related to retinoblastoma1/CCAAT-HAP5-transcription factor 58/-/-/-/PHD-transcription factor 10/-/-/PHD-transcription factor 25/-/-/-/-/-/-/GNAT-transcription factor 26/-/-/histone acetyltransferase1/-/-/-/-/-/-/-/-/-/high chlorophyll fluorescence3/-/-/methyl binding domain119/retinoblastoma family3/-/PHD-transcription factor 15/-/-/enhancer of zeste…	55
BP	GO:0015931	nucleobase-containing compound transport	44/3483	198/22306	0.00866225	0.10788	Zm00001d000199/Zm00001d002190/Zm00001d002941/Zm00001d005006/Zm00001d005934/Zm00001d006679/Zm00001d007065/Zm00001d008259/Zm00001d008679/Zm00001d010023/Zm00001d010478/Zm00001d010500/Zm00001d011603/Zm00001d012030/Zm00001d012747/Zm00001d013334/Zm00001d014280/Zm00001d020011/Zm00001d021590/Zm00001d021993/Zm00001d022000/Zm00001d022125/Zm00001d022343/Zm00001d023368/Zm00001d025869/Zm00001d026263/Zm00001d0…	-/severe depolymerization of actin1/-/-/-/-/-/-/-/-/-/-/-/-/-/-/-/-/-/-/-/-/-/-/-/-/-/-/-/-/-/-/-/-/-/-/-/-/-/-/adenine nucleotide translocator2/-/-/-	44
BP	GO:0031667	response to nutrient levels	18/3483	65/22306	0.00911296	0.110815	Zm00001d001865/Zm00001d005064/Zm00001d007892/Zm00001d010315/Zm00001d013984/Zm00001d017966/Zm00001d018902/Zm00001d023230/Zm00001d024239/Zm00001d026335/Zm00001d028360/Zm00001d032659/Zm00001d033383/Zm00001d038156/Zm00001d038389/Zm00001d043239/Zm00001d048835/Zm00001d052327	cytokinin response regulator1/-/-/autophagy18h/-/-/-/-/autophagy8d/autophagy8b/DMAS1/-/hydroxymethylpyrimidine phosphate synthase1/autophagy18g/-/autophagy18f/-/-	18
BP	GO:0098876	vesicle-mediated transport to the plasma membrane	11/3483	33/22306	0.00912111	0.110815	Zm00001d007760/Zm00001d011266/Zm00001d013049/Zm00001d019104/Zm00001d021828/Zm00001d022172/Zm00001d022502/Zm00001d025398/Zm00001d033303/Zm00001d041138/Zm00001d044367	-/-/-/-/-/-/-/-/roothair defective1/-/-	11
BP	GO:0006491	N-glycan processing	6/3483	13/22306	0.00917649	0.110815	Zm00001d002388/Zm00001d008236/Zm00001d010454/Zm00001d026257/Zm00001d037272/Zm00001d044759	-/-/-/-/-/-	6
BP	GO:2000377	regulation of reactive oxygen species metabolic process	6/3483	13/22306	0.00917649	0.110815	Zm00001d005812/Zm00001d008648/Zm00001d022324/Zm00001d031938/Zm00001d045944/Zm00001d052101	-/-/-/-/-/chaperonin10	6
BP	GO:0016197	endosomal transport	19/3483	70/22306	0.00941631	0.110815	Zm00001d004396/Zm00001d006433/Zm00001d006939/Zm00001d012618/Zm00001d013059/Zm00001d013314/Zm00001d016049/Zm00001d023910/Zm00001d025044/Zm00001d025134/Zm00001d032710/Zm00001d033488/Zm00001d034492/Zm00001d042451/Zm00001d043112/Zm00001d043269/Zm00001d048239/Zm00001d048616/Zm00001d053371	-/-/-/-/-/vesicular transport protein1/-/-/-/-/-/-/-/-/-/-/-/-/-	19
BP	GO:0032535	regulation of cellular component size	19/3483	70/22306	0.00941631	0.110815	Zm00001d005064/Zm00001d005281/Zm00001d007806/Zm00001d014327/Zm00001d017106/Zm00001d018004/Zm00001d018484/Zm00001d018535/Zm00001d023230/Zm00001d023908/Zm00001d029343/Zm00001d035183/Zm00001d037497/Zm00001d037970/Zm00001d042097/Zm00001d044802/Zm00001d045323/Zm00001d052273/Zm00001d052327	-/-/-/-/-/Rho-related protein from plants 1/-/brick1/-/-/-/reaction to X. oryzae1/-/-/-/Rho-related protein from plants 5/double B-box zinc finger protein11/Rho-related protein from plants 8/-	19
BP	GO:0090066	regulation of anatomical structure size	19/3483	70/22306	0.00941631	0.110815	Zm00001d005064/Zm00001d005281/Zm00001d007806/Zm00001d014327/Zm00001d017106/Zm00001d018004/Zm00001d018484/Zm00001d018535/Zm00001d023230/Zm00001d023908/Zm00001d029343/Zm00001d035183/Zm00001d037497/Zm00001d037970/Zm00001d042097/Zm00001d044802/Zm00001d045323/Zm00001d052273/Zm00001d052327	-/-/-/-/-/Rho-related protein from plants 1/-/brick1/-/-/-/reaction to X. oryzae1/-/-/-/Rho-related protein from plants 5/double B-box zinc finger protein11/Rho-related protein from plants 8/-	19
BP	GO:1903047	mitotic cell cycle process	70/3483	342/22306	0.0094808	0.110815	Zm00001d002056/Zm00001d002154/Zm00001d002662/Zm00001d003151/Zm00001d004709/Zm00001d005250/Zm00001d005269/Zm00001d006499/Zm00001d007233/Zm00001d007407/Zm00001d007585/Zm00001d007943/Zm00001d009780/Zm00001d010656/Zm00001d012560/Zm00001d014124/Zm00001d018009/Zm00001d018057/Zm00001d018657/Zm00001d019343/Zm00001d019670/Zm00001d019789/Zm00001d021635/Zm00001d021731/Zm00001d022114/Zm00001d023279/Zm00001d0…	-/meiotic recombination protein 11 homolog A/cyclin8/-/-/cellulose synthase9/-/-/-/related to retinoblastoma1/-/-/gamma-tubulin1/cyclin1/cyclin7/-/-/-/-/GNAT-transcription factor 32/-/-/-/-/-/-/chitin synthase homolog1/-/-/-/-/-/dicer-like 101/-/-/roothairless6/retinoblastoma family3/-/-/-/-/-/-/cellulose synthase6/-/-/-/-/-/-/-/-/-/-/centromere protein C 1/-/-/-/origin recognition complex1/-/-/-…	70
BP	GO:0009084	glutamine family amino acid biosynthetic process	13/3483	42/22306	0.00951158	0.110815	Zm00001d017958/Zm00001d021956/Zm00001d022388/Zm00001d026501/Zm00001d028662/Zm00001d032815/Zm00001d033228/Zm00001d033328/Zm00001d038948/Zm00001d043845/Zm00001d044503/Zm00001d048574/Zm00001d051804	glutamine synthetase4/GNAT-transcription factor 33/ferredoxin-dependent glutamate synthase1/glutamine synthetase1/-/-/-/-/-/-/-/GNAT-transcription factor 39/glutamine synthetase5	13
BP	GO:0018198	peptidyl-cysteine modification	13/3483	42/22306	0.00951158	0.110815	Zm00001d002534/Zm00001d006102/Zm00001d015366/Zm00001d022038/Zm00001d026600/Zm00001d028619/Zm00001d038321/Zm00001d044647/Zm00001d047439/Zm00001d047805/Zm00001d049857/Zm00001d051421/Zm00001d051608	-/-/camouflage1/-/-/-/-/-/-/-/-/-/-	13
BP	GO:1901988	negative regulation of cell cycle phase transition	13/3483	42/22306	0.00951158	0.110815	Zm00001d002154/Zm00001d004709/Zm00001d007407/Zm00001d007585/Zm00001d018057/Zm00001d023279/Zm00001d031678/Zm00001d042639/Zm00001d042810/Zm00001d044630/Zm00001d045080/Zm00001d047873/Zm00001d052695	meiotic recombination protein 11 homolog A/-/related to retinoblastoma1/-/-/-/retinoblastoma family3/-/-/-/origin recognition complex1/-/-	13
BP	GO:1901991	negative regulation of mitotic cell cycle phase transition	13/3483	42/22306	0.00951158	0.110815	Zm00001d002154/Zm00001d004709/Zm00001d007407/Zm00001d007585/Zm00001d018057/Zm00001d023279/Zm00001d031678/Zm00001d042639/Zm00001d042810/Zm00001d044630/Zm00001d045080/Zm00001d047873/Zm00001d052695	meiotic recombination protein 11 homolog A/-/related to retinoblastoma1/-/-/-/retinoblastoma family3/-/-/-/origin recognition complex1/-/-	13
BP	GO:0010941	regulation of cell death	10/3483	29/22306	0.00979519	0.111541	Zm00001d010811/Zm00001d015703/Zm00001d015704/Zm00001d016615/Zm00001d017809/Zm00001d021498/Zm00001d021524/Zm00001d038097/Zm00001d051609/Zm00001d053286	-/-/-/-/-/-/-/-/-/-	10
BP	GO:0045324	late endosome to vacuole transport	10/3483	29/22306	0.00979519	0.111541	Zm00001d010470/Zm00001d012618/Zm00001d018382/Zm00001d032710/Zm00001d038106/Zm00001d041948/Zm00001d043112/Zm00001d043269/Zm00001d048616/Zm00001d052028	-/-/vacuolar protein sorting2/-/-/-/-/-/-/-	10
BP	GO:0071902	positive regulation of protein serine/threonine kinase activity	10/3483	29/22306	0.00979519	0.111541	Zm00001d005064/Zm00001d017392/Zm00001d019681/Zm00001d020158/Zm00001d023230/Zm00001d026030/Zm00001d027790/Zm00001d034055/Zm00001d051291/Zm00001d052327	-/-/-/-/-/-/-/-/-/-	10
BP	GO:0009100	glycoprotein metabolic process	48/3483	221/22306	0.00980557	0.111541	Zm00001d002388/Zm00001d002944/Zm00001d003878/Zm00001d005248/Zm00001d007383/Zm00001d007764/Zm00001d008236/Zm00001d009409/Zm00001d009520/Zm00001d010454/Zm00001d013052/Zm00001d014361/Zm00001d015249/Zm00001d016506/Zm00001d017085/Zm00001d017767/Zm00001d025989/Zm00001d026064/Zm00001d026257/Zm00001d027484/Zm00001d028152/Zm00001d028731/Zm00001d028980/Zm00001d030282/Zm00001d032267/Zm00001d032400/Zm00001d0…	-/-/-/-/-/-/-/-/-/-/-/-/-/-/-/-/Aux/IAA-transcription factor 43/-/-/-/-/-/-/-/-/-/-/-/-/-/-/-/-/-/-/-/-/-/-/-/-/-/-/-/-/-/-/-	48
BP	GO:0019220	regulation of phosphate metabolic process	62/3483	298/22306	0.00988273	0.111541	Zm00001d001978/Zm00001d002272/Zm00001d002662/Zm00001d002778/Zm00001d003401/Zm00001d005064/Zm00001d010656/Zm00001d011233/Zm00001d011282/Zm00001d012560/Zm00001d012667/Zm00001d013389/Zm00001d014037/Zm00001d017215/Zm00001d017392/Zm00001d017525/Zm00001d019263/Zm00001d019681/Zm00001d020158/Zm00001d021584/Zm00001d023230/Zm00001d024857/Zm00001d025449/Zm00001d026030/Zm00001d026200/Zm00001d026331/Zm00001d0…	-/-/cyclin8/CK2 regulatory subunit B1/general regulatory factor1/-/cyclin1/-/-/cyclin7/-/-/-/-/-/-/-/-/-/-/-/discordia1/-/-/-/-/cyclin-dependent kinase inhibitor3/-/MAP kinase kinase kinase11/-/-/-/-/-/acidic ribosomal protein P1a/-/-/-/-/-/-/-/-/-/-/-/-/-/-/-/-/-/-/-/autophagy13a/-/-/-/-/autophagy11a/-/-	62
BP	GO:0051174	regulation of phosphorus metabolic process	62/3483	298/22306	0.00988273	0.111541	Zm00001d001978/Zm00001d002272/Zm00001d002662/Zm00001d002778/Zm00001d003401/Zm00001d005064/Zm00001d010656/Zm00001d011233/Zm00001d011282/Zm00001d012560/Zm00001d012667/Zm00001d013389/Zm00001d014037/Zm00001d017215/Zm00001d017392/Zm00001d017525/Zm00001d019263/Zm00001d019681/Zm00001d020158/Zm00001d021584/Zm00001d023230/Zm00001d024857/Zm00001d025449/Zm00001d026030/Zm00001d026200/Zm00001d026331/Zm00001d0…	-/-/cyclin8/CK2 regulatory subunit B1/general regulatory factor1/-/cyclin1/-/-/cyclin7/-/-/-/-/-/-/-/-/-/-/-/discordia1/-/-/-/-/cyclin-dependent kinase inhibitor3/-/MAP kinase kinase kinase11/-/-/-/-/-/acidic ribosomal protein P1a/-/-/-/-/-/-/-/-/-/-/-/-/-/-/-/-/-/-/-/autophagy13a/-/-/-/-/autophagy11a/-/-	62
BP	GO:0022604	regulation of cell morphogenesis	9/3483	25/22306	0.0103217	0.115038	Zm00001d004639/Zm00001d004640/Zm00001d005902/Zm00001d008654/Zm00001d013301/Zm00001d018004/Zm00001d044802/Zm00001d049155/Zm00001d052273	-/-/-/-/-/Rho-related protein from plants 1/Rho-related protein from plants 5/-/Rho-related protein from plants 8	9
BP	GO:0016050	vesicle organization	35/3483	152/22306	0.0103451	0.115038	Zm00001d002148/Zm00001d004639/Zm00001d004640/Zm00001d005170/Zm00001d005902/Zm00001d006916/Zm00001d006939/Zm00001d007075/Zm00001d009452/Zm00001d013301/Zm00001d014188/Zm00001d014808/Zm00001d019091/Zm00001d019287/Zm00001d020485/Zm00001d022199/Zm00001d022378/Zm00001d024205/Zm00001d027808/Zm00001d031942/Zm00001d032334/Zm00001d032980/Zm00001d033488/Zm00001d034505/Zm00001d035889/Zm00001d037484/Zm00001d0…	-/-/-/-/-/-/-/-/-/-/-/-/-/-/-/-/-/-/-/-/-/-/-/-/-/-/-/-/-/-/-/-/-/-/-	35
BP	GO:0051253	negative regulation of RNA metabolic process	51/3483	238/22306	0.0103518	0.115038	Zm00001d002594/Zm00001d004383/Zm00001d006918/Zm00001d007407/Zm00001d007436/Zm00001d008233/Zm00001d008429/Zm00001d009520/Zm00001d011158/Zm00001d012052/Zm00001d012108/Zm00001d013278/Zm00001d013440/Zm00001d014909/Zm00001d015765/Zm00001d016518/Zm00001d017962/Zm00001d018218/Zm00001d018890/Zm00001d019789/Zm00001d020182/Zm00001d021145/Zm00001d021467/Zm00001d022069/Zm00001d023706/Zm00001d025048/Zm00001d0…	OVATE-transcription factor 7/leunig-related6/-/related to retinoblastoma1/CCAAT-HAP5-transcription factor 58/-/-/-/PHD-transcription factor 10/-/-/PHD-transcription factor 25/-/-/-/-/-/GNAT-transcription factor 26/-/-/histone acetyltransferase1/-/-/-/-/-/-/-/-/high chlorophyll fluorescence3/-/-/methyl binding domain119/retinoblastoma family3/-/PHD-transcription factor 15/-/-/enhancer of zeste1/PH…	51
BP	GO:0072598	protein localization to chloroplast	12/3483	38/22306	0.0105484	0.116192	Zm00001d003846/Zm00001d003913/Zm00001d006588/Zm00001d012861/Zm00001d012893/Zm00001d021126/Zm00001d025453/Zm00001d032615/Zm00001d033317/Zm00001d034823/Zm00001d039852/Zm00001d052700	-/high chlorophyll fluorescence106/-/-/-/-/-/-/thylakoid assembly4/-/-/-	12
BP	GO:0051668	localization within membrane	8/3483	21/22306	0.0105629	0.116192	Zm00001d004639/Zm00001d004640/Zm00001d005902/Zm00001d007075/Zm00001d013301/Zm00001d019287/Zm00001d022378/Zm00001d049155	-/-/-/-/-/-/-/-	8
BP	GO:0006541	glutamine metabolic process	15/3483	52/22306	0.0112029	0.122025	Zm00001d002003/Zm00001d003395/Zm00001d017790/Zm00001d017958/Zm00001d022388/Zm00001d026501/Zm00001d027876/Zm00001d028464/Zm00001d032815/Zm00001d036484/Zm00001d038948/Zm00001d041620/Zm00001d043845/Zm00001d051804/Zm00001d053981	-/anthranilate synthase homolog1/-/glutamine synthetase4/ferredoxin-dependent glutamate synthase1/glutamine synthetase1/-/-/-/-/-/-/-/glutamine synthetase5/small kernel2	15
BP	GO:0050684	regulation of mRNA processing	20/3483	76/22306	0.0112102	0.122025	Zm00001d006906/Zm00001d010901/Zm00001d014812/Zm00001d015194/Zm00001d022243/Zm00001d025673/Zm00001d029256/Zm00001d031269/Zm00001d035551/Zm00001d037925/Zm00001d038570/Zm00001d039417/Zm00001d042040/Zm00001d047498/Zm00001d047847/Zm00001d048609/Zm00001d050245/Zm00001d051052/Zm00001d052888/Zm00001d053613	-/-/-/-/-/-/-/-/-/-/-/-/-/-/-/-/-/-/-/-	20
BP	GO:0009064	glutamine family amino acid metabolic process	25/3483	101/22306	0.0112621	0.122025	Zm00001d002003/Zm00001d002358/Zm00001d003395/Zm00001d017790/Zm00001d017958/Zm00001d021956/Zm00001d022388/Zm00001d026501/Zm00001d027876/Zm00001d028464/Zm00001d028662/Zm00001d031749/Zm00001d032815/Zm00001d033228/Zm00001d033328/Zm00001d036484/Zm00001d038841/Zm00001d038948/Zm00001d041620/Zm00001d043845/Zm00001d044503/Zm00001d047124/Zm00001d048574/Zm00001d051804/Zm00001d053981	-/necrotic4/anthranilate synthase homolog1/-/glutamine synthetase4/GNAT-transcription factor 33/ferredoxin-dependent glutamate synthase1/glutamine synthetase1/-/-/-/-/-/-/-/-/putative aldehyde dehydrogenase MIS1/-/-/-/-/-/GNAT-transcription factor 39/glutamine synthetase5/small kernel2	25
BP	GO:0018209	peptidyl-serine modification	41/3483	185/22306	0.0114766	0.12373	Zm00001d002418/Zm00001d002540/Zm00001d003198/Zm00001d004812/Zm00001d007889/Zm00001d008357/Zm00001d008863/Zm00001d009055/Zm00001d010578/Zm00001d010720/Zm00001d011696/Zm00001d012761/Zm00001d013405/Zm00001d013435/Zm00001d013439/Zm00001d013589/Zm00001d014773/Zm00001d015100/Zm00001d017754/Zm00001d025853/Zm00001d026246/Zm00001d026391/Zm00001d031040/Zm00001d031231/Zm00001d032473/Zm00001d033982/Zm00001d0…	-/calcium dependent protein kinase5/-/calcium dependent protein kinase11/-/-/-/-/-/-/-/-/-/-/-/-/calcium dependent protein kinase1/-/-/-/-/GNAT-transcription factor 43/-/-/-/-/CK2 protein kinase alpha 2/-/-/-/-/-/-/-/-/-/-/-/calcium/calmodulin dependent protein kinase1/-/-	41
BP	GO:0006610	ribosomal protein import into nucleus	5/3483	10/22306	0.0117089	0.124378	Zm00001d021893/Zm00001d030694/Zm00001d033632/Zm00001d038021/Zm00001d041556	-/-/-/-/-	5
BP	GO:0032465	regulation of cytokinesis	5/3483	10/22306	0.0117089	0.124378	Zm00001d005269/Zm00001d023760/Zm00001d024953/Zm00001d034082/Zm00001d034166	-/chitin synthase homolog1/-/-/-	5
BP	GO:0032988	ribonucleoprotein complex disassembly	5/3483	10/22306	0.0117089	0.124378	Zm00001d001983/Zm00001d002822/Zm00001d015893/Zm00001d025948/Zm00001d031581	-/-/-/-/-	5
BP	GO:0040007	growth	28/3483	117/22306	0.0121821	0.128773	Zm00001d005064/Zm00001d005281/Zm00001d007158/Zm00001d007208/Zm00001d008743/Zm00001d010974/Zm00001d012212/Zm00001d014297/Zm00001d019881/Zm00001d021641/Zm00001d023230/Zm00001d023262/Zm00001d023908/Zm00001d025715/Zm00001d028818/Zm00001d030266/Zm00001d032099/Zm00001d033597/Zm00001d034049/Zm00001d035030/Zm00001d038475/Zm00001d043948/Zm00001d044273/Zm00001d045944/Zm00001d046485/Zm00001d046973/Zm00001d0…	-/-/-/-/-/PHD-transcription factor 17/gibberellin 20-oxidase5/histidine kinase3/-/-/-/brick3/-/-/defective kernel1/-/-/-/-/-/ribosome export associated1/-/-/-/-/-/minichromosome maintenance7/-	28
BP	GO:0006892	post-Golgi vesicle-mediated transport	18/3483	67/22306	0.0125981	0.132081	Zm00001d004396/Zm00001d005062/Zm00001d006939/Zm00001d007760/Zm00001d011266/Zm00001d013049/Zm00001d014303/Zm00001d019104/Zm00001d021828/Zm00001d022172/Zm00001d022502/Zm00001d025044/Zm00001d025398/Zm00001d033303/Zm00001d033488/Zm00001d035093/Zm00001d041138/Zm00001d044367	-/-/-/-/-/-/-/-/-/-/-/-/-/roothair defective1/-/-/-/-	18
BP	GO:0051604	protein maturation	35/3483	154/22306	0.0126472	0.132081	Zm00001d002456/Zm00001d002824/Zm00001d003462/Zm00001d003539/Zm00001d006107/Zm00001d006214/Zm00001d010522/Zm00001d013195/Zm00001d013642/Zm00001d013747/Zm00001d014516/Zm00001d016002/Zm00001d016036/Zm00001d018218/Zm00001d020602/Zm00001d021301/Zm00001d021401/Zm00001d023374/Zm00001d026212/Zm00001d026391/Zm00001d027672/Zm00001d030944/Zm00001d031115/Zm00001d031933/Zm00001d032183/Zm00001d038006/Zm00001d0…	-/-/LIP1/-/pyruvate dehydrogenase3/-/-/-/-/-/-/-/-/GNAT-transcription factor 26/-/LON peptidase1/-/-/-/GNAT-transcription factor 43/-/-/-/-/-/-/-/-/-/LIP1P-2/-/-/-/-/-	35
BP	GO:0032386	regulation of intracellular transport	10/3483	30/22306	0.0126778	0.132081	Zm00001d004639/Zm00001d004640/Zm00001d005902/Zm00001d013301/Zm00001d018057/Zm00001d034914/Zm00001d035889/Zm00001d048857/Zm00001d049155/Zm00001d054076	-/-/-/-/-/-/-/-/-/-	10
BP	GO:0035303	regulation of dephosphorylation	21/3483	82/22306	0.0130437	0.135242	Zm00001d002272/Zm00001d011233/Zm00001d011282/Zm00001d012667/Zm00001d014037/Zm00001d017215/Zm00001d019263/Zm00001d024857/Zm00001d026200/Zm00001d026331/Zm00001d030934/Zm00001d033370/Zm00001d034817/Zm00001d037626/Zm00001d039165/Zm00001d039252/Zm00001d042120/Zm00001d044313/Zm00001d044393/Zm00001d046214/Zm00001d053565	-/-/-/-/-/-/-/discordia1/-/-/-/-/-/-/-/-/-/-/-/-/-	21
BP	GO:0006739	NADP metabolic process	12/3483	39/22306	0.0131192	0.135378	Zm00001d003083/Zm00001d005144/Zm00001d006185/Zm00001d011835/Zm00001d017119/Zm00001d021770/Zm00001d030701/Zm00001d042052/Zm00001d045394/Zm00001d047587/Zm00001d048324/Zm00001d053076	-/-/-/-/-/-/-/-/-/bZIP-transcription factor 105/-/-	12
BP	GO:0006997	nucleus organization	15/3483	53/22306	0.0134229	0.137855	Zm00001d002012/Zm00001d012824/Zm00001d015450/Zm00001d019287/Zm00001d020929/Zm00001d027257/Zm00001d027834/Zm00001d028238/Zm00001d028262/Zm00001d038973/Zm00001d040116/Zm00001d041064/Zm00001d043335/Zm00001d048047/Zm00001d048238	-/-/SUN domain protein1/-/-/-/-/-/-/-/-/-/-/-/-	15
BP	GO:0006862	nucleotide transport	9/3483	26/22306	0.0136413	0.139437	Zm00001d000199/Zm00001d010023/Zm00001d010478/Zm00001d013334/Zm00001d023368/Zm00001d038850/Zm00001d046509/Zm00001d051685/Zm00001d053640	-/-/-/-/-/-/-/adenine nucleotide translocator2/-	9
BP	GO:0009615	response to virus	6/3483	14/22306	0.0139646	0.142071	Zm00001d022205/Zm00001d025830/Zm00001d027412/Zm00001d043194/Zm00001d045944/Zm00001d049297	-/dicer-like4/dicer-like 101/-/-/-	6
BP	GO:0016485	protein processing	26/3483	108/22306	0.0141856	0.143484	Zm00001d002824/Zm00001d003539/Zm00001d006107/Zm00001d006214/Zm00001d010522/Zm00001d013195/Zm00001d013642/Zm00001d013747/Zm00001d014516/Zm00001d016002/Zm00001d016036/Zm00001d020602/Zm00001d021301/Zm00001d021401/Zm00001d023374/Zm00001d027672/Zm00001d031115/Zm00001d031933/Zm00001d032183/Zm00001d038776/Zm00001d040221/Zm00001d040442/Zm00001d048102/Zm00001d051405/Zm00001d051740/Zm00001d052758	-/-/pyruvate dehydrogenase3/-/-/-/-/-/-/-/-/-/LON peptidase1/-/-/-/-/-/-/-/-/-/-/-/-/-	26
BP	GO:0042594	response to starvation	13/3483	44/22306	0.0143207	0.143484	Zm00001d001865/Zm00001d005064/Zm00001d010315/Zm00001d018902/Zm00001d023230/Zm00001d024239/Zm00001d026335/Zm00001d028360/Zm00001d038156/Zm00001d038389/Zm00001d043239/Zm00001d048835/Zm00001d052327	cytokinin response regulator1/-/autophagy18h/-/-/autophagy8d/autophagy8b/DMAS1/autophagy18g/-/autophagy18f/-/-	13
BP	GO:0048207	vesicle targeting, rough ER to cis-Golgi	8/3483	22/22306	0.0143683	0.143484	Zm00001d004639/Zm00001d004640/Zm00001d005902/Zm00001d013301/Zm00001d035889/Zm00001d048857/Zm00001d049155/Zm00001d054076	-/-/-/-/-/-/-/-	8
BP	GO:0048208	COPII vesicle coating	8/3483	22/22306	0.0143683	0.143484	Zm00001d004639/Zm00001d004640/Zm00001d005902/Zm00001d013301/Zm00001d035889/Zm00001d048857/Zm00001d049155/Zm00001d054076	-/-/-/-/-/-/-/-	8
BP	GO:0090114	COPII-coated vesicle budding	11/3483	35/22306	0.0146069	0.14462	Zm00001d004639/Zm00001d004640/Zm00001d005902/Zm00001d007075/Zm00001d013301/Zm00001d019287/Zm00001d022378/Zm00001d035889/Zm00001d048857/Zm00001d049155/Zm00001d054076	-/-/-/-/-/-/-/-/-/-/-	11
BP	GO:0060628	regulation of ER to Golgi vesicle-mediated transport	7/3483	18/22306	0.0146155	0.14462	Zm00001d004639/Zm00001d004640/Zm00001d005902/Zm00001d013301/Zm00001d018057/Zm00001d048857/Zm00001d049155	-/-/-/-/-/-/-	7
BP	GO:0009991	response to extracellular stimulus	19/3483	73/22306	0.0148719	0.146015	Zm00001d001865/Zm00001d005064/Zm00001d007892/Zm00001d010315/Zm00001d010974/Zm00001d013984/Zm00001d017966/Zm00001d018902/Zm00001d023230/Zm00001d024239/Zm00001d026335/Zm00001d028360/Zm00001d032659/Zm00001d033383/Zm00001d038156/Zm00001d038389/Zm00001d043239/Zm00001d048835/Zm00001d052327	cytokinin response regulator1/-/-/autophagy18h/PHD-transcription factor 17/-/-/-/-/autophagy8d/autophagy8b/DMAS1/-/hydroxymethylpyrimidine phosphate synthase1/autophagy18g/-/autophagy18f/-/-	19
BP	GO:0010921	regulation of phosphatase activity	20/3483	78/22306	0.0149546	0.146015	Zm00001d002272/Zm00001d011233/Zm00001d011282/Zm00001d012667/Zm00001d014037/Zm00001d017215/Zm00001d019263/Zm00001d026200/Zm00001d026331/Zm00001d030934/Zm00001d033370/Zm00001d034817/Zm00001d037626/Zm00001d039165/Zm00001d039252/Zm00001d042120/Zm00001d044313/Zm00001d044393/Zm00001d046214/Zm00001d053565	-/-/-/-/-/-/-/-/-/-/-/-/-/-/-/-/-/-/-/-	20
BP	GO:0015748	organophosphate ester transport	21/3483	83/22306	0.0149586	0.146015	Zm00001d000199/Zm00001d010023/Zm00001d010478/Zm00001d013334/Zm00001d014188/Zm00001d021972/Zm00001d023368/Zm00001d025153/Zm00001d032334/Zm00001d032980/Zm00001d036233/Zm00001d038850/Zm00001d040456/Zm00001d042213/Zm00001d045956/Zm00001d046194/Zm00001d046509/Zm00001d047527/Zm00001d051661/Zm00001d051685/Zm00001d053640	-/-/-/-/-/-/-/-/-/-/-/-/-/thiamine diphosphate carrier protein2/-/-/-/-/-/adenine nucleotide translocator2/-	21
BP	GO:0010948	negative regulation of cell cycle process	14/3483	49/22306	0.0152588	0.146362	Zm00001d002154/Zm00001d004709/Zm00001d007407/Zm00001d007585/Zm00001d018057/Zm00001d023279/Zm00001d024953/Zm00001d031678/Zm00001d042639/Zm00001d042810/Zm00001d044630/Zm00001d045080/Zm00001d047873/Zm00001d052695	meiotic recombination protein 11 homolog A/-/related to retinoblastoma1/-/-/-/-/retinoblastoma family3/-/-/-/origin recognition complex1/-/-	14
BP	GO:0031334	positive regulation of protein complex assembly	14/3483	49/22306	0.0152588	0.146362	Zm00001d007806/Zm00001d011680/Zm00001d015886/Zm00001d016439/Zm00001d017106/Zm00001d018004/Zm00001d018484/Zm00001d033414/Zm00001d035183/Zm00001d044802/Zm00001d046539/Zm00001d050616/Zm00001d052273/Zm00001d053616	-/p15 (PC4 Sub1)-transcription factor 3/-/-/-/Rho-related protein from plants 1/-/-/reaction to X. oryzae1/Rho-related protein from plants 5/-/-/Rho-related protein from plants 8/-	14
BP	GO:0044089	positive regulation of cellular component biogenesis	14/3483	49/22306	0.0152588	0.146362	Zm00001d007806/Zm00001d011680/Zm00001d015886/Zm00001d016439/Zm00001d017106/Zm00001d018004/Zm00001d018484/Zm00001d033414/Zm00001d035183/Zm00001d044802/Zm00001d046539/Zm00001d050616/Zm00001d052273/Zm00001d053616	-/p15 (PC4 Sub1)-transcription factor 3/-/-/-/Rho-related protein from plants 1/-/-/reaction to X. oryzae1/Rho-related protein from plants 5/-/-/Rho-related protein from plants 8/-	14
BP	GO:0010154	fruit development	32/3483	140/22306	0.0152643	0.146362	Zm00001d005281/Zm00001d007905/Zm00001d008743/Zm00001d013421/Zm00001d013891/Zm00001d015837/Zm00001d017427/Zm00001d017742/Zm00001d017982/Zm00001d021871/Zm00001d022502/Zm00001d027412/Zm00001d028370/Zm00001d028818/Zm00001d031494/Zm00001d034962/Zm00001d036629/Zm00001d037001/Zm00001d037110/Zm00001d037832/Zm00001d038728/Zm00001d039693/Zm00001d040724/Zm00001d042720/Zm00001d045014/Zm00001d046973/Zm00001d0…	-/-/-/-/-/-/-/GRF-transcription factor 6/-/-/-/dicer-like 101/-/defective kernel1/-/embryo specific2/-/-/-/-/trehalose-6-phosphate synthase12/-/-/-/chloroplast RNA splicing3/-/-/minichromosome maintenance7/-/-/-/-	32
BP	GO:0018105	peptidyl-serine phosphorylation	40/3483	183/22306	0.0155123	0.147435	Zm00001d002418/Zm00001d002540/Zm00001d003198/Zm00001d004812/Zm00001d007889/Zm00001d008357/Zm00001d008863/Zm00001d009055/Zm00001d010578/Zm00001d010720/Zm00001d011696/Zm00001d012761/Zm00001d013405/Zm00001d013435/Zm00001d013439/Zm00001d013589/Zm00001d014773/Zm00001d015100/Zm00001d017754/Zm00001d025853/Zm00001d026246/Zm00001d031040/Zm00001d031231/Zm00001d032473/Zm00001d033982/Zm00001d034125/Zm00001d0…	-/calcium dependent protein kinase5/-/calcium dependent protein kinase11/-/-/-/-/-/-/-/-/-/-/-/-/calcium dependent protein kinase1/-/-/-/-/-/-/-/-/CK2 protein kinase alpha 2/-/-/-/-/-/-/-/-/-/-/-/calcium/calmodulin dependent protein kinase1/-/-	40
BP	GO:0034248	regulation of cellular amide metabolic process	40/3483	183/22306	0.0155123	0.147435	Zm00001d000213/Zm00001d003198/Zm00001d003611/Zm00001d004568/Zm00001d004573/Zm00001d004979/Zm00001d007940/Zm00001d012824/Zm00001d013653/Zm00001d013673/Zm00001d014246/Zm00001d014977/Zm00001d017574/Zm00001d017882/Zm00001d021668/Zm00001d021716/Zm00001d021815/Zm00001d022042/Zm00001d027278/Zm00001d027412/Zm00001d027633/Zm00001d028901/Zm00001d029133/Zm00001d031908/Zm00001d032163/Zm00001d032875/Zm00001d0…	-/-/-/-/-/-/-/-/-/-/-/brahma1/-/-/translation initiation factor1/chloroplast RNA processing1/elongation initiation factor2/eukaryotic translation initiation factor 5A/-/dicer-like 101/-/high chlorophyll fluorescence3/-/-/-/-/-/-/-/-/-/FHA-transcription factor 15/eucaryotic initiation factor6/-/-/-/-/-/-/-	40
BP	GO:0007623	circadian rhythm	12/3483	40/22306	0.0161418	0.150237	Zm00001d007445/Zm00001d009330/Zm00001d015290/Zm00001d018796/Zm00001d024365/Zm00001d027309/Zm00001d027511/Zm00001d032353/Zm00001d038678/Zm00001d038894/Zm00001d040959/Zm00001d045944	-/-/-/-/-/-/catalase2/blue-light receptor phototropin 2/-/-/-/-	12
BP	GO:0048511	rhythmic process	12/3483	40/22306	0.0161418	0.150237	Zm00001d007445/Zm00001d009330/Zm00001d015290/Zm00001d018796/Zm00001d024365/Zm00001d027309/Zm00001d027511/Zm00001d032353/Zm00001d038678/Zm00001d038894/Zm00001d040959/Zm00001d045944	-/-/-/-/-/-/catalase2/blue-light receptor phototropin 2/-/-/-/-	12
BP	GO:0009668	plastid membrane organization	10/3483	31/22306	0.0161537	0.150237	Zm00001d006588/Zm00001d009723/Zm00001d012861/Zm00001d013195/Zm00001d016036/Zm00001d034823/Zm00001d038097/Zm00001d039852/Zm00001d046971/Zm00001d048717	-/plastid transcriptionally active14/-/-/-/-/-/-/-/-	10
BP	GO:0010027	thylakoid membrane organization	10/3483	31/22306	0.0161537	0.150237	Zm00001d006588/Zm00001d009723/Zm00001d012861/Zm00001d013195/Zm00001d016036/Zm00001d034823/Zm00001d038097/Zm00001d039852/Zm00001d046971/Zm00001d048717	-/plastid transcriptionally active14/-/-/-/-/-/-/-/-	10
BP	GO:0090151	establishment of protein localization to mitochondrial membrane	10/3483	31/22306	0.0161537	0.150237	Zm00001d003846/Zm00001d004051/Zm00001d012017/Zm00001d012930/Zm00001d015837/Zm00001d017847/Zm00001d023220/Zm00001d027699/Zm00001d042329/Zm00001d053664	-/-/-/-/-/-/-/-/-/-	10
BP	GO:0040029	regulation of gene expression, epigenetic	29/3483	125/22306	0.01659	0.153635	Zm00001d012824/Zm00001d013440/Zm00001d014977/Zm00001d016518/Zm00001d017962/Zm00001d017982/Zm00001d018218/Zm00001d018863/Zm00001d019789/Zm00001d020011/Zm00001d020182/Zm00001d021145/Zm00001d022586/Zm00001d024018/Zm00001d025830/Zm00001d027412/Zm00001d029133/Zm00001d031908/Zm00001d034434/Zm00001d036296/Zm00001d037346/Zm00001d037971/Zm00001d041592/Zm00001d043861/Zm00001d044552/Zm00001d045635/Zm00001d0…	-/-/brahma1/-/-/-/GNAT-transcription factor 26/hua enhancer1/-/-/histone acetyltransferase1/-/-/-/dicer-like4/dicer-like 101/-/-/-/enhancer of zeste1/splayed ATPase1/FHA-transcription factor 15/-/-/-/-/-/-/-	29
BP	GO:0006081	cellular aldehyde metabolic process	21/3483	84/22306	0.0170885	0.157577	Zm00001d000116/Zm00001d001881/Zm00001d006185/Zm00001d006221/Zm00001d007936/Zm00001d015477/Zm00001d015975/Zm00001d017119/Zm00001d017139/Zm00001d018468/Zm00001d021310/Zm00001d027352/Zm00001d029036/Zm00001d030701/Zm00001d039363/Zm00001d041407/Zm00001d046135/Zm00001d047587/Zm00001d048324/Zm00001d053776/Zm00001d053981	-/-/-/triose phosphate isomerase2/-/-/-/-/hydroxymethylbutenyl diphosphate synthase1/formaldehyde dehydrogenase homolog1/-/-/-/-/-/-/-/bZIP-transcription factor 105/-/-/small kernel2	21
BP	GO:0006417	regulation of translation	39/3483	179/22306	0.0175413	0.161068	Zm00001d000213/Zm00001d003198/Zm00001d003611/Zm00001d004568/Zm00001d004573/Zm00001d004979/Zm00001d007940/Zm00001d012824/Zm00001d013653/Zm00001d013673/Zm00001d014246/Zm00001d014977/Zm00001d017882/Zm00001d021668/Zm00001d021716/Zm00001d021815/Zm00001d022042/Zm00001d027278/Zm00001d027412/Zm00001d027633/Zm00001d028901/Zm00001d029133/Zm00001d031908/Zm00001d032163/Zm00001d032875/Zm00001d033046/Zm00001d0…	-/-/-/-/-/-/-/-/-/-/-/brahma1/-/translation initiation factor1/chloroplast RNA processing1/elongation initiation factor2/eukaryotic translation initiation factor 5A/-/dicer-like 101/-/high chlorophyll fluorescence3/-/-/-/-/-/-/-/-/-/FHA-transcription factor 15/eucaryotic initiation factor6/-/-/-/-/-/-/-	39
BP	GO:0043067	regulation of programmed cell death	9/3483	27/22306	0.0176886	0.161735	Zm00001d010811/Zm00001d015703/Zm00001d015704/Zm00001d017809/Zm00001d021498/Zm00001d021524/Zm00001d038097/Zm00001d051609/Zm00001d053286	-/-/-/-/-/-/-/-/-	9
BP	GO:0007264	small GTPase mediated signal transduction	25/3483	105/22306	0.0182388	0.166065	Zm00001d006433/Zm00001d006509/Zm00001d006607/Zm00001d010251/Zm00001d011717/Zm00001d014278/Zm00001d017456/Zm00001d017859/Zm00001d018004/Zm00001d021806/Zm00001d024612/Zm00001d029004/Zm00001d034590/Zm00001d037004/Zm00001d037377/Zm00001d038200/Zm00001d038709/Zm00001d040408/Zm00001d044802/Zm00001d046313/Zm00001d046717/Zm00001d047540/Zm00001d050915/Zm00001d051687/Zm00001d052273	-/-/-/-/-/-/ypt homolog4/-/Rho-related protein from plants 1/-/-/-/-/-/-/-/-/-/Rho-related protein from plants 5/-/-/-/ypt homolog3/-/Rho-related protein from plants 8	25
BP	GO:0006621	protein retention in ER lumen	5/3483	11/22306	0.0187389	0.169905	Zm00001d004655/Zm00001d021306/Zm00001d036443/Zm00001d038754/Zm00001d040178	-/-/-/-/-	5
BP	GO:0007005	mitochondrion organization	49/3483	235/22306	0.0191816	0.172651	Zm00001d000178/Zm00001d003846/Zm00001d004051/Zm00001d005373/Zm00001d006107/Zm00001d009504/Zm00001d009792/Zm00001d010522/Zm00001d011750/Zm00001d011877/Zm00001d012017/Zm00001d012027/Zm00001d012930/Zm00001d013531/Zm00001d014090/Zm00001d014516/Zm00001d015837/Zm00001d017847/Zm00001d017848/Zm00001d017979/Zm00001d021301/Zm00001d023220/Zm00001d027672/Zm00001d027699/Zm00001d027751/Zm00001d028485/Zm00001d0…	autophagy3/-/-/-/pyruvate dehydrogenase3/-/-/-/-/-/-/-/-/-/chaperonin 1/-/-/-/-/-/LON peptidase1/-/-/-/-/-/-/-/-/-/-/-/-/-/-/-/-/-/-/-/-/-/autophagy13a/-/-/-/-/autophagy11a/-	49
BP	GO:0034976	response to endoplasmic reticulum stress	31/3483	137/22306	0.0192011	0.172651	Zm00001d000390/Zm00001d001962/Zm00001d002856/Zm00001d003654/Zm00001d006350/Zm00001d007042/Zm00001d010454/Zm00001d012170/Zm00001d012643/Zm00001d014124/Zm00001d014912/Zm00001d016142/Zm00001d017997/Zm00001d019287/Zm00001d021347/Zm00001d021498/Zm00001d027707/Zm00001d028152/Zm00001d028726/Zm00001d029561/Zm00001d030620/Zm00001d033502/Zm00001d035574/Zm00001d036765/Zm00001d044551/Zm00001d045049/Zm00001d0…	-/-/-/protein disulfide isomerase10/-/bZIP-transcription factor 91/-/-/-/-/protein disulfide isomerase4/-/-/-/-/-/-/-/protein disulfide isomerase9/-/-/-/-/-/-/ubiquitin conjugating enzyme2/-/-/-/-/-	31
BP	GO:0016558	protein import into peroxisome matrix	7/3483	19/22306	0.020083	0.176563	Zm00001d002462/Zm00001d006214/Zm00001d021301/Zm00001d032773/Zm00001d034358/Zm00001d039111/Zm00001d052851	-/-/LON peptidase1/-/-/-/-	7
BP	GO:0043967	histone H4 acetylation	7/3483	19/22306	0.020083	0.176563	Zm00001d010497/Zm00001d015765/Zm00001d018218/Zm00001d020182/Zm00001d024953/Zm00001d027326/Zm00001d034434	-/-/GNAT-transcription factor 26/histone acetyltransferase1/-/actin related protein like4/-	7
BP	GO:0046184	aldehyde biosynthetic process	7/3483	19/22306	0.020083	0.176563	Zm00001d006221/Zm00001d007936/Zm00001d015477/Zm00001d021310/Zm00001d027352/Zm00001d041407/Zm00001d053981	triose phosphate isomerase2/-/-/-/-/-/small kernel2	7
BP	GO:0050000	chromosome localization	7/3483	19/22306	0.020083	0.176563	Zm00001d002056/Zm00001d007065/Zm00001d023839/Zm00001d024953/Zm00001d042639/Zm00001d044220/Zm00001d045354	-/-/-/-/-/centromere protein C 1/-	7
BP	GO:0098739	import across plasma membrane	7/3483	19/22306	0.020083	0.176563	Zm00001d012307/Zm00001d020892/Zm00001d021844/Zm00001d022504/Zm00001d028330/Zm00001d030868/Zm00001d037970	-/-/-/-/-/-/-	7
BP	GO:0035196	production of miRNAs involved in gene silencing by miRNA	6/3483	15/22306	0.020251	0.176563	Zm00001d012824/Zm00001d014977/Zm00001d027412/Zm00001d029133/Zm00001d037971/Zm00001d043861	-/brahma1/dicer-like 101/-/FHA-transcription factor 15/-	6
BP	GO:1901409	positive regulation of phosphorylation of RNA polymerase II C-terminal domain	6/3483	15/22306	0.020251	0.176563	Zm00001d017392/Zm00001d019681/Zm00001d020158/Zm00001d026030/Zm00001d027790/Zm00001d051291	-/-/-/-/-/-	6
BP	GO:0006903	vesicle targeting	10/3483	32/22306	0.020288	0.176563	Zm00001d004639/Zm00001d004640/Zm00001d005902/Zm00001d013301/Zm00001d020485/Zm00001d022502/Zm00001d035889/Zm00001d048857/Zm00001d049155/Zm00001d054076	-/-/-/-/-/-/-/-/-/-	10
BP	GO:0001510	RNA methylation	24/3483	101/22306	0.0208874	0.181052	Zm00001d005972/Zm00001d009597/Zm00001d012794/Zm00001d013533/Zm00001d015086/Zm00001d015194/Zm00001d017469/Zm00001d017887/Zm00001d017897/Zm00001d018070/Zm00001d018863/Zm00001d021624/Zm00001d022045/Zm00001d024463/Zm00001d024928/Zm00001d028098/Zm00001d028596/Zm00001d028597/Zm00001d029429/Zm00001d037264/Zm00001d039047/Zm00001d051885/Zm00001d053927/Zm00001d053963	-/-/-/-/-/-/-/-/-/-/hua enhancer1/-/-/-/-/-/-/-/-/-/-/-/-/-	24
BP	GO:0071407	cellular response to organic cyclic compound	23/3483	96/22306	0.0213179	0.184047	Zm00001d012824/Zm00001d013680/Zm00001d014705/Zm00001d014977/Zm00001d017139/Zm00001d017962/Zm00001d018369/Zm00001d018863/Zm00001d020011/Zm00001d025830/Zm00001d027412/Zm00001d027523/Zm00001d029133/Zm00001d030021/Zm00001d033217/Zm00001d037110/Zm00001d037971/Zm00001d039439/Zm00001d041307/Zm00001d042661/Zm00001d043861/Zm00001d048345/Zm00001d052423	-/-/C3H-transcription factor 329/brahma1/hydroxymethylbutenyl diphosphate synthase1/-/-/hua enhancer1/-/dicer-like4/dicer-like 101/-/-/-/-/-/FHA-transcription factor 15/BZR-transcription factor 2/-/-/-/-/-	23
BP	GO:0044743	protein transmembrane import into intracellular organelle	22/3483	91/22306	0.0217102	0.18669	Zm00001d002462/Zm00001d003846/Zm00001d003913/Zm00001d004051/Zm00001d005373/Zm00001d006214/Zm00001d006588/Zm00001d012930/Zm00001d014090/Zm00001d017847/Zm00001d021301/Zm00001d027699/Zm00001d028485/Zm00001d028971/Zm00001d032773/Zm00001d033317/Zm00001d034358/Zm00001d039111/Zm00001d048506/Zm00001d050123/Zm00001d052851/Zm00001d054089	-/-/high chlorophyll fluorescence106/-/-/-/-/-/chaperonin 1/-/LON peptidase1/-/-/-/-/thylakoid assembly4/-/-/-/-/-/-	22
BP	GO:0045489	pectin biosynthetic process	9/3483	28/22306	0.0225432	0.193087	Zm00001d002149/Zm00001d005981/Zm00001d006210/Zm00001d007184/Zm00001d007571/Zm00001d028188/Zm00001d033556/Zm00001d038076/Zm00001d044828	-/-/-/-/-/-/-/-/-	9
BP	GO:0045292	mRNA cis splicing, via spliceosome	17/3483	66/22306	0.0226423	0.193172	Zm00001d006906/Zm00001d007770/Zm00001d011652/Zm00001d017751/Zm00001d022243/Zm00001d028034/Zm00001d029133/Zm00001d029256/Zm00001d031269/Zm00001d035551/Zm00001d037925/Zm00001d043745/Zm00001d044573/Zm00001d047498/Zm00001d048609/Zm00001d051052/Zm00001d053613	-/-/-/organelle transcript processing51/-/-/-/-/-/-/-/-/-/-/-/-/-	17
BP	GO:0006403	RNA localization	25/3483	107/22306	0.0228159	0.19389	Zm00001d002190/Zm00001d007065/Zm00001d008259/Zm00001d010500/Zm00001d012030/Zm00001d014280/Zm00001d020011/Zm00001d021590/Zm00001d021621/Zm00001d022000/Zm00001d022125/Zm00001d022343/Zm00001d026263/Zm00001d027726/Zm00001d028695/Zm00001d029133/Zm00001d030774/Zm00001d034914/Zm00001d040389/Zm00001d043861/Zm00001d047534/Zm00001d048253/Zm00001d048741/Zm00001d051838/Zm00001d052453	severe depolymerization of actin1/-/-/-/-/-/-/-/-/-/-/-/-/-/-/-/-/-/-/-/-/-/-/-/-	25
BP	GO:0051336	regulation of hydrolase activity	64/3483	322/22306	0.0229508	0.194275	Zm00001d002272/Zm00001d003904/Zm00001d004639/Zm00001d004640/Zm00001d005902/Zm00001d006192/Zm00001d006602/Zm00001d007081/Zm00001d008330/Zm00001d010290/Zm00001d011233/Zm00001d011282/Zm00001d011855/Zm00001d011877/Zm00001d012126/Zm00001d012667/Zm00001d013301/Zm00001d013840/Zm00001d013891/Zm00001d014037/Zm00001d015227/Zm00001d015228/Zm00001d017215/Zm00001d019263/Zm00001d019287/Zm00001d021240/Zm00001d0…	-/-/-/-/-/-/-/-/-/-/-/-/-/-/-/-/-/-/-/-/-/-/-/-/-/-/-/-/-/-/-/-/high chlorophyll fluorescence3/-/-/-/-/-/-/-/-/-/-/cystatin5/-/-/-/-/-/-/-/-/-/-/-/-/-/-/-/minichromosome maintenance7/-/-/-/-	64
BP	GO:0010564	regulation of cell cycle process	38/3483	177/22306	0.0234738	0.197928	Zm00001d002154/Zm00001d002662/Zm00001d004709/Zm00001d005269/Zm00001d007407/Zm00001d007585/Zm00001d007943/Zm00001d010656/Zm00001d012560/Zm00001d014913/Zm00001d018057/Zm00001d018657/Zm00001d023279/Zm00001d023760/Zm00001d023908/Zm00001d024953/Zm00001d028143/Zm00001d031268/Zm00001d031678/Zm00001d032575/Zm00001d033365/Zm00001d034082/Zm00001d034166/Zm00001d035869/Zm00001d037979/Zm00001d037981/Zm00001d0…	meiotic recombination protein 11 homolog A/cyclin8/-/-/related to retinoblastoma1/-/-/cyclin1/cyclin7/-/-/-/-/chitin synthase homolog1/-/-/-/methyl binding domain119/retinoblastoma family3/-/-/-/-/-/-/-/-/-/-/-/origin recognition complex1/-/-/-/-/-/-/-	38
BP	GO:0070988	demethylation	12/3483	42/22306	0.0237208	0.199236	Zm00001d002420/Zm00001d003590/Zm00001d006580/Zm00001d014900/Zm00001d017700/Zm00001d021145/Zm00001d030108/Zm00001d031291/Zm00001d037313/Zm00001d048404/Zm00001d051849/Zm00001d054070	-/-/-/PHD-transcription factor 29/JUMONJI-transcription factor 15/-/JUMONJI-transcription factor 14/-/JUMONJI-transcription factor 7/JUMONJI-transcription factor 20/JUMONJI-transcription factor 21/JUMONJI-transcription factor 12	12
BP	GO:0016482	cytosolic transport	13/3483	47/22306	0.0247543	0.206658	Zm00001d004396/Zm00001d006433/Zm00001d006939/Zm00001d011266/Zm00001d013059/Zm00001d013314/Zm00001d016049/Zm00001d025044/Zm00001d033488/Zm00001d034492/Zm00001d042451/Zm00001d044367/Zm00001d053371	-/-/-/-/-/vesicular transport protein1/-/-/-/-/-/-/-	13
BP	GO:0031647	regulation of protein stability	8/3483	24/22306	0.0247952	0.206658	Zm00001d007904/Zm00001d011401/Zm00001d018859/Zm00001d023640/Zm00001d031332/Zm00001d041035/Zm00001d043312/Zm00001d052943	-/-/-/-/-/-/-/-	8
BP	GO:0051648	vesicle localization	10/3483	33/22306	0.0251432	0.207959	Zm00001d004639/Zm00001d004640/Zm00001d005902/Zm00001d013301/Zm00001d020485/Zm00001d022502/Zm00001d035889/Zm00001d048857/Zm00001d049155/Zm00001d054076	-/-/-/-/-/-/-/-/-/-	10
BP	GO:0051650	establishment of vesicle localization	10/3483	33/22306	0.0251432	0.207959	Zm00001d004639/Zm00001d004640/Zm00001d005902/Zm00001d013301/Zm00001d020485/Zm00001d022502/Zm00001d035889/Zm00001d048857/Zm00001d049155/Zm00001d054076	-/-/-/-/-/-/-/-/-/-	10
BP	GO:0010038	response to metal ion	19/3483	77/22306	0.025674	0.209871	Zm00001d005347/Zm00001d010599/Zm00001d010954/Zm00001d016198/Zm00001d016615/Zm00001d017427/Zm00001d018197/Zm00001d018386/Zm00001d024521/Zm00001d027511/Zm00001d027861/Zm00001d027966/Zm00001d031908/Zm00001d033597/Zm00001d042842/Zm00001d042939/Zm00001d043194/Zm00001d044102/Zm00001d053658	monodehydroascorbate reductase homolog1/-/-/glutamate-oxaloacetic transaminase3/-/-/pyrophosphate-energized proton pump1/glutamate-oxaloacetate transaminase2/-/catalase2/-/-/-/-/starch phoshorylase2/-/-/-/-	19
BP	GO:0031329	regulation of cellular catabolic process	18/3483	72/22306	0.0259233	0.209871	Zm00001d003207/Zm00001d005502/Zm00001d014297/Zm00001d015886/Zm00001d019920/Zm00001d025673/Zm00001d025750/Zm00001d026676/Zm00001d028285/Zm00001d030398/Zm00001d031178/Zm00001d032875/Zm00001d035574/Zm00001d037950/Zm00001d047833/Zm00001d050090/Zm00001d050616/Zm00001d052888	-/-/histidine kinase3/-/-/-/-/-/-/-/-/-/-/-/autophagy1c/-/-/-	18
BP	GO:0007018	microtubule-based movement	27/3483	119/22306	0.0265544	0.209871	Zm00001d001928/Zm00001d002186/Zm00001d003644/Zm00001d009233/Zm00001d011405/Zm00001d013859/Zm00001d016273/Zm00001d018009/Zm00001d018246/Zm00001d018441/Zm00001d018624/Zm00001d019670/Zm00001d021269/Zm00001d025149/Zm00001d025951/Zm00001d026548/Zm00001d032464/Zm00001d034239/Zm00001d034590/Zm00001d035526/Zm00001d036090/Zm00001d037599/Zm00001d038383/Zm00001d042795/Zm00001d044903/Zm00001d052120/Zm00001d0…	-/divergent spindle1/-/-/-/-/-/-/-/-/kinesin-related protein11/-/-/-/kinesin-related protein15/-/-/-/-/-/-/kinesin-related protein9/-/-/-/-/-	27
BP	GO:0000373	Group II intron splicing	7/3483	20/22306	0.0268276	0.209871	Zm00001d007572/Zm00001d017751/Zm00001d017982/Zm00001d019573/Zm00001d027751/Zm00001d040696/Zm00001d041480	CRM family member3/organelle transcript processing51/-/crs2 associated factor1/-/crs2 associated factor2/-	7
BP	GO:0048209	regulation of vesicle targeting, to, from or within Golgi	7/3483	20/22306	0.0268276	0.209871	Zm00001d004639/Zm00001d004640/Zm00001d005902/Zm00001d013301/Zm00001d020485/Zm00001d048857/Zm00001d049155	-/-/-/-/-/-/-	7
BP	GO:0009742	brassinosteroid mediated signaling pathway	11/3483	38/22306	0.0270366	0.209871	Zm00001d013680/Zm00001d014705/Zm00001d018369/Zm00001d027523/Zm00001d030021/Zm00001d033217/Zm00001d037110/Zm00001d039439/Zm00001d041307/Zm00001d048345/Zm00001d052423	-/C3H-transcription factor 329/-/-/-/-/-/BZR-transcription factor 2/-/-/-	11
BP	GO:0018230	peptidyl-L-cysteine S-palmitoylation	11/3483	38/22306	0.0270366	0.209871	Zm00001d002534/Zm00001d006102/Zm00001d022038/Zm00001d026600/Zm00001d028619/Zm00001d038321/Zm00001d044647/Zm00001d047439/Zm00001d047805/Zm00001d049857/Zm00001d051421	-/-/-/-/-/-/-/-/-/-/-	11
BP	GO:0018231	peptidyl-S-diacylglycerol-L-cysteine biosynthetic process from peptidyl-cysteine	11/3483	38/22306	0.0270366	0.209871	Zm00001d002534/Zm00001d006102/Zm00001d022038/Zm00001d026600/Zm00001d028619/Zm00001d038321/Zm00001d044647/Zm00001d047439/Zm00001d047805/Zm00001d049857/Zm00001d051421	-/-/-/-/-/-/-/-/-/-/-	11
BP	GO:0018345	protein palmitoylation	11/3483	38/22306	0.0270366	0.209871	Zm00001d002534/Zm00001d006102/Zm00001d022038/Zm00001d026600/Zm00001d028619/Zm00001d038321/Zm00001d044647/Zm00001d047439/Zm00001d047805/Zm00001d049857/Zm00001d051421	-/-/-/-/-/-/-/-/-/-/-	11
BP	GO:0043401	steroid hormone mediated signaling pathway	11/3483	38/22306	0.0270366	0.209871	Zm00001d013680/Zm00001d014705/Zm00001d018369/Zm00001d027523/Zm00001d030021/Zm00001d033217/Zm00001d037110/Zm00001d039439/Zm00001d041307/Zm00001d048345/Zm00001d052423	-/C3H-transcription factor 329/-/-/-/-/-/BZR-transcription factor 2/-/-/-	11
BP	GO:0045862	positive regulation of proteolysis	11/3483	38/22306	0.0270366	0.209871	Zm00001d003207/Zm00001d015886/Zm00001d023520/Zm00001d025750/Zm00001d028285/Zm00001d031178/Zm00001d037401/Zm00001d039154/Zm00001d041911/Zm00001d050090/Zm00001d050616	-/-/-/-/-/-/-/-/-/-/-	11
BP	GO:0048545	response to steroid hormone	11/3483	38/22306	0.0270366	0.209871	Zm00001d013680/Zm00001d014705/Zm00001d018369/Zm00001d027523/Zm00001d030021/Zm00001d033217/Zm00001d037110/Zm00001d039439/Zm00001d041307/Zm00001d048345/Zm00001d052423	-/C3H-transcription factor 329/-/-/-/-/-/BZR-transcription factor 2/-/-/-	11
BP	GO:0071383	cellular response to steroid hormone stimulus	11/3483	38/22306	0.0270366	0.209871	Zm00001d013680/Zm00001d014705/Zm00001d018369/Zm00001d027523/Zm00001d030021/Zm00001d033217/Zm00001d037110/Zm00001d039439/Zm00001d041307/Zm00001d048345/Zm00001d052423	-/C3H-transcription factor 329/-/-/-/-/-/BZR-transcription factor 2/-/-/-	11
BP	GO:0048229	gametophyte development	22/3483	93/22306	0.0274453	0.209871	Zm00001d005269/Zm00001d006168/Zm00001d010567/Zm00001d012510/Zm00001d012824/Zm00001d013274/Zm00001d014685/Zm00001d015134/Zm00001d015249/Zm00001d016452/Zm00001d020970/Zm00001d023839/Zm00001d028238/Zm00001d030266/Zm00001d033368/Zm00001d033454/Zm00001d038475/Zm00001d038973/Zm00001d040116/Zm00001d044358/Zm00001d048337/Zm00001d053930	-/-/-/-/-/-/-/-/-/-/dihydroflavonoid reductase1/-/-/-/-/GRMZM2G039373/ribosome export associated1/-/-/-/-/-	22
BP	GO:0000972	transcription-dependent tethering of RNA polymerase II gene DNA at nuclear periphery	5/3483	12/22306	0.0280628	0.209871	Zm00001d007065/Zm00001d024158/Zm00001d028262/Zm00001d048047/Zm00001d048741	-/-/-/-/-	5
BP	GO:0016093	polyprenol metabolic process	5/3483	12/22306	0.0280628	0.209871	Zm00001d009520/Zm00001d012312/Zm00001d026064/Zm00001d028152/Zm00001d045159	-/-/-/-/-	5
BP	GO:0045040	protein import into mitochondrial outer membrane	5/3483	12/22306	0.0280628	0.209871	Zm00001d012017/Zm00001d015837/Zm00001d023220/Zm00001d042329/Zm00001d053664	-/-/-/-/-	5
BP	GO:0051013	microtubule severing	5/3483	12/22306	0.0280628	0.209871	Zm00001d011563/Zm00001d026621/Zm00001d032598/Zm00001d041083/Zm00001d043841	-/-/-/-/-	5
BP	GO:0000911	cytokinesis by cell plate formation	6/3483	16/22306	0.0282097	0.209871	Zm00001d005269/Zm00001d023908/Zm00001d027412/Zm00001d042262/Zm00001d044273/Zm00001d053930	-/-/dicer-like 101/-/-/-	6
BP	GO:0003400	regulation of COPII vesicle coating	6/3483	16/22306	0.0282097	0.209871	Zm00001d004639/Zm00001d004640/Zm00001d005902/Zm00001d013301/Zm00001d048857/Zm00001d049155	-/-/-/-/-/-	6
BP	GO:0007266	Rho protein signal transduction	6/3483	16/22306	0.0282097	0.209871	Zm00001d017859/Zm00001d018004/Zm00001d034590/Zm00001d044802/Zm00001d051687/Zm00001d052273	-/Rho-related protein from plants 1/-/Rho-related protein from plants 5/-/Rho-related protein from plants 8	6
BP	GO:0060260	regulation of transcription initiation from RNA polymerase II promoter	6/3483	16/22306	0.0282097	0.209871	Zm00001d011680/Zm00001d015886/Zm00001d016439/Zm00001d046539/Zm00001d050616/Zm00001d053616	p15 (PC4 Sub1)-transcription factor 3/-/-/-/-/-	6
BP	GO:0060261	positive regulation of transcription initiation from RNA polymerase II promoter	6/3483	16/22306	0.0282097	0.209871	Zm00001d011680/Zm00001d015886/Zm00001d016439/Zm00001d046539/Zm00001d050616/Zm00001d053616	p15 (PC4 Sub1)-transcription factor 3/-/-/-/-/-	6
BP	GO:0060548	negative regulation of cell death	6/3483	16/22306	0.0282097	0.209871	Zm00001d010811/Zm00001d016615/Zm00001d017809/Zm00001d021524/Zm00001d038097/Zm00001d051609	-/-/-/-/-/-	6
BP	GO:0090113	regulation of ER to Golgi vesicle-mediated transport by GTP hydrolysis	6/3483	16/22306	0.0282097	0.209871	Zm00001d004639/Zm00001d004640/Zm00001d005902/Zm00001d013301/Zm00001d048857/Zm00001d049155	-/-/-/-/-/-	6
BP	GO:1901568	fatty acid derivative metabolic process	6/3483	16/22306	0.0282097	0.209871	Zm00001d015477/Zm00001d019850/Zm00001d048337/Zm00001d048691/Zm00001d052444/Zm00001d054067	-/-/-/-/-/hydroperoxide lyase1	6
BP	GO:2000144	positive regulation of DNA-templated transcription, initiation	6/3483	16/22306	0.0282097	0.209871	Zm00001d011680/Zm00001d015886/Zm00001d016439/Zm00001d046539/Zm00001d050616/Zm00001d053616	p15 (PC4 Sub1)-transcription factor 3/-/-/-/-/-	6
BP	GO:0006482	protein demethylation	9/3483	29/22306	0.0282798	0.209871	Zm00001d003590/Zm00001d006580/Zm00001d014900/Zm00001d017700/Zm00001d030108/Zm00001d037313/Zm00001d048404/Zm00001d051849/Zm00001d054070	-/-/PHD-transcription factor 29/JUMONJI-transcription factor 15/JUMONJI-transcription factor 14/JUMONJI-transcription factor 7/JUMONJI-transcription factor 20/JUMONJI-transcription factor 21/JUMONJI-transcription factor 12	9
BP	GO:0008214	protein dealkylation	9/3483	29/22306	0.0282798	0.209871	Zm00001d003590/Zm00001d006580/Zm00001d014900/Zm00001d017700/Zm00001d030108/Zm00001d037313/Zm00001d048404/Zm00001d051849/Zm00001d054070	-/-/PHD-transcription factor 29/JUMONJI-transcription factor 15/JUMONJI-transcription factor 14/JUMONJI-transcription factor 7/JUMONJI-transcription factor 20/JUMONJI-transcription factor 21/JUMONJI-transcription factor 12	9
BP	GO:0016575	histone deacetylation	9/3483	29/22306	0.0282798	0.209871	Zm00001d004383/Zm00001d006789/Zm00001d008429/Zm00001d010206/Zm00001d025048/Zm00001d025705/Zm00001d040123/Zm00001d046388/Zm00001d050244	leunig-related6/-/-/-/-/-/-/-/-	9
BP	GO:0016236	macroautophagy	19/3483	78/22306	0.0291261	0.215414	Zm00001d000178/Zm00001d004639/Zm00001d004640/Zm00001d005902/Zm00001d013301/Zm00001d014124/Zm00001d018382/Zm00001d026676/Zm00001d027707/Zm00001d033368/Zm00001d037950/Zm00001d047833/Zm00001d048902/Zm00001d049155/Zm00001d051021/Zm00001d051033/Zm00001d051307/Zm00001d052028/Zm00001d053741	autophagy3/-/-/-/-/-/vacuolar protein sorting2/-/-/-/-/autophagy1c/-/-/-/autophagy101/autophagy13a/-/autophagy11a	19
BP	GO:0022411	cellular component disassembly	34/3483	158/22306	0.0297894	0.21957	Zm00001d000178/Zm00001d001983/Zm00001d002822/Zm00001d006372/Zm00001d007692/Zm00001d007940/Zm00001d012052/Zm00001d012966/Zm00001d013141/Zm00001d014124/Zm00001d014368/Zm00001d015893/Zm00001d018330/Zm00001d022042/Zm00001d025100/Zm00001d025715/Zm00001d025948/Zm00001d026621/Zm00001d027707/Zm00001d029343/Zm00001d031581/Zm00001d032598/Zm00001d034239/Zm00001d034575/Zm00001d035051/Zm00001d037497/Zm00001d0…	autophagy3/-/-/actin depolymerizing factor2/-/-/-/-/-/-/-/-/-/eukaryotic translation initiation factor 5A/-/-/-/-/-/-/-/-/-/-/-/-/-/-/-/-/-/-/autophagy13a/autophagy11a	34
BP	GO:0042435	indole-containing compound biosynthetic process	10/3483	34/22306	0.0307781	0.226089	Zm00001d003395/Zm00001d023724/Zm00001d024393/Zm00001d025652/Zm00001d028536/Zm00001d029548/Zm00001d038071/Zm00001d038142/Zm00001d048461/Zm00001d049541	anthranilate synthase homolog1/-/-/-/-/csu323/-/-/blue fluorescent1/brown midrib3	10
BP	GO:0010243	response to organonitrogen compound	28/3483	126/22306	0.0311932	0.228363	Zm00001d000390/Zm00001d001962/Zm00001d002856/Zm00001d005064/Zm00001d010454/Zm00001d012643/Zm00001d014124/Zm00001d016142/Zm00001d017997/Zm00001d019287/Zm00001d021498/Zm00001d023230/Zm00001d027707/Zm00001d029561/Zm00001d030020/Zm00001d030620/Zm00001d033383/Zm00001d033502/Zm00001d036765/Zm00001d042661/Zm00001d044551/Zm00001d045049/Zm00001d045133/Zm00001d046539/Zm00001d046624/Zm00001d047306/Zm00001d0…	-/-/-/-/-/-/-/-/-/-/-/-/-/-/pyruvate kinase1/-/hydroxymethylpyrimidine phosphate synthase1/-/-/-/-/ubiquitin conjugating enzyme2/-/-/-/-/-/-	28
BP	GO:0031929	TOR signaling	8/3483	25/22306	0.0316062	0.230608	Zm00001d005064/Zm00001d014413/Zm00001d019287/Zm00001d023230/Zm00001d024463/Zm00001d034862/Zm00001d037950/Zm00001d052327	-/tel2-interacting protein1/-/-/-/-/-/-	8
BP	GO:1902679	negative regulation of RNA biosynthetic process	47/3483	231/22306	0.0318623	0.230922	Zm00001d002594/Zm00001d004383/Zm00001d006918/Zm00001d007407/Zm00001d007436/Zm00001d008233/Zm00001d008429/Zm00001d009520/Zm00001d011158/Zm00001d012052/Zm00001d012108/Zm00001d013278/Zm00001d013440/Zm00001d014909/Zm00001d015765/Zm00001d016518/Zm00001d017962/Zm00001d018218/Zm00001d018890/Zm00001d019789/Zm00001d020182/Zm00001d021145/Zm00001d021467/Zm00001d022069/Zm00001d023706/Zm00001d025048/Zm00001d0…	OVATE-transcription factor 7/leunig-related6/-/related to retinoblastoma1/CCAAT-HAP5-transcription factor 58/-/-/-/PHD-transcription factor 10/-/-/PHD-transcription factor 25/-/-/-/-/-/GNAT-transcription factor 26/-/-/histone acetyltransferase1/-/-/-/-/-/-/-/-/methyl binding domain119/retinoblastoma family3/-/PHD-transcription factor 15/-/-/enhancer of zeste1/PHD-transcription factor 38/-/-/OVATE…	47
BP	GO:1903507	negative regulation of nucleic acid-templated transcription	47/3483	231/22306	0.0318623	0.230922	Zm00001d002594/Zm00001d004383/Zm00001d006918/Zm00001d007407/Zm00001d007436/Zm00001d008233/Zm00001d008429/Zm00001d009520/Zm00001d011158/Zm00001d012052/Zm00001d012108/Zm00001d013278/Zm00001d013440/Zm00001d014909/Zm00001d015765/Zm00001d016518/Zm00001d017962/Zm00001d018218/Zm00001d018890/Zm00001d019789/Zm00001d020182/Zm00001d021145/Zm00001d021467/Zm00001d022069/Zm00001d023706/Zm00001d025048/Zm00001d0…	OVATE-transcription factor 7/leunig-related6/-/related to retinoblastoma1/CCAAT-HAP5-transcription factor 58/-/-/-/PHD-transcription factor 10/-/-/PHD-transcription factor 25/-/-/-/-/-/GNAT-transcription factor 26/-/-/histone acetyltransferase1/-/-/-/-/-/-/-/-/methyl binding domain119/retinoblastoma family3/-/PHD-transcription factor 15/-/-/enhancer of zeste1/PHD-transcription factor 38/-/-/OVATE…	47
BP	GO:0071367	cellular response to brassinosteroid stimulus	11/3483	39/22306	0.0325041	0.234788	Zm00001d013680/Zm00001d014705/Zm00001d018369/Zm00001d027523/Zm00001d030021/Zm00001d033217/Zm00001d037110/Zm00001d039439/Zm00001d041307/Zm00001d048345/Zm00001d052423	-/C3H-transcription factor 329/-/-/-/-/-/BZR-transcription factor 2/-/-/-	11
BP	GO:0007265	Ras protein signal transduction	19/3483	79/22306	0.0329143	0.236961	Zm00001d006433/Zm00001d006509/Zm00001d006607/Zm00001d011717/Zm00001d014278/Zm00001d017456/Zm00001d017859/Zm00001d018004/Zm00001d021806/Zm00001d024612/Zm00001d034590/Zm00001d037004/Zm00001d038709/Zm00001d044802/Zm00001d046313/Zm00001d046717/Zm00001d050915/Zm00001d051687/Zm00001d052273	-/-/-/-/-/ypt homolog4/-/Rho-related protein from plants 1/-/-/-/-/-/Rho-related protein from plants 5/-/-/ypt homolog3/-/Rho-related protein from plants 8	19
BP	GO:0090351	seedling development	12/3483	44/22306	0.0336298	0.24131	Zm00001d011595/Zm00001d012052/Zm00001d014297/Zm00001d022236/Zm00001d028485/Zm00001d031494/Zm00001d037110/Zm00001d039634/Zm00001d039860/Zm00001d042720/Zm00001d043948/Zm00001d044917	-/-/histidine kinase3/-/-/-/-/dwarf plant1/-/-/-/-	12
BP	GO:0045047	protein targeting to ER	13/3483	49/22306	0.0342893	0.242084	Zm00001d000349/Zm00001d001882/Zm00001d003502/Zm00001d004119/Zm00001d013642/Zm00001d021401/Zm00001d027293/Zm00001d034805/Zm00001d037422/Zm00001d042044/Zm00001d043303/Zm00001d048100/Zm00001d052556	-/-/-/-/-/-/signal recognition particle receptor homolog1/-/-/-/-/-/-	13
BP	GO:0072599	establishment of protein localization to endoplasmic reticulum	13/3483	49/22306	0.0342893	0.242084	Zm00001d000349/Zm00001d001882/Zm00001d003502/Zm00001d004119/Zm00001d013642/Zm00001d021401/Zm00001d027293/Zm00001d034805/Zm00001d037422/Zm00001d042044/Zm00001d043303/Zm00001d048100/Zm00001d052556	-/-/-/-/-/-/signal recognition particle receptor homolog1/-/-/-/-/-/-	13
BP	GO:0032786	positive regulation of DNA-templated transcription, elongation	14/3483	54/22306	0.0345866	0.242084	Zm00001d006759/Zm00001d009791/Zm00001d013371/Zm00001d014337/Zm00001d016846/Zm00001d017392/Zm00001d018664/Zm00001d020158/Zm00001d026030/Zm00001d027790/Zm00001d035050/Zm00001d038570/Zm00001d044753/Zm00001d051291	-/-/-/-/-/-/-/-/-/-/-/-/-/-	14
BP	GO:0033044	regulation of chromosome organization	25/3483	111/22306	0.0345897	0.242084	Zm00001d005502/Zm00001d007585/Zm00001d007943/Zm00001d012751/Zm00001d013440/Zm00001d014913/Zm00001d015265/Zm00001d018218/Zm00001d018657/Zm00001d019789/Zm00001d019920/Zm00001d021145/Zm00001d023279/Zm00001d026153/Zm00001d026612/Zm00001d032575/Zm00001d037979/Zm00001d037981/Zm00001d038812/Zm00001d042639/Zm00001d044358/Zm00001d044630/Zm00001d047427/Zm00001d049190/Zm00001d052353	-/-/-/Homeobox-transcription factor 9/-/-/Homeobox-transcription factor 28/GNAT-transcription factor 26/-/-/-/-/-/-/-/-/-/-/Homeobox-transcription factor 92/-/-/-/-/minichromosome maintenance7/-	25
BP	GO:0051235	maintenance of location	15/3483	59/22306	0.0346022	0.242084	Zm00001d004655/Zm00001d007229/Zm00001d013421/Zm00001d021306/Zm00001d028596/Zm00001d030935/Zm00001d035088/Zm00001d035089/Zm00001d036443/Zm00001d038754/Zm00001d040178/Zm00001d045323/Zm00001d046973/Zm00001d047074/Zm00001d053262	-/-/-/-/-/-/-/-/-/-/-/double B-box zinc finger protein11/-/-/-	15
BP	GO:0080135	regulation of cellular response to stress	15/3483	59/22306	0.0346022	0.242084	Zm00001d005812/Zm00001d013757/Zm00001d014977/Zm00001d017809/Zm00001d018057/Zm00001d018902/Zm00001d021498/Zm00001d036531/Zm00001d038097/Zm00001d041083/Zm00001d042302/Zm00001d044358/Zm00001d051609/Zm00001d052101/Zm00001d053680	-/-/brahma1/-/-/-/-/-/-/-/-/-/-/chaperonin10/-	15
BP	GO:0009736	cytokinin-activated signaling pathway	7/3483	21/22306	0.0349599	0.242084	Zm00001d001865/Zm00001d014297/Zm00001d017977/Zm00001d031938/Zm00001d031961/Zm00001d042312/Zm00001d045738	cytokinin response regulator1/histidine kinase3/histidine kinase1/-/histidine-containing phosphotransfer protein1/histidine kinase2/-	7
BP	GO:0043244	regulation of protein complex disassembly	7/3483	21/22306	0.0349599	0.242084	Zm00001d007940/Zm00001d012052/Zm00001d022042/Zm00001d029343/Zm00001d034575/Zm00001d037497/Zm00001d042097	-/-/eukaryotic translation initiation factor 5A/-/-/-/-	7
BP	GO:0071368	cellular response to cytokinin stimulus	7/3483	21/22306	0.0349599	0.242084	Zm00001d001865/Zm00001d014297/Zm00001d017977/Zm00001d031938/Zm00001d031961/Zm00001d042312/Zm00001d045738	cytokinin response regulator1/histidine kinase3/histidine kinase1/-/histidine-containing phosphotransfer protein1/histidine kinase2/-	7
BP	GO:2000142	regulation of DNA-templated transcription, initiation	7/3483	21/22306	0.0349599	0.242084	Zm00001d011680/Zm00001d015886/Zm00001d016439/Zm00001d028585/Zm00001d046539/Zm00001d050616/Zm00001d053616	p15 (PC4 Sub1)-transcription factor 3/-/-/Sigma70-like-transcription factor 3/-/-/-	7
BP	GO:0006476	protein deacetylation	9/3483	30/22306	0.0349664	0.242084	Zm00001d004383/Zm00001d006789/Zm00001d008429/Zm00001d010206/Zm00001d025048/Zm00001d025705/Zm00001d040123/Zm00001d046388/Zm00001d050244	leunig-related6/-/-/-/-/-/-/-/-	9
BP	GO:1901605	alpha-amino acid metabolic process	69/3483	359/22306	0.0367114	0.253355	Zm00001d002003/Zm00001d002051/Zm00001d002358/Zm00001d003395/Zm00001d006214/Zm00001d009738/Zm00001d013223/Zm00001d013992/Zm00001d015599/Zm00001d017676/Zm00001d017790/Zm00001d017958/Zm00001d019054/Zm00001d019698/Zm00001d020696/Zm00001d020908/Zm00001d021956/Zm00001d022388/Zm00001d023429/Zm00001d023437/Zm00001d023724/Zm00001d024393/Zm00001d025652/Zm00001d026501/Zm00001d027319/Zm00001d027385/Zm00001d0…	-/-/necrotic4/anthranilate synthase homolog1/-/-/-/-/-/-/-/glutamine synthetase4/-/-/-/-/GNAT-transcription factor 33/ferredoxin-dependent glutamate synthase1/-/glycine decarboxylase1/-/-/-/glutamine synthetase1/-/-/-/-/-/-/-/-/csu323/-/-/-/-/-/-/-/-/-/-/-/-/-/-/-/-/putative aldehyde dehydrogenase MIS1/-/-/-/-/-/-/-/-/-/-/-/blue fluorescent1/GNAT-transcription factor 39/-/aspartate kinase-homoser…	69
BP	GO:0006568	tryptophan metabolic process	10/3483	35/22306	0.0372466	0.255422	Zm00001d003395/Zm00001d015599/Zm00001d019698/Zm00001d023724/Zm00001d024393/Zm00001d025652/Zm00001d028536/Zm00001d029548/Zm00001d038142/Zm00001d048461	anthranilate synthase homolog1/-/-/-/-/-/-/csu323/-/blue fluorescent1	10
BP	GO:0006586	indolalkylamine metabolic process	10/3483	35/22306	0.0372466	0.255422	Zm00001d003395/Zm00001d015599/Zm00001d019698/Zm00001d023724/Zm00001d024393/Zm00001d025652/Zm00001d028536/Zm00001d029548/Zm00001d038142/Zm00001d048461	anthranilate synthase homolog1/-/-/-/-/-/-/csu323/-/blue fluorescent1	10
BP	GO:0018202	peptidyl-histidine modification	6/3483	17/22306	0.0379803	0.257318	Zm00001d013673/Zm00001d014297/Zm00001d017977/Zm00001d021261/Zm00001d034797/Zm00001d042312	-/histidine kinase3/histidine kinase1/-/-/histidine kinase2	6
BP	GO:0006897	endocytosis	22/3483	96/22306	0.0381124	0.257318	Zm00001d007270/Zm00001d007692/Zm00001d007889/Zm00001d008863/Zm00001d009452/Zm00001d011696/Zm00001d012761/Zm00001d014368/Zm00001d017050/Zm00001d023218/Zm00001d025853/Zm00001d027333/Zm00001d037484/Zm00001d037744/Zm00001d038892/Zm00001d039162/Zm00001d039296/Zm00001d039409/Zm00001d041647/Zm00001d048511/Zm00001d050925/Zm00001d052308	clathrin coat assembly protein AP17/-/-/-/-/-/-/-/-/-/-/-/-/-/-/-/-/-/-/-/-/-	22
BP	GO:0006914	autophagy	22/3483	96/22306	0.0381124	0.257318	Zm00001d000178/Zm00001d004639/Zm00001d004640/Zm00001d005902/Zm00001d013301/Zm00001d014124/Zm00001d018382/Zm00001d024239/Zm00001d026335/Zm00001d026641/Zm00001d026676/Zm00001d027707/Zm00001d033368/Zm00001d037950/Zm00001d047833/Zm00001d048902/Zm00001d049155/Zm00001d051021/Zm00001d051033/Zm00001d051307/Zm00001d052028/Zm00001d053741	autophagy3/-/-/-/-/-/vacuolar protein sorting2/autophagy8d/autophagy8b/autophagy4b/-/-/-/-/autophagy1c/-/-/-/autophagy101/autophagy13a/-/autophagy11a	22
BP	GO:0061919	process utilizing autophagic mechanism	22/3483	96/22306	0.0381124	0.257318	Zm00001d000178/Zm00001d004639/Zm00001d004640/Zm00001d005902/Zm00001d013301/Zm00001d014124/Zm00001d018382/Zm00001d024239/Zm00001d026335/Zm00001d026641/Zm00001d026676/Zm00001d027707/Zm00001d033368/Zm00001d037950/Zm00001d047833/Zm00001d048902/Zm00001d049155/Zm00001d051021/Zm00001d051033/Zm00001d051307/Zm00001d052028/Zm00001d053741	autophagy3/-/-/-/-/-/vacuolar protein sorting2/autophagy8d/autophagy8b/autophagy4b/-/-/-/-/autophagy1c/-/-/-/autophagy101/autophagy13a/-/autophagy11a	22
BP	GO:0042364	water-soluble vitamin biosynthetic process	17/3483	70/22306	0.0386194	0.257318	Zm00001d002326/Zm00001d002511/Zm00001d007936/Zm00001d011183/Zm00001d026476/Zm00001d027352/Zm00001d030657/Zm00001d031691/Zm00001d033110/Zm00001d033383/Zm00001d034493/Zm00001d037045/Zm00001d037507/Zm00001d041407/Zm00001d049380/Zm00001d050844/Zm00001d053981	adenosylmethionine aminotransferase1/-/-/thiamine biosynthesis1/-/-/-/-/-/hydroxymethylpyrimidine phosphate synthase1/-/-/-/-/-/-/small kernel2	17
BP	GO:0043484	regulation of RNA splicing	17/3483	70/22306	0.0386194	0.257318	Zm00001d006906/Zm00001d010901/Zm00001d014812/Zm00001d015194/Zm00001d022243/Zm00001d029256/Zm00001d031269/Zm00001d035551/Zm00001d037925/Zm00001d039417/Zm00001d042040/Zm00001d047498/Zm00001d047847/Zm00001d048609/Zm00001d050245/Zm00001d051052/Zm00001d053613	-/-/-/-/-/-/-/-/-/-/-/-/-/-/-/-/-	17
BP	GO:0048024	regulation of mRNA splicing, via spliceosome	17/3483	70/22306	0.0386194	0.257318	Zm00001d006906/Zm00001d010901/Zm00001d014812/Zm00001d015194/Zm00001d022243/Zm00001d029256/Zm00001d031269/Zm00001d035551/Zm00001d037925/Zm00001d039417/Zm00001d042040/Zm00001d047498/Zm00001d047847/Zm00001d048609/Zm00001d050245/Zm00001d051052/Zm00001d053613	-/-/-/-/-/-/-/-/-/-/-/-/-/-/-/-/-	17
BP	GO:0006904	vesicle docking involved in exocytosis	11/3483	40/22306	0.0387105	0.257318	Zm00001d004159/Zm00001d007760/Zm00001d013049/Zm00001d015890/Zm00001d019104/Zm00001d021828/Zm00001d022502/Zm00001d024205/Zm00001d025398/Zm00001d039196/Zm00001d049522	-/-/-/-/-/-/-/-/-/-/-	11
BP	GO:0046686	response to cadmium ion	11/3483	40/22306	0.0387105	0.257318	Zm00001d005347/Zm00001d016198/Zm00001d018197/Zm00001d018386/Zm00001d024521/Zm00001d027511/Zm00001d027861/Zm00001d042842/Zm00001d043194/Zm00001d044102/Zm00001d053658	monodehydroascorbate reductase homolog1/glutamate-oxaloacetic transaminase3/pyrophosphate-energized proton pump1/glutamate-oxaloacetate transaminase2/-/catalase2/-/starch phoshorylase2/-/-/-	11
BP	GO:0140029	exocytic process	11/3483	40/22306	0.0387105	0.257318	Zm00001d004159/Zm00001d007760/Zm00001d013049/Zm00001d015890/Zm00001d019104/Zm00001d021828/Zm00001d022502/Zm00001d024205/Zm00001d025398/Zm00001d039196/Zm00001d049522	-/-/-/-/-/-/-/-/-/-/-	11
BP	GO:0032784	regulation of DNA-templated transcription, elongation	16/3483	65/22306	0.0392382	0.257884	Zm00001d006759/Zm00001d009791/Zm00001d010719/Zm00001d013371/Zm00001d014337/Zm00001d016846/Zm00001d017392/Zm00001d018664/Zm00001d020158/Zm00001d026030/Zm00001d027790/Zm00001d035050/Zm00001d038570/Zm00001d044753/Zm00001d044971/Zm00001d051291	-/-/-/-/-/-/-/-/-/-/-/-/-/-/-/-	16
BP	GO:0009741	response to brassinosteroid	12/3483	45/22306	0.0395565	0.257884	Zm00001d013680/Zm00001d014705/Zm00001d018369/Zm00001d027523/Zm00001d030021/Zm00001d033217/Zm00001d033228/Zm00001d037110/Zm00001d039439/Zm00001d041307/Zm00001d048345/Zm00001d052423	-/C3H-transcription factor 329/-/-/-/-/-/-/BZR-transcription factor 2/-/-/-	12
BP	GO:0006821	chloride transport	8/3483	26/22306	0.0395906	0.257884	Zm00001d014327/Zm00001d016855/Zm00001d017868/Zm00001d031318/Zm00001d033597/Zm00001d037970/Zm00001d043721/Zm00001d051103	-/-/-/-/-/-/-/-	8
BP	GO:0051017	actin filament bundle assembly	8/3483	26/22306	0.0395906	0.257884	Zm00001d006533/Zm00001d011854/Zm00001d028550/Zm00001d037252/Zm00001d037497/Zm00001d040960/Zm00001d046905/Zm00001d051688	-/-/LIM-transcription factor 1/LIM-transcription factor 12/-/-/-/-	8
BP	GO:0061572	actin filament bundle organization	8/3483	26/22306	0.0395906	0.257884	Zm00001d006533/Zm00001d011854/Zm00001d028550/Zm00001d037252/Zm00001d037497/Zm00001d040960/Zm00001d046905/Zm00001d051688	-/-/LIM-transcription factor 1/LIM-transcription factor 12/-/-/-/-	8
BP	GO:0045898	regulation of RNA polymerase II transcriptional preinitiation complex assembly	5/3483	13/22306	0.0398667	0.257884	Zm00001d015886/Zm00001d016439/Zm00001d046539/Zm00001d050616/Zm00001d053616	-/-/-/-/-	5
BP	GO:0045899	positive regulation of RNA polymerase II transcriptional preinitiation complex assembly	5/3483	13/22306	0.0398667	0.257884	Zm00001d015886/Zm00001d016439/Zm00001d046539/Zm00001d050616/Zm00001d053616	-/-/-/-/-	5
BP	GO:0048870	cell motility	5/3483	13/22306	0.0398667	0.257884	Zm00001d018004/Zm00001d018535/Zm00001d023262/Zm00001d044802/Zm00001d052273	Rho-related protein from plants 1/brick1/brick3/Rho-related protein from plants 5/Rho-related protein from plants 8	5
BP	GO:0051674	localization of cell	5/3483	13/22306	0.0398667	0.257884	Zm00001d018004/Zm00001d018535/Zm00001d023262/Zm00001d044802/Zm00001d052273	Rho-related protein from plants 1/brick1/brick3/Rho-related protein from plants 5/Rho-related protein from plants 8	5
BP	GO:0036503	ERAD pathway	22/3483	97/22306	0.0422711	0.271149	Zm00001d000390/Zm00001d001962/Zm00001d002856/Zm00001d010454/Zm00001d012643/Zm00001d014124/Zm00001d016142/Zm00001d017997/Zm00001d019287/Zm00001d021498/Zm00001d027707/Zm00001d029561/Zm00001d030620/Zm00001d033502/Zm00001d036765/Zm00001d044551/Zm00001d045049/Zm00001d045133/Zm00001d046539/Zm00001d046624/Zm00001d047306/Zm00001d052721	-/-/-/-/-/-/-/-/-/-/-/-/-/-/-/-/ubiquitin conjugating enzyme2/-/-/-/-/-	22
BP	GO:0006450	regulation of translational fidelity	9/3483	31/22306	0.0426625	0.271149	Zm00001d002585/Zm00001d005558/Zm00001d006296/Zm00001d007905/Zm00001d018274/Zm00001d021815/Zm00001d036741/Zm00001d036888/Zm00001d046581	-/-/-/-/-/elongation initiation factor2/-/-/-	9
BP	GO:0034250	positive regulation of cellular amide metabolic process	9/3483	31/22306	0.0426625	0.271149	Zm00001d000213/Zm00001d003611/Zm00001d007940/Zm00001d021716/Zm00001d021815/Zm00001d022042/Zm00001d032163/Zm00001d034575/Zm00001d053861	-/-/-/chloroplast RNA processing1/elongation initiation factor2/eukaryotic translation initiation factor 5A/-/-/-	9
BP	GO:0045727	positive regulation of translation	9/3483	31/22306	0.0426625	0.271149	Zm00001d000213/Zm00001d003611/Zm00001d007940/Zm00001d021716/Zm00001d021815/Zm00001d022042/Zm00001d032163/Zm00001d034575/Zm00001d053861	-/-/-/chloroplast RNA processing1/elongation initiation factor2/eukaryotic translation initiation factor 5A/-/-/-	9
BP	GO:0048199	vesicle targeting, to, from or within Golgi	9/3483	31/22306	0.0426625	0.271149	Zm00001d004639/Zm00001d004640/Zm00001d005902/Zm00001d013301/Zm00001d020485/Zm00001d035889/Zm00001d048857/Zm00001d049155/Zm00001d054076	-/-/-/-/-/-/-/-/-	9
BP	GO:0008654	phospholipid biosynthetic process	35/3483	168/22306	0.0426682	0.271149	Zm00001d007638/Zm00001d010274/Zm00001d012034/Zm00001d012118/Zm00001d012701/Zm00001d015249/Zm00001d016990/Zm00001d017139/Zm00001d017654/Zm00001d018013/Zm00001d027485/Zm00001d028261/Zm00001d028698/Zm00001d029333/Zm00001d033149/Zm00001d033945/Zm00001d035030/Zm00001d036055/Zm00001d036631/Zm00001d037946/Zm00001d038389/Zm00001d038891/Zm00001d042802/Zm00001d043401/Zm00001d043842/Zm00001d044307/Zm00001d0…	phospholipid synthesis1/isopentenyl pyrophosphate isomerase2/-/-/-/-/-/hydroxymethylbutenyl diphosphate synthase1/-/-/-/-/-/-/-/C2C2-GATA-transcription factor 34/-/-/-/phospholipase D13/-/-/-/-/-/-/-/-/-/-/-/-/-/-/-	35
BP	GO:0045892	negative regulation of transcription, DNA-templated	43/3483	213/22306	0.0432272	0.273898	Zm00001d002594/Zm00001d006918/Zm00001d007407/Zm00001d007436/Zm00001d008233/Zm00001d008429/Zm00001d009520/Zm00001d011158/Zm00001d012052/Zm00001d013278/Zm00001d013440/Zm00001d014909/Zm00001d015765/Zm00001d016518/Zm00001d017962/Zm00001d018218/Zm00001d018890/Zm00001d019789/Zm00001d020182/Zm00001d021145/Zm00001d022069/Zm00001d023706/Zm00001d025705/Zm00001d027460/Zm00001d029529/Zm00001d031268/Zm00001d0…	OVATE-transcription factor 7/-/related to retinoblastoma1/CCAAT-HAP5-transcription factor 58/-/-/-/PHD-transcription factor 10/-/PHD-transcription factor 25/-/-/-/-/-/GNAT-transcription factor 26/-/-/histone acetyltransferase1/-/-/-/-/-/-/methyl binding domain119/retinoblastoma family3/-/PHD-transcription factor 15/-/-/enhancer of zeste1/PHD-transcription factor 38/-/-/OVATE-transcription factor …	43
BP	GO:0015919	peroxisomal membrane transport	7/3483	22/22306	0.0445693	0.280931	Zm00001d002462/Zm00001d006214/Zm00001d021301/Zm00001d032773/Zm00001d034358/Zm00001d039111/Zm00001d052851	-/-/LON peptidase1/-/-/-/-	7
BP	GO:0006012	galactose metabolic process	10/3483	36/22306	0.0445963	0.280931	Zm00001d002377/Zm00001d013428/Zm00001d018902/Zm00001d026311/Zm00001d028825/Zm00001d032346/Zm00001d033746/Zm00001d034733/Zm00001d035212/Zm00001d047683	-/phosphoglucomutase2/-/-/-/-/phosphoglucomutase1/-/-/-	10
BP	GO:0006354	DNA-templated transcription, elongation	20/3483	87/22306	0.0450754	0.283126	Zm00001d006759/Zm00001d009791/Zm00001d010719/Zm00001d012030/Zm00001d013371/Zm00001d014337/Zm00001d016846/Zm00001d017392/Zm00001d018664/Zm00001d020158/Zm00001d022141/Zm00001d026030/Zm00001d027790/Zm00001d035050/Zm00001d038570/Zm00001d043296/Zm00001d043434/Zm00001d044753/Zm00001d044971/Zm00001d051291	-/-/-/-/-/-/-/-/-/-/-/-/-/-/-/-/-/-/-/-	20
BP	GO:1902531	regulation of intracellular signal transduction	12/3483	46/22306	0.0461776	0.289211	Zm00001d006607/Zm00001d014413/Zm00001d017809/Zm00001d018057/Zm00001d019287/Zm00001d021806/Zm00001d024463/Zm00001d027257/Zm00001d034055/Zm00001d034862/Zm00001d046717/Zm00001d051609	-/tel2-interacting protein1/-/-/-/-/-/-/-/-/-/-	12
BP	GO:1903311	regulation of mRNA metabolic process	22/3483	98/22306	0.0467518	0.291963	Zm00001d006906/Zm00001d010901/Zm00001d014812/Zm00001d015194/Zm00001d022243/Zm00001d025673/Zm00001d029256/Zm00001d030398/Zm00001d031269/Zm00001d032875/Zm00001d035551/Zm00001d037925/Zm00001d038570/Zm00001d039417/Zm00001d042040/Zm00001d047498/Zm00001d047847/Zm00001d048609/Zm00001d050245/Zm00001d051052/Zm00001d052888/Zm00001d053613	-/-/-/-/-/-/-/-/-/-/-/-/-/-/-/-/-/-/-/-/-/-	22
BP	GO:0015980	energy derivation by oxidation of organic compounds	42/3483	209/22306	0.048232	0.300341	Zm00001d003083/Zm00001d003817/Zm00001d003923/Zm00001d003947/Zm00001d004564/Zm00001d006309/Zm00001d011301/Zm00001d011750/Zm00001d013428/Zm00001d014030/Zm00001d014772/Zm00001d016166/Zm00001d017258/Zm00001d017727/Zm00001d018758/Zm00001d019040/Zm00001d021908/Zm00001d022206/Zm00001d022510/Zm00001d024952/Zm00001d025258/Zm00001d025286/Zm00001d028773/Zm00001d032187/Zm00001d032455/Zm00001d032695/Zm00001d0…	-/starch branching enzyme3/-/-/-/UDP-glucose pyrophosphorylase1/-/-/phosphoglucomutase2/-/-/phosphoenolpyruvate carboxylase2/-/alternative oxidase1/succinate dehydrogenase1/-/-/-/-/aconitase2/-/iron-sulfur protein1/-/-/-/malate dehydrogenase4/phosphoglucomutase1/-/-/-/-/-/-/starch phoshorylase2/-/-/-/-/aconitase3/-/-/autophagy11a	42
BP	GO:0031146	SCF-dependent proteasomal ubiquitin-dependent protein catabolic process	21/3483	93/22306	0.0484073	0.300569	Zm00001d000224/Zm00001d000408/Zm00001d003112/Zm00001d005072/Zm00001d007357/Zm00001d007640/Zm00001d008428/Zm00001d010493/Zm00001d012219/Zm00001d023825/Zm00001d025268/Zm00001d033321/Zm00001d036573/Zm00001d037902/Zm00001d039723/Zm00001d041983/Zm00001d047848/Zm00001d048536/Zm00001d048695/Zm00001d049371/Zm00001d053358	-/-/-/umc255a/-/-/-/-/-/-/-/-/-/-/-/-/-/-/-/-/-	21
BP	GO:0006901	vesicle coating	8/3483	27/22306	0.0488125	0.300703	Zm00001d004639/Zm00001d004640/Zm00001d005902/Zm00001d013301/Zm00001d035889/Zm00001d048857/Zm00001d049155/Zm00001d054076	-/-/-/-/-/-/-/-	8
BP	GO:0031023	microtubule organizing center organization	8/3483	27/22306	0.0488125	0.300703	Zm00001d007953/Zm00001d012525/Zm00001d015020/Zm00001d024292/Zm00001d028073/Zm00001d037084/Zm00001d043093/Zm00001d048137	-/-/-/-/-/-/-/-	8
BP	GO:0006448	regulation of translational elongation	6/3483	18/22306	0.0496627	0.300703	Zm00001d007940/Zm00001d013673/Zm00001d022042/Zm00001d034575/Zm00001d034797/Zm00001d037422	-/-/eukaryotic translation initiation factor 5A/-/-/-	6
BP	GO:0010972	negative regulation of G2/M transition of mitotic cell cycle	6/3483	18/22306	0.0496627	0.300703	Zm00001d002154/Zm00001d004709/Zm00001d018057/Zm00001d042810/Zm00001d045080/Zm00001d047873	meiotic recombination protein 11 homolog A/-/-/-/origin recognition complex1/-	6
BP	GO:0015867	ATP transport	6/3483	18/22306	0.0496627	0.300703	Zm00001d010478/Zm00001d023368/Zm00001d038850/Zm00001d046509/Zm00001d051685/Zm00001d053640	-/-/-/-/adenine nucleotide translocator2/-	6
BP	GO:0032958	inositol phosphate biosynthetic process	6/3483	18/22306	0.0496627	0.300703	Zm00001d001974/Zm00001d026514/Zm00001d033551/Zm00001d033927/Zm00001d037110/Zm00001d037731	-/-/-/-/-/-	6
BP	GO:0044818	mitotic G2/M transition checkpoint	6/3483	18/22306	0.0496627	0.300703	Zm00001d002154/Zm00001d004709/Zm00001d018057/Zm00001d042810/Zm00001d045080/Zm00001d047873	meiotic recombination protein 11 homolog A/-/-/-/origin recognition complex1/-	6
BP	GO:1902750	negative regulation of cell cycle G2/M phase transition	6/3483	18/22306	0.0496627	0.300703	Zm00001d002154/Zm00001d004709/Zm00001d018057/Zm00001d042810/Zm00001d045080/Zm00001d047873	meiotic recombination protein 11 homolog A/-/-/-/origin recognition complex1/-	6
BP	GO:0018208	peptidyl-proline modification	23/3483	104/22306	0.0496778	0.300703	Zm00001d003192/Zm00001d004930/Zm00001d015729/Zm00001d016512/Zm00001d018134/Zm00001d020438/Zm00001d022631/Zm00001d027321/Zm00001d027385/Zm00001d028396/Zm00001d029272/Zm00001d031569/Zm00001d032573/Zm00001d036035/Zm00001d036620/Zm00001d038368/Zm00001d038531/Zm00001d040724/Zm00001d042372/Zm00001d044297/Zm00001d045476/Zm00001d047426/Zm00001d053805	-/-/-/-/-/-/-/-/-/-/-/-/-/-/-/-/-/-/-/-/-/-/-	23
BP	GO:0000160	phosphorelay signal transduction system	20/3483	88/22306	0.0500797	0.302292	Zm00001d001865/Zm00001d006212/Zm00001d012005/Zm00001d013262/Zm00001d013412/Zm00001d014297/Zm00001d017977/Zm00001d021291/Zm00001d022590/Zm00001d025705/Zm00001d028265/Zm00001d028905/Zm00001d031961/Zm00001d033642/Zm00001d037604/Zm00001d039341/Zm00001d042066/Zm00001d042312/Zm00001d042463/Zm00001d047761	cytokinin response regulator1/-/-/topoisomerase-like enzyme1/-/histidine kinase3/histidine kinase1/-/-/-/cytokinin response regulator8/phytochromeB1/histidine-containing phosphotransfer protein1/ethylene receptor1-25/-/ethylene insensitive 2/cytokinin response regulator5/histidine kinase2/ARR-B-transcription factor 6/-	20
BP	GO:0051656	establishment of organelle localization	26/3483	121/22306	0.0528848	0.310618	Zm00001d002056/Zm00001d002190/Zm00001d004639/Zm00001d004640/Zm00001d005902/Zm00001d010500/Zm00001d011716/Zm00001d013301/Zm00001d020485/Zm00001d021590/Zm00001d022502/Zm00001d024953/Zm00001d026263/Zm00001d034590/Zm00001d034914/Zm00001d035889/Zm00001d042639/Zm00001d043666/Zm00001d044220/Zm00001d044903/Zm00001d045323/Zm00001d045354/Zm00001d047534/Zm00001d048857/Zm00001d049155/Zm00001d054076	-/severe depolymerization of actin1/-/-/-/-/-/-/-/-/-/-/-/-/-/-/-/-/centromere protein C 1/-/double B-box zinc finger protein11/-/-/-/-/-	26
BP	GO:0000122	negative regulation of transcription by RNA polymerase II	13/3483	52/22306	0.0531207	0.310618	Zm00001d007407/Zm00001d007436/Zm00001d008429/Zm00001d015765/Zm00001d018890/Zm00001d023706/Zm00001d025705/Zm00001d031268/Zm00001d031678/Zm00001d035990/Zm00001d040123/Zm00001d044726/Zm00001d052695	related to retinoblastoma1/CCAAT-HAP5-transcription factor 58/-/-/-/-/-/methyl binding domain119/retinoblastoma family3/-/-/-/-	13
BP	GO:0006767	water-soluble vitamin metabolic process	18/3483	78/22306	0.0534279	0.310618	Zm00001d002326/Zm00001d002511/Zm00001d007936/Zm00001d011183/Zm00001d026476/Zm00001d027352/Zm00001d030657/Zm00001d031691/Zm00001d033110/Zm00001d033383/Zm00001d034493/Zm00001d037045/Zm00001d037507/Zm00001d041407/Zm00001d042661/Zm00001d049380/Zm00001d050844/Zm00001d053981	adenosylmethionine aminotransferase1/-/-/thiamine biosynthesis1/-/-/-/-/-/hydroxymethylpyrimidine phosphate synthase1/-/-/-/-/-/-/-/small kernel2	18
BP	GO:0007052	mitotic spindle organization	11/3483	42/22306	0.0534927	0.310618	Zm00001d005269/Zm00001d009780/Zm00001d014124/Zm00001d018009/Zm00001d019670/Zm00001d022114/Zm00001d025793/Zm00001d027707/Zm00001d034166/Zm00001d034680/Zm00001d048104	-/gamma-tubulin1/-/-/-/-/-/-/-/-/-	11
BP	GO:0009845	seed germination	11/3483	42/22306	0.0534927	0.310618	Zm00001d011595/Zm00001d012052/Zm00001d014297/Zm00001d022236/Zm00001d031494/Zm00001d037110/Zm00001d039634/Zm00001d039860/Zm00001d042720/Zm00001d043948/Zm00001d044917	-/-/histidine kinase3/-/-/-/dwarf plant1/-/-/-/-	11
BP	GO:0031109	microtubule polymerization or depolymerization	11/3483	42/22306	0.0534927	0.310618	Zm00001d009780/Zm00001d012525/Zm00001d021504/Zm00001d022114/Zm00001d025793/Zm00001d026621/Zm00001d032598/Zm00001d033414/Zm00001d034239/Zm00001d034680/Zm00001d043093	gamma-tubulin1/-/-/-/-/-/-/-/-/-/-	11
BP	GO:0001927	exocyst assembly	5/3483	14/22306	0.0542568	0.310618	Zm00001d007760/Zm00001d013049/Zm00001d019104/Zm00001d021828/Zm00001d025398	-/-/-/-/-	5
BP	GO:0030091	protein repair	5/3483	14/22306	0.0542568	0.310618	Zm00001d003426/Zm00001d010336/Zm00001d039363/Zm00001d046135/Zm00001d046971	-/methionine sulfoxide reductase b2/-/-/-	5
BP	GO:0033962	cytoplasmic mRNA processing body assembly	5/3483	14/22306	0.0542568	0.310618	Zm00001d002243/Zm00001d013910/Zm00001d015955/Zm00001d032526/Zm00001d038671	-/-/-/-/-	5
BP	GO:0043069	negative regulation of programmed cell death	5/3483	14/22306	0.0542568	0.310618	Zm00001d010811/Zm00001d017809/Zm00001d021524/Zm00001d038097/Zm00001d051609	-/-/-/-/-	5
BP	GO:2000024	regulation of leaf development	5/3483	14/22306	0.0542568	0.310618	Zm00001d009520/Zm00001d017771/Zm00001d028818/Zm00001d036296/Zm00001d045944	-/-/defective kernel1/enhancer of zeste1/-	5
BP	GO:2000278	regulation of DNA biosynthetic process	5/3483	14/22306	0.0542568	0.310618	Zm00001d005502/Zm00001d019920/Zm00001d026313/Zm00001d026612/Zm00001d047427	-/-/-/-/-	5
BP	GO:0031327	negative regulation of cellular biosynthetic process	68/3483	361/22306	0.0544448	0.310618	Zm00001d002594/Zm00001d004383/Zm00001d004568/Zm00001d004573/Zm00001d006918/Zm00001d007407/Zm00001d007436/Zm00001d008233/Zm00001d008429/Zm00001d008613/Zm00001d009520/Zm00001d011158/Zm00001d012052/Zm00001d012108/Zm00001d012824/Zm00001d013278/Zm00001d013440/Zm00001d013653/Zm00001d014909/Zm00001d014977/Zm00001d015765/Zm00001d016518/Zm00001d017574/Zm00001d017962/Zm00001d018218/Zm00001d018890/Zm00001d0…	OVATE-transcription factor 7/leunig-related6/-/-/-/related to retinoblastoma1/CCAAT-HAP5-transcription factor 58/-/-/-/-/PHD-transcription factor 10/-/-/-/PHD-transcription factor 25/-/-/-/brahma1/-/-/-/-/GNAT-transcription factor 26/-/-/histone acetyltransferase1/-/-/-/-/-/-/-/-/dicer-like 101/-/-/-/methyl binding domain119/retinoblastoma family3/-/-/-/-/PHD-transcription factor 15/-/-/enhancer …	68
BP	GO:0070585	protein localization to mitochondrion	23/3483	105/22306	0.054556	0.310618	Zm00001d003846/Zm00001d004051/Zm00001d005373/Zm00001d006107/Zm00001d012017/Zm00001d012930/Zm00001d014090/Zm00001d014516/Zm00001d015837/Zm00001d017847/Zm00001d023220/Zm00001d027672/Zm00001d027699/Zm00001d028485/Zm00001d028971/Zm00001d038776/Zm00001d042329/Zm00001d045181/Zm00001d048102/Zm00001d048506/Zm00001d050123/Zm00001d053664/Zm00001d054089	-/-/-/pyruvate dehydrogenase3/-/-/chaperonin 1/-/-/-/-/-/-/-/-/-/-/-/-/-/-/-/-	23
BP	GO:0072655	establishment of protein localization to mitochondrion	23/3483	105/22306	0.054556	0.310618	Zm00001d003846/Zm00001d004051/Zm00001d005373/Zm00001d006107/Zm00001d012017/Zm00001d012930/Zm00001d014090/Zm00001d014516/Zm00001d015837/Zm00001d017847/Zm00001d023220/Zm00001d027672/Zm00001d027699/Zm00001d028485/Zm00001d028971/Zm00001d038776/Zm00001d042329/Zm00001d045181/Zm00001d048102/Zm00001d048506/Zm00001d050123/Zm00001d053664/Zm00001d054089	-/-/-/pyruvate dehydrogenase3/-/-/chaperonin 1/-/-/-/-/-/-/-/-/-/-/-/-/-/-/-/-	23
BP	GO:0010638	positive regulation of organelle organization	17/3483	73/22306	0.0550702	0.310618	Zm00001d007806/Zm00001d007943/Zm00001d012751/Zm00001d015265/Zm00001d017106/Zm00001d018004/Zm00001d018484/Zm00001d018657/Zm00001d025134/Zm00001d033414/Zm00001d035183/Zm00001d035869/Zm00001d038812/Zm00001d042097/Zm00001d044802/Zm00001d045611/Zm00001d052273	-/-/Homeobox-transcription factor 9/Homeobox-transcription factor 28/-/Rho-related protein from plants 1/-/-/-/-/reaction to X. oryzae1/-/Homeobox-transcription factor 92/-/Rho-related protein from plants 5/-/Rho-related protein from plants 8	17
BP	GO:0006625	protein targeting to peroxisome	7/3483	23/22306	0.0557212	0.310618	Zm00001d002462/Zm00001d006214/Zm00001d021301/Zm00001d032773/Zm00001d034358/Zm00001d039111/Zm00001d052851	-/-/LON peptidase1/-/-/-/-	7
BP	GO:0010257	NADH dehydrogenase complex assembly	7/3483	23/22306	0.0557212	0.310618	Zm00001d011750/Zm00001d028485/Zm00001d031975/Zm00001d034244/Zm00001d035879/Zm00001d042620/Zm00001d053084	-/-/-/-/-/-/-	7
BP	GO:0072662	protein localization to peroxisome	7/3483	23/22306	0.0557212	0.310618	Zm00001d002462/Zm00001d006214/Zm00001d021301/Zm00001d032773/Zm00001d034358/Zm00001d039111/Zm00001d052851	-/-/LON peptidase1/-/-/-/-	7
BP	GO:0072663	establishment of protein localization to peroxisome	7/3483	23/22306	0.0557212	0.310618	Zm00001d002462/Zm00001d006214/Zm00001d021301/Zm00001d032773/Zm00001d034358/Zm00001d039111/Zm00001d052851	-/-/LON peptidase1/-/-/-/-	7
BP	GO:0009101	glycoprotein biosynthetic process	40/3483	200/22306	0.0561958	0.310618	Zm00001d002944/Zm00001d003878/Zm00001d005248/Zm00001d007764/Zm00001d009409/Zm00001d009520/Zm00001d013052/Zm00001d014361/Zm00001d015249/Zm00001d016506/Zm00001d017085/Zm00001d017767/Zm00001d025989/Zm00001d026064/Zm00001d027484/Zm00001d028152/Zm00001d028731/Zm00001d028980/Zm00001d032267/Zm00001d032400/Zm00001d034659/Zm00001d038804/Zm00001d039675/Zm00001d040435/Zm00001d040724/Zm00001d041504/Zm00001d0…	-/-/-/-/-/-/-/-/-/-/-/-/Aux/IAA-transcription factor 43/-/-/-/-/-/-/-/-/-/-/-/-/-/-/-/-/-/-/-/-/-/-/-/-/-/-/-	40
BP	GO:0070085	glycosylation	51/3483	263/22306	0.0564729	0.310618	Zm00001d002944/Zm00001d003878/Zm00001d004463/Zm00001d005248/Zm00001d007764/Zm00001d009409/Zm00001d009520/Zm00001d013052/Zm00001d014361/Zm00001d015249/Zm00001d016506/Zm00001d017085/Zm00001d017767/Zm00001d018155/Zm00001d018156/Zm00001d021731/Zm00001d022230/Zm00001d025003/Zm00001d025547/Zm00001d025989/Zm00001d026064/Zm00001d027484/Zm00001d028152/Zm00001d028731/Zm00001d028980/Zm00001d030121/Zm00001d0…	-/-/-/-/-/-/-/-/-/-/-/-/-/-/-/-/-/-/-/Aux/IAA-transcription factor 43/-/-/-/-/-/roothairless6/-/-/-/-/-/-/-/-/-/-/-/-/-/-/-/-/-/-/-/-/-/-/-/-/-	51
BP	GO:0043624	cellular protein complex disassembly	22/3483	100/22306	0.0567235	0.310618	Zm00001d006372/Zm00001d007692/Zm00001d007940/Zm00001d012966/Zm00001d013141/Zm00001d014368/Zm00001d018330/Zm00001d022042/Zm00001d025100/Zm00001d026621/Zm00001d029343/Zm00001d032598/Zm00001d034239/Zm00001d034575/Zm00001d035051/Zm00001d037497/Zm00001d041647/Zm00001d042097/Zm00001d047534/Zm00001d048717/Zm00001d049694/Zm00001d049982	actin depolymerizing factor2/-/-/-/-/-/-/eukaryotic translation initiation factor 5A/-/-/-/-/-/-/-/-/-/-/-/-/-/-	22
BP	GO:0001666	response to hypoxia	4/3483	10/22306	0.0567626	0.310618	Zm00001d001924/Zm00001d017809/Zm00001d046472/Zm00001d051609	-/-/-/-	4
BP	GO:0006517	protein deglycosylation	4/3483	10/22306	0.0567626	0.310618	Zm00001d007383/Zm00001d030282/Zm00001d037272/Zm00001d044759	-/-/-/-	4
BP	GO:0009083	branched-chain amino acid catabolic process	4/3483	10/22306	0.0567626	0.310618	Zm00001d007892/Zm00001d019054/Zm00001d032455/Zm00001d052444	-/-/-/-	4
BP	GO:0010452	histone H3-K36 methylation	4/3483	10/22306	0.0567626	0.310618	Zm00001d005563/Zm00001d016804/Zm00001d020038/Zm00001d048691	sdg110b/-/set domain gene110a/-	4
BP	GO:0016094	polyprenol biosynthetic process	4/3483	10/22306	0.0567626	0.310618	Zm00001d012312/Zm00001d026064/Zm00001d028152/Zm00001d045159	-/-/-/-	4
BP	GO:0031348	negative regulation of defense response	4/3483	10/22306	0.0567626	0.310618	Zm00001d007938/Zm00001d018243/Zm00001d038097/Zm00001d044273	-/-/-/-	4
BP	GO:0031425	chloroplast RNA processing	4/3483	10/22306	0.0567626	0.310618	Zm00001d021716/Zm00001d021871/Zm00001d025656/Zm00001d039873	chloroplast RNA processing1/-/-/-	4
BP	GO:0033120	positive regulation of RNA splicing	4/3483	10/22306	0.0567626	0.310618	Zm00001d014812/Zm00001d039417/Zm00001d047847/Zm00001d050245	-/-/-/-	4
BP	GO:0033314	mitotic DNA replication checkpoint	4/3483	10/22306	0.0567626	0.310618	Zm00001d004709/Zm00001d042810/Zm00001d045080/Zm00001d047873	-/-/origin recognition complex1/-	4
BP	GO:0042793	plastid transcription	4/3483	10/22306	0.0567626	0.310618	Zm00001d009723/Zm00001d011680/Zm00001d033181/Zm00001d034962	plastid transcriptionally active14/p15 (PC4 Sub1)-transcription factor 3/-/embryo specific2	4
BP	GO:0048026	positive regulation of mRNA splicing, via spliceosome	4/3483	10/22306	0.0567626	0.310618	Zm00001d014812/Zm00001d039417/Zm00001d047847/Zm00001d050245	-/-/-/-	4
BP	GO:0050685	positive regulation of mRNA processing	4/3483	10/22306	0.0567626	0.310618	Zm00001d014812/Zm00001d039417/Zm00001d047847/Zm00001d050245	-/-/-/-	4
BP	GO:0051607	defense response to virus	4/3483	10/22306	0.0567626	0.310618	Zm00001d025830/Zm00001d027412/Zm00001d043194/Zm00001d045944	dicer-like4/dicer-like 101/-/-	4
BP	GO:0072531	pyrimidine-containing compound transmembrane transport	4/3483	10/22306	0.0567626	0.310618	Zm00001d012307/Zm00001d030868/Zm00001d035214/Zm00001d042213	-/-/GRMZM2G055238/thiamine diphosphate carrier protein2	4
BP	GO:0009117	nucleotide metabolic process	91/3483	498/22306	0.0580429	0.316824	Zm00001d001970/Zm00001d002003/Zm00001d003083/Zm00001d005144/Zm00001d005925/Zm00001d006107/Zm00001d006185/Zm00001d006221/Zm00001d007318/Zm00001d008320/Zm00001d008417/Zm00001d011750/Zm00001d011835/Zm00001d011855/Zm00001d013389/Zm00001d014030/Zm00001d014772/Zm00001d014778/Zm00001d014912/Zm00001d015115/Zm00001d015427/Zm00001d015484/Zm00001d017119/Zm00001d018758/Zm00001d020204/Zm00001d020309/Zm00001d0…	-/-/-/-/-/pyruvate dehydrogenase3/-/triose phosphate isomerase2/-/-/-/-/-/-/-/-/-/-/protein disulfide isomerase4/-/-/-/-/succinate dehydrogenase1/-/-/-/-/-/-/-/-/-/-/iron-sulfur protein1/viviparous10/-/adenylosuccinate synthetase/-/-/-/-/-/pyruvate kinase1/-/-/-/malate dehydrogenase4/-/-/-/-/-/phosphofructose kinase1/-/-/-/hexokinase2/-/-/-/-/-/-/-/-/-/-/-/-/hybrid proline-rich protein1/-/-/-/-/-…	91
BP	GO:0000162	tryptophan biosynthetic process	8/3483	28/22306	0.0593202	0.320566	Zm00001d003395/Zm00001d023724/Zm00001d024393/Zm00001d025652/Zm00001d028536/Zm00001d029548/Zm00001d038142/Zm00001d048461	anthranilate synthase homolog1/-/-/-/-/csu323/-/blue fluorescent1	8
BP	GO:0016577	histone demethylation	8/3483	28/22306	0.0593202	0.320566	Zm00001d006580/Zm00001d014900/Zm00001d017700/Zm00001d030108/Zm00001d037313/Zm00001d048404/Zm00001d051849/Zm00001d054070	-/PHD-transcription factor 29/JUMONJI-transcription factor 15/JUMONJI-transcription factor 14/JUMONJI-transcription factor 7/JUMONJI-transcription factor 20/JUMONJI-transcription factor 21/JUMONJI-transcription factor 12	8
BP	GO:0046219	indolalkylamine biosynthetic process	8/3483	28/22306	0.0593202	0.320566	Zm00001d003395/Zm00001d023724/Zm00001d024393/Zm00001d025652/Zm00001d028536/Zm00001d029548/Zm00001d038142/Zm00001d048461	anthranilate synthase homolog1/-/-/-/-/csu323/-/blue fluorescent1	8
BP	GO:0070076	histone lysine demethylation	8/3483	28/22306	0.0593202	0.320566	Zm00001d006580/Zm00001d014900/Zm00001d017700/Zm00001d030108/Zm00001d037313/Zm00001d048404/Zm00001d051849/Zm00001d054070	-/PHD-transcription factor 29/JUMONJI-transcription factor 15/JUMONJI-transcription factor 14/JUMONJI-transcription factor 7/JUMONJI-transcription factor 20/JUMONJI-transcription factor 21/JUMONJI-transcription factor 12	8
BP	GO:0009890	negative regulation of biosynthetic process	68/3483	363/22306	0.0598976	0.322404	Zm00001d002594/Zm00001d004383/Zm00001d004568/Zm00001d004573/Zm00001d006918/Zm00001d007407/Zm00001d007436/Zm00001d008233/Zm00001d008429/Zm00001d008613/Zm00001d009520/Zm00001d011158/Zm00001d012052/Zm00001d012108/Zm00001d012824/Zm00001d013278/Zm00001d013440/Zm00001d013653/Zm00001d014909/Zm00001d014977/Zm00001d015765/Zm00001d016518/Zm00001d017574/Zm00001d017962/Zm00001d018218/Zm00001d018890/Zm00001d0…	OVATE-transcription factor 7/leunig-related6/-/-/-/related to retinoblastoma1/CCAAT-HAP5-transcription factor 58/-/-/-/-/PHD-transcription factor 10/-/-/-/PHD-transcription factor 25/-/-/-/brahma1/-/-/-/-/GNAT-transcription factor 26/-/-/histone acetyltransferase1/-/-/-/-/-/-/-/-/dicer-like 101/-/-/-/methyl binding domain119/retinoblastoma family3/-/-/-/-/PHD-transcription factor 15/-/-/enhancer …	68
BP	GO:0043648	dicarboxylic acid metabolic process	27/3483	128/22306	0.0599579	0.322404	Zm00001d002358/Zm00001d013223/Zm00001d013911/Zm00001d014030/Zm00001d021908/Zm00001d022388/Zm00001d023429/Zm00001d023817/Zm00001d027876/Zm00001d031749/Zm00001d032187/Zm00001d032695/Zm00001d033228/Zm00001d036484/Zm00001d037282/Zm00001d038841/Zm00001d038948/Zm00001d040599/Zm00001d040850/Zm00001d042661/Zm00001d043845/Zm00001d043951/Zm00001d044503/Zm00001d046719/Zm00001d047124/Zm00001d047935/Zm00001d0…	necrotic4/-/-/-/-/ferredoxin-dependent glutamate synthase1/-/-/-/-/-/malate dehydrogenase4/-/-/-/putative aldehyde dehydrogenase MIS1/-/-/-/-/-/-/-/ARID-transcription factor 10/-/-/aspartate kinase-homoserine dehydrogenase1	27
BP	GO:0035335	peptidyl-tyrosine dephosphorylation	9/3483	33/22306	0.0612706	0.326374	Zm00001d004669/Zm00001d004992/Zm00001d005270/Zm00001d031973/Zm00001d033104/Zm00001d033371/Zm00001d038779/Zm00001d041854/Zm00001d049038	-/-/-/-/-/-/-/-/-	9
BP	GO:0045036	protein targeting to chloroplast	9/3483	33/22306	0.0612706	0.326374	Zm00001d003846/Zm00001d003913/Zm00001d006588/Zm00001d012893/Zm00001d021126/Zm00001d025453/Zm00001d032615/Zm00001d033317/Zm00001d052700	-/high chlorophyll fluorescence106/-/-/-/-/-/thylakoid assembly4/-	9
BP	GO:0072596	establishment of protein localization to chloroplast	9/3483	33/22306	0.0612706	0.326374	Zm00001d003846/Zm00001d003913/Zm00001d006588/Zm00001d012893/Zm00001d021126/Zm00001d025453/Zm00001d032615/Zm00001d033317/Zm00001d052700	-/high chlorophyll fluorescence106/-/-/-/-/-/thylakoid assembly4/-	9
BP	GO:0060627	regulation of vesicle-mediated transport	12/3483	48/22306	0.0616168	0.326374	Zm00001d004639/Zm00001d004640/Zm00001d005902/Zm00001d013301/Zm00001d017050/Zm00001d018057/Zm00001d020485/Zm00001d022584/Zm00001d024205/Zm00001d048857/Zm00001d049155/Zm00001d050925	-/-/-/-/-/-/-/-/-/-/-/-	12
BP	GO:0005982	starch metabolic process	10/3483	38/22306	0.062093	0.326374	Zm00001d003817/Zm00001d004438/Zm00001d014150/Zm00001d022206/Zm00001d023792/Zm00001d027309/Zm00001d032333/Zm00001d044693/Zm00001d048349/Zm00001d050645	starch branching enzyme3/pullulanase-type starch debranching enzyme1/-/-/-/-/-/-/-/-	10
BP	GO:0006613	cotranslational protein targeting to membrane	10/3483	38/22306	0.062093	0.326374	Zm00001d000349/Zm00001d001882/Zm00001d003502/Zm00001d004119/Zm00001d027293/Zm00001d037422/Zm00001d042044/Zm00001d043303/Zm00001d048100/Zm00001d052556	-/-/-/-/signal recognition particle receptor homolog1/-/-/-/-/-	10
BP	GO:0006614	SRP-dependent cotranslational protein targeting to membrane	10/3483	38/22306	0.062093	0.326374	Zm00001d000349/Zm00001d001882/Zm00001d003502/Zm00001d004119/Zm00001d027293/Zm00001d037422/Zm00001d042044/Zm00001d043303/Zm00001d048100/Zm00001d052556	-/-/-/-/signal recognition particle receptor homolog1/-/-/-/-/-	10
BP	GO:0098732	macromolecule deacylation	10/3483	38/22306	0.062093	0.326374	Zm00001d004383/Zm00001d006789/Zm00001d008429/Zm00001d010206/Zm00001d025048/Zm00001d025705/Zm00001d027267/Zm00001d040123/Zm00001d046388/Zm00001d050244	leunig-related6/-/-/-/-/-/-/-/-/-	10
BP	GO:1902850	microtubule cytoskeleton organization involved in mitosis	11/3483	43/22306	0.0621308	0.326374	Zm00001d005269/Zm00001d009780/Zm00001d014124/Zm00001d018009/Zm00001d019670/Zm00001d022114/Zm00001d025793/Zm00001d027707/Zm00001d034166/Zm00001d034680/Zm00001d048104	-/gamma-tubulin1/-/-/-/-/-/-/-/-/-	11
BP	GO:0048285	organelle fission	60/3483	317/22306	0.0622023	0.326374	Zm00001d002056/Zm00001d002662/Zm00001d003151/Zm00001d003274/Zm00001d006499/Zm00001d007233/Zm00001d007585/Zm00001d007943/Zm00001d008970/Zm00001d009504/Zm00001d009780/Zm00001d010567/Zm00001d010656/Zm00001d012027/Zm00001d012560/Zm00001d014913/Zm00001d017979/Zm00001d018657/Zm00001d019343/Zm00001d019789/Zm00001d021635/Zm00001d022114/Zm00001d023279/Zm00001d023760/Zm00001d023839/Zm00001d024953/Zm00001d0…	-/cyclin8/-/-/-/-/-/-/-/-/gamma-tubulin1/-/cyclin1/-/cyclin7/-/-/-/GNAT-transcription factor 32/-/-/-/-/chitin synthase homolog1/-/-/-/-/-/-/-/-/-/-/-/-/-/-/-/-/-/-/-/-/-/-/-/centromere protein C 1/-/-/-/-/-/-/-/-/-/-/-/-	60
BP	GO:0014070	response to organic cyclic compound	26/3483	123/22306	0.062586	0.327594	Zm00001d012824/Zm00001d013680/Zm00001d014705/Zm00001d014977/Zm00001d017139/Zm00001d017962/Zm00001d018369/Zm00001d018863/Zm00001d020011/Zm00001d025830/Zm00001d027412/Zm00001d027523/Zm00001d029133/Zm00001d030021/Zm00001d033217/Zm00001d033228/Zm00001d033383/Zm00001d037110/Zm00001d037971/Zm00001d039439/Zm00001d041307/Zm00001d042661/Zm00001d043861/Zm00001d045944/Zm00001d048345/Zm00001d052423	-/-/C3H-transcription factor 329/brahma1/hydroxymethylbutenyl diphosphate synthase1/-/-/hua enhancer1/-/dicer-like4/dicer-like 101/-/-/-/-/-/hydroxymethylpyrimidine phosphate synthase1/-/FHA-transcription factor 15/BZR-transcription factor 2/-/-/-/-/-/-	26
BP	GO:0036293	response to decreased oxygen levels	6/3483	19/22306	0.0633148	0.329025	Zm00001d001924/Zm00001d014679/Zm00001d017809/Zm00001d041682/Zm00001d046472/Zm00001d051609	-/acidic ribosomal protein P3/-/eucaryotic initiation factor6/-/-	6
BP	GO:0042726	flavin-containing compound metabolic process	6/3483	19/22306	0.0633148	0.329025	Zm00001d008320/Zm00001d026476/Zm00001d034493/Zm00001d037045/Zm00001d045944/Zm00001d050844	-/-/-/-/-/-	6
BP	GO:0070482	response to oxygen levels	6/3483	19/22306	0.0633148	0.329025	Zm00001d001924/Zm00001d014679/Zm00001d017809/Zm00001d041682/Zm00001d046472/Zm00001d051609	-/acidic ribosomal protein P3/-/eucaryotic initiation factor6/-/-	6
BP	GO:0045017	glycerolipid biosynthetic process	27/3483	129/22306	0.0649737	0.336837	Zm00001d007638/Zm00001d012034/Zm00001d012118/Zm00001d012701/Zm00001d016990/Zm00001d017654/Zm00001d018013/Zm00001d027485/Zm00001d028261/Zm00001d028698/Zm00001d028731/Zm00001d029333/Zm00001d035030/Zm00001d036055/Zm00001d036631/Zm00001d037760/Zm00001d037946/Zm00001d038891/Zm00001d043401/Zm00001d043842/Zm00001d044307/Zm00001d044554/Zm00001d046972/Zm00001d047760/Zm00001d048049/Zm00001d048258/Zm00001d0…	phospholipid synthesis1/-/-/-/-/-/-/-/-/-/-/-/-/-/-/-/phospholipase D13/-/-/-/-/-/-/-/-/-/-	27
BP	GO:0032879	regulation of localization	25/3483	118/22306	0.0653341	0.337897	Zm00001d004639/Zm00001d004640/Zm00001d005902/Zm00001d007229/Zm00001d007943/Zm00001d013301/Zm00001d014297/Zm00001d014913/Zm00001d017050/Zm00001d018057/Zm00001d018557/Zm00001d018657/Zm00001d020175/Zm00001d020485/Zm00001d022584/Zm00001d024205/Zm00001d032353/Zm00001d032575/Zm00001d033792/Zm00001d034914/Zm00001d035889/Zm00001d048857/Zm00001d049155/Zm00001d050925/Zm00001d054076	-/-/-/-/-/-/histidine kinase3/-/-/-/-/-/-/-/-/-/blue-light receptor phototropin 2/-/-/-/-/-/-/-/-	25
BP	GO:0031124	mRNA 3'-end processing	14/3483	59/22306	0.0672903	0.347186	Zm00001d004154/Zm00001d005012/Zm00001d013599/Zm00001d022535/Zm00001d025673/Zm00001d027515/Zm00001d036977/Zm00001d042291/Zm00001d044552/Zm00001d044657/Zm00001d046255/Zm00001d052407/Zm00001d052888/Zm00001d053559	-/-/-/-/-/-/-/-/-/-/-/-/-/-	14
BP	GO:0006626	protein targeting to mitochondrion	22/3483	102/22306	0.0681081	0.347792	Zm00001d003846/Zm00001d004051/Zm00001d005373/Zm00001d006107/Zm00001d012017/Zm00001d012930/Zm00001d014090/Zm00001d014516/Zm00001d015837/Zm00001d017847/Zm00001d023220/Zm00001d027672/Zm00001d027699/Zm00001d028485/Zm00001d028971/Zm00001d038776/Zm00001d042329/Zm00001d048102/Zm00001d048506/Zm00001d050123/Zm00001d053664/Zm00001d054089	-/-/-/pyruvate dehydrogenase3/-/-/chaperonin 1/-/-/-/-/-/-/-/-/-/-/-/-/-/-/-	22
BP	GO:0043574	peroxisomal transport	7/3483	24/22306	0.0684555	0.347792	Zm00001d002462/Zm00001d006214/Zm00001d021301/Zm00001d032773/Zm00001d034358/Zm00001d039111/Zm00001d052851	-/-/LON peptidase1/-/-/-/-	7
BP	GO:0071985	multivesicular body sorting pathway	7/3483	24/22306	0.0684555	0.347792	Zm00001d012618/Zm00001d032710/Zm00001d043112/Zm00001d043269/Zm00001d043997/Zm00001d048239/Zm00001d048616	-/-/-/-/-/-/-	7
BP	GO:1902476	chloride transmembrane transport	7/3483	24/22306	0.0684555	0.347792	Zm00001d016855/Zm00001d017868/Zm00001d031318/Zm00001d033597/Zm00001d037970/Zm00001d043721/Zm00001d051103	-/-/-/-/-/-/-	7
BP	GO:0045944	positive regulation of transcription by RNA polymerase II	67/3483	360/22306	0.0684558	0.347792	Zm00001d003958/Zm00001d005573/Zm00001d006578/Zm00001d006759/Zm00001d006798/Zm00001d006918/Zm00001d007436/Zm00001d007943/Zm00001d009791/Zm00001d011158/Zm00001d011187/Zm00001d011680/Zm00001d012749/Zm00001d013073/Zm00001d013371/Zm00001d014286/Zm00001d014337/Zm00001d014909/Zm00001d014977/Zm00001d015886/Zm00001d016439/Zm00001d016674/Zm00001d016846/Zm00001d017392/Zm00001d018142/Zm00001d018657/Zm00001d0…	CAMTA-transcription factor 1/-/bHLH-transcription factor 80/-/-/-/CCAAT-HAP5-transcription factor 58/-/-/PHD-transcription factor 10/bHLH-transcription factor 92/p15 (PC4 Sub1)-transcription factor 3/heat shock transcription factor2/bHLH-transcription factor 159/-/-/-/-/brahma1/-/-/HSF-transcription factor 6/-/-/MADS-transcription factor 73/-/-/-/-/-/Zea mays MADS7/-/CAMTA-transcription factor 2/…	67
BP	GO:0009657	plastid organization	34/3483	169/22306	0.068606	0.347792	Zm00001d002951/Zm00001d006588/Zm00001d006700/Zm00001d008970/Zm00001d009723/Zm00001d011716/Zm00001d012861/Zm00001d013195/Zm00001d015837/Zm00001d016036/Zm00001d018124/Zm00001d018756/Zm00001d021716/Zm00001d023760/Zm00001d025453/Zm00001d027230/Zm00001d028901/Zm00001d030149/Zm00001d032615/Zm00001d033181/Zm00001d034082/Zm00001d034823/Zm00001d034962/Zm00001d035051/Zm00001d038097/Zm00001d039852/Zm00001d0…	-/-/mTERF-domain protein9/-/plastid transcriptionally active14/-/-/-/-/-/mTERF domain protein21/mTERF-domain protein24/chloroplast RNA processing1/chitin synthase homolog1/-/-/high chlorophyll fluorescence3/-/-/-/-/-/embryo specific2/-/-/-/-/-/-/-/-/-/-/-	34
BP	GO:0008219	cell death	13/3483	54/22306	0.0689968	0.347792	Zm00001d006350/Zm00001d010811/Zm00001d015703/Zm00001d015704/Zm00001d016615/Zm00001d017809/Zm00001d021347/Zm00001d021498/Zm00001d021524/Zm00001d038097/Zm00001d043462/Zm00001d051609/Zm00001d053286	-/-/-/-/-/-/-/-/-/-/-/-/-	13
BP	GO:0022603	regulation of anatomical structure morphogenesis	13/3483	54/22306	0.0689968	0.347792	Zm00001d004639/Zm00001d004640/Zm00001d005902/Zm00001d008654/Zm00001d009520/Zm00001d013301/Zm00001d018004/Zm00001d028818/Zm00001d043423/Zm00001d044802/Zm00001d045944/Zm00001d049155/Zm00001d052273	-/-/-/-/-/-/Rho-related protein from plants 1/defective kernel1/-/Rho-related protein from plants 5/-/-/Rho-related protein from plants 8	13
BP	GO:0070816	phosphorylation of RNA polymerase II C-terminal domain	13/3483	54/22306	0.0689968	0.347792	Zm00001d006759/Zm00001d009791/Zm00001d013371/Zm00001d016846/Zm00001d017392/Zm00001d019681/Zm00001d020158/Zm00001d026030/Zm00001d027790/Zm00001d035050/Zm00001d036620/Zm00001d049563/Zm00001d051291	-/-/-/-/-/-/-/-/-/-/-/BSD-transcription factor 3/-	13
BP	GO:0012501	programmed cell death	12/3483	49/22306	0.0704798	0.347792	Zm00001d006350/Zm00001d010811/Zm00001d015703/Zm00001d015704/Zm00001d017809/Zm00001d021347/Zm00001d021498/Zm00001d021524/Zm00001d038097/Zm00001d043462/Zm00001d051609/Zm00001d053286	-/-/-/-/-/-/-/-/-/-/-/-	12
BP	GO:0051258	protein polymerization	16/3483	70/22306	0.0708625	0.347792	Zm00001d007806/Zm00001d009780/Zm00001d012525/Zm00001d017106/Zm00001d018004/Zm00001d018484/Zm00001d022114/Zm00001d025793/Zm00001d029343/Zm00001d033414/Zm00001d034680/Zm00001d035183/Zm00001d043093/Zm00001d044802/Zm00001d045323/Zm00001d052273	-/gamma-tubulin1/-/-/Rho-related protein from plants 1/-/-/-/-/-/-/reaction to X. oryzae1/-/Rho-related protein from plants 5/double B-box zinc finger protein11/Rho-related protein from plants 8	16
BP	GO:0051493	regulation of cytoskeleton organization	16/3483	70/22306	0.0708625	0.347792	Zm00001d005269/Zm00001d007806/Zm00001d017106/Zm00001d018004/Zm00001d018484/Zm00001d018535/Zm00001d021504/Zm00001d029343/Zm00001d033414/Zm00001d035183/Zm00001d037497/Zm00001d042097/Zm00001d044802/Zm00001d045323/Zm00001d048104/Zm00001d052273	-/-/-/Rho-related protein from plants 1/-/brick1/-/-/-/reaction to X. oryzae1/-/-/Rho-related protein from plants 5/double B-box zinc finger protein11/-/Rho-related protein from plants 8	16
BP	GO:0000209	protein polyubiquitination	21/3483	97/22306	0.071015	0.347792	Zm00001d000390/Zm00001d003207/Zm00001d006011/Zm00001d013540/Zm00001d016142/Zm00001d021498/Zm00001d025750/Zm00001d028285/Zm00001d028915/Zm00001d029561/Zm00001d031178/Zm00001d033744/Zm00001d037979/Zm00001d037981/Zm00001d038995/Zm00001d044551/Zm00001d045049/Zm00001d045133/Zm00001d047306/Zm00001d050090/Zm00001d053985	-/-/-/-/-/-/-/-/-/-/-/ubiquitin conjugating enzyme5/-/-/-/-/ubiquitin conjugating enzyme2/-/-/-/-	21
BP	GO:0048284	organelle fusion	21/3483	97/22306	0.071015	0.347792	Zm00001d002148/Zm00001d005170/Zm00001d006916/Zm00001d006939/Zm00001d010522/Zm00001d011213/Zm00001d012824/Zm00001d019091/Zm00001d020485/Zm00001d022199/Zm00001d024205/Zm00001d027808/Zm00001d028238/Zm00001d031942/Zm00001d033488/Zm00001d034505/Zm00001d038973/Zm00001d040116/Zm00001d041693/Zm00001d042018/Zm00001d048147	-/-/-/-/-/-/-/-/-/-/-/-/-/-/-/-/-/-/-/-/-	21
BP	GO:0006486	protein glycosylation	39/3483	198/22306	0.071079	0.347792	Zm00001d002944/Zm00001d003878/Zm00001d005248/Zm00001d007764/Zm00001d009409/Zm00001d009520/Zm00001d013052/Zm00001d014361/Zm00001d015249/Zm00001d016506/Zm00001d017085/Zm00001d017767/Zm00001d025989/Zm00001d026064/Zm00001d027484/Zm00001d028152/Zm00001d028731/Zm00001d028980/Zm00001d032267/Zm00001d032400/Zm00001d034659/Zm00001d038804/Zm00001d039675/Zm00001d040435/Zm00001d040724/Zm00001d041504/Zm00001d0…	-/-/-/-/-/-/-/-/-/-/-/-/Aux/IAA-transcription factor 43/-/-/-/-/-/-/-/-/-/-/-/-/-/-/-/-/-/-/-/-/-/-/-/-/-/-	39
BP	GO:0043413	macromolecule glycosylation	39/3483	198/22306	0.071079	0.347792	Zm00001d002944/Zm00001d003878/Zm00001d005248/Zm00001d007764/Zm00001d009409/Zm00001d009520/Zm00001d013052/Zm00001d014361/Zm00001d015249/Zm00001d016506/Zm00001d017085/Zm00001d017767/Zm00001d025989/Zm00001d026064/Zm00001d027484/Zm00001d028152/Zm00001d028731/Zm00001d028980/Zm00001d032267/Zm00001d032400/Zm00001d034659/Zm00001d038804/Zm00001d039675/Zm00001d040435/Zm00001d040724/Zm00001d041504/Zm00001d0…	-/-/-/-/-/-/-/-/-/-/-/-/Aux/IAA-transcription factor 43/-/-/-/-/-/-/-/-/-/-/-/-/-/-/-/-/-/-/-/-/-/-/-/-/-/-	39
BP	GO:0008608	attachment of spindle microtubules to kinetochore	5/3483	15/22306	0.0712597	0.347792	Zm00001d002056/Zm00001d024953/Zm00001d042639/Zm00001d044220/Zm00001d045354	-/-/-/centromere protein C 1/-	5
BP	GO:0010224	response to UV-B	5/3483	15/22306	0.0712597	0.347792	Zm00001d014568/Zm00001d014990/Zm00001d031908/Zm00001d039903/Zm00001d042355	-/-/-/-/-	5
BP	GO:0016106	sesquiterpenoid biosynthetic process	5/3483	15/22306	0.0712597	0.347792	Zm00001d025545/Zm00001d028024/Zm00001d028094/Zm00001d033222/Zm00001d034387	zeaxanthin epoxidase2/-/-/viviparous14/aldehyde oxidase1	5
BP	GO:0051260	protein homooligomerization	5/3483	15/22306	0.0712597	0.347792	Zm00001d002690/Zm00001d017195/Zm00001d022324/Zm00001d027511/Zm00001d027936	plasma membrane intrinsic protein1/-/-/catalase2/viviparous5	5
BP	GO:0051303	establishment of chromosome localization	5/3483	15/22306	0.0712597	0.347792	Zm00001d002056/Zm00001d024953/Zm00001d042639/Zm00001d044220/Zm00001d045354	-/-/-/centromere protein C 1/-	5
BP	GO:0051310	metaphase plate congression	5/3483	15/22306	0.0712597	0.347792	Zm00001d002056/Zm00001d024953/Zm00001d042639/Zm00001d044220/Zm00001d045354	-/-/-/centromere protein C 1/-	5
BP	GO:0098659	inorganic cation import across plasma membrane	5/3483	15/22306	0.0712597	0.347792	Zm00001d020892/Zm00001d021844/Zm00001d022504/Zm00001d028330/Zm00001d037970	-/-/-/-/-	5
BP	GO:0099587	inorganic ion import across plasma membrane	5/3483	15/22306	0.0712597	0.347792	Zm00001d020892/Zm00001d021844/Zm00001d022504/Zm00001d028330/Zm00001d037970	-/-/-/-/-	5
BP	GO:0031669	cellular response to nutrient levels	11/3483	44/22306	0.0716311	0.348037	Zm00001d001865/Zm00001d005064/Zm00001d017966/Zm00001d018902/Zm00001d023230/Zm00001d024239/Zm00001d026335/Zm00001d028360/Zm00001d038389/Zm00001d048835/Zm00001d052327	cytokinin response regulator1/-/-/-/-/autophagy8d/autophagy8b/DMAS1/-/-/-	11
BP	GO:0042147	retrograde transport, endosome to Golgi	11/3483	44/22306	0.0716311	0.348037	Zm00001d004396/Zm00001d006433/Zm00001d006939/Zm00001d013059/Zm00001d013314/Zm00001d016049/Zm00001d025044/Zm00001d033488/Zm00001d034492/Zm00001d042451/Zm00001d053371	-/-/-/-/vesicular transport protein1/-/-/-/-/-/-	11
BP	GO:0007031	peroxisome organization	10/3483	39/22306	0.0722961	0.350482	Zm00001d001870/Zm00001d002184/Zm00001d002462/Zm00001d006214/Zm00001d010478/Zm00001d021301/Zm00001d032773/Zm00001d034358/Zm00001d039111/Zm00001d052851	-/-/-/-/-/LON peptidase1/-/-/-/-	10
BP	GO:0006302	double-strand break repair	31/3483	153/22306	0.0732753	0.354436	Zm00001d002154/Zm00001d005812/Zm00001d007227/Zm00001d007943/Zm00001d008259/Zm00001d008614/Zm00001d010567/Zm00001d013757/Zm00001d018287/Zm00001d018657/Zm00001d020001/Zm00001d021122/Zm00001d024094/Zm00001d024953/Zm00001d028757/Zm00001d032418/Zm00001d034859/Zm00001d034894/Zm00001d036531/Zm00001d038871/Zm00001d039132/Zm00001d040389/Zm00001d041083/Zm00001d042302/Zm00001d042505/Zm00001d042640/Zm00001d0…	meiotic recombination protein 11 homolog A/-/-/-/-/-/-/-/-/-/-/-/-/-/-/-/-/-/-/-/-/-/-/-/-/-/-/-/minichromosome maintenance7/-/-	31
BP	GO:0006869	lipid transport	26/3483	125/22306	0.0734756	0.354614	Zm00001d006384/Zm00001d007034/Zm00001d008752/Zm00001d009337/Zm00001d012892/Zm00001d014188/Zm00001d014499/Zm00001d014895/Zm00001d020208/Zm00001d021972/Zm00001d024711/Zm00001d025153/Zm00001d028505/Zm00001d032279/Zm00001d032334/Zm00001d032980/Zm00001d034758/Zm00001d036233/Zm00001d040008/Zm00001d040259/Zm00001d040456/Zm00001d045956/Zm00001d046194/Zm00001d047527/Zm00001d051661/Zm00001d051854	-/-/-/-/-/-/-/-/-/-/-/-/-/-/-/-/-/-/-/-/-/-/-/-/-/-	26
BP	GO:0006732	coenzyme metabolic process	74/3483	403/22306	0.0737488	0.355142	Zm00001d000123/Zm00001d001970/Zm00001d002326/Zm00001d003083/Zm00001d003462/Zm00001d005144/Zm00001d005614/Zm00001d005925/Zm00001d006107/Zm00001d006185/Zm00001d006221/Zm00001d007318/Zm00001d007936/Zm00001d008320/Zm00001d009738/Zm00001d010920/Zm00001d011099/Zm00001d011835/Zm00001d012510/Zm00001d014030/Zm00001d017119/Zm00001d017258/Zm00001d019850/Zm00001d020309/Zm00001d020771/Zm00001d021297/Zm00001d0…	-/-/adenosylmethionine aminotransferase1/-/LIP1/-/-/-/pyruvate dehydrogenase3/-/triose phosphate isomerase2/-/-/-/-/-/-/-/-/-/-/-/-/-/-/-/-/-/-/-/-/viviparous10/-/-/-/-/pyruvate kinase1/-/-/-/-/-/malate dehydrogenase4/-/C2C2-GATA-transcription factor 34/-/-/phosphofructose kinase1/-/-/hexokinase2/-/-/-/-/-/-/-/LIP1P-2/-/-/-/-/bZIP-transcription factor 105/-/-/-/-/brown midrib4/-/-/-/-/small kerne…	74
BP	GO:0010558	negative regulation of macromolecule biosynthetic process	65/3483	350/22306	0.074228	0.356657	Zm00001d002594/Zm00001d004383/Zm00001d004568/Zm00001d004573/Zm00001d006918/Zm00001d007407/Zm00001d007436/Zm00001d008233/Zm00001d008429/Zm00001d009520/Zm00001d011158/Zm00001d012052/Zm00001d012108/Zm00001d012824/Zm00001d013278/Zm00001d013440/Zm00001d013653/Zm00001d014909/Zm00001d014977/Zm00001d015765/Zm00001d016518/Zm00001d017962/Zm00001d018218/Zm00001d018890/Zm00001d019789/Zm00001d020182/Zm00001d0…	OVATE-transcription factor 7/leunig-related6/-/-/-/related to retinoblastoma1/CCAAT-HAP5-transcription factor 58/-/-/-/PHD-transcription factor 10/-/-/-/PHD-transcription factor 25/-/-/-/brahma1/-/-/-/GNAT-transcription factor 26/-/-/histone acetyltransferase1/-/-/-/-/-/-/-/-/dicer-like 101/-/-/-/methyl binding domain119/retinoblastoma family3/-/-/-/-/PHD-transcription factor 15/-/-/enhancer of z…	65
BP	GO:0006839	mitochondrial transport	27/3483	131/22306	0.0758722	0.363247	Zm00001d003846/Zm00001d004051/Zm00001d005373/Zm00001d006107/Zm00001d012017/Zm00001d012629/Zm00001d012930/Zm00001d014090/Zm00001d014516/Zm00001d015837/Zm00001d017847/Zm00001d023220/Zm00001d027672/Zm00001d027699/Zm00001d028485/Zm00001d028971/Zm00001d034520/Zm00001d034521/Zm00001d038776/Zm00001d042329/Zm00001d043834/Zm00001d044459/Zm00001d048102/Zm00001d048506/Zm00001d050123/Zm00001d053664/Zm00001d0…	-/-/-/pyruvate dehydrogenase3/-/-/-/chaperonin 1/-/-/-/-/-/-/-/-/-/-/-/-/-/-/-/-/-/-/-	27
BP	GO:0006497	protein lipidation	21/3483	98/22306	0.0776322	0.363247	Zm00001d002534/Zm00001d006102/Zm00001d012034/Zm00001d012118/Zm00001d016990/Zm00001d017654/Zm00001d022038/Zm00001d026600/Zm00001d027485/Zm00001d028619/Zm00001d029333/Zm00001d036055/Zm00001d038321/Zm00001d043842/Zm00001d044554/Zm00001d044647/Zm00001d047439/Zm00001d047805/Zm00001d049857/Zm00001d051421/Zm00001d053627	-/-/-/-/-/-/-/-/-/-/-/-/-/-/-/-/-/-/-/-/-	21
BP	GO:0042158	lipoprotein biosynthetic process	21/3483	98/22306	0.0776322	0.363247	Zm00001d002534/Zm00001d006102/Zm00001d012034/Zm00001d012118/Zm00001d016990/Zm00001d017654/Zm00001d022038/Zm00001d026600/Zm00001d027485/Zm00001d028619/Zm00001d029333/Zm00001d036055/Zm00001d038321/Zm00001d043842/Zm00001d044554/Zm00001d044647/Zm00001d047439/Zm00001d047805/Zm00001d049857/Zm00001d051421/Zm00001d053627	-/-/-/-/-/-/-/-/-/-/-/-/-/-/-/-/-/-/-/-/-	21
BP	GO:0007167	enzyme linked receptor protein signaling pathway	41/3483	211/22306	0.0778955	0.363247	Zm00001d002026/Zm00001d002905/Zm00001d003072/Zm00001d003212/Zm00001d005450/Zm00001d006627/Zm00001d010421/Zm00001d010971/Zm00001d011450/Zm00001d011700/Zm00001d012625/Zm00001d016928/Zm00001d018059/Zm00001d018472/Zm00001d019515/Zm00001d020068/Zm00001d021136/Zm00001d021829/Zm00001d024430/Zm00001d025920/Zm00001d032868/Zm00001d035476/Zm00001d036300/Zm00001d037811/Zm00001d037829/Zm00001d039176/Zm00001d0…	-/-/-/-/-/-/-/-/-/-/-/somatic embryogenesis receptor-like kinase2/-/-/-/-/-/-/-/-/-/-/-/-/-/-/-/-/-/-/-/-/-/-/-/-/-/-/-/somatic embryogenesis receptor-like kinase3/-	41
BP	GO:0007178	transmembrane receptor protein serine/threonine kinase signaling pathway	41/3483	211/22306	0.0778955	0.363247	Zm00001d002026/Zm00001d002905/Zm00001d003072/Zm00001d003212/Zm00001d005450/Zm00001d006627/Zm00001d010421/Zm00001d010971/Zm00001d011450/Zm00001d011700/Zm00001d012625/Zm00001d016928/Zm00001d018059/Zm00001d018472/Zm00001d019515/Zm00001d020068/Zm00001d021136/Zm00001d021829/Zm00001d024430/Zm00001d025920/Zm00001d032868/Zm00001d035476/Zm00001d036300/Zm00001d037811/Zm00001d037829/Zm00001d039176/Zm00001d0…	-/-/-/-/-/-/-/-/-/-/-/somatic embryogenesis receptor-like kinase2/-/-/-/-/-/-/-/-/-/-/-/-/-/-/-/-/-/-/-/-/-/-/-/-/-/-/-/somatic embryogenesis receptor-like kinase3/-	41
BP	GO:1902903	regulation of supramolecular fiber organization	13/3483	55/22306	0.0779867	0.363247	Zm00001d007806/Zm00001d017106/Zm00001d018004/Zm00001d018484/Zm00001d018535/Zm00001d029343/Zm00001d033414/Zm00001d035183/Zm00001d037497/Zm00001d042097/Zm00001d044802/Zm00001d045323/Zm00001d052273	-/-/Rho-related protein from plants 1/-/brick1/-/-/reaction to X. oryzae1/-/-/Rho-related protein from plants 5/double B-box zinc finger protein11/Rho-related protein from plants 8	13
BP	GO:0048869	cellular developmental process	66/3483	357/22306	0.0780218	0.363247	Zm00001d000361/Zm00001d002144/Zm00001d004639/Zm00001d004640/Zm00001d004993/Zm00001d005107/Zm00001d005902/Zm00001d007158/Zm00001d007407/Zm00001d008654/Zm00001d008743/Zm00001d009452/Zm00001d010927/Zm00001d012212/Zm00001d012544/Zm00001d012824/Zm00001d013301/Zm00001d013389/Zm00001d016452/Zm00001d018004/Zm00001d019881/Zm00001d020970/Zm00001d021641/Zm00001d021863/Zm00001d022016/Zm00001d022259/Zm00001d0…	MYB-transcription factor 115/-/-/-/-/-/-/-/related to retinoblastoma1/-/-/-/-/gibberellin 20-oxidase5/MYB-transcription factor 74/-/-/-/-/Rho-related protein from plants 1/-/dihydroflavonoid reductase1/-/C2C2-YABBY-transcription factor 4/-/MYB-transcription factor 23/brick3/-/-/-/-/MYB-transcription factor 68/-/-/defective kernel1/-/-/-/retinoblastoma family3/MYB-transcription factor 167/-/-/-/-/…	66
BP	GO:0005986	sucrose biosynthetic process	4/3483	11/22306	0.0784904	0.363247	Zm00001d010523/Zm00001d012036/Zm00001d028562/Zm00001d035346	sucrose-phosphatase1/sucrose phosphate synthase1/-/-	4
BP	GO:0031086	nuclear-transcribed mRNA catabolic process, deadenylation-independent decay	4/3483	11/22306	0.0784904	0.363247	Zm00001d017883/Zm00001d019314/Zm00001d051678/Zm00001d052561	-/-/-/-	4
BP	GO:0031087	deadenylation-independent decapping of nuclear-transcribed mRNA	4/3483	11/22306	0.0784904	0.363247	Zm00001d017883/Zm00001d019314/Zm00001d051678/Zm00001d052561	-/-/-/-	4
BP	GO:2000779	regulation of double-strand break repair	4/3483	11/22306	0.0784904	0.363247	Zm00001d013757/Zm00001d041083/Zm00001d042302/Zm00001d044358	-/-/-/-	4
BP	GO:0008154	actin polymerization or depolymerization	16/3483	71/22306	0.0787799	0.363247	Zm00001d006372/Zm00001d007806/Zm00001d012966/Zm00001d013141/Zm00001d013389/Zm00001d017106/Zm00001d018004/Zm00001d018484/Zm00001d018535/Zm00001d029343/Zm00001d035183/Zm00001d037497/Zm00001d042097/Zm00001d044802/Zm00001d045323/Zm00001d052273	actin depolymerizing factor2/-/-/-/-/-/Rho-related protein from plants 1/-/brick1/-/reaction to X. oryzae1/-/-/Rho-related protein from plants 5/double B-box zinc finger protein11/Rho-related protein from plants 8	16
BP	GO:0000076	DNA replication checkpoint	6/3483	20/22306	0.0789522	0.363247	Zm00001d002056/Zm00001d004709/Zm00001d042810/Zm00001d045080/Zm00001d045354/Zm00001d047873	-/-/-/origin recognition complex1/-/-	6
BP	GO:0006616	SRP-dependent cotranslational protein targeting to membrane, translocation	6/3483	20/22306	0.0789522	0.363247	Zm00001d000349/Zm00001d001882/Zm00001d003502/Zm00001d037422/Zm00001d043303/Zm00001d048100	-/-/-/-/-/-	6
BP	GO:0007004	telomere maintenance via telomerase	6/3483	20/22306	0.0789522	0.363247	Zm00001d005502/Zm00001d019920/Zm00001d026612/Zm00001d036531/Zm00001d047427/Zm00001d050612	-/-/-/-/-/-	6
BP	GO:0007007	inner mitochondrial membrane organization	6/3483	20/22306	0.0789522	0.363247	Zm00001d003846/Zm00001d004051/Zm00001d010522/Zm00001d012930/Zm00001d017847/Zm00001d027699	-/-/-/-/-/-	6
BP	GO:0032981	mitochondrial respiratory chain complex I assembly	6/3483	20/22306	0.0789522	0.363247	Zm00001d011750/Zm00001d028485/Zm00001d031975/Zm00001d034244/Zm00001d035879/Zm00001d053084	-/-/-/-/-/-	6
BP	GO:0045737	positive regulation of cyclin-dependent protein serine/threonine kinase activity	6/3483	20/22306	0.0789522	0.363247	Zm00001d017392/Zm00001d019681/Zm00001d020158/Zm00001d026030/Zm00001d027790/Zm00001d051291	-/-/-/-/-/-	6
BP	GO:0051568	histone H3-K4 methylation	6/3483	20/22306	0.0789522	0.363247	Zm00001d004739/Zm00001d006323/Zm00001d023914/Zm00001d042794/Zm00001d044273/Zm00001d048691	-/-/PHD-transcription factor 4/-/-/-	6
BP	GO:1904031	positive regulation of cyclin-dependent protein kinase activity	6/3483	20/22306	0.0789522	0.363247	Zm00001d017392/Zm00001d019681/Zm00001d020158/Zm00001d026030/Zm00001d027790/Zm00001d051291	-/-/-/-/-/-	6
BP	GO:0071897	DNA biosynthetic process	26/3483	126/22306	0.079381	0.364446	Zm00001d003266/Zm00001d005269/Zm00001d005502/Zm00001d014568/Zm00001d015086/Zm00001d016581/Zm00001d019920/Zm00001d023801/Zm00001d024423/Zm00001d024509/Zm00001d024953/Zm00001d026313/Zm00001d026402/Zm00001d026612/Zm00001d027479/Zm00001d031751/Zm00001d032798/Zm00001d036531/Zm00001d039446/Zm00001d042713/Zm00001d043277/Zm00001d043404/Zm00001d047427/Zm00001d047988/Zm00001d050612/Zm00001d053264	-/-/-/-/-/-/-/-/DNA polymerase like1/-/-/-/white seedling2/-/-/-/-/-/-/-/-/-/-/-/-/-	26
BP	GO:0009110	vitamin biosynthetic process	18/3483	82/22306	0.0804254	0.367683	Zm00001d002326/Zm00001d002511/Zm00001d007936/Zm00001d011183/Zm00001d026476/Zm00001d027352/Zm00001d027999/Zm00001d030657/Zm00001d031691/Zm00001d033110/Zm00001d033383/Zm00001d034493/Zm00001d037045/Zm00001d037507/Zm00001d041407/Zm00001d049380/Zm00001d050844/Zm00001d053981	adenosylmethionine aminotransferase1/-/-/thiamine biosynthesis1/-/-/-/-/-/-/hydroxymethylpyrimidine phosphate synthase1/-/-/-/-/-/-/small kernel2	18
BP	GO:0048589	developmental growth	18/3483	82/22306	0.0804254	0.367683	Zm00001d005281/Zm00001d007158/Zm00001d008743/Zm00001d012212/Zm00001d019881/Zm00001d021641/Zm00001d023908/Zm00001d025715/Zm00001d028818/Zm00001d030266/Zm00001d032099/Zm00001d033597/Zm00001d035030/Zm00001d038475/Zm00001d045944/Zm00001d046485/Zm00001d046973/Zm00001d049190	-/-/-/gibberellin 20-oxidase5/-/-/-/-/defective kernel1/-/-/-/-/ribosome export associated1/-/-/-/minichromosome maintenance7	18
BP	GO:0051049	regulation of transport	20/3483	93/22306	0.0810586	0.369798	Zm00001d004639/Zm00001d004640/Zm00001d005902/Zm00001d013301/Zm00001d014297/Zm00001d017050/Zm00001d018057/Zm00001d018557/Zm00001d020175/Zm00001d020485/Zm00001d022584/Zm00001d024205/Zm00001d032353/Zm00001d033792/Zm00001d034914/Zm00001d035889/Zm00001d048857/Zm00001d049155/Zm00001d050925/Zm00001d054076	-/-/-/-/histidine kinase3/-/-/-/-/-/-/-/blue-light receptor phototropin 2/-/-/-/-/-/-/-	20
BP	GO:0048585	negative regulation of response to stimulus	15/3483	66/22306	0.0817521	0.372178	Zm00001d007938/Zm00001d010470/Zm00001d014705/Zm00001d017809/Zm00001d018243/Zm00001d020874/Zm00001d028298/Zm00001d031938/Zm00001d037110/Zm00001d038097/Zm00001d038106/Zm00001d044273/Zm00001d046967/Zm00001d051609/Zm00001d052838	-/-/C3H-transcription factor 329/-/-/CCAAT-HAP5-transcription factor 516/-/-/-/-/-/-/CCAAT-HAP5-transcription factor 57/-/CCAAT-HAP5-transcription factor 514	15
BP	GO:0000280	nuclear division	51/3483	270/22306	0.0821737	0.372966	Zm00001d002056/Zm00001d002662/Zm00001d003151/Zm00001d003274/Zm00001d006499/Zm00001d007233/Zm00001d007585/Zm00001d007943/Zm00001d009780/Zm00001d010567/Zm00001d010656/Zm00001d012560/Zm00001d014913/Zm00001d018657/Zm00001d019343/Zm00001d019789/Zm00001d021635/Zm00001d022114/Zm00001d023279/Zm00001d023839/Zm00001d024953/Zm00001d025789/Zm00001d025793/Zm00001d027588/Zm00001d030094/Zm00001d031847/Zm00001d0…	-/cyclin8/-/-/-/-/-/-/gamma-tubulin1/-/cyclin1/cyclin7/-/-/GNAT-transcription factor 32/-/-/-/-/-/-/-/-/-/-/-/-/-/-/-/-/-/-/-/-/-/-/-/-/-/centromere protein C 1/-/-/-/-/-/-/-/-/-/-	51
BP	GO:0007098	centrosome cycle	7/3483	25/22306	0.0827858	0.372966	Zm00001d007953/Zm00001d012525/Zm00001d015020/Zm00001d028073/Zm00001d037084/Zm00001d043093/Zm00001d048137	-/-/-/-/-/-/-	7
BP	GO:0043248	proteasome assembly	7/3483	25/22306	0.0827858	0.372966	Zm00001d008259/Zm00001d013186/Zm00001d028396/Zm00001d040389/Zm00001d041456/Zm00001d047941/Zm00001d052445	-/-/-/-/-/-/-	7
BP	GO:0045116	protein neddylation	7/3483	25/22306	0.0827858	0.372966	Zm00001d008256/Zm00001d008428/Zm00001d012969/Zm00001d014671/Zm00001d022231/Zm00001d032165/Zm00001d037246	-/-/-/-/-/-/-	7
BP	GO:0090630	activation of GTPase activity	7/3483	25/22306	0.0827858	0.372966	Zm00001d006192/Zm00001d012126/Zm00001d013840/Zm00001d021240/Zm00001d031534/Zm00001d034941/Zm00001d047762	-/-/-/-/-/-/-	7
BP	GO:0009267	cellular response to starvation	10/3483	40/22306	0.0834913	0.373857	Zm00001d001865/Zm00001d005064/Zm00001d018902/Zm00001d023230/Zm00001d024239/Zm00001d026335/Zm00001d028360/Zm00001d038389/Zm00001d048835/Zm00001d052327	cytokinin response regulator1/-/-/-/autophagy8d/autophagy8b/DMAS1/-/-/-	10
BP	GO:0060560	developmental growth involved in morphogenesis	10/3483	40/22306	0.0834913	0.373857	Zm00001d007158/Zm00001d008743/Zm00001d012212/Zm00001d019881/Zm00001d021641/Zm00001d023908/Zm00001d032099/Zm00001d033597/Zm00001d035030/Zm00001d046973	-/-/gibberellin 20-oxidase5/-/-/-/-/-/-/-	10
BP	GO:0015074	DNA integration	8/3483	30/22306	0.084301	0.373857	Zm00001d005269/Zm00001d008233/Zm00001d015086/Zm00001d021241/Zm00001d026621/Zm00001d032798/Zm00001d034018/Zm00001d042939	-/-/-/-/-/-/tousled-like protein kinase1/-	8
BP	GO:0019388	galactose catabolic process	8/3483	30/22306	0.084301	0.373857	Zm00001d002377/Zm00001d013428/Zm00001d018902/Zm00001d026311/Zm00001d032346/Zm00001d033746/Zm00001d034733/Zm00001d035212	-/phosphoglucomutase2/-/-/-/phosphoglucomutase1/-/-	8
BP	GO:0030261	chromosome condensation	9/3483	35/22306	0.0843637	0.373857	Zm00001d006499/Zm00001d007943/Zm00001d013440/Zm00001d014913/Zm00001d018657/Zm00001d021635/Zm00001d023839/Zm00001d032575/Zm00001d044581	-/-/-/-/-/-/-/-/-	9
BP	GO:0031098	stress-activated protein kinase signaling cascade	9/3483	35/22306	0.0843637	0.373857	Zm00001d001978/Zm00001d017525/Zm00001d021584/Zm00001d025449/Zm00001d028514/Zm00001d034055/Zm00001d045967/Zm00001d047728/Zm00001d052147	-/-/-/-/MAP kinase kinase kinase11/-/-/-/-	9
BP	GO:0035601	protein deacylation	9/3483	35/22306	0.0843637	0.373857	Zm00001d004383/Zm00001d006789/Zm00001d008429/Zm00001d010206/Zm00001d025048/Zm00001d025705/Zm00001d040123/Zm00001d046388/Zm00001d050244	leunig-related6/-/-/-/-/-/-/-/-	9
BP	GO:1901068	guanosine-containing compound metabolic process	9/3483	35/22306	0.0843637	0.373857	Zm00001d001970/Zm00001d017897/Zm00001d023833/Zm00001d026515/Zm00001d029095/Zm00001d034320/Zm00001d047506/Zm00001d051545/Zm00001d053984	-/-/-/viviparous10/-/-/-/-/-	9
BP	GO:0006890	retrograde vesicle-mediated transport, Golgi to ER	19/3483	88/22306	0.0846348	0.373977	Zm00001d003460/Zm00001d004543/Zm00001d006433/Zm00001d006939/Zm00001d007067/Zm00001d010537/Zm00001d016183/Zm00001d016402/Zm00001d018057/Zm00001d020783/Zm00001d023943/Zm00001d024933/Zm00001d026283/Zm00001d036443/Zm00001d040178/Zm00001d041785/Zm00001d043052/Zm00001d046973/Zm00001d053609	-/-/-/-/-/-/-/-/-/-/-/-/-/-/-/-/-/-/-	19
BP	GO:0000380	alternative mRNA splicing, via spliceosome	14/3483	61/22306	0.0847359	0.373977	Zm00001d006906/Zm00001d010901/Zm00001d015194/Zm00001d022243/Zm00001d029256/Zm00001d031269/Zm00001d035551/Zm00001d037925/Zm00001d042040/Zm00001d043814/Zm00001d047498/Zm00001d048609/Zm00001d051052/Zm00001d053613	-/-/-/-/-/-/-/-/-/-/-/-/-/-	14
BP	GO:0006643	membrane lipid metabolic process	32/3483	161/22306	0.0858554	0.37738	Zm00001d000228/Zm00001d005431/Zm00001d007302/Zm00001d008389/Zm00001d011503/Zm00001d012034/Zm00001d012108/Zm00001d012118/Zm00001d014445/Zm00001d014446/Zm00001d014809/Zm00001d015477/Zm00001d016926/Zm00001d016990/Zm00001d017574/Zm00001d017654/Zm00001d018042/Zm00001d022043/Zm00001d027445/Zm00001d027485/Zm00001d028534/Zm00001d029333/Zm00001d033149/Zm00001d036055/Zm00001d038389/Zm00001d042802/Zm00001d0…	-/-/-/-/-/-/-/-/-/-/-/-/-/-/-/-/-/-/-/-/-/-/-/-/-/-/-/-/-/-/-/-	32
BP	GO:0008033	tRNA processing	32/3483	161/22306	0.0858554	0.37738	Zm00001d003621/Zm00001d004196/Zm00001d012794/Zm00001d013673/Zm00001d015086/Zm00001d015999/Zm00001d017897/Zm00001d018070/Zm00001d018148/Zm00001d020541/Zm00001d020978/Zm00001d021241/Zm00001d021624/Zm00001d022045/Zm00001d023564/Zm00001d024463/Zm00001d025919/Zm00001d027872/Zm00001d028098/Zm00001d028596/Zm00001d028597/Zm00001d029077/Zm00001d036657/Zm00001d037290/Zm00001d038036/Zm00001d038440/Zm00001d0…	-/-/-/-/-/-/-/-/-/-/-/-/-/-/-/-/-/-/-/-/-/-/-/-/-/-/-/-/-/-/-/-	32
BP	GO:0019725	cellular homeostasis	70/3483	383/22306	0.086267	0.378422	Zm00001d002006/Zm00001d002022/Zm00001d002603/Zm00001d002854/Zm00001d003654/Zm00001d004136/Zm00001d004977/Zm00001d007229/Zm00001d008736/Zm00001d008911/Zm00001d008930/Zm00001d010324/Zm00001d011543/Zm00001d012446/Zm00001d013061/Zm00001d013985/Zm00001d014327/Zm00001d014912/Zm00001d015747/Zm00001d017379/Zm00001d017417/Zm00001d017427/Zm00001d017574/Zm00001d018238/Zm00001d018454/Zm00001d018827/Zm00001d0…	plasma-membrane H+ATPase2/calcium exchanger2/-/-/protein disulfide isomerase10/-/-/-/-/-/-/-/-/-/-/-/-/protein disulfide isomerase4/-/-/-/-/-/-/-/-/-/-/-/-/-/thioredoxin M1/-/-/catalase2/-/-/protein disulfide isomerase9/-/-/-/-/-/-/methyl binding domain115/C2C2-GATA-transcription factor 34/glutathione transporter1/-/-/-/-/protein disulfide isomerase7/-/-/thioredoxin h homolog1/hexokinase2/-/-/rot…	70
BP	GO:0006367	transcription initiation from RNA polymerase II promoter	16/3483	72/22306	0.0872527	0.3793	Zm00001d002366/Zm00001d011680/Zm00001d014255/Zm00001d014337/Zm00001d015886/Zm00001d016439/Zm00001d022141/Zm00001d029473/Zm00001d030573/Zm00001d037807/Zm00001d039729/Zm00001d046539/Zm00001d046579/Zm00001d047898/Zm00001d050616/Zm00001d053616	-/p15 (PC4 Sub1)-transcription factor 3/-/-/-/-/-/-/-/-/-/-/-/-/-/-	16
BP	GO:0006661	phosphatidylinositol biosynthetic process	16/3483	72/22306	0.0872527	0.3793	Zm00001d012034/Zm00001d012118/Zm00001d016990/Zm00001d017654/Zm00001d027485/Zm00001d028261/Zm00001d029333/Zm00001d035030/Zm00001d036055/Zm00001d036631/Zm00001d043842/Zm00001d044554/Zm00001d046972/Zm00001d048049/Zm00001d048258/Zm00001d053627	-/-/-/-/-/-/-/-/-/-/-/-/-/-/-/-	16
BP	GO:0009555	pollen development	16/3483	72/22306	0.0872527	0.3793	Zm00001d005269/Zm00001d006168/Zm00001d010567/Zm00001d012510/Zm00001d015134/Zm00001d015249/Zm00001d016452/Zm00001d020970/Zm00001d023839/Zm00001d030266/Zm00001d033368/Zm00001d033454/Zm00001d038973/Zm00001d044358/Zm00001d048337/Zm00001d053930	-/-/-/-/-/-/-/dihydroflavonoid reductase1/-/-/-/GRMZM2G039373/-/-/-/-	16
BP	GO:0048278	vesicle docking	16/3483	72/22306	0.0872527	0.3793	Zm00001d002148/Zm00001d004159/Zm00001d007760/Zm00001d013049/Zm00001d015890/Zm00001d019104/Zm00001d021828/Zm00001d022502/Zm00001d024205/Zm00001d025398/Zm00001d039196/Zm00001d041138/Zm00001d041693/Zm00001d042018/Zm00001d048147/Zm00001d049522	-/-/-/-/-/-/-/-/-/-/-/-/-/-/-/-	16
BP	GO:0032147	activation of protein kinase activity	13/3483	56/22306	0.0876922	0.3793	Zm00001d001978/Zm00001d017525/Zm00001d021584/Zm00001d025449/Zm00001d028514/Zm00001d034055/Zm00001d035087/Zm00001d045359/Zm00001d045967/Zm00001d047728/Zm00001d048104/Zm00001d051307/Zm00001d052147	-/-/-/-/MAP kinase kinase kinase11/-/acidic ribosomal protein P1a/-/-/-/-/autophagy13a/-	13
BP	GO:0045930	negative regulation of mitotic cell cycle	13/3483	56/22306	0.0876922	0.3793	Zm00001d002154/Zm00001d004709/Zm00001d007407/Zm00001d007585/Zm00001d018057/Zm00001d023279/Zm00001d031678/Zm00001d042639/Zm00001d042810/Zm00001d044630/Zm00001d045080/Zm00001d047873/Zm00001d052695	meiotic recombination protein 11 homolog A/-/related to retinoblastoma1/-/-/-/retinoblastoma family3/-/-/-/origin recognition complex1/-/-	13
BP	GO:0046835	carbohydrate phosphorylation	13/3483	56/22306	0.0876922	0.3793	Zm00001d001974/Zm00001d002377/Zm00001d011526/Zm00001d023792/Zm00001d026514/Zm00001d028762/Zm00001d033181/Zm00001d033927/Zm00001d034733/Zm00001d037278/Zm00001d038792/Zm00001d042536/Zm00001d053886	-/-/-/-/-/-/-/-/-/phosphofructose kinase1/hexokinase2/fructokinase1/-	13
BP	GO:0046474	glycerophospholipid biosynthetic process	25/3483	122/22306	0.0896397	0.386688	Zm00001d007638/Zm00001d012034/Zm00001d012118/Zm00001d012701/Zm00001d016990/Zm00001d017654/Zm00001d018013/Zm00001d027485/Zm00001d028261/Zm00001d028698/Zm00001d029333/Zm00001d035030/Zm00001d036055/Zm00001d036631/Zm00001d037946/Zm00001d038891/Zm00001d043401/Zm00001d043842/Zm00001d044307/Zm00001d044554/Zm00001d046972/Zm00001d047760/Zm00001d048049/Zm00001d048258/Zm00001d053627	phospholipid synthesis1/-/-/-/-/-/-/-/-/-/-/-/-/-/phospholipase D13/-/-/-/-/-/-/-/-/-/-	25
BP	GO:1901698	response to nitrogen compound	44/3483	231/22306	0.0902855	0.386688	Zm00001d000390/Zm00001d001865/Zm00001d001962/Zm00001d002856/Zm00001d005064/Zm00001d010454/Zm00001d012643/Zm00001d012824/Zm00001d014124/Zm00001d014976/Zm00001d014977/Zm00001d016142/Zm00001d016982/Zm00001d017962/Zm00001d017997/Zm00001d018863/Zm00001d019287/Zm00001d020011/Zm00001d021498/Zm00001d022598/Zm00001d023230/Zm00001d025830/Zm00001d027412/Zm00001d027707/Zm00001d029133/Zm00001d029561/Zm00001d0…	-/cytokinin response regulator1/-/-/-/-/-/-/-/-/brahma1/-/-/-/-/hua enhancer1/-/-/-/-/-/dicer-like4/dicer-like 101/-/-/-/pyruvate kinase1/-/hydroxymethylpyrimidine phosphate synthase1/-/-/-/FHA-transcription factor 15/-/-/-/ubiquitin conjugating enzyme2/-/-/-/-/-/-/-	44
BP	GO:0031668	cellular response to extracellular stimulus	12/3483	51/22306	0.0905644	0.386688	Zm00001d001865/Zm00001d005064/Zm00001d010974/Zm00001d017966/Zm00001d018902/Zm00001d023230/Zm00001d024239/Zm00001d026335/Zm00001d028360/Zm00001d038389/Zm00001d048835/Zm00001d052327	cytokinin response regulator1/-/PHD-transcription factor 17/-/-/-/autophagy8d/autophagy8b/DMAS1/-/-/-	12
BP	GO:0071496	cellular response to external stimulus	12/3483	51/22306	0.0905644	0.386688	Zm00001d001865/Zm00001d005064/Zm00001d010974/Zm00001d017966/Zm00001d018902/Zm00001d023230/Zm00001d024239/Zm00001d026335/Zm00001d028360/Zm00001d038389/Zm00001d048835/Zm00001d052327	cytokinin response regulator1/-/PHD-transcription factor 17/-/-/-/autophagy8d/autophagy8b/DMAS1/-/-/-	12
BP	GO:0000075	cell cycle checkpoint	15/3483	67/22306	0.0908103	0.386688	Zm00001d002056/Zm00001d002154/Zm00001d004709/Zm00001d007585/Zm00001d018057/Zm00001d023279/Zm00001d024953/Zm00001d036531/Zm00001d040166/Zm00001d042639/Zm00001d042810/Zm00001d044630/Zm00001d045080/Zm00001d045354/Zm00001d047873	-/meiotic recombination protein 11 homolog A/-/-/-/-/-/-/-/-/-/-/origin recognition complex1/-/-	15
BP	GO:0006915	apoptotic process	5/3483	16/22306	0.0908279	0.386688	Zm00001d006350/Zm00001d010811/Zm00001d017809/Zm00001d021347/Zm00001d051609	-/-/-/-/-	5
BP	GO:0034720	histone H3-K4 demethylation	5/3483	16/22306	0.0908279	0.386688	Zm00001d014900/Zm00001d017700/Zm00001d030108/Zm00001d037313/Zm00001d048404	PHD-transcription factor 29/JUMONJI-transcription factor 15/JUMONJI-transcription factor 14/JUMONJI-transcription factor 7/JUMONJI-transcription factor 20	5
BP	GO:0034721	histone H3-K4 demethylation, trimethyl-H3-K4-specific	5/3483	16/22306	0.0908279	0.386688	Zm00001d014900/Zm00001d017700/Zm00001d030108/Zm00001d037313/Zm00001d048404	PHD-transcription factor 29/JUMONJI-transcription factor 15/JUMONJI-transcription factor 14/JUMONJI-transcription factor 7/JUMONJI-transcription factor 20	5
BP	GO:0048583	regulation of response to stimulus	61/3483	331/22306	0.0913182	0.388013	Zm00001d000228/Zm00001d004655/Zm00001d004976/Zm00001d005812/Zm00001d006607/Zm00001d007938/Zm00001d010470/Zm00001d011401/Zm00001d013757/Zm00001d014413/Zm00001d014445/Zm00001d014446/Zm00001d014562/Zm00001d014705/Zm00001d014977/Zm00001d015053/Zm00001d016926/Zm00001d017809/Zm00001d018024/Zm00001d018057/Zm00001d018243/Zm00001d018902/Zm00001d019263/Zm00001d019287/Zm00001d019670/Zm00001d019907/Zm00001d0…	-/-/-/-/-/-/-/-/-/tel2-interacting protein1/-/-/-/C3H-transcription factor 329/brahma1/terpene synthase2/-/-/PIN-formed protein2/-/-/-/-/-/-/set domain gene128/CCAAT-HAP5-transcription factor 516/-/-/-/-/-/-/-/-/-/SnRK2 serine threonine protein kinase8/-/enhancer of zeste1/-/-/-/-/-/-/-/-/PIN-formed protein5/PIN-formed protein9/-/-/-/-/-/-/CCAAT-HAP5-transcription factor 57/-/chaperonin10/-/CCAAT…	61
BP	GO:0006813	potassium ion transport	19/3483	89/22306	0.0925518	0.391718	Zm00001d001788/Zm00001d002359/Zm00001d011913/Zm00001d017925/Zm00001d018339/Zm00001d019631/Zm00001d020325/Zm00001d020892/Zm00001d021844/Zm00001d022485/Zm00001d022504/Zm00001d026289/Zm00001d026645/Zm00001d028330/Zm00001d036622/Zm00001d037970/Zm00001d041308/Zm00001d043765/Zm00001d053873	-/-/-/-/-/-/-/-/-/-/-/-/-/-/-/-/-/-/-	19
BP	GO:0006891	intra-Golgi vesicle-mediated transport	19/3483	89/22306	0.0925518	0.391718	Zm00001d006433/Zm00001d006939/Zm00001d009816/Zm00001d010537/Zm00001d012634/Zm00001d012760/Zm00001d012851/Zm00001d016183/Zm00001d016402/Zm00001d020783/Zm00001d026283/Zm00001d028279/Zm00001d032099/Zm00001d033488/Zm00001d038059/Zm00001d040503/Zm00001d043502/Zm00001d048217/Zm00001d053609	-/-/-/-/-/-/-/-/-/-/-/-/-/-/-/-/-/-/-	19
BP	GO:0048608	reproductive structure development	66/3483	361/22306	0.0928368	0.392159	Zm00001d000176/Zm00001d004993/Zm00001d005107/Zm00001d005281/Zm00001d007675/Zm00001d007905/Zm00001d008743/Zm00001d008846/Zm00001d009452/Zm00001d012212/Zm00001d013421/Zm00001d013891/Zm00001d014297/Zm00001d015837/Zm00001d017427/Zm00001d017742/Zm00001d017982/Zm00001d019881/Zm00001d019907/Zm00001d020874/Zm00001d021057/Zm00001d021384/Zm00001d021863/Zm00001d021871/Zm00001d022016/Zm00001d022324/Zm00001d0…	-/-/-/-/-/-/-/-/-/gibberellin 20-oxidase5/-/-/histidine kinase3/-/-/GRF-transcription factor 6/-/-/set domain gene128/CCAAT-HAP5-transcription factor 516/Zea mays MADS7/-/C2C2-YABBY-transcription factor 4/-/-/-/-/dicer-like4/dicer-like 101/-/-/-/defective kernel1/-/-/-/-/embryo specific2/enhancer of zeste1/-/-/-/-/-/trehalose-6-phosphate synthase12/-/-/Glutamine--tRNA ligase cytoplasmic1/-/-/-/-/…	66
BP	GO:0030488	tRNA methylation	11/3483	46/22306	0.0932693	0.393219	Zm00001d012794/Zm00001d015086/Zm00001d017897/Zm00001d018070/Zm00001d021624/Zm00001d022045/Zm00001d024463/Zm00001d028098/Zm00001d028596/Zm00001d028597/Zm00001d053963	-/-/-/-/-/-/-/-/-/-/-	11
BP	GO:2000113	negative regulation of cellular macromolecule biosynthetic process	61/3483	332/22306	0.0954412	0.401056	Zm00001d002594/Zm00001d004568/Zm00001d004573/Zm00001d006918/Zm00001d007407/Zm00001d007436/Zm00001d008233/Zm00001d008429/Zm00001d009520/Zm00001d011158/Zm00001d012052/Zm00001d012824/Zm00001d013278/Zm00001d013440/Zm00001d013653/Zm00001d014909/Zm00001d014977/Zm00001d015765/Zm00001d016518/Zm00001d017962/Zm00001d018218/Zm00001d018890/Zm00001d019789/Zm00001d020182/Zm00001d021145/Zm00001d022069/Zm00001d0…	OVATE-transcription factor 7/-/-/-/related to retinoblastoma1/CCAAT-HAP5-transcription factor 58/-/-/-/PHD-transcription factor 10/-/-/PHD-transcription factor 25/-/-/-/brahma1/-/-/-/GNAT-transcription factor 26/-/-/histone acetyltransferase1/-/-/-/-/-/-/dicer-like 101/-/-/-/methyl binding domain119/retinoblastoma family3/-/-/-/-/PHD-transcription factor 15/-/-/enhancer of zeste1/PHD-transcriptio…	61
BP	GO:0006378	mRNA polyadenylation	10/3483	41/22306	0.0956835	0.401056	Zm00001d004154/Zm00001d013599/Zm00001d022535/Zm00001d025673/Zm00001d027515/Zm00001d036977/Zm00001d044552/Zm00001d046255/Zm00001d052888/Zm00001d053559	-/-/-/-/-/-/-/-/-/-	10
BP	GO:0046365	monosaccharide catabolic process	10/3483	41/22306	0.0956835	0.401056	Zm00001d002377/Zm00001d011526/Zm00001d013428/Zm00001d018902/Zm00001d026311/Zm00001d032346/Zm00001d033746/Zm00001d034733/Zm00001d035212/Zm00001d048324	-/-/phosphoglucomutase2/-/-/-/phosphoglucomutase1/-/-/-	10
BP	GO:0009310	amine catabolic process	6/3483	21/22306	0.0965492	0.401578	Zm00001d015599/Zm00001d019698/Zm00001d024281/Zm00001d026334/Zm00001d026586/Zm00001d032815	-/-/polyamine oxidase1/-/-/-	6
BP	GO:0010833	telomere maintenance via telomere lengthening	6/3483	21/22306	0.0965492	0.401578	Zm00001d005502/Zm00001d019920/Zm00001d026612/Zm00001d036531/Zm00001d047427/Zm00001d050612	-/-/-/-/-/-	6
BP	GO:0042402	cellular biogenic amine catabolic process	6/3483	21/22306	0.0965492	0.401578	Zm00001d015599/Zm00001d019698/Zm00001d024281/Zm00001d026334/Zm00001d026586/Zm00001d032815	-/-/polyamine oxidase1/-/-/-	6
BP	GO:0051181	cofactor transport	6/3483	21/22306	0.0965492	0.401578	Zm00001d000199/Zm00001d010023/Zm00001d013334/Zm00001d025904/Zm00001d037727/Zm00001d042213	-/-/-/-/-/thiamine diphosphate carrier protein2	6
BP	GO:0006278	RNA-dependent DNA biosynthetic process	9/3483	36/22306	0.0976195	0.405252	Zm00001d005269/Zm00001d005502/Zm00001d015086/Zm00001d019920/Zm00001d026612/Zm00001d032798/Zm00001d036531/Zm00001d047427/Zm00001d050612	-/-/-/-/-/-/-/-/-	9
BP	GO:0009553	embryo sac development	8/3483	31/22306	0.098784	0.409302	Zm00001d005269/Zm00001d012824/Zm00001d013274/Zm00001d014685/Zm00001d028238/Zm00001d038475/Zm00001d038973/Zm00001d040116	-/-/-/-/-/ribosome export associated1/-/-	8
BP	GO:0045333	cellular respiration	33/3483	169/22306	0.0992182	0.410086	Zm00001d003083/Zm00001d003923/Zm00001d003947/Zm00001d004564/Zm00001d011750/Zm00001d014030/Zm00001d014772/Zm00001d016166/Zm00001d017258/Zm00001d017727/Zm00001d018758/Zm00001d019040/Zm00001d021908/Zm00001d024952/Zm00001d025258/Zm00001d025286/Zm00001d028773/Zm00001d032187/Zm00001d032455/Zm00001d032695/Zm00001d033753/Zm00001d034244/Zm00001d037006/Zm00001d037294/Zm00001d037731/Zm00001d038658/Zm00001d0…	-/-/-/-/-/-/-/phosphoenolpyruvate carboxylase2/-/alternative oxidase1/succinate dehydrogenase1/-/-/aconitase2/-/iron-sulfur protein1/-/-/-/malate dehydrogenase4/-/-/-/-/-/-/-/-/-/-/aconitase3/-/-	33
BP	GO:0006766	vitamin metabolic process	19/3483	90/22306	0.100929	0.410086	Zm00001d002326/Zm00001d002511/Zm00001d007936/Zm00001d011183/Zm00001d026476/Zm00001d027352/Zm00001d027999/Zm00001d030657/Zm00001d031691/Zm00001d033110/Zm00001d033383/Zm00001d034493/Zm00001d037045/Zm00001d037507/Zm00001d041407/Zm00001d042661/Zm00001d049380/Zm00001d050844/Zm00001d053981	adenosylmethionine aminotransferase1/-/-/thiamine biosynthesis1/-/-/-/-/-/-/hydroxymethylpyrimidine phosphate synthase1/-/-/-/-/-/-/-/small kernel2	19
BP	GO:0006352	DNA-templated transcription, initiation	24/3483	118/22306	0.101192	0.410086	Zm00001d002366/Zm00001d009424/Zm00001d011680/Zm00001d013631/Zm00001d014255/Zm00001d014337/Zm00001d014575/Zm00001d015886/Zm00001d016439/Zm00001d020571/Zm00001d022141/Zm00001d028585/Zm00001d029473/Zm00001d030573/Zm00001d037807/Zm00001d037832/Zm00001d039729/Zm00001d046539/Zm00001d046579/Zm00001d047898/Zm00001d047966/Zm00001d049379/Zm00001d050616/Zm00001d053616	-/-/p15 (PC4 Sub1)-transcription factor 3/TATA-binding protein2/-/-/-/-/-/-/-/Sigma70-like-transcription factor 3/-/-/-/-/-/-/-/-/-/-/-/-	24
BP	GO:0008064	regulation of actin polymerization or depolymerization	12/3483	52/22306	0.101798	0.410086	Zm00001d007806/Zm00001d017106/Zm00001d018004/Zm00001d018484/Zm00001d018535/Zm00001d029343/Zm00001d035183/Zm00001d037497/Zm00001d042097/Zm00001d044802/Zm00001d045323/Zm00001d052273	-/-/Rho-related protein from plants 1/-/brick1/-/reaction to X. oryzae1/-/-/Rho-related protein from plants 5/double B-box zinc finger protein11/Rho-related protein from plants 8	12
BP	GO:0030641	regulation of cellular pH	12/3483	52/22306	0.101798	0.410086	Zm00001d002006/Zm00001d012446/Zm00001d020892/Zm00001d021000/Zm00001d021844/Zm00001d022504/Zm00001d027265/Zm00001d028330/Zm00001d028436/Zm00001d035093/Zm00001d041590/Zm00001d047910	plasma-membrane H+ATPase2/-/-/-/-/-/-/-/-/-/rotten ear2/-	12
BP	GO:0030832	regulation of actin filament length	12/3483	52/22306	0.101798	0.410086	Zm00001d007806/Zm00001d017106/Zm00001d018004/Zm00001d018484/Zm00001d018535/Zm00001d029343/Zm00001d035183/Zm00001d037497/Zm00001d042097/Zm00001d044802/Zm00001d045323/Zm00001d052273	-/-/Rho-related protein from plants 1/-/brick1/-/reaction to X. oryzae1/-/-/Rho-related protein from plants 5/double B-box zinc finger protein11/Rho-related protein from plants 8	12
BP	GO:0042430	indole-containing compound metabolic process	12/3483	52/22306	0.101798	0.410086	Zm00001d003395/Zm00001d015599/Zm00001d019698/Zm00001d023724/Zm00001d024393/Zm00001d025652/Zm00001d028536/Zm00001d029548/Zm00001d038071/Zm00001d038142/Zm00001d048461/Zm00001d049541	anthranilate synthase homolog1/-/-/-/-/-/-/csu323/-/-/blue fluorescent1/brown midrib3	12
BP	GO:0051261	protein depolymerization	12/3483	52/22306	0.101798	0.410086	Zm00001d006372/Zm00001d007692/Zm00001d012966/Zm00001d013141/Zm00001d014368/Zm00001d026621/Zm00001d029343/Zm00001d032598/Zm00001d034239/Zm00001d037497/Zm00001d041647/Zm00001d042097	actin depolymerizing factor2/-/-/-/-/-/-/-/-/-/-/-	12
BP	GO:0051453	regulation of intracellular pH	12/3483	52/22306	0.101798	0.410086	Zm00001d002006/Zm00001d012446/Zm00001d020892/Zm00001d021000/Zm00001d021844/Zm00001d022504/Zm00001d027265/Zm00001d028330/Zm00001d028436/Zm00001d035093/Zm00001d041590/Zm00001d047910	plasma-membrane H+ATPase2/-/-/-/-/-/-/-/-/-/rotten ear2/-	12
BP	GO:0110053	regulation of actin filament organization	12/3483	52/22306	0.101798	0.410086	Zm00001d007806/Zm00001d017106/Zm00001d018004/Zm00001d018484/Zm00001d018535/Zm00001d029343/Zm00001d035183/Zm00001d037497/Zm00001d042097/Zm00001d044802/Zm00001d045323/Zm00001d052273	-/-/Rho-related protein from plants 1/-/brick1/-/reaction to X. oryzae1/-/-/Rho-related protein from plants 5/double B-box zinc finger protein11/Rho-related protein from plants 8	12
BP	GO:0001731	formation of translation preinitiation complex	4/3483	12/22306	0.103704	0.410086	Zm00001d000300/Zm00001d016835/Zm00001d021815/Zm00001d022433	eucaryotic translation initiation factor5/-/elongation initiation factor2/-	4
BP	GO:0009687	abscisic acid metabolic process	4/3483	12/22306	0.103704	0.410086	Zm00001d025545/Zm00001d028024/Zm00001d033222/Zm00001d034387	zeaxanthin epoxidase2/-/viviparous14/aldehyde oxidase1	4
BP	GO:0009744	response to sucrose	4/3483	12/22306	0.103704	0.410086	Zm00001d014192/Zm00001d030554/Zm00001d031908/Zm00001d043840	-/-/-/origin recognition complex4	4
BP	GO:0009965	leaf morphogenesis	4/3483	12/22306	0.103704	0.410086	Zm00001d009520/Zm00001d036296/Zm00001d042713/Zm00001d045944	-/enhancer of zeste1/-/-	4
BP	GO:0016477	cell migration	4/3483	12/22306	0.103704	0.410086	Zm00001d018004/Zm00001d023262/Zm00001d044802/Zm00001d052273	Rho-related protein from plants 1/brick3/Rho-related protein from plants 5/Rho-related protein from plants 8	4
BP	GO:0019405	alditol catabolic process	4/3483	12/22306	0.103704	0.410086	Zm00001d002085/Zm00001d006221/Zm00001d021310/Zm00001d033795	-/triose phosphate isomerase2/-/-	4
BP	GO:0019563	glycerol catabolic process	4/3483	12/22306	0.103704	0.410086	Zm00001d002085/Zm00001d006221/Zm00001d021310/Zm00001d033795	-/triose phosphate isomerase2/-/-	4
BP	GO:0033619	membrane protein proteolysis	4/3483	12/22306	0.103704	0.410086	Zm00001d004702/Zm00001d014901/Zm00001d031933/Zm00001d051873	-/-/-/-	4
BP	GO:0034285	response to disaccharide	4/3483	12/22306	0.103704	0.410086	Zm00001d014192/Zm00001d030554/Zm00001d031908/Zm00001d043840	-/-/-/origin recognition complex4	4
BP	GO:0043288	apocarotenoid metabolic process	4/3483	12/22306	0.103704	0.410086	Zm00001d025545/Zm00001d028024/Zm00001d033222/Zm00001d034387	zeaxanthin epoxidase2/-/viviparous14/aldehyde oxidase1	4
BP	GO:0044403	symbiont process	4/3483	12/22306	0.103704	0.410086	Zm00001d007407/Zm00001d025830/Zm00001d027412/Zm00001d049297	related to retinoblastoma1/dicer-like4/dicer-like 101/-	4
BP	GO:0072659	protein localization to plasma membrane	4/3483	12/22306	0.103704	0.410086	Zm00001d011266/Zm00001d022172/Zm00001d029333/Zm00001d044367	-/-/-/-	4
BP	GO:0098719	sodium ion import across plasma membrane	4/3483	12/22306	0.103704	0.410086	Zm00001d020892/Zm00001d021844/Zm00001d022504/Zm00001d028330	-/-/-/-	4
BP	GO:1902644	tertiary alcohol metabolic process	4/3483	12/22306	0.103704	0.410086	Zm00001d025545/Zm00001d028024/Zm00001d033222/Zm00001d034387	zeaxanthin epoxidase2/-/viviparous14/aldehyde oxidase1	4
BP	GO:1990778	protein localization to cell periphery	4/3483	12/22306	0.103704	0.410086	Zm00001d011266/Zm00001d022172/Zm00001d029333/Zm00001d044367	-/-/-/-	4
BP	GO:0061458	reproductive system development	66/3483	364/22306	0.105152	0.415052	Zm00001d000176/Zm00001d004993/Zm00001d005107/Zm00001d005281/Zm00001d007675/Zm00001d007905/Zm00001d008743/Zm00001d008846/Zm00001d009452/Zm00001d012212/Zm00001d013421/Zm00001d013891/Zm00001d014297/Zm00001d015837/Zm00001d017427/Zm00001d017742/Zm00001d017982/Zm00001d019881/Zm00001d019907/Zm00001d020874/Zm00001d021057/Zm00001d021384/Zm00001d021863/Zm00001d021871/Zm00001d022016/Zm00001d022324/Zm00001d0…	-/-/-/-/-/-/-/-/-/gibberellin 20-oxidase5/-/-/histidine kinase3/-/-/GRF-transcription factor 6/-/-/set domain gene128/CCAAT-HAP5-transcription factor 516/Zea mays MADS7/-/C2C2-YABBY-transcription factor 4/-/-/-/-/dicer-like4/dicer-like 101/-/-/-/defective kernel1/-/-/-/-/embryo specific2/enhancer of zeste1/-/-/-/-/-/trehalose-6-phosphate synthase12/-/-/Glutamine--tRNA ligase cytoplasmic1/-/-/-/-/…	66
BP	GO:1901607	alpha-amino acid biosynthetic process	44/3483	234/22306	0.105631	0.416186	Zm00001d002051/Zm00001d003395/Zm00001d006214/Zm00001d009738/Zm00001d013223/Zm00001d017676/Zm00001d017958/Zm00001d020908/Zm00001d021956/Zm00001d022388/Zm00001d023429/Zm00001d023724/Zm00001d024393/Zm00001d025652/Zm00001d026501/Zm00001d027319/Zm00001d028220/Zm00001d028464/Zm00001d028536/Zm00001d028662/Zm00001d028712/Zm00001d029548/Zm00001d030760/Zm00001d031128/Zm00001d032815/Zm00001d033228/Zm00001d0…	-/anthranilate synthase homolog1/-/-/-/-/glutamine synthetase4/-/GNAT-transcription factor 33/ferredoxin-dependent glutamate synthase1/-/-/-/-/glutamine synthetase1/-/-/-/-/-/-/csu323/-/-/-/-/-/-/-/-/-/-/-/-/-/-/-/-/-/blue fluorescent1/GNAT-transcription factor 39/-/aspartate kinase-homoserine dehydrogenase1/glutamine synthetase5	44
BP	GO:0031050	dsRNA fragmentation	10/3483	42/22306	0.108868	0.425076	Zm00001d012824/Zm00001d014977/Zm00001d017962/Zm00001d018863/Zm00001d020011/Zm00001d025830/Zm00001d027412/Zm00001d029133/Zm00001d037971/Zm00001d043861	-/brahma1/-/hua enhancer1/-/dicer-like4/dicer-like 101/-/FHA-transcription factor 15/-	10
BP	GO:0043331	response to dsRNA	10/3483	42/22306	0.108868	0.425076	Zm00001d012824/Zm00001d014977/Zm00001d017962/Zm00001d018863/Zm00001d020011/Zm00001d025830/Zm00001d027412/Zm00001d029133/Zm00001d037971/Zm00001d043861	-/brahma1/-/hua enhancer1/-/dicer-like4/dicer-like 101/-/FHA-transcription factor 15/-	10
BP	GO:0043650	dicarboxylic acid biosynthetic process	10/3483	42/22306	0.108868	0.425076	Zm00001d022388/Zm00001d023817/Zm00001d038948/Zm00001d040599/Zm00001d040850/Zm00001d043845/Zm00001d043951/Zm00001d044503/Zm00001d046719/Zm00001d047935	ferredoxin-dependent glutamate synthase1/-/-/-/-/-/-/-/ARID-transcription factor 10/-	10
BP	GO:0070918	production of small RNA involved in gene silencing by RNA	10/3483	42/22306	0.108868	0.425076	Zm00001d012824/Zm00001d014977/Zm00001d017962/Zm00001d018863/Zm00001d020011/Zm00001d025830/Zm00001d027412/Zm00001d029133/Zm00001d037971/Zm00001d043861	-/brahma1/-/hua enhancer1/-/dicer-like4/dicer-like 101/-/FHA-transcription factor 15/-	10
BP	GO:0071359	cellular response to dsRNA	10/3483	42/22306	0.108868	0.425076	Zm00001d012824/Zm00001d014977/Zm00001d017962/Zm00001d018863/Zm00001d020011/Zm00001d025830/Zm00001d027412/Zm00001d029133/Zm00001d037971/Zm00001d043861	-/brahma1/-/hua enhancer1/-/dicer-like4/dicer-like 101/-/FHA-transcription factor 15/-	10
BP	GO:0048507	meristem development	13/3483	58/22306	0.109265	0.425858	Zm00001d002510/Zm00001d005281/Zm00001d014297/Zm00001d015194/Zm00001d025830/Zm00001d028370/Zm00001d028818/Zm00001d030149/Zm00001d033454/Zm00001d045944/Zm00001d046485/Zm00001d046973/Zm00001d049190	-/-/histidine kinase3/-/dicer-like4/-/defective kernel1/-/GRMZM2G039373/-/-/-/minichromosome maintenance7	13
BP	GO:0009451	RNA modification	85/3483	479/22306	0.109636	0.426537	Zm00001d003621/Zm00001d003786/Zm00001d004196/Zm00001d005972/Zm00001d007518/Zm00001d008298/Zm00001d008738/Zm00001d009021/Zm00001d009597/Zm00001d010714/Zm00001d011311/Zm00001d011901/Zm00001d012052/Zm00001d012794/Zm00001d012862/Zm00001d013488/Zm00001d013533/Zm00001d013673/Zm00001d014035/Zm00001d014719/Zm00001d015086/Zm00001d015124/Zm00001d015194/Zm00001d016595/Zm00001d016815/Zm00001d017242/Zm00001d0…	-/-/-/-/-/empty pericarp7/-/-/-/-/-/-/-/-/-/-/-/-/-/-/-/-/-/-/-/-/-/-/-/-/-/hua enhancer1/-/bHLH-transcription factor 106/NAC-transcription factor 79/-/-/-/-/-/-/-/-/-/-/-/-/-/-/-/-/-/-/-/-/-/-/-/-/-/-/-/-/-/-/-/-/-/-/-/-/-/-/-/-/-/-/-/budding unhibited by benzimidazoles homolog3/-/-/-/-/-/-	85
BP	GO:1901990	regulation of mitotic cell cycle phase transition	15/3483	69/22306	0.110749	0.430094	Zm00001d002154/Zm00001d004709/Zm00001d007407/Zm00001d007585/Zm00001d018057/Zm00001d023279/Zm00001d028143/Zm00001d031678/Zm00001d042639/Zm00001d042810/Zm00001d044630/Zm00001d045080/Zm00001d047873/Zm00001d052695/Zm00001d053930	meiotic recombination protein 11 homolog A/-/related to retinoblastoma1/-/-/-/-/retinoblastoma family3/-/-/-/origin recognition complex1/-/-/-	15
BP	GO:0000184	nuclear-transcribed mRNA catabolic process, nonsense-mediated decay	9/3483	37/22306	0.112004	0.433416	Zm00001d003611/Zm00001d005502/Zm00001d010901/Zm00001d017303/Zm00001d017982/Zm00001d019920/Zm00001d029133/Zm00001d029754/Zm00001d051183	-/-/-/-/-/-/-/-/-	9
BP	GO:0046173	polyol biosynthetic process	9/3483	37/22306	0.112004	0.433416	Zm00001d001974/Zm00001d026514/Zm00001d033110/Zm00001d033551/Zm00001d033927/Zm00001d037110/Zm00001d037731/Zm00001d044175/Zm00001d048201	-/-/-/-/-/-/-/-/-	9
BP	GO:0009129	pyrimidine nucleoside monophosphate metabolic process	5/3483	17/22306	0.112848	0.434353	Zm00001d007318/Zm00001d011855/Zm00001d014912/Zm00001d015484/Zm00001d037208	-/-/protein disulfide isomerase4/-/-	5
BP	GO:0009130	pyrimidine nucleoside monophosphate biosynthetic process	5/3483	17/22306	0.112848	0.434353	Zm00001d007318/Zm00001d011855/Zm00001d014912/Zm00001d015484/Zm00001d037208	-/-/protein disulfide isomerase4/-/-	5
BP	GO:0043455	regulation of secondary metabolic process	5/3483	17/22306	0.112848	0.434353	Zm00001d004580/Zm00001d005241/Zm00001d022429/Zm00001d028024/Zm00001d038071	-/-/-/-/-	5
BP	GO:0001932	regulation of protein phosphorylation	40/3483	212/22306	0.113619	0.436547	Zm00001d001978/Zm00001d002662/Zm00001d002778/Zm00001d003401/Zm00001d005064/Zm00001d010656/Zm00001d012560/Zm00001d017392/Zm00001d017525/Zm00001d019681/Zm00001d020158/Zm00001d021584/Zm00001d023230/Zm00001d025449/Zm00001d026030/Zm00001d027585/Zm00001d027790/Zm00001d028514/Zm00001d033365/Zm00001d033370/Zm00001d034055/Zm00001d034817/Zm00001d035087/Zm00001d036620/Zm00001d037626/Zm00001d040381/Zm00001d0…	-/cyclin8/CK2 regulatory subunit B1/general regulatory factor1/-/cyclin1/cyclin7/-/-/-/-/-/-/-/-/cyclin-dependent kinase inhibitor3/-/MAP kinase kinase kinase11/-/-/-/-/acidic ribosomal protein P1a/-/-/-/-/-/-/-/-/-/-/autophagy13a/-/-/-/autophagy11a/-/-	40
BP	GO:0032956	regulation of actin cytoskeleton organization	12/3483	53/22306	0.113822	0.436554	Zm00001d007806/Zm00001d017106/Zm00001d018004/Zm00001d018484/Zm00001d018535/Zm00001d029343/Zm00001d035183/Zm00001d037497/Zm00001d042097/Zm00001d044802/Zm00001d045323/Zm00001d052273	-/-/Rho-related protein from plants 1/-/brick1/-/reaction to X. oryzae1/-/-/Rho-related protein from plants 5/double B-box zinc finger protein11/Rho-related protein from plants 8	12
BP	GO:0010389	regulation of G2/M transition of mitotic cell cycle	8/3483	32/22306	0.114573	0.437882	Zm00001d002154/Zm00001d004709/Zm00001d018057/Zm00001d028143/Zm00001d042810/Zm00001d045080/Zm00001d047873/Zm00001d053930	meiotic recombination protein 11 homolog A/-/-/-/-/origin recognition complex1/-/-	8
BP	GO:0019674	NAD metabolic process	8/3483	32/22306	0.114573	0.437882	Zm00001d011835/Zm00001d014030/Zm00001d032695/Zm00001d040599/Zm00001d042052/Zm00001d042152/Zm00001d045394/Zm00001d053076	-/-/malate dehydrogenase4/-/-/-/-/-	8
BP	GO:0006814	sodium ion transport	6/3483	22/22306	0.116042	0.440069	Zm00001d020892/Zm00001d020921/Zm00001d021844/Zm00001d022504/Zm00001d023929/Zm00001d028330	-/-/-/-/oxo-glutarate/malate transporter1/-	6
BP	GO:0007163	establishment or maintenance of cell polarity	6/3483	22/22306	0.116042	0.440069	Zm00001d012525/Zm00001d013389/Zm00001d018004/Zm00001d043093/Zm00001d044802/Zm00001d052273	-/-/Rho-related protein from plants 1/-/Rho-related protein from plants 5/Rho-related protein from plants 8	6
BP	GO:0032509	endosome transport via multivesicular body sorting pathway	6/3483	22/22306	0.116042	0.440069	Zm00001d012618/Zm00001d032710/Zm00001d043112/Zm00001d043269/Zm00001d048239/Zm00001d048616	-/-/-/-/-/-	6
BP	GO:0034982	mitochondrial protein processing	6/3483	22/22306	0.116042	0.440069	Zm00001d006107/Zm00001d010522/Zm00001d014516/Zm00001d027672/Zm00001d038776/Zm00001d048102	pyruvate dehydrogenase3/-/-/-/-/-	6
BP	GO:0006730	one-carbon metabolic process	7/3483	27/22306	0.11616	0.440069	Zm00001d005614/Zm00001d007318/Zm00001d009738/Zm00001d010920/Zm00001d042661/Zm00001d048514/Zm00001d053900	-/-/-/-/-/brown midrib4/-	7
BP	GO:0042157	lipoprotein metabolic process	21/3483	103/22306	0.116806	0.441743	Zm00001d002534/Zm00001d006102/Zm00001d012034/Zm00001d012118/Zm00001d016990/Zm00001d017654/Zm00001d022038/Zm00001d026600/Zm00001d027485/Zm00001d028619/Zm00001d029333/Zm00001d036055/Zm00001d038321/Zm00001d043842/Zm00001d044554/Zm00001d044647/Zm00001d047439/Zm00001d047805/Zm00001d049857/Zm00001d051421/Zm00001d053627	-/-/-/-/-/-/-/-/-/-/-/-/-/-/-/-/-/-/-/-/-	21
BP	GO:0009642	response to light intensity	11/3483	48/22306	0.118435	0.447123	Zm00001d017818/Zm00001d018796/Zm00001d027588/Zm00001d028152/Zm00001d031115/Zm00001d031908/Zm00001d032455/Zm00001d037110/Zm00001d038894/Zm00001d045944/Zm00001d046971	-/-/-/-/-/-/-/-/-/-/-	11
BP	GO:0006820	anion transport	69/3483	385/22306	0.118653	0.447167	Zm00001d001788/Zm00001d002603/Zm00001d002679/Zm00001d002941/Zm00001d005006/Zm00001d005257/Zm00001d006679/Zm00001d008679/Zm00001d008738/Zm00001d010478/Zm00001d012747/Zm00001d013334/Zm00001d014188/Zm00001d014327/Zm00001d014976/Zm00001d016855/Zm00001d016982/Zm00001d017868/Zm00001d018557/Zm00001d018598/Zm00001d019225/Zm00001d020892/Zm00001d021844/Zm00001d021972/Zm00001d021993/Zm00001d022504/Zm00001d0…	-/-/-/-/-/-/-/-/-/-/-/-/-/-/-/-/-/-/-/-/-/-/-/-/-/-/-/-/-/-/-/-/-/-/-/blue-light receptor phototropin 2/-/-/-/-/-/-/-/-/voltage-dependent anion channel protein2/-/-/-/rotten ear2/thiamine diphosphate carrier protein2/-/-/-/-/-/-/-/-/-/-/-/-/-/-/-/-/adenine nucleotide translocator2/-/-	69
BP	GO:0000413	protein peptidyl-prolyl isomerization	19/3483	92/22306	0.119066	0.447946	Zm00001d003192/Zm00001d004930/Zm00001d015729/Zm00001d016512/Zm00001d018134/Zm00001d020438/Zm00001d022631/Zm00001d027321/Zm00001d028396/Zm00001d029272/Zm00001d031569/Zm00001d036035/Zm00001d036620/Zm00001d038368/Zm00001d042372/Zm00001d044297/Zm00001d045476/Zm00001d047426/Zm00001d053805	-/-/-/-/-/-/-/-/-/-/-/-/-/-/-/-/-/-/-	19
BP	GO:0000381	regulation of alternative mRNA splicing, via spliceosome	13/3483	59/22306	0.121127	0.452861	Zm00001d006906/Zm00001d010901/Zm00001d015194/Zm00001d022243/Zm00001d029256/Zm00001d031269/Zm00001d035551/Zm00001d037925/Zm00001d042040/Zm00001d047498/Zm00001d048609/Zm00001d051052/Zm00001d053613	-/-/-/-/-/-/-/-/-/-/-/-/-	13
BP	GO:1905392	plant organ morphogenesis	13/3483	59/22306	0.121127	0.452861	Zm00001d007158/Zm00001d008743/Zm00001d009520/Zm00001d019881/Zm00001d024205/Zm00001d028370/Zm00001d033792/Zm00001d036296/Zm00001d040724/Zm00001d042713/Zm00001d045944/Zm00001d046485/Zm00001d049190	-/-/-/-/-/-/-/enhancer of zeste1/-/-/-/-/minichromosome maintenance7	13
BP	GO:0045859	regulation of protein kinase activity	35/3483	184/22306	0.121141	0.452861	Zm00001d001978/Zm00001d002662/Zm00001d002778/Zm00001d003401/Zm00001d005064/Zm00001d010656/Zm00001d012560/Zm00001d017392/Zm00001d017525/Zm00001d019681/Zm00001d020158/Zm00001d021584/Zm00001d023230/Zm00001d025449/Zm00001d026030/Zm00001d027585/Zm00001d027790/Zm00001d028514/Zm00001d033365/Zm00001d034055/Zm00001d035087/Zm00001d040381/Zm00001d045359/Zm00001d045967/Zm00001d047310/Zm00001d047728/Zm00001d0…	-/cyclin8/CK2 regulatory subunit B1/general regulatory factor1/-/cyclin1/cyclin7/-/-/-/-/-/-/-/-/cyclin-dependent kinase inhibitor3/-/MAP kinase kinase kinase11/-/-/acidic ribosomal protein P1a/-/-/-/-/-/-/-/-/autophagy13a/-/-/-/-/-	35
BP	GO:0006368	transcription elongation from RNA polymerase II promoter	15/3483	70/22306	0.121627	0.452861	Zm00001d006759/Zm00001d009791/Zm00001d010719/Zm00001d012030/Zm00001d013371/Zm00001d014337/Zm00001d016846/Zm00001d018664/Zm00001d022141/Zm00001d035050/Zm00001d038570/Zm00001d043296/Zm00001d043434/Zm00001d044753/Zm00001d044971	-/-/-/-/-/-/-/-/-/-/-/-/-/-/-	15
BP	GO:0051129	negative regulation of cellular component organization	15/3483	70/22306	0.121627	0.452861	Zm00001d007585/Zm00001d012052/Zm00001d013440/Zm00001d021145/Zm00001d023279/Zm00001d024953/Zm00001d029343/Zm00001d037497/Zm00001d042639/Zm00001d044358/Zm00001d044630/Zm00001d045323/Zm00001d047427/Zm00001d049190/Zm00001d052353	-/-/-/-/-/-/-/-/-/-/-/double B-box zinc finger protein11/-/minichromosome maintenance7/-	15
BP	GO:1901987	regulation of cell cycle phase transition	15/3483	70/22306	0.121627	0.452861	Zm00001d002154/Zm00001d004709/Zm00001d007407/Zm00001d007585/Zm00001d018057/Zm00001d023279/Zm00001d028143/Zm00001d031678/Zm00001d042639/Zm00001d042810/Zm00001d044630/Zm00001d045080/Zm00001d047873/Zm00001d052695/Zm00001d053930	meiotic recombination protein 11 homolog A/-/related to retinoblastoma1/-/-/-/-/retinoblastoma family3/-/-/-/origin recognition complex1/-/-/-	15
BP	GO:0007346	regulation of mitotic cell cycle	31/3483	161/22306	0.122846	0.456107	Zm00001d002154/Zm00001d002662/Zm00001d004709/Zm00001d005269/Zm00001d007407/Zm00001d007585/Zm00001d007943/Zm00001d010656/Zm00001d012560/Zm00001d018057/Zm00001d018657/Zm00001d023279/Zm00001d023760/Zm00001d024953/Zm00001d028143/Zm00001d031678/Zm00001d033365/Zm00001d034082/Zm00001d037979/Zm00001d037981/Zm00001d040381/Zm00001d042639/Zm00001d042810/Zm00001d044630/Zm00001d045080/Zm00001d047873/Zm00001d0…	meiotic recombination protein 11 homolog A/cyclin8/-/-/related to retinoblastoma1/-/-/cyclin1/cyclin7/-/-/-/chitin synthase homolog1/-/-/retinoblastoma family3/-/-/-/-/-/-/-/-/origin recognition complex1/-/-/-/-/-/-	31
BP	GO:0043631	RNA polyadenylation	10/3483	43/22306	0.123031	0.456107	Zm00001d004154/Zm00001d013599/Zm00001d022535/Zm00001d025673/Zm00001d027515/Zm00001d036977/Zm00001d044552/Zm00001d046255/Zm00001d052888/Zm00001d053559	-/-/-/-/-/-/-/-/-/-	10
BP	GO:0003006	developmental process involved in reproduction	72/3483	404/22306	0.12313	0.456107	Zm00001d000176/Zm00001d004993/Zm00001d005107/Zm00001d005281/Zm00001d007675/Zm00001d007905/Zm00001d008743/Zm00001d008846/Zm00001d009452/Zm00001d012212/Zm00001d013274/Zm00001d013421/Zm00001d013891/Zm00001d014297/Zm00001d015837/Zm00001d017427/Zm00001d017742/Zm00001d017982/Zm00001d019881/Zm00001d019907/Zm00001d020874/Zm00001d021057/Zm00001d021384/Zm00001d021863/Zm00001d021871/Zm00001d022016/Zm00001d0…	-/-/-/-/-/-/-/-/-/gibberellin 20-oxidase5/-/-/-/histidine kinase3/-/-/GRF-transcription factor 6/-/-/set domain gene128/CCAAT-HAP5-transcription factor 516/Zea mays MADS7/-/C2C2-YABBY-transcription factor 4/-/-/-/-/-/dicer-like4/dicer-like 101/-/-/-/-/defective kernel1/-/-/-/-/-/-/-/embryo specific2/enhancer of zeste1/-/-/-/-/-/trehalose-6-phosphate synthase12/-/-/Glutamine--tRNA ligase cytoplasm…	72
BP	GO:0045787	positive regulation of cell cycle	21/3483	104/22306	0.125873	0.460144	Zm00001d002662/Zm00001d005269/Zm00001d007943/Zm00001d010656/Zm00001d012560/Zm00001d017392/Zm00001d018657/Zm00001d019681/Zm00001d020158/Zm00001d023908/Zm00001d024953/Zm00001d026030/Zm00001d027790/Zm00001d028143/Zm00001d033365/Zm00001d035869/Zm00001d040381/Zm00001d045611/Zm00001d048127/Zm00001d051291/Zm00001d052185	cyclin8/-/-/cyclin1/cyclin7/-/-/-/-/-/-/-/-/-/-/-/-/-/-/-/-	21
BP	GO:0032970	regulation of actin filament-based process	12/3483	54/22306	0.12663	0.460144	Zm00001d007806/Zm00001d017106/Zm00001d018004/Zm00001d018484/Zm00001d018535/Zm00001d029343/Zm00001d035183/Zm00001d037497/Zm00001d042097/Zm00001d044802/Zm00001d045323/Zm00001d052273	-/-/Rho-related protein from plants 1/-/brick1/-/reaction to X. oryzae1/-/-/Rho-related protein from plants 5/double B-box zinc finger protein11/Rho-related protein from plants 8	12
BP	GO:0042775	mitochondrial ATP synthesis coupled electron transport	12/3483	54/22306	0.12663	0.460144	Zm00001d011750/Zm00001d014772/Zm00001d018758/Zm00001d025286/Zm00001d028773/Zm00001d034244/Zm00001d038658/Zm00001d044459/Zm00001d047720/Zm00001d048102/Zm00001d050696/Zm00001d052436	-/-/succinate dehydrogenase1/iron-sulfur protein1/-/-/-/-/-/-/-/-	12
BP	GO:0006662	glycerol ether metabolic process	9/3483	38/22306	0.127494	0.460144	Zm00001d002854/Zm00001d013061/Zm00001d017379/Zm00001d018238/Zm00001d023707/Zm00001d030867/Zm00001d034491/Zm00001d037499/Zm00001d038653	-/-/-/-/thioredoxin M1/-/-/-/thioredoxin h homolog1	9
BP	GO:0010015	root morphogenesis	9/3483	38/22306	0.127494	0.460144	Zm00001d007158/Zm00001d008743/Zm00001d019881/Zm00001d024205/Zm00001d028370/Zm00001d033792/Zm00001d040724/Zm00001d046485/Zm00001d049190	-/-/-/-/-/-/-/-/minichromosome maintenance7	9
BP	GO:0018904	ether metabolic process	9/3483	38/22306	0.127494	0.460144	Zm00001d002854/Zm00001d013061/Zm00001d017379/Zm00001d018238/Zm00001d023707/Zm00001d030867/Zm00001d034491/Zm00001d037499/Zm00001d038653	-/-/-/-/thioredoxin M1/-/-/-/thioredoxin h homolog1	9
BP	GO:0007033	vacuole organization	17/3483	82/22306	0.131328	0.460144	Zm00001d000178/Zm00001d002824/Zm00001d008596/Zm00001d024205/Zm00001d025134/Zm00001d026676/Zm00001d031942/Zm00001d033368/Zm00001d035093/Zm00001d039904/Zm00001d041948/Zm00001d047833/Zm00001d048258/Zm00001d051021/Zm00001d051033/Zm00001d051307/Zm00001d053741	autophagy3/-/-/-/-/-/-/-/-/-/-/autophagy1c/-/-/autophagy101/autophagy13a/autophagy11a	17
BP	GO:0000086	G2/M transition of mitotic cell cycle	8/3483	33/22306	0.131629	0.460144	Zm00001d002154/Zm00001d004709/Zm00001d018057/Zm00001d028143/Zm00001d042810/Zm00001d045080/Zm00001d047873/Zm00001d053930	meiotic recombination protein 11 homolog A/-/-/-/-/origin recognition complex1/-/-	8
BP	GO:0000463	maturation of LSU-rRNA from tricistronic rRNA transcript (SSU-rRNA, 5.8S rRNA, LSU-rRNA)	8/3483	33/22306	0.131629	0.460144	Zm00001d000432/Zm00001d009597/Zm00001d018022/Zm00001d026254/Zm00001d033616/Zm00001d038646/Zm00001d039047/Zm00001d040768	-/-/-/-/-/-/-/-	8
BP	GO:0032273	positive regulation of protein polymerization	8/3483	33/22306	0.131629	0.460144	Zm00001d007806/Zm00001d017106/Zm00001d018004/Zm00001d018484/Zm00001d033414/Zm00001d035183/Zm00001d044802/Zm00001d052273	-/-/Rho-related protein from plants 1/-/-/reaction to X. oryzae1/Rho-related protein from plants 5/Rho-related protein from plants 8	8
BP	GO:0061136	regulation of proteasomal protein catabolic process	8/3483	33/22306	0.131629	0.460144	Zm00001d003207/Zm00001d015886/Zm00001d025750/Zm00001d028285/Zm00001d031178/Zm00001d035574/Zm00001d050090/Zm00001d050616	-/-/-/-/-/-/-/-	8
BP	GO:1902749	regulation of cell cycle G2/M phase transition	8/3483	33/22306	0.131629	0.460144	Zm00001d002154/Zm00001d004709/Zm00001d018057/Zm00001d028143/Zm00001d042810/Zm00001d045080/Zm00001d047873/Zm00001d053930	meiotic recombination protein 11 homolog A/-/-/-/-/origin recognition complex1/-/-	8
BP	GO:1903050	regulation of proteolysis involved in cellular protein catabolic process	8/3483	33/22306	0.131629	0.460144	Zm00001d003207/Zm00001d015886/Zm00001d025750/Zm00001d028285/Zm00001d031178/Zm00001d035574/Zm00001d050090/Zm00001d050616	-/-/-/-/-/-/-/-	8
BP	GO:1903362	regulation of cellular protein catabolic process	8/3483	33/22306	0.131629	0.460144	Zm00001d003207/Zm00001d015886/Zm00001d025750/Zm00001d028285/Zm00001d031178/Zm00001d035574/Zm00001d050090/Zm00001d050616	-/-/-/-/-/-/-/-	8
BP	GO:0000105	histidine biosynthetic process	4/3483	13/22306	0.132077	0.460144	Zm00001d020908/Zm00001d028464/Zm00001d029548/Zm00001d038142	-/-/csu323/-	4
BP	GO:0000290	deadenylation-dependent decapping of nuclear-transcribed mRNA	4/3483	13/22306	0.132077	0.460144	Zm00001d015955/Zm00001d019314/Zm00001d038671/Zm00001d052561	-/-/-/-	4
BP	GO:0006547	histidine metabolic process	4/3483	13/22306	0.132077	0.460144	Zm00001d020908/Zm00001d028464/Zm00001d029548/Zm00001d038142	-/-/csu323/-	4
BP	GO:0006638	neutral lipid metabolic process	4/3483	13/22306	0.132077	0.460144	Zm00001d002085/Zm00001d007442/Zm00001d028731/Zm00001d037760	-/-/-/-	4
BP	GO:0006639	acylglycerol metabolic process	4/3483	13/22306	0.132077	0.460144	Zm00001d002085/Zm00001d007442/Zm00001d028731/Zm00001d037760	-/-/-/-	4
BP	GO:0006734	NADH metabolic process	4/3483	13/22306	0.132077	0.460144	Zm00001d014030/Zm00001d032695/Zm00001d042152/Zm00001d045394	-/malate dehydrogenase4/-/-	4
BP	GO:0007063	regulation of sister chromatid cohesion	4/3483	13/22306	0.132077	0.460144	Zm00001d007943/Zm00001d014913/Zm00001d018657/Zm00001d032575	-/-/-/-	4
BP	GO:0007568	aging	4/3483	13/22306	0.132077	0.460144	Zm00001d017771/Zm00001d036296/Zm00001d039495/Zm00001d040166	-/enhancer of zeste1/-/-	4
BP	GO:0009313	oligosaccharide catabolic process	4/3483	13/22306	0.132077	0.460144	Zm00001d022206/Zm00001d028926/Zm00001d042066/Zm00001d050645	-/-/cytokinin response regulator5/-	4
BP	GO:0010204	defense response signaling pathway, resistance gene-independent	4/3483	13/22306	0.132077	0.460144	Zm00001d004655/Zm00001d031580/Zm00001d037381/Zm00001d045784	-/-/-/-	4
BP	GO:0010675	regulation of cellular carbohydrate metabolic process	4/3483	13/22306	0.132077	0.460144	Zm00001d008613/Zm00001d037110/Zm00001d037553/Zm00001d048349	-/-/-/-	4
BP	GO:0015851	nucleobase transport	4/3483	13/22306	0.132077	0.460144	Zm00001d007251/Zm00001d012307/Zm00001d030868/Zm00001d035214	-/-/-/GRMZM2G055238	4
BP	GO:0035725	sodium ion transmembrane transport	4/3483	13/22306	0.132077	0.460144	Zm00001d020892/Zm00001d021844/Zm00001d022504/Zm00001d028330	-/-/-/-	4
BP	GO:0043243	positive regulation of protein complex disassembly	4/3483	13/22306	0.132077	0.460144	Zm00001d007940/Zm00001d022042/Zm00001d034575/Zm00001d042097	-/eukaryotic translation initiation factor 5A/-/-	4
BP	GO:0043388	positive regulation of DNA binding	4/3483	13/22306	0.132077	0.460144	Zm00001d007943/Zm00001d014913/Zm00001d018657/Zm00001d032575	-/-/-/-	4
BP	GO:0046352	disaccharide catabolic process	4/3483	13/22306	0.132077	0.460144	Zm00001d022206/Zm00001d028926/Zm00001d042066/Zm00001d050645	-/-/cytokinin response regulator5/-	4
BP	GO:0051099	positive regulation of binding	4/3483	13/22306	0.132077	0.460144	Zm00001d007943/Zm00001d014913/Zm00001d018657/Zm00001d032575	-/-/-/-	4
BP	GO:0052803	imidazole-containing compound metabolic process	4/3483	13/22306	0.132077	0.460144	Zm00001d020908/Zm00001d028464/Zm00001d029548/Zm00001d038142	-/-/csu323/-	4
BP	GO:0071168	protein localization to chromatin	4/3483	13/22306	0.132077	0.460144	Zm00001d007943/Zm00001d014913/Zm00001d018657/Zm00001d032575	-/-/-/-	4
BP	GO:0071921	cohesin loading	4/3483	13/22306	0.132077	0.460144	Zm00001d007943/Zm00001d014913/Zm00001d018657/Zm00001d032575	-/-/-/-	4
BP	GO:0071922	regulation of cohesin loading	4/3483	13/22306	0.132077	0.460144	Zm00001d007943/Zm00001d014913/Zm00001d018657/Zm00001d032575	-/-/-/-	4
BP	GO:1903829	positive regulation of cellular protein localization	4/3483	13/22306	0.132077	0.460144	Zm00001d007943/Zm00001d018657/Zm00001d035889/Zm00001d054076	-/-/-/-	4
BP	GO:1905634	regulation of protein localization to chromatin	4/3483	13/22306	0.132077	0.460144	Zm00001d007943/Zm00001d014913/Zm00001d018657/Zm00001d032575	-/-/-/-	4
BP	GO:0015914	phospholipid transport	11/3483	49/22306	0.132317	0.460241	Zm00001d014188/Zm00001d021972/Zm00001d025153/Zm00001d032334/Zm00001d032980/Zm00001d036233/Zm00001d040456/Zm00001d045956/Zm00001d046194/Zm00001d047527/Zm00001d051661	-/-/-/-/-/-/-/-/-/-/-	11
BP	GO:0042325	regulation of phosphorylation	42/3483	227/22306	0.133737	0.464435	Zm00001d001978/Zm00001d002662/Zm00001d002778/Zm00001d003401/Zm00001d005064/Zm00001d010656/Zm00001d012560/Zm00001d017392/Zm00001d017525/Zm00001d019681/Zm00001d020158/Zm00001d021584/Zm00001d023230/Zm00001d025449/Zm00001d026030/Zm00001d027585/Zm00001d027790/Zm00001d028514/Zm00001d033365/Zm00001d033370/Zm00001d034055/Zm00001d034817/Zm00001d035087/Zm00001d036620/Zm00001d037626/Zm00001d040381/Zm00001d0…	-/cyclin8/CK2 regulatory subunit B1/general regulatory factor1/-/cyclin1/cyclin7/-/-/-/-/-/-/-/-/cyclin-dependent kinase inhibitor3/-/MAP kinase kinase kinase11/-/-/-/-/acidic ribosomal protein P1a/-/-/-/-/-/-/-/-/-/-/-/-/autophagy13a/-/-/-/autophagy11a/-/-	42
BP	GO:0031122	cytoplasmic microtubule organization	7/3483	28/22306	0.135107	0.466452	Zm00001d009780/Zm00001d011563/Zm00001d022114/Zm00001d023735/Zm00001d025793/Zm00001d041083/Zm00001d043841	gamma-tubulin1/-/-/-/-/-/-	7
BP	GO:0046785	microtubule polymerization	7/3483	28/22306	0.135107	0.466452	Zm00001d009780/Zm00001d012525/Zm00001d022114/Zm00001d025793/Zm00001d033414/Zm00001d034680/Zm00001d043093	gamma-tubulin1/-/-/-/-/-/-	7
BP	GO:0090068	positive regulation of cell cycle process	7/3483	28/22306	0.135107	0.466452	Zm00001d005269/Zm00001d007943/Zm00001d018657/Zm00001d023908/Zm00001d028143/Zm00001d035869/Zm00001d045611	-/-/-/-/-/-/-	7
BP	GO:0006714	sesquiterpenoid metabolic process	5/3483	18/22306	0.13715	0.466452	Zm00001d025545/Zm00001d028024/Zm00001d028094/Zm00001d033222/Zm00001d034387	zeaxanthin epoxidase2/-/-/viviparous14/aldehyde oxidase1	5
BP	GO:0006998	nuclear envelope organization	5/3483	18/22306	0.13715	0.466452	Zm00001d002012/Zm00001d015450/Zm00001d028262/Zm00001d041064/Zm00001d048047	-/SUN domain protein1/-/-/-	5
BP	GO:0009561	megagametogenesis	5/3483	18/22306	0.13715	0.466452	Zm00001d012824/Zm00001d014685/Zm00001d028238/Zm00001d038973/Zm00001d040116	-/-/-/-/-	5
BP	GO:0009787	regulation of abscisic acid-activated signaling pathway	5/3483	18/22306	0.13715	0.466452	Zm00001d010470/Zm00001d028298/Zm00001d028593/Zm00001d037110/Zm00001d038106	-/-/-/-/-	5
BP	GO:0042727	flavin-containing compound biosynthetic process	5/3483	18/22306	0.13715	0.466452	Zm00001d008320/Zm00001d026476/Zm00001d034493/Zm00001d037045/Zm00001d050844	-/-/-/-/-	5
BP	GO:1901419	regulation of response to alcohol	5/3483	18/22306	0.13715	0.466452	Zm00001d010470/Zm00001d028298/Zm00001d028593/Zm00001d037110/Zm00001d038106	-/-/-/-/-	5
BP	GO:1905957	regulation of cellular response to alcohol	5/3483	18/22306	0.13715	0.466452	Zm00001d010470/Zm00001d028298/Zm00001d028593/Zm00001d037110/Zm00001d038106	-/-/-/-/-	5
BP	GO:0015865	purine nucleotide transport	6/3483	23/22306	0.137331	0.466452	Zm00001d010478/Zm00001d023368/Zm00001d038850/Zm00001d046509/Zm00001d051685/Zm00001d053640	-/-/-/-/adenine nucleotide translocator2/-	6
BP	GO:0015868	purine ribonucleotide transport	6/3483	23/22306	0.137331	0.466452	Zm00001d010478/Zm00001d023368/Zm00001d038850/Zm00001d046509/Zm00001d051685/Zm00001d053640	-/-/-/-/adenine nucleotide translocator2/-	6
BP	GO:0051503	adenine nucleotide transport	6/3483	23/22306	0.137331	0.466452	Zm00001d010478/Zm00001d023368/Zm00001d038850/Zm00001d046509/Zm00001d051685/Zm00001d053640	-/-/-/-/adenine nucleotide translocator2/-	6
BP	GO:1903322	positive regulation of protein modification by small protein conjugation or removal	6/3483	23/22306	0.137331	0.466452	Zm00001d016034/Zm00001d022231/Zm00001d023520/Zm00001d032165/Zm00001d037246/Zm00001d041911	cell division cycle202/-/-/-/-/-	6
BP	GO:0006644	phospholipid metabolic process	53/3483	293/22306	0.137719	0.467036	Zm00001d007638/Zm00001d008310/Zm00001d010274/Zm00001d012034/Zm00001d012118/Zm00001d012701/Zm00001d013090/Zm00001d015249/Zm00001d016822/Zm00001d016990/Zm00001d017139/Zm00001d017654/Zm00001d018013/Zm00001d027485/Zm00001d028261/Zm00001d028366/Zm00001d028505/Zm00001d028698/Zm00001d029211/Zm00001d029333/Zm00001d032238/Zm00001d033110/Zm00001d033149/Zm00001d033645/Zm00001d033945/Zm00001d034516/Zm00001d0…	phospholipid synthesis1/-/isopentenyl pyrophosphate isomerase2/-/-/-/-/-/-/-/hydroxymethylbutenyl diphosphate synthase1/-/-/-/-/-/-/-/-/-/-/-/-/-/C2C2-GATA-transcription factor 34/-/-/-/-/-/phospholipase D13/-/-/-/phospholipase D1/-/-/-/-/-/-/-/-/-/-/-/-/-/-/-/GRMZM2G153722/-/-	53
BP	GO:0051188	cofactor biosynthetic process	63/3483	353/22306	0.138227	0.468029	Zm00001d000123/Zm00001d001970/Zm00001d002326/Zm00001d002358/Zm00001d002511/Zm00001d003462/Zm00001d005925/Zm00001d006107/Zm00001d006221/Zm00001d007318/Zm00001d007936/Zm00001d008230/Zm00001d008320/Zm00001d010920/Zm00001d010950/Zm00001d011835/Zm00001d011876/Zm00001d012510/Zm00001d014715/Zm00001d015366/Zm00001d020309/Zm00001d020771/Zm00001d021297/Zm00001d021310/Zm00001d023817/Zm00001d024612/Zm00001d0…	-/-/adenosylmethionine aminotransferase1/necrotic4/-/LIP1/-/pyruvate dehydrogenase3/triose phosphate isomerase2/-/-/-/-/-/-/-/elongated mesocotyl1/-/-/camouflage1/-/-/-/-/-/-/viviparous10/-/catalase2/-/-/-/DMAS1/-/lesion22/divinyl reductase1/pyruvate kinase1/-/-/-/-/-/-/-/phosphofructose kinase1/-/hexokinase2/-/-/-/-/-/-/LIP1P-2/-/-/-/-/brown midrib4/-/-/-/small kernel2	63
BP	GO:0045786	negative regulation of cell cycle	19/3483	94/22306	0.139039	0.470042	Zm00001d002056/Zm00001d002154/Zm00001d004709/Zm00001d007407/Zm00001d007585/Zm00001d018057/Zm00001d023279/Zm00001d024953/Zm00001d027585/Zm00001d031678/Zm00001d036531/Zm00001d040166/Zm00001d042639/Zm00001d042810/Zm00001d044630/Zm00001d045080/Zm00001d045354/Zm00001d047873/Zm00001d052695	-/meiotic recombination protein 11 homolog A/-/related to retinoblastoma1/-/-/-/-/cyclin-dependent kinase inhibitor3/retinoblastoma family3/-/-/-/-/-/origin recognition complex1/-/-/-	19
BP	GO:0000245	spliceosomal complex assembly	9/3483	39/22306	0.144053	0.484725	Zm00001d005406/Zm00001d011652/Zm00001d013548/Zm00001d014512/Zm00001d015248/Zm00001d019579/Zm00001d022243/Zm00001d028034/Zm00001d043745	-/-/-/-/-/-/-/-/-	9
BP	GO:0006094	gluconeogenesis	9/3483	39/22306	0.144053	0.484725	Zm00001d005925/Zm00001d006221/Zm00001d008314/Zm00001d008613/Zm00001d020771/Zm00001d021310/Zm00001d028562/Zm00001d037553/Zm00001d043194	-/triose phosphate isomerase2/-/-/-/-/-/-/-	9
BP	GO:0019319	hexose biosynthetic process	9/3483	39/22306	0.144053	0.484725	Zm00001d005925/Zm00001d006221/Zm00001d008314/Zm00001d008613/Zm00001d020771/Zm00001d021310/Zm00001d028562/Zm00001d037553/Zm00001d043194	-/triose phosphate isomerase2/-/-/-/-/-/-/-	9
BP	GO:0010876	lipid localization	26/3483	135/22306	0.146914	0.49144	Zm00001d006384/Zm00001d007034/Zm00001d008752/Zm00001d009337/Zm00001d012892/Zm00001d014188/Zm00001d014499/Zm00001d014895/Zm00001d020208/Zm00001d021972/Zm00001d024711/Zm00001d025153/Zm00001d028505/Zm00001d032279/Zm00001d032334/Zm00001d032980/Zm00001d034758/Zm00001d036233/Zm00001d040008/Zm00001d040259/Zm00001d040456/Zm00001d045956/Zm00001d046194/Zm00001d047527/Zm00001d051661/Zm00001d051854	-/-/-/-/-/-/-/-/-/-/-/-/-/-/-/-/-/-/-/-/-/-/-/-/-/-	26
BP	GO:0009735	response to cytokinin	13/3483	61/22306	0.146956	0.49144	Zm00001d001865/Zm00001d014192/Zm00001d014297/Zm00001d017977/Zm00001d028265/Zm00001d028562/Zm00001d031938/Zm00001d031961/Zm00001d037110/Zm00001d042066/Zm00001d042312/Zm00001d045738/Zm00001d047581	cytokinin response regulator1/-/histidine kinase3/histidine kinase1/cytokinin response regulator8/-/-/histidine-containing phosphotransfer protein1/-/cytokinin response regulator5/histidine kinase2/-/-	13
BP	GO:0048366	leaf development	13/3483	61/22306	0.146956	0.49144	Zm00001d004930/Zm00001d009520/Zm00001d016166/Zm00001d017742/Zm00001d017771/Zm00001d023767/Zm00001d028818/Zm00001d036296/Zm00001d037294/Zm00001d039495/Zm00001d042713/Zm00001d045944/Zm00001d050645	-/-/phosphoenolpyruvate carboxylase2/GRF-transcription factor 6/-/-/defective kernel1/enhancer of zeste1/-/-/-/-/-	13
BP	GO:0070897	DNA-templated transcriptional preinitiation complex assembly	13/3483	61/22306	0.146956	0.49144	Zm00001d009424/Zm00001d015886/Zm00001d016439/Zm00001d029473/Zm00001d037832/Zm00001d039729/Zm00001d046539/Zm00001d046579/Zm00001d047898/Zm00001d047966/Zm00001d049379/Zm00001d050616/Zm00001d053616	-/-/-/-/-/-/-/-/-/-/-/-/-	13
BP	GO:1901617	organic hydroxy compound biosynthetic process	34/3483	182/22306	0.148964	0.497387	Zm00001d001881/Zm00001d001974/Zm00001d007044/Zm00001d007936/Zm00001d012312/Zm00001d016463/Zm00001d016856/Zm00001d025545/Zm00001d026064/Zm00001d026514/Zm00001d027352/Zm00001d028024/Zm00001d028152/Zm00001d029810/Zm00001d033110/Zm00001d033180/Zm00001d033222/Zm00001d033551/Zm00001d033927/Zm00001d033945/Zm00001d034387/Zm00001d034516/Zm00001d037110/Zm00001d037522/Zm00001d037731/Zm00001d039363/Zm00001d0…	-/-/-/-/-/-/calmodulin binding protein1/zeaxanthin epoxidase2/-/-/-/-/-/-/-/brassinosteroid-deficient dwarf1/viviparous14/-/-/C2C2-GATA-transcription factor 34/aldehyde oxidase1/-/-/-/-/-/-/-/-/-/-/-/brown midrib3/small kernel2	34
BP	GO:0044839	cell cycle G2/M phase transition	8/3483	34/22306	0.149901	0.499746	Zm00001d002154/Zm00001d004709/Zm00001d018057/Zm00001d028143/Zm00001d042810/Zm00001d045080/Zm00001d047873/Zm00001d053930	meiotic recombination protein 11 homolog A/-/-/-/-/origin recognition complex1/-/-	8
BP	GO:0043549	regulation of kinase activity	36/3483	194/22306	0.15061	0.501339	Zm00001d001978/Zm00001d002662/Zm00001d002778/Zm00001d003401/Zm00001d005064/Zm00001d010656/Zm00001d012560/Zm00001d017392/Zm00001d017525/Zm00001d019681/Zm00001d020158/Zm00001d021584/Zm00001d023230/Zm00001d025449/Zm00001d026030/Zm00001d027585/Zm00001d027790/Zm00001d028514/Zm00001d033365/Zm00001d034055/Zm00001d035087/Zm00001d040381/Zm00001d045359/Zm00001d045967/Zm00001d047310/Zm00001d047728/Zm00001d0…	-/cyclin8/CK2 regulatory subunit B1/general regulatory factor1/-/cyclin1/cyclin7/-/-/-/-/-/-/-/-/cyclin-dependent kinase inhibitor3/-/MAP kinase kinase kinase11/-/-/acidic ribosomal protein P1a/-/-/-/-/-/-/-/-/-/autophagy13a/-/-/-/-/-	36
BP	GO:0006664	glycolipid metabolic process	17/3483	84/22306	0.153966	0.506174	Zm00001d005431/Zm00001d012034/Zm00001d012108/Zm00001d012118/Zm00001d016990/Zm00001d017654/Zm00001d022043/Zm00001d027485/Zm00001d029333/Zm00001d033149/Zm00001d036055/Zm00001d038389/Zm00001d042802/Zm00001d043842/Zm00001d044554/Zm00001d048835/Zm00001d053627	-/-/-/-/-/-/-/-/-/-/-/-/-/-/-/-/-	17
BP	GO:0002682	regulation of immune system process	10/3483	45/22306	0.154189	0.506174	Zm00001d004655/Zm00001d011401/Zm00001d014562/Zm00001d021498/Zm00001d031580/Zm00001d037381/Zm00001d038097/Zm00001d043194/Zm00001d044273/Zm00001d045784	-/-/-/-/-/-/-/-/-/-	10
BP	GO:0006505	GPI anchor metabolic process	10/3483	45/22306	0.154189	0.506174	Zm00001d012034/Zm00001d012118/Zm00001d016990/Zm00001d017654/Zm00001d027485/Zm00001d029333/Zm00001d036055/Zm00001d043842/Zm00001d044554/Zm00001d053627	-/-/-/-/-/-/-/-/-/-	10
BP	GO:0006506	GPI anchor biosynthetic process	10/3483	45/22306	0.154189	0.506174	Zm00001d012034/Zm00001d012118/Zm00001d016990/Zm00001d017654/Zm00001d027485/Zm00001d029333/Zm00001d036055/Zm00001d043842/Zm00001d044554/Zm00001d053627	-/-/-/-/-/-/-/-/-/-	10
BP	GO:0007093	mitotic cell cycle checkpoint	10/3483	45/22306	0.154189	0.506174	Zm00001d002154/Zm00001d004709/Zm00001d007585/Zm00001d018057/Zm00001d023279/Zm00001d042639/Zm00001d042810/Zm00001d044630/Zm00001d045080/Zm00001d047873	meiotic recombination protein 11 homolog A/-/-/-/-/-/-/-/origin recognition complex1/-	10
BP	GO:0031570	DNA integrity checkpoint	10/3483	45/22306	0.154189	0.506174	Zm00001d002056/Zm00001d002154/Zm00001d004709/Zm00001d018057/Zm00001d036531/Zm00001d040166/Zm00001d042810/Zm00001d045080/Zm00001d045354/Zm00001d047873	-/meiotic recombination protein 11 homolog A/-/-/-/-/-/origin recognition complex1/-/-	10
BP	GO:0032271	regulation of protein polymerization	10/3483	45/22306	0.154189	0.506174	Zm00001d007806/Zm00001d017106/Zm00001d018004/Zm00001d018484/Zm00001d029343/Zm00001d033414/Zm00001d035183/Zm00001d044802/Zm00001d045323/Zm00001d052273	-/-/Rho-related protein from plants 1/-/-/-/reaction to X. oryzae1/Rho-related protein from plants 5/double B-box zinc finger protein11/Rho-related protein from plants 8	10
BP	GO:0046467	membrane lipid biosynthetic process	25/3483	130/22306	0.154286	0.506174	Zm00001d000228/Zm00001d011503/Zm00001d012034/Zm00001d012108/Zm00001d012118/Zm00001d014445/Zm00001d014446/Zm00001d015477/Zm00001d016926/Zm00001d016990/Zm00001d017574/Zm00001d017654/Zm00001d022043/Zm00001d027485/Zm00001d028534/Zm00001d029333/Zm00001d033149/Zm00001d036055/Zm00001d038389/Zm00001d042802/Zm00001d043842/Zm00001d044175/Zm00001d044554/Zm00001d048835/Zm00001d053627	-/-/-/-/-/-/-/-/-/-/-/-/-/-/-/-/-/-/-/-/-/-/-/-/-	25
BP	GO:0030004	cellular monovalent inorganic cation homeostasis	12/3483	56/22306	0.154526	0.506174	Zm00001d002006/Zm00001d012446/Zm00001d020892/Zm00001d021000/Zm00001d021844/Zm00001d022504/Zm00001d027265/Zm00001d028330/Zm00001d028436/Zm00001d035093/Zm00001d041590/Zm00001d047910	plasma-membrane H+ATPase2/-/-/-/-/-/-/-/-/-/rotten ear2/-	12
BP	GO:0046486	glycerolipid metabolic process	44/3483	242/22306	0.154546	0.506174	Zm00001d002085/Zm00001d007442/Zm00001d007638/Zm00001d008310/Zm00001d012034/Zm00001d012118/Zm00001d012701/Zm00001d013090/Zm00001d016822/Zm00001d016990/Zm00001d017654/Zm00001d018013/Zm00001d027485/Zm00001d028261/Zm00001d028366/Zm00001d028698/Zm00001d028731/Zm00001d029211/Zm00001d029333/Zm00001d032238/Zm00001d033110/Zm00001d033645/Zm00001d035030/Zm00001d036055/Zm00001d036631/Zm00001d037332/Zm00001d0…	-/-/phospholipid synthesis1/-/-/-/-/-/-/-/-/-/-/-/-/-/-/-/-/-/-/-/-/-/-/-/-/phospholipase D13/-/-/phospholipase D1/-/-/-/-/-/-/-/-/-/-/GRMZM2G153722/-/-	44
BP	GO:0006304	DNA modification	7/3483	29/22306	0.155459	0.506174	Zm00001d018977/Zm00001d021145/Zm00001d031291/Zm00001d044917/Zm00001d048095/Zm00001d048516/Zm00001d052353	DNA methyl transferase1/-/-/-/-/DNA methyl transferase3/-	7
BP	GO:0006465	signal peptide processing	7/3483	29/22306	0.155459	0.506174	Zm00001d003539/Zm00001d013195/Zm00001d013642/Zm00001d016036/Zm00001d021401/Zm00001d031933/Zm00001d051740	-/-/-/-/-/-/-	7
BP	GO:0006783	heme biosynthetic process	7/3483	29/22306	0.155459	0.506174	Zm00001d002358/Zm00001d002511/Zm00001d014715/Zm00001d015366/Zm00001d027950/Zm00001d029074/Zm00001d048318	necrotic4/-/-/camouflage1/-/lesion22/-	7
BP	GO:1903827	regulation of cellular protein localization	7/3483	29/22306	0.155459	0.506174	Zm00001d007943/Zm00001d014913/Zm00001d018657/Zm00001d032575/Zm00001d034914/Zm00001d035889/Zm00001d054076	-/-/-/-/-/-/-	7
BP	GO:0008652	cellular amino acid biosynthetic process	50/3483	278/22306	0.155566	0.506174	Zm00001d002051/Zm00001d003395/Zm00001d006214/Zm00001d009738/Zm00001d013223/Zm00001d016006/Zm00001d017676/Zm00001d017958/Zm00001d020908/Zm00001d021956/Zm00001d022388/Zm00001d023429/Zm00001d023724/Zm00001d024393/Zm00001d025652/Zm00001d026501/Zm00001d027319/Zm00001d028220/Zm00001d028464/Zm00001d028536/Zm00001d028662/Zm00001d028712/Zm00001d029548/Zm00001d029848/Zm00001d030760/Zm00001d031128/Zm00001d0…	-/anthranilate synthase homolog1/-/-/-/-/-/glutamine synthetase4/-/GNAT-transcription factor 33/ferredoxin-dependent glutamate synthase1/-/-/-/-/glutamine synthetase1/-/-/-/-/-/-/csu323/-/-/-/-/-/-/-/-/-/-/-/-/-/-/-/-/-/-/ARID-transcription factor 10/-/-/blue fluorescent1/GNAT-transcription factor 39/-/aspartate kinase-homoserine dehydrogenase1/glutamine synthetase5/-	50
BP	GO:0009791	post-embryonic development	80/3483	460/22306	0.15956	0.510585	Zm00001d000176/Zm00001d002144/Zm00001d004993/Zm00001d005107/Zm00001d005281/Zm00001d007675/Zm00001d007905/Zm00001d008743/Zm00001d008846/Zm00001d009452/Zm00001d011301/Zm00001d011595/Zm00001d012052/Zm00001d012079/Zm00001d012212/Zm00001d013421/Zm00001d013891/Zm00001d014297/Zm00001d015837/Zm00001d017427/Zm00001d017742/Zm00001d017982/Zm00001d019881/Zm00001d019907/Zm00001d020874/Zm00001d021057/Zm00001d0…	-/-/-/-/-/-/-/-/-/-/-/-/-/-/gibberellin 20-oxidase5/-/-/histidine kinase3/-/-/GRF-transcription factor 6/-/-/set domain gene128/CCAAT-HAP5-transcription factor 516/Zea mays MADS7/-/C2C2-YABBY-transcription factor 4/-/-/-/-/-/dicer-like4/dicer-like 101/-/-/-/-/-/defective kernel1/-/-/-/-/-/embryo specific2/enhancer of zeste1/-/-/-/-/-/trehalose-6-phosphate synthase12/-/-/Glutamine--tRNA ligase cyt…	80
BP	GO:0000303	response to superoxide	6/3483	24/22306	0.16029	0.510585	Zm00001d002611/Zm00001d005812/Zm00001d025106/Zm00001d029170/Zm00001d031908/Zm00001d052101	-/-/-/superoxide dismutase4/-/chaperonin10	6
BP	GO:0000305	response to oxygen radical	6/3483	24/22306	0.16029	0.510585	Zm00001d002611/Zm00001d005812/Zm00001d025106/Zm00001d029170/Zm00001d031908/Zm00001d052101	-/-/-/superoxide dismutase4/-/chaperonin10	6
BP	GO:0019430	removal of superoxide radicals	6/3483	24/22306	0.16029	0.510585	Zm00001d002611/Zm00001d005812/Zm00001d025106/Zm00001d029170/Zm00001d031908/Zm00001d052101	-/-/-/superoxide dismutase4/-/chaperonin10	6
BP	GO:0044774	mitotic DNA integrity checkpoint	6/3483	24/22306	0.16029	0.510585	Zm00001d002154/Zm00001d004709/Zm00001d018057/Zm00001d042810/Zm00001d045080/Zm00001d047873	meiotic recombination protein 11 homolog A/-/-/-/origin recognition complex1/-	6
BP	GO:0071450	cellular response to oxygen radical	6/3483	24/22306	0.16029	0.510585	Zm00001d002611/Zm00001d005812/Zm00001d025106/Zm00001d029170/Zm00001d031908/Zm00001d052101	-/-/-/superoxide dismutase4/-/chaperonin10	6
BP	GO:0071451	cellular response to superoxide	6/3483	24/22306	0.16029	0.510585	Zm00001d002611/Zm00001d005812/Zm00001d025106/Zm00001d029170/Zm00001d031908/Zm00001d052101	-/-/-/superoxide dismutase4/-/chaperonin10	6
BP	GO:0051338	regulation of transferase activity	42/3483	231/22306	0.160984	0.510585	Zm00001d001978/Zm00001d002662/Zm00001d002778/Zm00001d003401/Zm00001d005064/Zm00001d010656/Zm00001d012560/Zm00001d016034/Zm00001d017392/Zm00001d017525/Zm00001d019681/Zm00001d020158/Zm00001d021584/Zm00001d022231/Zm00001d023230/Zm00001d025449/Zm00001d026030/Zm00001d026313/Zm00001d026612/Zm00001d027585/Zm00001d027790/Zm00001d028514/Zm00001d032165/Zm00001d033365/Zm00001d034055/Zm00001d035087/Zm00001d0…	-/cyclin8/CK2 regulatory subunit B1/general regulatory factor1/-/cyclin1/cyclin7/cell division cycle202/-/-/-/-/-/-/-/-/-/-/-/cyclin-dependent kinase inhibitor3/-/MAP kinase kinase kinase11/-/-/-/acidic ribosomal protein P1a/-/-/-/-/-/-/-/-/-/-/autophagy13a/-/-/-/-/-	42
BP	GO:0070925	organelle assembly	43/3483	237/22306	0.161252	0.510585	Zm00001d000178/Zm00001d002186/Zm00001d002243/Zm00001d003274/Zm00001d005089/Zm00001d007953/Zm00001d013910/Zm00001d014808/Zm00001d015020/Zm00001d015692/Zm00001d015955/Zm00001d017719/Zm00001d018624/Zm00001d022114/Zm00001d024292/Zm00001d025793/Zm00001d026676/Zm00001d027421/Zm00001d028073/Zm00001d032526/Zm00001d033368/Zm00001d034680/Zm00001d037084/Zm00001d038383/Zm00001d038475/Zm00001d038646/Zm00001d0…	autophagy3/divergent spindle1/-/-/-/-/-/-/-/-/-/-/kinesin-related protein11/-/-/-/-/-/-/-/-/-/-/-/ribosome export associated1/-/-/-/-/-/60S ribosomal protein L5-1 homolog a/centromere protein C 1/-/autophagy1c/-/-/-/-/-/-/autophagy101/autophagy13a/autophagy11a	43
BP	GO:0005977	glycogen metabolic process	9/3483	40/22306	0.161635	0.510585	Zm00001d003817/Zm00001d006309/Zm00001d011301/Zm00001d013428/Zm00001d022206/Zm00001d022510/Zm00001d033746/Zm00001d042842/Zm00001d053741	starch branching enzyme3/UDP-glucose pyrophosphorylase1/-/phosphoglucomutase2/-/-/phosphoglucomutase1/starch phoshorylase2/autophagy11a	9
BP	GO:0006112	energy reserve metabolic process	9/3483	40/22306	0.161635	0.510585	Zm00001d003817/Zm00001d006309/Zm00001d011301/Zm00001d013428/Zm00001d022206/Zm00001d022510/Zm00001d033746/Zm00001d042842/Zm00001d053741	starch branching enzyme3/UDP-glucose pyrophosphorylase1/-/phosphoglucomutase2/-/-/phosphoglucomutase1/starch phoshorylase2/autophagy11a	9
BP	GO:0006637	acyl-CoA metabolic process	9/3483	40/22306	0.161635	0.510585	Zm00001d006107/Zm00001d017258/Zm00001d019850/Zm00001d021908/Zm00001d033945/Zm00001d037006/Zm00001d037731/Zm00001d047906/Zm00001d048337	pyruvate dehydrogenase3/-/-/-/C2C2-GATA-transcription factor 34/-/-/-/-	9
BP	GO:0035383	thioester metabolic process	9/3483	40/22306	0.161635	0.510585	Zm00001d006107/Zm00001d017258/Zm00001d019850/Zm00001d021908/Zm00001d033945/Zm00001d037006/Zm00001d037731/Zm00001d047906/Zm00001d048337	pyruvate dehydrogenase3/-/-/-/C2C2-GATA-transcription factor 34/-/-/-/-	9
BP	GO:0001558	regulation of cell growth	4/3483	14/22306	0.163204	0.510585	Zm00001d005064/Zm00001d023230/Zm00001d028818/Zm00001d052327	-/-/defective kernel1/-	4
BP	GO:0006474	N-terminal protein amino acid acetylation	4/3483	14/22306	0.163204	0.510585	Zm00001d018218/Zm00001d026391/Zm00001d038006/Zm00001d052009	GNAT-transcription factor 26/GNAT-transcription factor 43/-/-	4
BP	GO:0007080	mitotic metaphase plate congression	4/3483	14/22306	0.163204	0.510585	Zm00001d002056/Zm00001d042639/Zm00001d044220/Zm00001d045354	-/-/centromere protein C 1/-	4
BP	GO:0009448	gamma-aminobutyric acid metabolic process	4/3483	14/22306	0.163204	0.510585	Zm00001d002326/Zm00001d037507/Zm00001d049380/Zm00001d053776	adenosylmethionine aminotransferase1/-/-/-	4
BP	GO:0046039	GTP metabolic process	4/3483	14/22306	0.163204	0.510585	Zm00001d001970/Zm00001d023833/Zm00001d026515/Zm00001d034320	-/-/viviparous10/-	4
BP	GO:0051098	regulation of binding	4/3483	14/22306	0.163204	0.510585	Zm00001d007943/Zm00001d014913/Zm00001d018657/Zm00001d032575	-/-/-/-	4
BP	GO:0051101	regulation of DNA binding	4/3483	14/22306	0.163204	0.510585	Zm00001d007943/Zm00001d014913/Zm00001d018657/Zm00001d032575	-/-/-/-	4
BP	GO:0051205	protein insertion into membrane	4/3483	14/22306	0.163204	0.510585	Zm00001d012861/Zm00001d034823/Zm00001d039852/Zm00001d045181	-/-/-/-	4
BP	GO:0051315	attachment of mitotic spindle microtubules to kinetochore	4/3483	14/22306	0.163204	0.510585	Zm00001d002056/Zm00001d042639/Zm00001d044220/Zm00001d045354	-/-/centromere protein C 1/-	4
BP	GO:0070734	histone H3-K27 methylation	4/3483	14/22306	0.163204	0.510585	Zm00001d012751/Zm00001d015265/Zm00001d036296/Zm00001d038812	Homeobox-transcription factor 9/Homeobox-transcription factor 28/enhancer of zeste1/Homeobox-transcription factor 92	4
BP	GO:0071322	cellular response to carbohydrate stimulus	4/3483	14/22306	0.163204	0.510585	Zm00001d031908/Zm00001d038728/Zm00001d043775/Zm00001d044551	-/trehalose-6-phosphate synthase12/-/-	4
BP	GO:0000266	mitochondrial fission	5/3483	19/22306	0.163519	0.510585	Zm00001d009504/Zm00001d012027/Zm00001d017979/Zm00001d033751/Zm00001d044757	-/-/-/-/-	5
BP	GO:0016233	telomere capping	5/3483	19/22306	0.163519	0.510585	Zm00001d002154/Zm00001d005812/Zm00001d026612/Zm00001d047427/Zm00001d050612	meiotic recombination protein 11 homolog A/-/-/-/-	5
BP	GO:0045039	protein import into mitochondrial inner membrane	5/3483	19/22306	0.163519	0.510585	Zm00001d003846/Zm00001d004051/Zm00001d012930/Zm00001d017847/Zm00001d027699	-/-/-/-/-	5
BP	GO:0072334	UDP-galactose transmembrane transport	5/3483	19/22306	0.163519	0.510585	Zm00001d002941/Zm00001d005006/Zm00001d006679/Zm00001d021993/Zm00001d046467	-/-/-/-/-	5
BP	GO:0006099	tricarboxylic acid cycle	17/3483	85/22306	0.16603	0.515454	Zm00001d003083/Zm00001d003923/Zm00001d003947/Zm00001d004564/Zm00001d014030/Zm00001d016166/Zm00001d017258/Zm00001d018758/Zm00001d021908/Zm00001d024952/Zm00001d025258/Zm00001d032187/Zm00001d032695/Zm00001d037006/Zm00001d037294/Zm00001d037731/Zm00001d048358	-/-/-/-/-/phosphoenolpyruvate carboxylase2/-/succinate dehydrogenase1/-/aconitase2/-/-/malate dehydrogenase4/-/-/-/aconitase3	17
BP	GO:0006101	citrate metabolic process	17/3483	85/22306	0.16603	0.515454	Zm00001d003083/Zm00001d003923/Zm00001d003947/Zm00001d004564/Zm00001d014030/Zm00001d016166/Zm00001d017258/Zm00001d018758/Zm00001d021908/Zm00001d024952/Zm00001d025258/Zm00001d032187/Zm00001d032695/Zm00001d037006/Zm00001d037294/Zm00001d037731/Zm00001d048358	-/-/-/-/-/phosphoenolpyruvate carboxylase2/-/succinate dehydrogenase1/-/aconitase2/-/-/malate dehydrogenase4/-/-/-/aconitase3	17
BP	GO:0071804	cellular potassium ion transport	17/3483	85/22306	0.16603	0.515454	Zm00001d001788/Zm00001d002359/Zm00001d011913/Zm00001d017925/Zm00001d018339/Zm00001d019631/Zm00001d020325/Zm00001d020892/Zm00001d021844/Zm00001d022485/Zm00001d022504/Zm00001d026289/Zm00001d026645/Zm00001d028330/Zm00001d036622/Zm00001d037970/Zm00001d043765	-/-/-/-/-/-/-/-/-/-/-/-/-/-/-/-/-	17
BP	GO:0071805	potassium ion transmembrane transport	17/3483	85/22306	0.16603	0.515454	Zm00001d001788/Zm00001d002359/Zm00001d011913/Zm00001d017925/Zm00001d018339/Zm00001d019631/Zm00001d020325/Zm00001d020892/Zm00001d021844/Zm00001d022485/Zm00001d022504/Zm00001d026289/Zm00001d026645/Zm00001d028330/Zm00001d036622/Zm00001d037970/Zm00001d043765	-/-/-/-/-/-/-/-/-/-/-/-/-/-/-/-/-	17
BP	GO:0033047	regulation of mitotic sister chromatid segregation	8/3483	35/22306	0.169319	0.524913	Zm00001d007585/Zm00001d007943/Zm00001d018657/Zm00001d023279/Zm00001d037979/Zm00001d037981/Zm00001d042639/Zm00001d044630	-/-/-/-/-/-/-/-	8
BP	GO:0046488	phosphatidylinositol metabolic process	30/3483	161/22306	0.170235	0.525208	Zm00001d008310/Zm00001d012034/Zm00001d012118/Zm00001d013090/Zm00001d016822/Zm00001d016990/Zm00001d017654/Zm00001d027485/Zm00001d028261/Zm00001d028366/Zm00001d029211/Zm00001d029333/Zm00001d032238/Zm00001d033110/Zm00001d033645/Zm00001d035030/Zm00001d036055/Zm00001d036631/Zm00001d037332/Zm00001d038830/Zm00001d043842/Zm00001d044554/Zm00001d046972/Zm00001d047739/Zm00001d048049/Zm00001d048258/Zm00001d0…	-/-/-/-/-/-/-/-/-/-/-/-/-/-/-/-/-/-/-/-/-/-/-/-/-/-/-/GRMZM2G153722/-/-	30
BP	GO:0006119	oxidative phosphorylation	15/3483	74/22306	0.171014	0.525208	Zm00001d011750/Zm00001d014772/Zm00001d018758/Zm00001d025286/Zm00001d028773/Zm00001d033753/Zm00001d034244/Zm00001d038658/Zm00001d043194/Zm00001d043834/Zm00001d044459/Zm00001d047720/Zm00001d048102/Zm00001d050696/Zm00001d052436	-/-/succinate dehydrogenase1/iron-sulfur protein1/-/-/-/-/-/-/-/-/-/-/-	15
BP	GO:0032527	protein exit from endoplasmic reticulum	10/3483	46/22306	0.171111	0.525208	Zm00001d000390/Zm00001d014124/Zm00001d016142/Zm00001d021498/Zm00001d027707/Zm00001d030620/Zm00001d035889/Zm00001d044551/Zm00001d045133/Zm00001d054076	-/-/-/-/-/-/-/-/-/-	10
BP	GO:0033045	regulation of sister chromatid segregation	10/3483	46/22306	0.171111	0.525208	Zm00001d007585/Zm00001d007943/Zm00001d014913/Zm00001d018657/Zm00001d023279/Zm00001d032575/Zm00001d037979/Zm00001d037981/Zm00001d042639/Zm00001d044630	-/-/-/-/-/-/-/-/-/-	10
BP	GO:0033108	mitochondrial respiratory chain complex assembly	10/3483	46/22306	0.171111	0.525208	Zm00001d011750/Zm00001d027672/Zm00001d028485/Zm00001d031975/Zm00001d034244/Zm00001d035879/Zm00001d036839/Zm00001d045181/Zm00001d052436/Zm00001d053084	-/-/-/-/-/-/-/-/-/-	10
BP	GO:0046364	monosaccharide biosynthetic process	10/3483	46/22306	0.171111	0.525208	Zm00001d005925/Zm00001d006221/Zm00001d008314/Zm00001d008613/Zm00001d020771/Zm00001d021310/Zm00001d028562/Zm00001d033110/Zm00001d037553/Zm00001d043194	-/triose phosphate isomerase2/-/-/-/-/-/-/-/-	10
BP	GO:0051983	regulation of chromosome segregation	10/3483	46/22306	0.171111	0.525208	Zm00001d007585/Zm00001d007943/Zm00001d014913/Zm00001d018657/Zm00001d023279/Zm00001d032575/Zm00001d037979/Zm00001d037981/Zm00001d042639/Zm00001d044630	-/-/-/-/-/-/-/-/-/-	10
BP	GO:0009247	glycolipid biosynthetic process	16/3483	80/22306	0.175062	0.536575	Zm00001d012034/Zm00001d012108/Zm00001d012118/Zm00001d016990/Zm00001d017654/Zm00001d022043/Zm00001d027485/Zm00001d029333/Zm00001d033149/Zm00001d036055/Zm00001d038389/Zm00001d042802/Zm00001d043842/Zm00001d044554/Zm00001d048835/Zm00001d053627	-/-/-/-/-/-/-/-/-/-/-/-/-/-/-/-	16
BP	GO:0010073	meristem maintenance	7/3483	30/22306	0.177115	0.541339	Zm00001d002510/Zm00001d015194/Zm00001d025830/Zm00001d028370/Zm00001d045944/Zm00001d046485/Zm00001d049190	-/-/dicer-like4/-/-/-/minichromosome maintenance7	7
BP	GO:0030838	positive regulation of actin filament polymerization	7/3483	30/22306	0.177115	0.541339	Zm00001d007806/Zm00001d017106/Zm00001d018004/Zm00001d018484/Zm00001d035183/Zm00001d044802/Zm00001d052273	-/-/Rho-related protein from plants 1/-/reaction to X. oryzae1/Rho-related protein from plants 5/Rho-related protein from plants 8	7
BP	GO:0000910	cytokinesis	17/3483	86/22306	0.178574	0.54426	Zm00001d002056/Zm00001d005250/Zm00001d005269/Zm00001d021731/Zm00001d023760/Zm00001d023908/Zm00001d024953/Zm00001d027412/Zm00001d030121/Zm00001d034082/Zm00001d034166/Zm00001d034770/Zm00001d042262/Zm00001d044273/Zm00001d045354/Zm00001d049510/Zm00001d053930	-/cellulose synthase9/-/-/chitin synthase homolog1/-/-/dicer-like 101/roothairless6/-/-/cellulose synthase6/-/-/-/-/-	17
BP	GO:1903509	liposaccharide metabolic process	17/3483	86/22306	0.178574	0.54426	Zm00001d005431/Zm00001d012034/Zm00001d012108/Zm00001d012118/Zm00001d016990/Zm00001d017654/Zm00001d022043/Zm00001d027485/Zm00001d029333/Zm00001d033149/Zm00001d036055/Zm00001d038389/Zm00001d042802/Zm00001d043842/Zm00001d044554/Zm00001d048835/Zm00001d053627	-/-/-/-/-/-/-/-/-/-/-/-/-/-/-/-/-	17
BP	GO:0045088	regulation of innate immune response	9/3483	41/22306	0.180184	0.545464	Zm00001d004655/Zm00001d011401/Zm00001d014562/Zm00001d021498/Zm00001d031580/Zm00001d037381/Zm00001d038097/Zm00001d044273/Zm00001d045784	-/-/-/-/-/-/-/-/-	9
BP	GO:0050776	regulation of immune response	9/3483	41/22306	0.180184	0.545464	Zm00001d004655/Zm00001d011401/Zm00001d014562/Zm00001d021498/Zm00001d031580/Zm00001d037381/Zm00001d038097/Zm00001d044273/Zm00001d045784	-/-/-/-/-/-/-/-/-	9
BP	GO:0051495	positive regulation of cytoskeleton organization	9/3483	41/22306	0.180184	0.545464	Zm00001d007806/Zm00001d017106/Zm00001d018004/Zm00001d018484/Zm00001d033414/Zm00001d035183/Zm00001d042097/Zm00001d044802/Zm00001d052273	-/-/Rho-related protein from plants 1/-/-/reaction to X. oryzae1/-/Rho-related protein from plants 5/Rho-related protein from plants 8	9
BP	GO:1902905	positive regulation of supramolecular fiber organization	9/3483	41/22306	0.180184	0.545464	Zm00001d007806/Zm00001d017106/Zm00001d018004/Zm00001d018484/Zm00001d033414/Zm00001d035183/Zm00001d042097/Zm00001d044802/Zm00001d052273	-/-/Rho-related protein from plants 1/-/-/reaction to X. oryzae1/-/Rho-related protein from plants 5/Rho-related protein from plants 8	9
BP	GO:0010639	negative regulation of organelle organization	14/3483	69/22306	0.180479	0.545464	Zm00001d007585/Zm00001d013440/Zm00001d021145/Zm00001d023279/Zm00001d024953/Zm00001d029343/Zm00001d037497/Zm00001d042639/Zm00001d044358/Zm00001d044630/Zm00001d045323/Zm00001d047427/Zm00001d049190/Zm00001d052353	-/-/-/-/-/-/-/-/-/-/double B-box zinc finger protein11/-/minichromosome maintenance7/-	14
BP	GO:0019751	polyol metabolic process	14/3483	69/22306	0.180479	0.545464	Zm00001d001974/Zm00001d002085/Zm00001d006221/Zm00001d021310/Zm00001d026514/Zm00001d027445/Zm00001d033110/Zm00001d033551/Zm00001d033795/Zm00001d033927/Zm00001d037110/Zm00001d037731/Zm00001d044175/Zm00001d048201	-/-/triose phosphate isomerase2/-/-/-/-/-/-/-/-/-/-/-	14
BP	GO:0009060	aerobic respiration	24/3483	127/22306	0.182592	0.550736	Zm00001d003083/Zm00001d003923/Zm00001d003947/Zm00001d004564/Zm00001d014030/Zm00001d016166/Zm00001d017258/Zm00001d017727/Zm00001d018758/Zm00001d021908/Zm00001d024952/Zm00001d025258/Zm00001d025286/Zm00001d032187/Zm00001d032695/Zm00001d034244/Zm00001d037006/Zm00001d037294/Zm00001d037731/Zm00001d044459/Zm00001d048102/Zm00001d048358/Zm00001d050696/Zm00001d052436	-/-/-/-/-/phosphoenolpyruvate carboxylase2/-/alternative oxidase1/succinate dehydrogenase1/-/aconitase2/-/iron-sulfur protein1/-/malate dehydrogenase4/-/-/-/-/-/-/aconitase3/-/-	24
BP	GO:0099402	plant organ development	40/3483	222/22306	0.183282	0.550736	Zm00001d004930/Zm00001d006700/Zm00001d007158/Zm00001d008743/Zm00001d008846/Zm00001d009520/Zm00001d016166/Zm00001d017742/Zm00001d017771/Zm00001d019881/Zm00001d020512/Zm00001d021057/Zm00001d021863/Zm00001d022324/Zm00001d023767/Zm00001d023791/Zm00001d024205/Zm00001d028370/Zm00001d028818/Zm00001d029272/Zm00001d033792/Zm00001d036090/Zm00001d036296/Zm00001d037001/Zm00001d037294/Zm00001d038850/Zm00001d0…	-/mTERF-domain protein9/-/-/-/-/phosphoenolpyruvate carboxylase2/GRF-transcription factor 6/-/-/-/Zea mays MADS7/C2C2-YABBY-transcription factor 4/-/-/-/-/-/defective kernel1/-/-/-/enhancer of zeste1/-/-/-/-/-/Glutamine--tRNA ligase cytoplasmic1/-/-/-/-/-/-/-/MADS-transcription factor 76/-/minichromosome maintenance7/-	40
BP	GO:0051726	regulation of cell cycle	63/3483	361/22306	0.18415	0.550736	Zm00001d002056/Zm00001d002154/Zm00001d002662/Zm00001d004709/Zm00001d005269/Zm00001d006759/Zm00001d007407/Zm00001d007585/Zm00001d007943/Zm00001d009791/Zm00001d010656/Zm00001d012560/Zm00001d013371/Zm00001d013575/Zm00001d014913/Zm00001d016846/Zm00001d017128/Zm00001d017392/Zm00001d018057/Zm00001d018657/Zm00001d019681/Zm00001d020158/Zm00001d022205/Zm00001d023279/Zm00001d023760/Zm00001d023908/Zm00001d0…	-/meiotic recombination protein 11 homolog A/cyclin8/-/-/-/related to retinoblastoma1/-/-/-/cyclin1/cyclin7/-/-/-/-/-/-/-/-/-/-/-/-/chitin synthase homolog1/-/-/-/cyclin-dependent kinase inhibitor3/E2F-DP-transcription factor 219/-/-/methyl binding domain119/retinoblastoma family3/-/-/-/CK2 protein kinase alpha 2/-/-/-/-/-/-/-/MYB-related-transcription factor 22/-/-/-/-/-/-/origin recognition com…	63
BP	GO:0006074	(1->3)-beta-D-glucan metabolic process	6/3483	25/22306	0.184765	0.550736	Zm00001d014865/Zm00001d014866/Zm00001d018562/Zm00001d027392/Zm00001d030266/Zm00001d044584	-/-/-/-/-/-	6
BP	GO:0006075	(1->3)-beta-D-glucan biosynthetic process	6/3483	25/22306	0.184765	0.550736	Zm00001d014865/Zm00001d014866/Zm00001d018562/Zm00001d027392/Zm00001d030266/Zm00001d044584	-/-/-/-/-/-	6
BP	GO:0016121	carotene catabolic process	6/3483	25/22306	0.184765	0.550736	Zm00001d017766/Zm00001d023690/Zm00001d033222/Zm00001d042076/Zm00001d048373/Zm00001d051556	nine-cis-epoxycarotenoid dioxygenase8/-/viviparous14/-/white cap1/nine-cis-epoxycarotenoid dioxygenase6	6
BP	GO:0033499	galactose catabolic process via UDP-galactose	6/3483	25/22306	0.184765	0.550736	Zm00001d002377/Zm00001d018902/Zm00001d026311/Zm00001d032346/Zm00001d034733/Zm00001d035212	-/-/-/-/-/-	6
BP	GO:0044728	DNA methylation or demethylation	6/3483	25/22306	0.184765	0.550736	Zm00001d018977/Zm00001d021145/Zm00001d031291/Zm00001d044917/Zm00001d048516/Zm00001d052353	DNA methyl transferase1/-/-/-/DNA methyl transferase3/-	6
BP	GO:0046247	terpene catabolic process	6/3483	25/22306	0.184765	0.550736	Zm00001d017766/Zm00001d023690/Zm00001d033222/Zm00001d042076/Zm00001d048373/Zm00001d051556	nine-cis-epoxycarotenoid dioxygenase8/-/viviparous14/-/white cap1/nine-cis-epoxycarotenoid dioxygenase6	6
BP	GO:0071695	anatomical structure maturation	6/3483	25/22306	0.184765	0.550736	Zm00001d007158/Zm00001d008743/Zm00001d027412/Zm00001d031494/Zm00001d037110/Zm00001d040724	-/-/dicer-like 101/-/-/-	6
BP	GO:0030003	cellular cation homeostasis	29/3483	157/22306	0.187978	0.551499	Zm00001d002006/Zm00001d002022/Zm00001d007229/Zm00001d008911/Zm00001d010324/Zm00001d012446/Zm00001d017427/Zm00001d020892/Zm00001d021000/Zm00001d021844/Zm00001d022504/Zm00001d026479/Zm00001d027265/Zm00001d028330/Zm00001d028436/Zm00001d029034/Zm00001d029129/Zm00001d031418/Zm00001d034035/Zm00001d035093/Zm00001d036563/Zm00001d038123/Zm00001d039379/Zm00001d041590/Zm00001d042939/Zm00001d045944/Zm00001d0…	plasma-membrane H+ATPase2/calcium exchanger2/-/-/-/-/-/-/-/-/-/-/-/-/-/-/-/-/glutathione transporter1/-/-/-/-/rotten ear2/-/-/calcium pump3/-/-	29
BP	GO:0080134	regulation of response to stress	32/3483	175/22306	0.189768	0.551499	Zm00001d000228/Zm00001d004655/Zm00001d005812/Zm00001d007938/Zm00001d011401/Zm00001d013757/Zm00001d014445/Zm00001d014446/Zm00001d014562/Zm00001d014977/Zm00001d015053/Zm00001d016926/Zm00001d017809/Zm00001d018057/Zm00001d018243/Zm00001d018902/Zm00001d021498/Zm00001d031580/Zm00001d034161/Zm00001d036531/Zm00001d037381/Zm00001d038097/Zm00001d041083/Zm00001d041092/Zm00001d042302/Zm00001d043194/Zm00001d0…	-/-/-/-/-/-/-/-/-/brahma1/terpene synthase2/-/-/-/-/-/-/-/SnRK2 serine threonine protein kinase8/-/-/-/-/-/-/-/-/-/-/-/chaperonin10/-	32
BP	GO:0006206	pyrimidine nucleobase metabolic process	8/3483	36/22306	0.189805	0.551499	Zm00001d011855/Zm00001d017790/Zm00001d017966/Zm00001d019054/Zm00001d021844/Zm00001d028330/Zm00001d037208/Zm00001d041620	-/-/-/-/-/-/-/-	8
BP	GO:0030970	retrograde protein transport, ER to cytosol	8/3483	36/22306	0.189805	0.551499	Zm00001d000390/Zm00001d014124/Zm00001d016142/Zm00001d021498/Zm00001d027707/Zm00001d030620/Zm00001d044551/Zm00001d045133	-/-/-/-/-/-/-/-	8
BP	GO:0045732	positive regulation of protein catabolic process	8/3483	36/22306	0.189805	0.551499	Zm00001d003207/Zm00001d006011/Zm00001d015886/Zm00001d025750/Zm00001d028285/Zm00001d031178/Zm00001d050090/Zm00001d050616	-/-/-/-/-/-/-/-	8
BP	GO:0051306	mitotic sister chromatid separation	8/3483	36/22306	0.189805	0.551499	Zm00001d006499/Zm00001d007585/Zm00001d021635/Zm00001d023279/Zm00001d037979/Zm00001d037981/Zm00001d042639/Zm00001d044630	-/-/-/-/-/-/-/-	8
BP	GO:1903513	endoplasmic reticulum to cytosol transport	8/3483	36/22306	0.189805	0.551499	Zm00001d000390/Zm00001d014124/Zm00001d016142/Zm00001d021498/Zm00001d027707/Zm00001d030620/Zm00001d044551/Zm00001d045133	-/-/-/-/-/-/-/-	8
BP	GO:0010109	regulation of photosynthesis	5/3483	20/22306	0.191708	0.551499	Zm00001d017818/Zm00001d021261/Zm00001d038894/Zm00001d044525/Zm00001d046971	-/-/-/-/-	5
BP	GO:0043467	regulation of generation of precursor metabolites and energy	5/3483	20/22306	0.191708	0.551499	Zm00001d017818/Zm00001d033792/Zm00001d038894/Zm00001d043194/Zm00001d046971	-/-/-/-/-	5
BP	GO:0009251	glucan catabolic process	11/3483	53/22306	0.195908	0.551499	Zm00001d004438/Zm00001d022206/Zm00001d027309/Zm00001d032333/Zm00001d034015/Zm00001d042507/Zm00001d042842/Zm00001d043309/Zm00001d044693/Zm00001d053741/Zm00001d053982	pullulanase-type starch debranching enzyme1/-/-/-/exoglucanase1/-/starch phoshorylase2/-/-/autophagy11a/-	11
BP	GO:0033014	tetrapyrrole biosynthetic process	11/3483	53/22306	0.195908	0.551499	Zm00001d002358/Zm00001d002511/Zm00001d008230/Zm00001d011876/Zm00001d014715/Zm00001d015366/Zm00001d027950/Zm00001d029074/Zm00001d029150/Zm00001d036046/Zm00001d048318	necrotic4/-/-/elongated mesocotyl1/-/camouflage1/-/lesion22/divinyl reductase1/-/-	11
BP	GO:0072503	cellular divalent inorganic cation homeostasis	11/3483	53/22306	0.195908	0.551499	Zm00001d002022/Zm00001d007229/Zm00001d008911/Zm00001d010324/Zm00001d026479/Zm00001d029129/Zm00001d036563/Zm00001d039379/Zm00001d042939/Zm00001d045944/Zm00001d047769	calcium exchanger2/-/-/-/-/-/-/-/-/-/calcium pump3	11
BP	GO:0000056	ribosomal small subunit export from nucleus	3/3483	10/22306	0.195971	0.551499	Zm00001d021590/Zm00001d026263/Zm00001d034914	-/-/-	3
BP	GO:0000491	small nucleolar ribonucleoprotein complex assembly	3/3483	10/22306	0.195971	0.551499	Zm00001d015120/Zm00001d021931/Zm00001d038622	-/-/-	3
BP	GO:0006047	UDP-N-acetylglucosamine metabolic process	3/3483	10/22306	0.195971	0.551499	Zm00001d003970/Zm00001d026287/Zm00001d051663	-/-/GNAT-transcription factor 19	3
BP	GO:0006048	UDP-N-acetylglucosamine biosynthetic process	3/3483	10/22306	0.195971	0.551499	Zm00001d003970/Zm00001d026287/Zm00001d051663	-/-/GNAT-transcription factor 19	3
BP	GO:0006222	UMP biosynthetic process	3/3483	10/22306	0.195971	0.551499	Zm00001d011855/Zm00001d014912/Zm00001d037208	-/protein disulfide isomerase4/-	3
BP	GO:0006560	proline metabolic process	3/3483	10/22306	0.195971	0.551499	Zm00001d033228/Zm00001d038841/Zm00001d047124	-/putative aldehyde dehydrogenase MIS1/-	3
BP	GO:0006782	protoporphyrinogen IX biosynthetic process	3/3483	10/22306	0.195971	0.551499	Zm00001d002358/Zm00001d027950/Zm00001d029074	necrotic4/-/lesion22	3
BP	GO:0007019	microtubule depolymerization	3/3483	10/22306	0.195971	0.551499	Zm00001d026621/Zm00001d032598/Zm00001d034239	-/-/-	3
BP	GO:0009173	pyrimidine ribonucleoside monophosphate metabolic process	3/3483	10/22306	0.195971	0.551499	Zm00001d011855/Zm00001d014912/Zm00001d037208	-/protein disulfide isomerase4/-	3
BP	GO:0009174	pyrimidine ribonucleoside monophosphate biosynthetic process	3/3483	10/22306	0.195971	0.551499	Zm00001d011855/Zm00001d014912/Zm00001d037208	-/protein disulfide isomerase4/-	3
BP	GO:0016560	protein import into peroxisome matrix, docking	3/3483	10/22306	0.195971	0.551499	Zm00001d034358/Zm00001d039111/Zm00001d052851	-/-/-	3
BP	GO:0030149	sphingolipid catabolic process	3/3483	10/22306	0.195971	0.551499	Zm00001d005431/Zm00001d008389/Zm00001d044175	-/-/-	3
BP	GO:0031062	positive regulation of histone methylation	3/3483	10/22306	0.195971	0.551499	Zm00001d012751/Zm00001d015265/Zm00001d038812	Homeobox-transcription factor 9/Homeobox-transcription factor 28/Homeobox-transcription factor 92	3
BP	GO:0043066	negative regulation of apoptotic process	3/3483	10/22306	0.195971	0.551499	Zm00001d010811/Zm00001d017809/Zm00001d051609	-/-/-	3
BP	GO:0046049	UMP metabolic process	3/3483	10/22306	0.195971	0.551499	Zm00001d011855/Zm00001d014912/Zm00001d037208	-/protein disulfide isomerase4/-	3
BP	GO:0046349	amino sugar biosynthetic process	3/3483	10/22306	0.195971	0.551499	Zm00001d003970/Zm00001d026287/Zm00001d051663	-/-/GNAT-transcription factor 19	3
BP	GO:0046466	membrane lipid catabolic process	3/3483	10/22306	0.195971	0.551499	Zm00001d005431/Zm00001d008389/Zm00001d044175	-/-/-	3
BP	GO:0046501	protoporphyrinogen IX metabolic process	3/3483	10/22306	0.195971	0.551499	Zm00001d002358/Zm00001d027950/Zm00001d029074	necrotic4/-/lesion22	3
BP	GO:0051289	protein homotetramerization	3/3483	10/22306	0.195971	0.551499	Zm00001d002690/Zm00001d027511/Zm00001d027936	plasma membrane intrinsic protein1/catalase2/viviparous5	3
BP	GO:0051415	microtubule nucleation by interphase microtubule organizing center	3/3483	10/22306	0.195971	0.551499	Zm00001d022114/Zm00001d025793/Zm00001d034680	-/-/-	3
BP	GO:0051418	microtubule nucleation by microtubule organizing center	3/3483	10/22306	0.195971	0.551499	Zm00001d022114/Zm00001d025793/Zm00001d034680	-/-/-	3
BP	GO:0061085	regulation of histone H3-K27 methylation	3/3483	10/22306	0.195971	0.551499	Zm00001d012751/Zm00001d015265/Zm00001d038812	Homeobox-transcription factor 9/Homeobox-transcription factor 28/Homeobox-transcription factor 92	3
BP	GO:0061087	positive regulation of histone H3-K27 methylation	3/3483	10/22306	0.195971	0.551499	Zm00001d012751/Zm00001d015265/Zm00001d038812	Homeobox-transcription factor 9/Homeobox-transcription factor 28/Homeobox-transcription factor 92	3
BP	GO:0000055	ribosomal large subunit export from nucleus	4/3483	15/22306	0.196639	0.551499	Zm00001d002190/Zm00001d010500/Zm00001d026263/Zm00001d034914	severe depolymerization of actin1/-/-/-	4
BP	GO:0006071	glycerol metabolic process	4/3483	15/22306	0.196639	0.551499	Zm00001d002085/Zm00001d006221/Zm00001d021310/Zm00001d033795	-/triose phosphate isomerase2/-/-	4
BP	GO:0006598	polyamine catabolic process	4/3483	15/22306	0.196639	0.551499	Zm00001d024281/Zm00001d026334/Zm00001d026586/Zm00001d032815	polyamine oxidase1/-/-/-	4
BP	GO:0006771	riboflavin metabolic process	4/3483	15/22306	0.196639	0.551499	Zm00001d026476/Zm00001d034493/Zm00001d037045/Zm00001d050844	-/-/-/-	4
BP	GO:0009231	riboflavin biosynthetic process	4/3483	15/22306	0.196639	0.551499	Zm00001d026476/Zm00001d034493/Zm00001d037045/Zm00001d050844	-/-/-/-	4
BP	GO:0015866	ADP transport	4/3483	15/22306	0.196639	0.551499	Zm00001d010478/Zm00001d023368/Zm00001d038850/Zm00001d051685	-/-/-/adenine nucleotide translocator2	4
BP	GO:0019400	alditol metabolic process	4/3483	15/22306	0.196639	0.551499	Zm00001d002085/Zm00001d006221/Zm00001d021310/Zm00001d033795	-/triose phosphate isomerase2/-/-	4
BP	GO:0051785	positive regulation of nuclear division	4/3483	15/22306	0.196639	0.551499	Zm00001d007943/Zm00001d018657/Zm00001d035869/Zm00001d045611	-/-/-/-	4
BP	GO:0071051	polyadenylation-dependent snoRNA 3'-end processing	4/3483	15/22306	0.196639	0.551499	Zm00001d009522/Zm00001d021621/Zm00001d022236/Zm00001d027726	RNase PH homolog/-/-/-	4
BP	GO:0072350	tricarboxylic acid metabolic process	19/3483	99/22306	0.196653	0.551499	Zm00001d003083/Zm00001d003923/Zm00001d003947/Zm00001d004564/Zm00001d014030/Zm00001d016166/Zm00001d017258/Zm00001d018758/Zm00001d021000/Zm00001d021770/Zm00001d021908/Zm00001d024952/Zm00001d025258/Zm00001d032187/Zm00001d032695/Zm00001d037006/Zm00001d037294/Zm00001d037731/Zm00001d048358	-/-/-/-/-/phosphoenolpyruvate carboxylase2/-/succinate dehydrogenase1/-/-/-/aconitase2/-/-/malate dehydrogenase4/-/-/-/aconitase3	19
BP	GO:0071826	ribonucleoprotein complex subunit organization	50/3483	284/22306	0.196728	0.551499	Zm00001d000300/Zm00001d001983/Zm00001d002243/Zm00001d002822/Zm00001d003014/Zm00001d005089/Zm00001d005406/Zm00001d007043/Zm00001d011652/Zm00001d013548/Zm00001d013910/Zm00001d014327/Zm00001d014512/Zm00001d015120/Zm00001d015248/Zm00001d015893/Zm00001d015955/Zm00001d016835/Zm00001d017719/Zm00001d019579/Zm00001d021815/Zm00001d021931/Zm00001d022243/Zm00001d022433/Zm00001d025185/Zm00001d025948/Zm00001d0…	eucaryotic translation initiation factor5/-/-/-/-/-/-/-/-/-/-/-/-/-/-/-/-/-/-/-/elongation initiation factor2/-/-/-/-/-/-/-/-/-/-/-/ribosome export associated1/-/-/-/-/eukaryotic initiation factor3/-/60S ribosomal protein L5-1 homolog a/-/-/-/-/-/-/-/-/-/-	50
BP	GO:0002376	immune system process	20/3483	105/22306	0.198683	0.554824	Zm00001d004655/Zm00001d005507/Zm00001d007938/Zm00001d011401/Zm00001d014562/Zm00001d017139/Zm00001d021498/Zm00001d025830/Zm00001d026263/Zm00001d027412/Zm00001d031580/Zm00001d033228/Zm00001d037381/Zm00001d038097/Zm00001d042620/Zm00001d043194/Zm00001d043462/Zm00001d044273/Zm00001d045784/Zm00001d045944	-/-/-/-/-/hydroxymethylbutenyl diphosphate synthase1/-/dicer-like4/-/dicer-like 101/-/-/-/-/-/-/-/-/-/-	20
BP	GO:0030041	actin filament polymerization	9/3483	42/22306	0.199634	0.554824	Zm00001d007806/Zm00001d017106/Zm00001d018004/Zm00001d018484/Zm00001d029343/Zm00001d035183/Zm00001d044802/Zm00001d045323/Zm00001d052273	-/-/Rho-related protein from plants 1/-/-/reaction to X. oryzae1/Rho-related protein from plants 5/double B-box zinc finger protein11/Rho-related protein from plants 8	9
BP	GO:0030833	regulation of actin filament polymerization	9/3483	42/22306	0.199634	0.554824	Zm00001d007806/Zm00001d017106/Zm00001d018004/Zm00001d018484/Zm00001d029343/Zm00001d035183/Zm00001d044802/Zm00001d045323/Zm00001d052273	-/-/Rho-related protein from plants 1/-/-/reaction to X. oryzae1/Rho-related protein from plants 5/double B-box zinc finger protein11/Rho-related protein from plants 8	9
BP	GO:0031167	rRNA methylation	9/3483	42/22306	0.199634	0.554824	Zm00001d005972/Zm00001d009597/Zm00001d017469/Zm00001d017887/Zm00001d028098/Zm00001d037264/Zm00001d039047/Zm00001d051885/Zm00001d053927	-/-/-/-/-/-/-/-/-	9
BP	GO:0042214	terpene metabolic process	9/3483	42/22306	0.199634	0.554824	Zm00001d010607/Zm00001d015053/Zm00001d017766/Zm00001d023690/Zm00001d027936/Zm00001d033222/Zm00001d042076/Zm00001d048373/Zm00001d051556	-/terpene synthase2/nine-cis-epoxycarotenoid dioxygenase8/-/viviparous5/viviparous14/-/white cap1/nine-cis-epoxycarotenoid dioxygenase6	9
BP	GO:0042558	pteridine-containing compound metabolic process	9/3483	42/22306	0.199634	0.554824	Zm00001d005614/Zm00001d007318/Zm00001d009738/Zm00001d023817/Zm00001d024612/Zm00001d042661/Zm00001d048514/Zm00001d049982/Zm00001d053900	-/-/-/-/-/-/brown midrib4/-/-	9
BP	GO:0016119	carotene metabolic process	7/3483	31/22306	0.199962	0.554824	Zm00001d017766/Zm00001d023690/Zm00001d027936/Zm00001d033222/Zm00001d042076/Zm00001d048373/Zm00001d051556	nine-cis-epoxycarotenoid dioxygenase8/-/viviparous5/viviparous14/-/white cap1/nine-cis-epoxycarotenoid dioxygenase6	7
BP	GO:1903320	regulation of protein modification by small protein conjugation or removal	7/3483	31/22306	0.199962	0.554824	Zm00001d016034/Zm00001d022231/Zm00001d023520/Zm00001d030598/Zm00001d032165/Zm00001d037246/Zm00001d041911	cell division cycle202/-/-/-/-/-/-	7
BP	GO:0048827	phyllome development	21/3483	111/22306	0.200436	0.555427	Zm00001d004930/Zm00001d008846/Zm00001d009520/Zm00001d016166/Zm00001d017742/Zm00001d017771/Zm00001d021057/Zm00001d021863/Zm00001d022324/Zm00001d023767/Zm00001d028818/Zm00001d036296/Zm00001d037294/Zm00001d038850/Zm00001d039434/Zm00001d039495/Zm00001d039547/Zm00001d042713/Zm00001d045944/Zm00001d047356/Zm00001d050645	-/-/-/phosphoenolpyruvate carboxylase2/GRF-transcription factor 6/-/Zea mays MADS7/C2C2-YABBY-transcription factor 4/-/-/defective kernel1/enhancer of zeste1/-/-/-/-/Glutamine--tRNA ligase cytoplasmic1/-/-/MADS-transcription factor 76/-	21
BP	GO:0000460	maturation of 5.8S rRNA	12/3483	59/22306	0.201683	0.557459	Zm00001d000432/Zm00001d009597/Zm00001d012886/Zm00001d017982/Zm00001d018022/Zm00001d021621/Zm00001d027726/Zm00001d037449/Zm00001d039047/Zm00001d040768/Zm00001d043155/Zm00001d048253	-/-/-/-/-/-/-/-/-/-/-/-	12
BP	GO:0000470	maturation of LSU-rRNA	12/3483	59/22306	0.201683	0.557459	Zm00001d000432/Zm00001d009597/Zm00001d018022/Zm00001d021061/Zm00001d026254/Zm00001d028384/Zm00001d031640/Zm00001d033616/Zm00001d038646/Zm00001d039047/Zm00001d040768/Zm00001d043155	-/-/-/-/-/-/-/-/-/-/-/-	12
BP	GO:0009116	nucleoside metabolic process	22/3483	117/22306	0.201946	0.557475	Zm00001d001970/Zm00001d005343/Zm00001d005459/Zm00001d011526/Zm00001d011855/Zm00001d014912/Zm00001d015115/Zm00001d017897/Zm00001d017977/Zm00001d019279/Zm00001d023833/Zm00001d026515/Zm00001d027256/Zm00001d029095/Zm00001d031958/Zm00001d034320/Zm00001d037208/Zm00001d041620/Zm00001d042005/Zm00001d047506/Zm00001d051545/Zm00001d053984	-/-/cytidine deaminase2/-/-/protein disulfide isomerase4/-/-/histidine kinase1/cytidine deaminase1/-/viviparous10/-/-/-/-/-/-/-/-/-/-	22
BP	GO:1901615	organic hydroxy compound metabolic process	49/3483	279/22306	0.204589	0.56405	Zm00001d001881/Zm00001d001974/Zm00001d002085/Zm00001d006221/Zm00001d007044/Zm00001d007936/Zm00001d009520/Zm00001d012312/Zm00001d015975/Zm00001d016463/Zm00001d016856/Zm00001d018468/Zm00001d019040/Zm00001d021310/Zm00001d025545/Zm00001d026064/Zm00001d026514/Zm00001d027352/Zm00001d027445/Zm00001d028024/Zm00001d028152/Zm00001d029036/Zm00001d029810/Zm00001d033110/Zm00001d033180/Zm00001d033222/Zm00001d0…	-/-/-/triose phosphate isomerase2/-/-/-/-/-/-/calmodulin binding protein1/formaldehyde dehydrogenase homolog1/-/-/zeaxanthin epoxidase2/-/-/-/-/-/-/-/-/-/brassinosteroid-deficient dwarf1/viviparous14/-/-/-/C2C2-GATA-transcription factor 34/aldehyde oxidase1/-/-/-/-/-/-/-/-/-/-/-/-/-/allene oxide synthase1/-/brown midrib3/small kernel2/hydroperoxide lyase1	49
BP	GO:0042773	ATP synthesis coupled electron transport	13/3483	65/22306	0.206462	0.568492	Zm00001d011750/Zm00001d014772/Zm00001d018758/Zm00001d025286/Zm00001d028773/Zm00001d033753/Zm00001d034244/Zm00001d038658/Zm00001d044459/Zm00001d047720/Zm00001d048102/Zm00001d050696/Zm00001d052436	-/-/succinate dehydrogenase1/iron-sulfur protein1/-/-/-/-/-/-/-/-/-	13
BP	GO:0032940	secretion by cell	27/3483	147/22306	0.206766	0.568607	Zm00001d001765/Zm00001d003913/Zm00001d004159/Zm00001d007760/Zm00001d010824/Zm00001d013049/Zm00001d015890/Zm00001d018060/Zm00001d019091/Zm00001d019104/Zm00001d021828/Zm00001d022502/Zm00001d022584/Zm00001d024205/Zm00001d025398/Zm00001d027808/Zm00001d031942/Zm00001d033303/Zm00001d033317/Zm00001d034505/Zm00001d039196/Zm00001d039612/Zm00001d041138/Zm00001d042331/Zm00001d048857/Zm00001d048902/Zm00001d0…	-/high chlorophyll fluorescence106/-/-/-/-/-/-/-/-/-/-/-/-/-/-/-/roothair defective1/thylakoid assembly4/-/-/FAR1-like-transcription factor 4/-/-/-/-/-	27
BP	GO:0006515	protein quality control for misfolded or incompletely synthesized proteins	10/3483	48/22306	0.207401	0.568909	Zm00001d002856/Zm00001d006214/Zm00001d009339/Zm00001d014124/Zm00001d017330/Zm00001d021301/Zm00001d027707/Zm00001d029121/Zm00001d030149/Zm00001d040322	-/-/-/-/-/LON peptidase1/-/-/-/-	10
BP	GO:0006779	porphyrin-containing compound biosynthetic process	10/3483	48/22306	0.207401	0.568909	Zm00001d002358/Zm00001d002511/Zm00001d008230/Zm00001d014715/Zm00001d015366/Zm00001d027950/Zm00001d029074/Zm00001d029150/Zm00001d036046/Zm00001d048318	necrotic4/-/-/-/camouflage1/-/lesion22/divinyl reductase1/-/-	10
BP	GO:0055082	cellular chemical homeostasis	33/3483	183/22306	0.208668	0.571076	Zm00001d002006/Zm00001d002022/Zm00001d002603/Zm00001d007229/Zm00001d008911/Zm00001d010324/Zm00001d012446/Zm00001d017427/Zm00001d017574/Zm00001d020892/Zm00001d021000/Zm00001d021844/Zm00001d022504/Zm00001d026479/Zm00001d027265/Zm00001d028330/Zm00001d028436/Zm00001d029034/Zm00001d029129/Zm00001d031418/Zm00001d034035/Zm00001d035093/Zm00001d036563/Zm00001d038123/Zm00001d038792/Zm00001d039379/Zm00001d0…	plasma-membrane H+ATPase2/calcium exchanger2/-/-/-/-/-/-/-/-/-/-/-/-/-/-/-/-/-/-/glutathione transporter1/-/-/-/hexokinase2/-/rotten ear2/-/-/-/calcium pump3/-/-	33
BP	GO:0072524	pyridine-containing compound metabolic process	34/3483	189/22306	0.208718	0.571076	Zm00001d003083/Zm00001d005144/Zm00001d005925/Zm00001d006107/Zm00001d006185/Zm00001d006221/Zm00001d007936/Zm00001d011835/Zm00001d014030/Zm00001d017119/Zm00001d020309/Zm00001d020771/Zm00001d021310/Zm00001d021770/Zm00001d027352/Zm00001d028270/Zm00001d028554/Zm00001d030020/Zm00001d030701/Zm00001d032172/Zm00001d032695/Zm00001d037278/Zm00001d038792/Zm00001d040166/Zm00001d040599/Zm00001d041407/Zm00001d0…	-/-/-/pyruvate dehydrogenase3/-/triose phosphate isomerase2/-/-/-/-/-/-/-/-/-/-/-/pyruvate kinase1/-/-/malate dehydrogenase4/phosphofructose kinase1/hexokinase2/-/-/-/-/-/-/-/bZIP-transcription factor 105/-/-/small kernel2	34
BP	GO:0000302	response to reactive oxygen species	19/3483	100/22306	0.209402	0.571134	Zm00001d000228/Zm00001d002611/Zm00001d005812/Zm00001d007234/Zm00001d013984/Zm00001d014445/Zm00001d014446/Zm00001d016926/Zm00001d023833/Zm00001d025106/Zm00001d027511/Zm00001d029170/Zm00001d031494/Zm00001d031908/Zm00001d032659/Zm00001d040322/Zm00001d047841/Zm00001d049297/Zm00001d052101	-/-/-/ascorbate peroxidase2/-/-/-/-/-/-/catalase2/superoxide dismutase4/-/-/-/-/-/-/chaperonin10	19
BP	GO:0006801	superoxide metabolic process	6/3483	26/22306	0.210584	0.571134	Zm00001d002611/Zm00001d005812/Zm00001d025106/Zm00001d029170/Zm00001d031908/Zm00001d052101	-/-/-/superoxide dismutase4/-/chaperonin10	6
BP	GO:0032434	regulation of proteasomal ubiquitin-dependent protein catabolic process	6/3483	26/22306	0.210584	0.571134	Zm00001d003207/Zm00001d025750/Zm00001d028285/Zm00001d031178/Zm00001d035574/Zm00001d050090	-/-/-/-/-/-	6
BP	GO:0043487	regulation of RNA stability	6/3483	26/22306	0.210584	0.571134	Zm00001d005502/Zm00001d019920/Zm00001d025673/Zm00001d030398/Zm00001d032875/Zm00001d052888	-/-/-/-/-/-	6
BP	GO:0046164	alcohol catabolic process	6/3483	26/22306	0.210584	0.571134	Zm00001d002085/Zm00001d006221/Zm00001d021310/Zm00001d026064/Zm00001d033110/Zm00001d033795	-/triose phosphate isomerase2/-/-/-/-	6
BP	GO:0090627	plant epidermal cell differentiation	6/3483	26/22306	0.210584	0.571134	Zm00001d002144/Zm00001d007158/Zm00001d008743/Zm00001d028818/Zm00001d040724/Zm00001d053930	-/-/-/defective kernel1/-/-	6
BP	GO:2000058	regulation of ubiquitin-dependent protein catabolic process	6/3483	26/22306	0.210584	0.571134	Zm00001d003207/Zm00001d025750/Zm00001d028285/Zm00001d031178/Zm00001d035574/Zm00001d050090	-/-/-/-/-/-	6
BP	GO:0009826	unidimensional cell growth	8/3483	37/22306	0.211267	0.571555	Zm00001d012212/Zm00001d019881/Zm00001d021641/Zm00001d023908/Zm00001d032099/Zm00001d033597/Zm00001d035030/Zm00001d046973	gibberellin 20-oxidase5/-/-/-/-/-/-/-	8
BP	GO:0019320	hexose catabolic process	8/3483	37/22306	0.211267	0.571555	Zm00001d002377/Zm00001d013428/Zm00001d018902/Zm00001d026311/Zm00001d032346/Zm00001d033746/Zm00001d034733/Zm00001d035212	-/phosphoglucomutase2/-/-/-/phosphoglucomutase1/-/-	8
BP	GO:0019693	ribose phosphate metabolic process	68/3483	396/22306	0.212643	0.57456	Zm00001d001970/Zm00001d002003/Zm00001d005925/Zm00001d006107/Zm00001d006185/Zm00001d006221/Zm00001d011750/Zm00001d011855/Zm00001d013389/Zm00001d014772/Zm00001d014778/Zm00001d014912/Zm00001d015115/Zm00001d015427/Zm00001d017119/Zm00001d018758/Zm00001d020204/Zm00001d020309/Zm00001d020771/Zm00001d021297/Zm00001d021310/Zm00001d021554/Zm00001d023833/Zm00001d024034/Zm00001d025286/Zm00001d026515/Zm00001d0…	-/-/-/pyruvate dehydrogenase3/-/triose phosphate isomerase2/-/-/-/-/-/protein disulfide isomerase4/-/-/-/succinate dehydrogenase1/-/-/-/-/-/-/-/-/iron-sulfur protein1/viviparous10/-/adenylosuccinate synthetase/-/-/-/-/-/pyruvate kinase1/-/-/-/-/-/-/-/-/phosphofructose kinase1/-/-/-/hexokinase2/-/-/-/-/-/-/-/-/-/bZIP-transcription factor 105/-/-/-/-/-/-/-/-/-/vacuolar proton pump3/-	68
BP	GO:0000154	rRNA modification	11/3483	54/22306	0.21363	0.576508	Zm00001d005972/Zm00001d009597/Zm00001d016595/Zm00001d017242/Zm00001d017469/Zm00001d017887/Zm00001d028098/Zm00001d037264/Zm00001d039047/Zm00001d051885/Zm00001d053927	-/-/-/-/-/-/-/-/-/-/-	11
BP	GO:0000165	MAPK cascade	9/3483	43/22306	0.219911	0.587359	Zm00001d010302/Zm00001d011426/Zm00001d015269/Zm00001d024807/Zm00001d034055/Zm00001d039037/Zm00001d039141/Zm00001d047349/Zm00001d053997	-/-/MAP kinase14/MAP kinase6/-/-/-/salt-induced MAP kinase1/GRMZM2G374088	9
BP	GO:0006415	translational termination	9/3483	43/22306	0.219911	0.587359	Zm00001d007940/Zm00001d018330/Zm00001d022042/Zm00001d025100/Zm00001d034575/Zm00001d035051/Zm00001d047534/Zm00001d048717/Zm00001d049694	-/-/eukaryotic translation initiation factor 5A/-/-/-/-/-/-	9
BP	GO:0032968	positive regulation of transcription elongation from RNA polymerase II promoter	9/3483	43/22306	0.219911	0.587359	Zm00001d006759/Zm00001d009791/Zm00001d013371/Zm00001d014337/Zm00001d016846/Zm00001d018664/Zm00001d035050/Zm00001d038570/Zm00001d044753	-/-/-/-/-/-/-/-/-	9
BP	GO:0034243	regulation of transcription elongation from RNA polymerase II promoter	9/3483	43/22306	0.219911	0.587359	Zm00001d006759/Zm00001d009791/Zm00001d013371/Zm00001d014337/Zm00001d016846/Zm00001d018664/Zm00001d035050/Zm00001d038570/Zm00001d044753	-/-/-/-/-/-/-/-/-	9
BP	GO:0022406	membrane docking	18/3483	95/22306	0.220877	0.587359	Zm00001d002148/Zm00001d004159/Zm00001d007760/Zm00001d013049/Zm00001d015890/Zm00001d019104/Zm00001d021828/Zm00001d022502/Zm00001d024205/Zm00001d025398/Zm00001d025939/Zm00001d039196/Zm00001d041138/Zm00001d041693/Zm00001d042018/Zm00001d048147/Zm00001d049522/Zm00001d049553	-/-/-/-/-/-/-/-/-/-/-/-/-/-/-/-/-/-	18
BP	GO:0140056	organelle localization by membrane tethering	18/3483	95/22306	0.220877	0.587359	Zm00001d002148/Zm00001d004159/Zm00001d007760/Zm00001d013049/Zm00001d015890/Zm00001d019104/Zm00001d021828/Zm00001d022502/Zm00001d024205/Zm00001d025398/Zm00001d025939/Zm00001d039196/Zm00001d041138/Zm00001d041693/Zm00001d042018/Zm00001d048147/Zm00001d049522/Zm00001d049553	-/-/-/-/-/-/-/-/-/-/-/-/-/-/-/-/-/-	18
BP	GO:0002790	peptide secretion	5/3483	21/22306	0.221445	0.587359	Zm00001d003913/Zm00001d010824/Zm00001d033317/Zm00001d039612/Zm00001d048857	high chlorophyll fluorescence106/-/thylakoid assembly4/FAR1-like-transcription factor 4/-	5
BP	GO:0006305	DNA alkylation	5/3483	21/22306	0.221445	0.587359	Zm00001d018977/Zm00001d031291/Zm00001d044917/Zm00001d048516/Zm00001d052353	DNA methyl transferase1/-/-/DNA methyl transferase3/-	5
BP	GO:0006306	DNA methylation	5/3483	21/22306	0.221445	0.587359	Zm00001d018977/Zm00001d031291/Zm00001d044917/Zm00001d048516/Zm00001d052353	DNA methyl transferase1/-/-/DNA methyl transferase3/-	5
BP	GO:0006743	ubiquinone metabolic process	5/3483	21/22306	0.221445	0.587359	Zm00001d000123/Zm00001d012510/Zm00001d027999/Zm00001d045322/Zm00001d047869	-/-/-/-/-	5
BP	GO:0006744	ubiquinone biosynthetic process	5/3483	21/22306	0.221445	0.587359	Zm00001d000123/Zm00001d012510/Zm00001d027999/Zm00001d045322/Zm00001d047869	-/-/-/-/-	5
BP	GO:0009306	protein secretion	5/3483	21/22306	0.221445	0.587359	Zm00001d003913/Zm00001d010824/Zm00001d033317/Zm00001d039612/Zm00001d048857	high chlorophyll fluorescence106/-/thylakoid assembly4/FAR1-like-transcription factor 4/-	5
BP	GO:0031365	N-terminal protein amino acid modification	5/3483	21/22306	0.221445	0.587359	Zm00001d011445/Zm00001d018218/Zm00001d026391/Zm00001d038006/Zm00001d052009	-/GNAT-transcription factor 26/GNAT-transcription factor 43/-/-	5
BP	GO:0071417	cellular response to organonitrogen compound	5/3483	21/22306	0.221445	0.587359	Zm00001d005064/Zm00001d023230/Zm00001d030020/Zm00001d042661/Zm00001d052327	-/-/pyruvate kinase1/-/-	5
BP	GO:0032880	regulation of protein localization	7/3483	32/22306	0.223871	0.590181	Zm00001d007943/Zm00001d014913/Zm00001d018657/Zm00001d032575/Zm00001d034914/Zm00001d035889/Zm00001d054076	-/-/-/-/-/-/-	7
BP	GO:0048509	regulation of meristem development	7/3483	32/22306	0.223871	0.590181	Zm00001d005281/Zm00001d014297/Zm00001d028818/Zm00001d030149/Zm00001d045944/Zm00001d046485/Zm00001d049190	-/histidine kinase3/defective kernel1/-/-/-/minichromosome maintenance7	7
BP	GO:1901800	positive regulation of proteasomal protein catabolic process	7/3483	32/22306	0.223871	0.590181	Zm00001d003207/Zm00001d015886/Zm00001d025750/Zm00001d028285/Zm00001d031178/Zm00001d050090/Zm00001d050616	-/-/-/-/-/-/-	7
BP	GO:1903052	positive regulation of proteolysis involved in cellular protein catabolic process	7/3483	32/22306	0.223871	0.590181	Zm00001d003207/Zm00001d015886/Zm00001d025750/Zm00001d028285/Zm00001d031178/Zm00001d050090/Zm00001d050616	-/-/-/-/-/-/-	7
BP	GO:1903364	positive regulation of cellular protein catabolic process	7/3483	32/22306	0.223871	0.590181	Zm00001d003207/Zm00001d015886/Zm00001d025750/Zm00001d028285/Zm00001d031178/Zm00001d050090/Zm00001d050616	-/-/-/-/-/-/-	7
BP	GO:0052546	cell wall pectin metabolic process	10/3483	49/22306	0.226654	0.59679	Zm00001d002625/Zm00001d002631/Zm00001d010599/Zm00001d012211/Zm00001d012399/Zm00001d014036/Zm00001d017583/Zm00001d029336/Zm00001d032703/Zm00001d038076	-/-/-/-/-/-/-/-/-/-	10
BP	GO:0016072	rRNA metabolic process	62/3483	362/22306	0.231497	0.597171	Zm00001d000432/Zm00001d001983/Zm00001d002735/Zm00001d005023/Zm00001d005089/Zm00001d005972/Zm00001d006361/Zm00001d006497/Zm00001d009522/Zm00001d009597/Zm00001d012195/Zm00001d012886/Zm00001d013626/Zm00001d014626/Zm00001d016286/Zm00001d016595/Zm00001d017242/Zm00001d017469/Zm00001d017887/Zm00001d017967/Zm00001d017982/Zm00001d018022/Zm00001d019449/Zm00001d021061/Zm00001d021621/Zm00001d022236/Zm00001d0…	-/-/-/-/-/-/-/-/RNase PH homolog/-/-/-/-/-/-/-/-/-/-/-/-/-/-/-/-/-/-/-/dicer-like 101/-/-/-/-/-/-/-/-/-/-/-/-/-/-/-/ribosome export associated1/-/-/-/-/-/-/-/-/-/-/-/-/-/-/-/-/-	62
BP	GO:0006152	purine nucleoside catabolic process	4/3483	16/22306	0.231909	0.597171	Zm00001d005343/Zm00001d005459/Zm00001d019279/Zm00001d031958	-/cytidine deaminase2/cytidine deaminase1/-	4
BP	GO:0009240	isopentenyl diphosphate biosynthetic process	4/3483	16/22306	0.231909	0.597171	Zm00001d010274/Zm00001d017139/Zm00001d033945/Zm00001d047906	isopentenyl pyrophosphate isomerase2/hydroxymethylbutenyl diphosphate synthase1/C2C2-GATA-transcription factor 34/-	4
BP	GO:0031060	regulation of histone methylation	4/3483	16/22306	0.231909	0.597171	Zm00001d012751/Zm00001d015265/Zm00001d038812/Zm00001d052353	Homeobox-transcription factor 9/Homeobox-transcription factor 28/Homeobox-transcription factor 92/-	4
BP	GO:0034085	establishment of sister chromatid cohesion	4/3483	16/22306	0.231909	0.597171	Zm00001d007943/Zm00001d014913/Zm00001d018657/Zm00001d032575	-/-/-/-	4
BP	GO:0034502	protein localization to chromosome	4/3483	16/22306	0.231909	0.597171	Zm00001d007943/Zm00001d014913/Zm00001d018657/Zm00001d032575	-/-/-/-	4
BP	GO:0035999	tetrahydrofolate interconversion	4/3483	16/22306	0.231909	0.597171	Zm00001d005614/Zm00001d009738/Zm00001d042661/Zm00001d053900	-/-/-/-	4
BP	GO:0046490	isopentenyl diphosphate metabolic process	4/3483	16/22306	0.231909	0.597171	Zm00001d010274/Zm00001d017139/Zm00001d033945/Zm00001d047906	isopentenyl pyrophosphate isomerase2/hydroxymethylbutenyl diphosphate synthase1/C2C2-GATA-transcription factor 34/-	4
BP	GO:0006650	glycerophospholipid metabolic process	40/3483	228/22306	0.234216	0.597171	Zm00001d007638/Zm00001d008310/Zm00001d012034/Zm00001d012118/Zm00001d012701/Zm00001d013090/Zm00001d016822/Zm00001d016990/Zm00001d017654/Zm00001d018013/Zm00001d027485/Zm00001d028261/Zm00001d028366/Zm00001d028698/Zm00001d029211/Zm00001d029333/Zm00001d032238/Zm00001d033110/Zm00001d033645/Zm00001d035030/Zm00001d036055/Zm00001d036631/Zm00001d037332/Zm00001d037946/Zm00001d038830/Zm00001d038891/Zm00001d0…	phospholipid synthesis1/-/-/-/-/-/-/-/-/-/-/-/-/-/-/-/-/-/-/-/-/-/-/phospholipase D13/-/-/phospholipase D1/-/-/-/-/-/-/-/-/-/-/GRMZM2G153722/-/-	40
BP	GO:0007166	cell surface receptor signaling pathway	50/3483	289/22306	0.23504	0.597171	Zm00001d002026/Zm00001d002039/Zm00001d002905/Zm00001d003072/Zm00001d003212/Zm00001d005450/Zm00001d006627/Zm00001d010421/Zm00001d010971/Zm00001d011450/Zm00001d011700/Zm00001d012625/Zm00001d013747/Zm00001d016928/Zm00001d018059/Zm00001d018472/Zm00001d019515/Zm00001d020068/Zm00001d021136/Zm00001d021829/Zm00001d024430/Zm00001d025920/Zm00001d032868/Zm00001d035476/Zm00001d036300/Zm00001d037110/Zm00001d0…	-/-/-/-/-/-/-/-/-/-/-/-/-/somatic embryogenesis receptor-like kinase2/-/-/-/-/-/-/-/-/-/-/-/-/-/-/-/-/-/-/-/-/-/-/-/-/-/-/-/-/-/-/-/-/-/somatic embryogenesis receptor-like kinase3/-/-	50
BP	GO:0006323	DNA packaging	19/3483	102/22306	0.236002	0.597171	Zm00001d006499/Zm00001d007943/Zm00001d011252/Zm00001d012423/Zm00001d012439/Zm00001d013439/Zm00001d013440/Zm00001d014913/Zm00001d018657/Zm00001d019789/Zm00001d021635/Zm00001d023839/Zm00001d026153/Zm00001d032575/Zm00001d033533/Zm00001d039821/Zm00001d042954/Zm00001d044330/Zm00001d044581	-/-/MYB-related-transcription factor 101/-/H4C7/-/-/-/-/-/-/-/-/-/-/-/H4C7/MYB-related-transcription factor 6/-	19
BP	GO:0006004	fucose metabolic process	12/3483	61/22306	0.236245	0.597171	Zm00001d006931/Zm00001d020835/Zm00001d029008/Zm00001d031669/Zm00001d032819/Zm00001d037265/Zm00001d039127/Zm00001d041823/Zm00001d045763/Zm00001d048323/Zm00001d049210/Zm00001d050483	-/-/-/-/-/-/-/-/-/-/-/-	12
BP	GO:0000054	ribosomal subunit export from nucleus	6/3483	27/22306	0.237562	0.597171	Zm00001d002190/Zm00001d010500/Zm00001d021590/Zm00001d026263/Zm00001d034914/Zm00001d047534	severe depolymerization of actin1/-/-/-/-/-	6
BP	GO:0006553	lysine metabolic process	6/3483	27/22306	0.237562	0.597171	Zm00001d013223/Zm00001d023429/Zm00001d027319/Zm00001d037282/Zm00001d047935/Zm00001d050134	-/-/-/-/-/aspartate kinase-homoserine dehydrogenase1	6
BP	GO:0009085	lysine biosynthetic process	6/3483	27/22306	0.237562	0.597171	Zm00001d013223/Zm00001d023429/Zm00001d027319/Zm00001d037282/Zm00001d047935/Zm00001d050134	-/-/-/-/-/aspartate kinase-homoserine dehydrogenase1	6
BP	GO:0033750	ribosome localization	6/3483	27/22306	0.237562	0.597171	Zm00001d002190/Zm00001d010500/Zm00001d021590/Zm00001d026263/Zm00001d034914/Zm00001d047534	severe depolymerization of actin1/-/-/-/-/-	6
BP	GO:0035670	plant-type ovary development	6/3483	27/22306	0.237562	0.597171	Zm00001d008846/Zm00001d021057/Zm00001d021863/Zm00001d039434/Zm00001d039547/Zm00001d047356	-/Zea mays MADS7/C2C2-YABBY-transcription factor 4/-/Glutamine--tRNA ligase cytoplasmic1/MADS-transcription factor 76	6
BP	GO:0048481	plant ovule development	6/3483	27/22306	0.237562	0.597171	Zm00001d008846/Zm00001d021057/Zm00001d021863/Zm00001d039434/Zm00001d039547/Zm00001d047356	-/Zea mays MADS7/C2C2-YABBY-transcription factor 4/-/Glutamine--tRNA ligase cytoplasmic1/MADS-transcription factor 76	6
BP	GO:0042273	ribosomal large subunit biogenesis	31/3483	174/22306	0.23872	0.597171	Zm00001d000432/Zm00001d002190/Zm00001d005089/Zm00001d006361/Zm00001d009597/Zm00001d011873/Zm00001d014497/Zm00001d017719/Zm00001d018022/Zm00001d021061/Zm00001d021580/Zm00001d026254/Zm00001d027421/Zm00001d028140/Zm00001d028384/Zm00001d031640/Zm00001d033616/Zm00001d037917/Zm00001d038475/Zm00001d038646/Zm00001d039047/Zm00001d039211/Zm00001d039908/Zm00001d040768/Zm00001d041945/Zm00001d042093/Zm00001d0…	-/severe depolymerization of actin1/-/-/-/-/-/-/-/-/-/-/-/-/-/-/-/-/ribosome export associated1/-/-/-/-/-/-/-/60S ribosomal protein L5-1 homolog a/-/-/-/-	31
BP	GO:0006400	tRNA modification	23/3483	126/22306	0.238899	0.597171	Zm00001d003621/Zm00001d004196/Zm00001d012794/Zm00001d013673/Zm00001d015086/Zm00001d017897/Zm00001d018070/Zm00001d018148/Zm00001d020541/Zm00001d021624/Zm00001d022045/Zm00001d024463/Zm00001d025919/Zm00001d028098/Zm00001d028596/Zm00001d028597/Zm00001d029077/Zm00001d036657/Zm00001d037290/Zm00001d040583/Zm00001d043815/Zm00001d051608/Zm00001d053963	-/-/-/-/-/-/-/-/-/-/-/-/-/-/-/-/-/-/-/-/-/-/-	23
BP	GO:0006873	cellular ion homeostasis	30/3483	168/22306	0.239013	0.597171	Zm00001d002006/Zm00001d002022/Zm00001d002603/Zm00001d007229/Zm00001d008911/Zm00001d010324/Zm00001d012446/Zm00001d017427/Zm00001d020892/Zm00001d021000/Zm00001d021844/Zm00001d022504/Zm00001d026479/Zm00001d027265/Zm00001d028330/Zm00001d028436/Zm00001d029034/Zm00001d029129/Zm00001d031418/Zm00001d034035/Zm00001d035093/Zm00001d036563/Zm00001d038123/Zm00001d039379/Zm00001d041590/Zm00001d042939/Zm00001d0…	plasma-membrane H+ATPase2/calcium exchanger2/-/-/-/-/-/-/-/-/-/-/-/-/-/-/-/-/-/glutathione transporter1/-/-/-/-/rotten ear2/-/-/calcium pump3/-/-	30
BP	GO:0046903	secretion	28/3483	156/22306	0.239411	0.597171	Zm00001d001765/Zm00001d003913/Zm00001d004159/Zm00001d007760/Zm00001d010824/Zm00001d013049/Zm00001d015890/Zm00001d018060/Zm00001d019091/Zm00001d019104/Zm00001d021828/Zm00001d022502/Zm00001d022584/Zm00001d024205/Zm00001d025398/Zm00001d027808/Zm00001d028505/Zm00001d031942/Zm00001d033303/Zm00001d033317/Zm00001d034505/Zm00001d039196/Zm00001d039612/Zm00001d041138/Zm00001d042331/Zm00001d048857/Zm00001d0…	-/high chlorophyll fluorescence106/-/-/-/-/-/-/-/-/-/-/-/-/-/-/-/-/roothair defective1/thylakoid assembly4/-/-/FAR1-like-transcription factor 4/-/-/-/-/-	28
BP	GO:0042278	purine nucleoside metabolic process	13/3483	67/22306	0.239667	0.597171	Zm00001d001970/Zm00001d005343/Zm00001d005459/Zm00001d017897/Zm00001d019279/Zm00001d023833/Zm00001d026515/Zm00001d029095/Zm00001d031958/Zm00001d034320/Zm00001d047506/Zm00001d051545/Zm00001d053984	-/-/cytidine deaminase2/-/cytidine deaminase1/-/viviparous10/-/-/-/-/-/-	13
BP	GO:0000301	retrograde transport, vesicle recycling within Golgi	3/3483	11/22306	0.240026	0.597171	Zm00001d009816/Zm00001d012760/Zm00001d043502	-/-/-	3
BP	GO:0006777	Mo-molybdopterin cofactor biosynthetic process	3/3483	11/22306	0.240026	0.597171	Zm00001d001970/Zm00001d026515/Zm00001d051608	-/viviparous10/-	3
BP	GO:0007035	vacuolar acidification	3/3483	11/22306	0.240026	0.597171	Zm00001d012446/Zm00001d028436/Zm00001d047910	-/-/-	3
BP	GO:0009583	detection of light stimulus	3/3483	11/22306	0.240026	0.597171	Zm00001d013262/Zm00001d023833/Zm00001d028905	topoisomerase-like enzyme1/-/phytochromeB1	3
BP	GO:0009955	adaxial/abaxial pattern specification	3/3483	11/22306	0.240026	0.597171	Zm00001d021863/Zm00001d025830/Zm00001d028818	C2C2-YABBY-transcription factor 4/dicer-like4/defective kernel1	3
BP	GO:0010150	leaf senescence	3/3483	11/22306	0.240026	0.597171	Zm00001d017771/Zm00001d036296/Zm00001d039495	-/enhancer of zeste1/-	3
BP	GO:0010215	cellulose microfibril organization	3/3483	11/22306	0.240026	0.597171	Zm00001d007208/Zm00001d019670/Zm00001d034049	-/-/-	3
BP	GO:0018126	protein hydroxylation	3/3483	11/22306	0.240026	0.597171	Zm00001d027385/Zm00001d032573/Zm00001d038531	-/-/-	3
BP	GO:0018401	peptidyl-proline hydroxylation to 4-hydroxy-L-proline	3/3483	11/22306	0.240026	0.597171	Zm00001d027385/Zm00001d032573/Zm00001d038531	-/-/-	3
BP	GO:0019471	4-hydroxyproline metabolic process	3/3483	11/22306	0.240026	0.597171	Zm00001d027385/Zm00001d032573/Zm00001d038531	-/-/-	3
BP	GO:0019511	peptidyl-proline hydroxylation	3/3483	11/22306	0.240026	0.597171	Zm00001d027385/Zm00001d032573/Zm00001d038531	-/-/-	3
BP	GO:0019720	Mo-molybdopterin cofactor metabolic process	3/3483	11/22306	0.240026	0.597171	Zm00001d001970/Zm00001d026515/Zm00001d051608	-/viviparous10/-	3
BP	GO:0019740	nitrogen utilization	3/3483	11/22306	0.240026	0.597171	Zm00001d022388/Zm00001d038948/Zm00001d043845	ferredoxin-dependent glutamate synthase1/-/-	3
BP	GO:0042981	regulation of apoptotic process	3/3483	11/22306	0.240026	0.597171	Zm00001d010811/Zm00001d017809/Zm00001d051609	-/-/-	3
BP	GO:0043545	molybdopterin cofactor metabolic process	3/3483	11/22306	0.240026	0.597171	Zm00001d001970/Zm00001d026515/Zm00001d051608	-/viviparous10/-	3
BP	GO:0045851	pH reduction	3/3483	11/22306	0.240026	0.597171	Zm00001d012446/Zm00001d028436/Zm00001d047910	-/-/-	3
BP	GO:0048017	inositol lipid-mediated signaling	3/3483	11/22306	0.240026	0.597171	Zm00001d007229/Zm00001d037946/Zm00001d049076	-/phospholipase D13/-	3
BP	GO:0051189	prosthetic group metabolic process	3/3483	11/22306	0.240026	0.597171	Zm00001d001970/Zm00001d026515/Zm00001d051608	-/viviparous10/-	3
BP	GO:0051262	protein tetramerization	3/3483	11/22306	0.240026	0.597171	Zm00001d002690/Zm00001d027511/Zm00001d027936	plasma membrane intrinsic protein1/catalase2/viviparous5	3
BP	GO:0051452	intracellular pH reduction	3/3483	11/22306	0.240026	0.597171	Zm00001d012446/Zm00001d028436/Zm00001d047910	-/-/-	3
BP	GO:0061727	methylglyoxal catabolic process to lactate	3/3483	11/22306	0.240026	0.597171	Zm00001d001881/Zm00001d015975/Zm00001d029036	-/-/-	3
BP	GO:0070726	cell wall assembly	3/3483	11/22306	0.240026	0.597171	Zm00001d007208/Zm00001d019670/Zm00001d034049	-/-/-	3
BP	GO:0071668	plant-type cell wall assembly	3/3483	11/22306	0.240026	0.597171	Zm00001d007208/Zm00001d019670/Zm00001d034049	-/-/-	3
BP	GO:0090693	plant organ senescence	3/3483	11/22306	0.240026	0.597171	Zm00001d017771/Zm00001d036296/Zm00001d039495	-/enhancer of zeste1/-	3
BP	GO:2000762	regulation of phenylpropanoid metabolic process	3/3483	11/22306	0.240026	0.597171	Zm00001d004580/Zm00001d005241/Zm00001d022429	-/-/-	3
BP	GO:0006289	nucleotide-excision repair	14/3483	73/22306	0.242424	0.601757	Zm00001d007640/Zm00001d016581/Zm00001d020978/Zm00001d022141/Zm00001d024819/Zm00001d024953/Zm00001d036531/Zm00001d037326/Zm00001d039446/Zm00001d040203/Zm00001d042794/Zm00001d045665/Zm00001d049563/Zm00001d053917	-/-/-/-/-/-/-/-/-/-/-/-/BSD-transcription factor 3/-	14
BP	GO:0033013	tetrapyrrole metabolic process	14/3483	73/22306	0.242424	0.601757	Zm00001d002358/Zm00001d002511/Zm00001d008230/Zm00001d011876/Zm00001d013651/Zm00001d014297/Zm00001d014715/Zm00001d015366/Zm00001d027950/Zm00001d029074/Zm00001d029150/Zm00001d036046/Zm00001d047527/Zm00001d048318	necrotic4/-/-/elongated mesocotyl1/-/histidine kinase3/-/camouflage1/-/lesion22/divinyl reductase1/-/-/-	14
BP	GO:0090305	nucleic acid phosphodiester bond hydrolysis	64/3483	376/22306	0.243665	0.604144	Zm00001d001983/Zm00001d002154/Zm00001d004152/Zm00001d005812/Zm00001d006168/Zm00001d006350/Zm00001d008294/Zm00001d009522/Zm00001d009879/Zm00001d011188/Zm00001d012571/Zm00001d012824/Zm00001d012886/Zm00001d013262/Zm00001d013887/Zm00001d014187/Zm00001d014191/Zm00001d014324/Zm00001d015999/Zm00001d016581/Zm00001d017751/Zm00001d017883/Zm00001d018891/Zm00001d019314/Zm00001d021347/Zm00001d021621/Zm00001d0…	-/meiotic recombination protein 11 homolog A/-/-/-/-/-/RNase PH homolog/-/-/-/-/-/topoisomerase-like enzyme1/-/-/UTP-glucose-P-uridyltransferase homolog/-/-/-/organelle transcript processing51/-/chloroplast RNA processing4/-/-/-/-/-/-/-/-/DNA polymerase like1/-/dicer-like4/white seedling2/dicer-like 101/-/-/-/-/-/-/-/-/-/-/-/-/-/-/-/-/-/-/-/-/-/-/cold regulated protein homolog1/-/-/-/-/-	64
BP	GO:0000281	mitotic cytokinesis	15/3483	79/22306	0.244645	0.604498	Zm00001d002056/Zm00001d005250/Zm00001d005269/Zm00001d021731/Zm00001d023760/Zm00001d023908/Zm00001d027412/Zm00001d030121/Zm00001d034082/Zm00001d034770/Zm00001d042262/Zm00001d044273/Zm00001d045354/Zm00001d049510/Zm00001d053930	-/cellulose synthase9/-/-/chitin synthase homolog1/-/dicer-like 101/roothairless6/-/cellulose synthase6/-/-/-/-/-	15
BP	GO:0006906	vesicle fusion	15/3483	79/22306	0.244645	0.604498	Zm00001d002148/Zm00001d005170/Zm00001d006916/Zm00001d006939/Zm00001d019091/Zm00001d020485/Zm00001d022199/Zm00001d024205/Zm00001d027808/Zm00001d031942/Zm00001d033488/Zm00001d034505/Zm00001d041693/Zm00001d042018/Zm00001d048147	-/-/-/-/-/-/-/-/-/-/-/-/-/-/-	15
BP	GO:0090503	RNA phosphodiester bond hydrolysis, exonucleolytic	15/3483	79/22306	0.244645	0.604498	Zm00001d004152/Zm00001d014187/Zm00001d014324/Zm00001d018891/Zm00001d021621/Zm00001d027487/Zm00001d027726/Zm00001d027811/Zm00001d037449/Zm00001d038091/Zm00001d040470/Zm00001d042908/Zm00001d044447/Zm00001d049449/Zm00001d052218	-/-/-/chloroplast RNA processing4/-/-/-/-/-/-/-/-/-/cold regulated protein homolog1/-	15
BP	GO:2001251	negative regulation of chromosome organization	10/3483	50/22306	0.246558	0.608531	Zm00001d007585/Zm00001d013440/Zm00001d021145/Zm00001d023279/Zm00001d042639/Zm00001d044358/Zm00001d044630/Zm00001d047427/Zm00001d049190/Zm00001d052353	-/-/-/-/-/-/-/-/minichromosome maintenance7/-	10
BP	GO:0016075	rRNA catabolic process	7/3483	33/22306	0.248705	0.611667	Zm00001d001983/Zm00001d009522/Zm00001d021621/Zm00001d022236/Zm00001d027412/Zm00001d027487/Zm00001d027726	-/RNase PH homolog/-/-/dicer-like 101/-/-	7
BP	GO:0071428	rRNA-containing ribonucleoprotein complex export from nucleus	7/3483	33/22306	0.248705	0.611667	Zm00001d002190/Zm00001d010500/Zm00001d021590/Zm00001d026263/Zm00001d034914/Zm00001d047534/Zm00001d048253	severe depolymerization of actin1/-/-/-/-/-/-	7
BP	GO:0009414	response to water deprivation	18/3483	97/22306	0.248957	0.611667	Zm00001d002690/Zm00001d009700/Zm00001d012052/Zm00001d012439/Zm00001d014297/Zm00001d015477/Zm00001d017547/Zm00001d027511/Zm00001d028152/Zm00001d028593/Zm00001d029207/Zm00001d033228/Zm00001d034161/Zm00001d039856/Zm00001d042842/Zm00001d042954/Zm00001d045897/Zm00001d045944	plasma membrane intrinsic protein1/-/-/H4C7/histidine kinase3/-/-/catalase2/-/-/-/-/SnRK2 serine threonine protein kinase8/-/starch phoshorylase2/H4C7/-/-	18
BP	GO:0009415	response to water	18/3483	97/22306	0.248957	0.611667	Zm00001d002690/Zm00001d009700/Zm00001d012052/Zm00001d012439/Zm00001d014297/Zm00001d015477/Zm00001d017547/Zm00001d027511/Zm00001d028152/Zm00001d028593/Zm00001d029207/Zm00001d033228/Zm00001d034161/Zm00001d039856/Zm00001d042842/Zm00001d042954/Zm00001d045897/Zm00001d045944	plasma membrane intrinsic protein1/-/-/H4C7/histidine kinase3/-/-/catalase2/-/-/-/-/SnRK2 serine threonine protein kinase8/-/starch phoshorylase2/H4C7/-/-	18
BP	GO:0051783	regulation of nuclear division	19/3483	103/22306	0.249814	0.613078	Zm00001d002662/Zm00001d007585/Zm00001d007943/Zm00001d010656/Zm00001d012560/Zm00001d018657/Zm00001d023279/Zm00001d024953/Zm00001d033365/Zm00001d035869/Zm00001d037979/Zm00001d037981/Zm00001d040381/Zm00001d042639/Zm00001d044630/Zm00001d045611/Zm00001d048127/Zm00001d052185/Zm00001d053930	cyclin8/-/-/cyclin1/cyclin7/-/-/-/-/-/-/-/-/-/-/-/-/-/-	19
BP	GO:0015698	inorganic anion transport	20/3483	109/22306	0.250454	0.613952	Zm00001d002603/Zm00001d005257/Zm00001d014327/Zm00001d014976/Zm00001d016855/Zm00001d016982/Zm00001d017868/Zm00001d018557/Zm00001d027667/Zm00001d031318/Zm00001d033053/Zm00001d033597/Zm00001d037970/Zm00001d038840/Zm00001d041590/Zm00001d043721/Zm00001d048149/Zm00001d048362/Zm00001d048507/Zm00001d051103	-/-/-/-/-/-/-/-/-/-/-/-/-/voltage-dependent anion channel protein2/rotten ear2/-/-/-/-/-	20
BP	GO:0072507	divalent inorganic cation homeostasis	11/3483	56/22306	0.250921	0.614402	Zm00001d002022/Zm00001d007229/Zm00001d008911/Zm00001d010324/Zm00001d026479/Zm00001d029129/Zm00001d036563/Zm00001d039379/Zm00001d042939/Zm00001d045944/Zm00001d047769	calcium exchanger2/-/-/-/-/-/-/-/-/-/calcium pump3	11
BP	GO:0009089	lysine biosynthetic process via diaminopimelate	5/3483	22/22306	0.252447	0.615356	Zm00001d013223/Zm00001d023429/Zm00001d037282/Zm00001d047935/Zm00001d050134	-/-/-/-/aspartate kinase-homoserine dehydrogenase1	5
BP	GO:0032886	regulation of microtubule-based process	5/3483	22/22306	0.252447	0.615356	Zm00001d005269/Zm00001d021504/Zm00001d033414/Zm00001d036090/Zm00001d048104	-/-/-/-/-	5
BP	GO:0046451	diaminopimelate metabolic process	5/3483	22/22306	0.252447	0.615356	Zm00001d013223/Zm00001d023429/Zm00001d037282/Zm00001d047935/Zm00001d050134	-/-/-/-/aspartate kinase-homoserine dehydrogenase1	5
BP	GO:0070936	protein K48-linked ubiquitination	5/3483	22/22306	0.252447	0.615356	Zm00001d000390/Zm00001d016142/Zm00001d021498/Zm00001d044551/Zm00001d045133	-/-/-/-/-	5
BP	GO:0071824	protein-DNA complex subunit organization	36/3483	206/22306	0.25606	0.623463	Zm00001d002056/Zm00001d003274/Zm00001d009424/Zm00001d011252/Zm00001d012423/Zm00001d012439/Zm00001d013439/Zm00001d013440/Zm00001d014255/Zm00001d015765/Zm00001d015886/Zm00001d016439/Zm00001d019789/Zm00001d026153/Zm00001d029180/Zm00001d029473/Zm00001d030573/Zm00001d032978/Zm00001d033533/Zm00001d037832/Zm00001d038570/Zm00001d039729/Zm00001d039821/Zm00001d042954/Zm00001d044220/Zm00001d044330/Zm00001d0…	-/-/-/MYB-related-transcription factor 101/-/H4C7/-/-/-/-/-/-/-/-/-/-/-/-/-/-/-/-/-/H4C7/centromere protein C 1/MYB-related-transcription factor 6/-/-/-/-/-/minichromosome maintenance7/-/-/-/-	36
BP	GO:0006760	folic acid-containing compound metabolic process	8/3483	39/22306	0.256717	0.623661	Zm00001d005614/Zm00001d007318/Zm00001d009738/Zm00001d023817/Zm00001d024612/Zm00001d042661/Zm00001d048514/Zm00001d053900	-/-/-/-/-/-/brown midrib4/-	8
BP	GO:0042168	heme metabolic process	8/3483	39/22306	0.256717	0.623661	Zm00001d002358/Zm00001d002511/Zm00001d014715/Zm00001d015366/Zm00001d027950/Zm00001d029074/Zm00001d047527/Zm00001d048318	necrotic4/-/-/camouflage1/-/lesion22/-/-	8
BP	GO:0009073	aromatic amino acid family biosynthetic process	14/3483	74/22306	0.259087	0.628713	Zm00001d003395/Zm00001d016006/Zm00001d023724/Zm00001d024393/Zm00001d025652/Zm00001d028536/Zm00001d028712/Zm00001d029548/Zm00001d037110/Zm00001d038142/Zm00001d043951/Zm00001d046719/Zm00001d048315/Zm00001d048461	anthranilate synthase homolog1/-/-/-/-/-/-/csu323/-/-/-/ARID-transcription factor 10/-/blue fluorescent1	14
BP	GO:0061640	cytoskeleton-dependent cytokinesis	15/3483	80/22306	0.260702	0.631926	Zm00001d002056/Zm00001d005250/Zm00001d005269/Zm00001d021731/Zm00001d023760/Zm00001d023908/Zm00001d027412/Zm00001d030121/Zm00001d034082/Zm00001d034770/Zm00001d042262/Zm00001d044273/Zm00001d045354/Zm00001d049510/Zm00001d053930	-/cellulose synthase9/-/-/chitin synthase homolog1/-/dicer-like 101/roothairless6/-/cellulose synthase6/-/-/-/-/-	15
BP	GO:0009814	defense response, incompatible interaction	9/3483	45/22306	0.262623	0.634453	Zm00001d005507/Zm00001d007938/Zm00001d011401/Zm00001d014562/Zm00001d017139/Zm00001d026263/Zm00001d033228/Zm00001d038097/Zm00001d042620	-/-/-/-/hydroxymethylbutenyl diphosphate synthase1/-/-/-/-	9
BP	GO:0062012	regulation of small molecule metabolic process	9/3483	45/22306	0.262623	0.634453	Zm00001d003198/Zm00001d008613/Zm00001d011595/Zm00001d013389/Zm00001d016856/Zm00001d028024/Zm00001d037110/Zm00001d037553/Zm00001d043194	-/-/-/-/calmodulin binding protein1/-/-/-/-	9
BP	GO:1901659	glycosyl compound biosynthetic process	9/3483	45/22306	0.262623	0.634453	Zm00001d011855/Zm00001d014912/Zm00001d021624/Zm00001d023833/Zm00001d034320/Zm00001d037208/Zm00001d041620/Zm00001d042005/Zm00001d053984	-/protein disulfide isomerase4/-/-/-/-/-/-/-	9
BP	GO:0045087	innate immune response	18/3483	98/22306	0.263506	0.635878	Zm00001d004655/Zm00001d005507/Zm00001d007938/Zm00001d011401/Zm00001d014562/Zm00001d017139/Zm00001d021498/Zm00001d025830/Zm00001d026263/Zm00001d027412/Zm00001d031580/Zm00001d033228/Zm00001d037381/Zm00001d038097/Zm00001d042620/Zm00001d043462/Zm00001d044273/Zm00001d045784	-/-/-/-/-/hydroxymethylbutenyl diphosphate synthase1/-/dicer-like4/-/dicer-like 101/-/-/-/-/-/-/-/-	18
BP	GO:0015994	chlorophyll metabolic process	6/3483	28/22306	0.265505	0.638085	Zm00001d008230/Zm00001d013651/Zm00001d014297/Zm00001d029074/Zm00001d029150/Zm00001d036046	-/-/histidine kinase3/lesion22/divinyl reductase1/-	6
BP	GO:0021700	developmental maturation	6/3483	28/22306	0.265505	0.638085	Zm00001d007158/Zm00001d008743/Zm00001d027412/Zm00001d031494/Zm00001d037110/Zm00001d040724	-/-/dicer-like 101/-/-/-	6
BP	GO:0030042	actin filament depolymerization	6/3483	28/22306	0.265505	0.638085	Zm00001d006372/Zm00001d012966/Zm00001d013141/Zm00001d029343/Zm00001d037497/Zm00001d042097	actin depolymerizing factor2/-/-/-/-/-	6
BP	GO:0006733	oxidoreduction coenzyme metabolic process	35/3483	201/22306	0.267069	0.638085	Zm00001d000123/Zm00001d003083/Zm00001d005144/Zm00001d005925/Zm00001d006107/Zm00001d006185/Zm00001d006221/Zm00001d011835/Zm00001d012510/Zm00001d014030/Zm00001d017119/Zm00001d020309/Zm00001d020771/Zm00001d021310/Zm00001d021770/Zm00001d027999/Zm00001d028270/Zm00001d028554/Zm00001d030020/Zm00001d030701/Zm00001d032172/Zm00001d032695/Zm00001d037278/Zm00001d038792/Zm00001d040166/Zm00001d040599/Zm00001d0…	-/-/-/-/pyruvate dehydrogenase3/-/triose phosphate isomerase2/-/-/-/-/-/-/-/-/-/-/-/pyruvate kinase1/-/-/malate dehydrogenase4/phosphofructose kinase1/hexokinase2/-/-/-/-/-/-/-/bZIP-transcription factor 105/-/-/-	35
BP	GO:0045454	cell redox homeostasis	35/3483	201/22306	0.267069	0.638085	Zm00001d002854/Zm00001d003654/Zm00001d004136/Zm00001d004977/Zm00001d008736/Zm00001d008930/Zm00001d011543/Zm00001d013061/Zm00001d013985/Zm00001d014912/Zm00001d015747/Zm00001d017379/Zm00001d017417/Zm00001d018238/Zm00001d018454/Zm00001d018827/Zm00001d022403/Zm00001d023707/Zm00001d027511/Zm00001d028726/Zm00001d028915/Zm00001d030867/Zm00001d031945/Zm00001d033204/Zm00001d033945/Zm00001d034491/Zm00001d0…	-/protein disulfide isomerase10/-/-/-/-/-/-/-/protein disulfide isomerase4/-/-/-/-/-/-/-/thioredoxin M1/catalase2/protein disulfide isomerase9/-/-/-/methyl binding domain115/C2C2-GATA-transcription factor 34/-/-/protein disulfide isomerase7/thioredoxin h homolog1/-/-/-/-/-/-	35
BP	GO:0000082	G1/S transition of mitotic cell cycle	4/3483	17/22306	0.268544	0.638085	Zm00001d007407/Zm00001d031678/Zm00001d052695/Zm00001d053930	related to retinoblastoma1/retinoblastoma family3/-/-	4
BP	GO:0007584	response to nutrient	4/3483	17/22306	0.268544	0.638085	Zm00001d007892/Zm00001d013984/Zm00001d032659/Zm00001d033383	-/-/-/hydroxymethylpyrimidine phosphate synthase1	4
BP	GO:0009873	ethylene-activated signaling pathway	4/3483	17/22306	0.268544	0.638085	Zm00001d025705/Zm00001d033642/Zm00001d037604/Zm00001d039341	-/ethylene receptor1-25/-/ethylene insensitive 2	4
BP	GO:0015995	chlorophyll biosynthetic process	4/3483	17/22306	0.268544	0.638085	Zm00001d008230/Zm00001d029074/Zm00001d029150/Zm00001d036046	-/lesion22/divinyl reductase1/-	4
BP	GO:0035493	SNARE complex assembly	4/3483	17/22306	0.268544	0.638085	Zm00001d005170/Zm00001d006916/Zm00001d022199/Zm00001d024205	-/-/-/-	4
BP	GO:0042276	error-prone translesion synthesis	4/3483	17/22306	0.268544	0.638085	Zm00001d014568/Zm00001d031751/Zm00001d043404/Zm00001d053264	-/-/-/-	4
BP	GO:0044843	cell cycle G1/S phase transition	4/3483	17/22306	0.268544	0.638085	Zm00001d007407/Zm00001d031678/Zm00001d052695/Zm00001d053930	related to retinoblastoma1/retinoblastoma family3/-/-	4
BP	GO:0070507	regulation of microtubule cytoskeleton organization	4/3483	17/22306	0.268544	0.638085	Zm00001d005269/Zm00001d021504/Zm00001d033414/Zm00001d048104	-/-/-/-	4
BP	GO:0080156	mitochondrial mRNA modification	4/3483	17/22306	0.268544	0.638085	Zm00001d012052/Zm00001d038760/Zm00001d041750/Zm00001d049043	-/-/-/-	4
BP	GO:0034661	ncRNA catabolic process	7/3483	34/22306	0.274321	0.649677	Zm00001d001983/Zm00001d009522/Zm00001d021621/Zm00001d022236/Zm00001d027412/Zm00001d027487/Zm00001d027726	-/RNase PH homolog/-/-/dicer-like 101/-/-	7
BP	GO:0048571	long-day photoperiodism	7/3483	34/22306	0.274321	0.649677	Zm00001d019907/Zm00001d020874/Zm00001d029133/Zm00001d036296/Zm00001d045944/Zm00001d046967/Zm00001d052838	set domain gene128/CCAAT-HAP5-transcription factor 516/-/enhancer of zeste1/-/CCAAT-HAP5-transcription factor 57/CCAAT-HAP5-transcription factor 514	7
BP	GO:0048574	long-day photoperiodism, flowering	7/3483	34/22306	0.274321	0.649677	Zm00001d019907/Zm00001d020874/Zm00001d029133/Zm00001d036296/Zm00001d045944/Zm00001d046967/Zm00001d052838	set domain gene128/CCAAT-HAP5-transcription factor 516/-/enhancer of zeste1/-/CCAAT-HAP5-transcription factor 57/CCAAT-HAP5-transcription factor 514	7
BP	GO:0006778	porphyrin-containing compound metabolic process	13/3483	69/22306	0.274766	0.650018	Zm00001d002358/Zm00001d002511/Zm00001d008230/Zm00001d013651/Zm00001d014297/Zm00001d014715/Zm00001d015366/Zm00001d027950/Zm00001d029074/Zm00001d029150/Zm00001d036046/Zm00001d047527/Zm00001d048318	necrotic4/-/-/-/histidine kinase3/-/camouflage1/-/lesion22/divinyl reductase1/-/-/-	13
BP	GO:0000956	nuclear-transcribed mRNA catabolic process	26/3483	147/22306	0.275096	0.65009	Zm00001d001983/Zm00001d003611/Zm00001d005089/Zm00001d005502/Zm00001d009522/Zm00001d010901/Zm00001d014187/Zm00001d015955/Zm00001d017303/Zm00001d017883/Zm00001d017982/Zm00001d019314/Zm00001d019920/Zm00001d021621/Zm00001d022236/Zm00001d027278/Zm00001d027726/Zm00001d027811/Zm00001d029133/Zm00001d029754/Zm00001d038671/Zm00001d048546/Zm00001d051183/Zm00001d051678/Zm00001d052218/Zm00001d052561	-/-/-/-/RNase PH homolog/-/-/-/-/-/-/-/-/-/-/-/-/-/-/-/-/-/-/-/-/-	26
BP	GO:0009658	chloroplast organization	24/3483	135/22306	0.276444	0.651163	Zm00001d002951/Zm00001d006700/Zm00001d008970/Zm00001d009723/Zm00001d011716/Zm00001d012861/Zm00001d015837/Zm00001d018124/Zm00001d018756/Zm00001d021716/Zm00001d023760/Zm00001d025453/Zm00001d027230/Zm00001d030149/Zm00001d032615/Zm00001d033181/Zm00001d034082/Zm00001d034962/Zm00001d043666/Zm00001d044903/Zm00001d048717/Zm00001d049297/Zm00001d052163/Zm00001d053664	-/mTERF-domain protein9/-/plastid transcriptionally active14/-/-/-/mTERF domain protein21/mTERF-domain protein24/chloroplast RNA processing1/chitin synthase homolog1/-/-/-/-/-/-/embryo specific2/-/-/-/-/-/-	24
BP	GO:0044275	cellular carbohydrate catabolic process	15/3483	81/22306	0.277129	0.651163	Zm00001d002085/Zm00001d004438/Zm00001d006221/Zm00001d021310/Zm00001d022206/Zm00001d027309/Zm00001d028926/Zm00001d032333/Zm00001d033795/Zm00001d042066/Zm00001d042507/Zm00001d042842/Zm00001d044693/Zm00001d050645/Zm00001d053741	-/pullulanase-type starch debranching enzyme1/triose phosphate isomerase2/-/-/-/-/-/-/cytokinin response regulator5/-/starch phoshorylase2/-/-/autophagy11a	15
BP	GO:0009259	ribonucleotide metabolic process	61/3483	362/22306	0.277279	0.651163	Zm00001d001970/Zm00001d002003/Zm00001d005925/Zm00001d006107/Zm00001d006221/Zm00001d011750/Zm00001d011855/Zm00001d013389/Zm00001d014772/Zm00001d014778/Zm00001d014912/Zm00001d015427/Zm00001d018758/Zm00001d020204/Zm00001d020309/Zm00001d020771/Zm00001d021297/Zm00001d021310/Zm00001d021554/Zm00001d023833/Zm00001d024034/Zm00001d025286/Zm00001d026515/Zm00001d027871/Zm00001d028207/Zm00001d028270/Zm00001d0…	-/-/-/pyruvate dehydrogenase3/triose phosphate isomerase2/-/-/-/-/-/protein disulfide isomerase4/-/succinate dehydrogenase1/-/-/-/-/-/-/-/-/iron-sulfur protein1/viviparous10/adenylosuccinate synthetase/-/-/-/-/-/pyruvate kinase1/-/-/-/-/-/-/-/phosphofructose kinase1/-/-/-/hexokinase2/-/-/-/-/-/-/-/-/-/-/-/-/-/-/-/-/-/vacuolar proton pump3/-	61
BP	GO:0042180	cellular ketone metabolic process	16/3483	87/22306	0.277789	0.651163	Zm00001d000123/Zm00001d001881/Zm00001d003198/Zm00001d011595/Zm00001d012510/Zm00001d013992/Zm00001d015599/Zm00001d015975/Zm00001d016856/Zm00001d019698/Zm00001d020696/Zm00001d027999/Zm00001d028024/Zm00001d029036/Zm00001d045322/Zm00001d047869	-/-/-/-/-/-/-/-/calmodulin binding protein1/-/-/-/-/-/-/-	16
BP	GO:0006955	immune response	18/3483	99/22306	0.278363	0.651163	Zm00001d004655/Zm00001d005507/Zm00001d007938/Zm00001d011401/Zm00001d014562/Zm00001d017139/Zm00001d021498/Zm00001d025830/Zm00001d026263/Zm00001d027412/Zm00001d031580/Zm00001d033228/Zm00001d037381/Zm00001d038097/Zm00001d042620/Zm00001d043462/Zm00001d044273/Zm00001d045784	-/-/-/-/-/hydroxymethylbutenyl diphosphate synthase1/-/dicer-like4/-/dicer-like 101/-/-/-/-/-/-/-/-	18
BP	GO:0006720	isoprenoid metabolic process	33/3483	190/22306	0.279731	0.651163	Zm00001d002349/Zm00001d009520/Zm00001d010274/Zm00001d010607/Zm00001d012197/Zm00001d012212/Zm00001d012312/Zm00001d014367/Zm00001d015053/Zm00001d017139/Zm00001d017766/Zm00001d018488/Zm00001d023690/Zm00001d025545/Zm00001d026064/Zm00001d027271/Zm00001d027936/Zm00001d028024/Zm00001d028094/Zm00001d028152/Zm00001d033222/Zm00001d033945/Zm00001d034387/Zm00001d034516/Zm00001d039142/Zm00001d039634/Zm00001d0…	kaurene synthase3/-/isopentenyl pyrophosphate isomerase2/-/diphosphocytidyl methyl erythritol synthase2/gibberellin 20-oxidase5/-/-/terpene synthase2/hydroxymethylbutenyl diphosphate synthase1/nine-cis-epoxycarotenoid dioxygenase8/cytochrome P450 13/-/zeaxanthin epoxidase2/-/-/viviparous5/-/-/-/viviparous14/C2C2-GATA-transcription factor 34/aldehyde oxidase1/-/-/dwarf plant1/-/-/-/white cap1/meth…	33
BP	GO:0019682	glyceraldehyde-3-phosphate metabolic process	8/3483	40/22306	0.280487	0.651163	Zm00001d006185/Zm00001d006221/Zm00001d017119/Zm00001d017139/Zm00001d021310/Zm00001d030701/Zm00001d047587/Zm00001d048324	-/triose phosphate isomerase2/-/hydroxymethylbutenyl diphosphate synthase1/-/-/bZIP-transcription factor 105/-	8
BP	GO:0051156	glucose 6-phosphate metabolic process	8/3483	40/22306	0.280487	0.651163	Zm00001d005925/Zm00001d006185/Zm00001d017119/Zm00001d020771/Zm00001d030701/Zm00001d038792/Zm00001d047587/Zm00001d048324	-/-/-/-/-/hexokinase2/bZIP-transcription factor 105/-	8
BP	GO:0009092	homoserine metabolic process	5/3483	23/22306	0.284423	0.651163	Zm00001d031024/Zm00001d037282/Zm00001d050133/Zm00001d050134/Zm00001d053816	-/-/-/aspartate kinase-homoserine dehydrogenase1/-	5
BP	GO:0043966	histone H3 acetylation	5/3483	23/22306	0.284423	0.651163	Zm00001d024953/Zm00001d025108/Zm00001d025705/Zm00001d029473/Zm00001d050529	-/-/-/-/-	5
BP	GO:0080167	response to karrikin	5/3483	23/22306	0.284423	0.651163	Zm00001d001924/Zm00001d002085/Zm00001d012510/Zm00001d033110/Zm00001d047583	-/-/-/-/-	5
BP	GO:0015991	ATP hydrolysis coupled proton transport	9/3483	46/22306	0.284883	0.651163	Zm00001d012446/Zm00001d021721/Zm00001d028436/Zm00001d035702/Zm00001d036018/Zm00001d043991/Zm00001d047910/Zm00001d053010/Zm00001d053765	-/-/-/-/-/DNA binding activity2/-/-/vacuolar proton pump3	9
BP	GO:0046854	phosphatidylinositol phosphorylation	9/3483	46/22306	0.284883	0.651163	Zm00001d008310/Zm00001d029211/Zm00001d032238/Zm00001d033110/Zm00001d033645/Zm00001d037332/Zm00001d049076/Zm00001d050089/Zm00001d051988	-/-/-/-/-/-/-/GRMZM2G153722/-	9
BP	GO:0090558	plant epidermis development	9/3483	46/22306	0.284883	0.651163	Zm00001d002144/Zm00001d007158/Zm00001d008743/Zm00001d012079/Zm00001d023262/Zm00001d040724/Zm00001d044273/Zm00001d045738/Zm00001d053930	-/-/-/-/brick3/-/-/-/-	9
BP	GO:0090662	ATP hydrolysis coupled transmembrane transport	9/3483	46/22306	0.284883	0.651163	Zm00001d012446/Zm00001d021721/Zm00001d028436/Zm00001d035702/Zm00001d036018/Zm00001d043991/Zm00001d047910/Zm00001d053010/Zm00001d053765	-/-/-/-/-/DNA binding activity2/-/-/vacuolar proton pump3	9
BP	GO:0099131	ATP hydrolysis coupled ion transmembrane transport	9/3483	46/22306	0.284883	0.651163	Zm00001d012446/Zm00001d021721/Zm00001d028436/Zm00001d035702/Zm00001d036018/Zm00001d043991/Zm00001d047910/Zm00001d053010/Zm00001d053765	-/-/-/-/-/DNA binding activity2/-/-/vacuolar proton pump3	9
BP	GO:0006446	regulation of translational initiation	3/3483	12/22306	0.285466	0.651163	Zm00001d003198/Zm00001d014246/Zm00001d033046	-/-/-	3
BP	GO:0006641	triglyceride metabolic process	3/3483	12/22306	0.285466	0.651163	Zm00001d002085/Zm00001d007442/Zm00001d037760	-/-/-	3
BP	GO:0009090	homoserine biosynthetic process	3/3483	12/22306	0.285466	0.651163	Zm00001d037282/Zm00001d050133/Zm00001d050134	-/-/aspartate kinase-homoserine dehydrogenase1	3
BP	GO:0009438	methylglyoxal metabolic process	3/3483	12/22306	0.285466	0.651163	Zm00001d001881/Zm00001d015975/Zm00001d029036	-/-/-	3
BP	GO:0009788	negative regulation of abscisic acid-activated signaling pathway	3/3483	12/22306	0.285466	0.651163	Zm00001d010470/Zm00001d037110/Zm00001d038106	-/-/-	3
BP	GO:0009937	regulation of gibberellic acid mediated signaling pathway	3/3483	12/22306	0.285466	0.651163	Zm00001d019670/Zm00001d031938/Zm00001d037110	-/-/-	3
BP	GO:0015969	guanosine tetraphosphate metabolic process	3/3483	12/22306	0.285466	0.651163	Zm00001d029095/Zm00001d047506/Zm00001d051545	-/-/-	3
BP	GO:0018206	peptidyl-methionine modification	3/3483	12/22306	0.285466	0.651163	Zm00001d011445/Zm00001d038006/Zm00001d052009	-/-/-	3
BP	GO:0030834	regulation of actin filament depolymerization	3/3483	12/22306	0.285466	0.651163	Zm00001d029343/Zm00001d037497/Zm00001d042097	-/-/-	3
BP	GO:0033169	histone H3-K9 demethylation	3/3483	12/22306	0.285466	0.651163	Zm00001d006580/Zm00001d051849/Zm00001d054070	-/JUMONJI-transcription factor 21/JUMONJI-transcription factor 12	3
BP	GO:0034035	purine ribonucleoside bisphosphate metabolic process	3/3483	12/22306	0.285466	0.651163	Zm00001d029095/Zm00001d047506/Zm00001d051545	-/-/-	3
BP	GO:0042182	ketone catabolic process	3/3483	12/22306	0.285466	0.651163	Zm00001d001881/Zm00001d015975/Zm00001d029036	-/-/-	3
BP	GO:0051596	methylglyoxal catabolic process	3/3483	12/22306	0.285466	0.651163	Zm00001d001881/Zm00001d015975/Zm00001d029036	-/-/-	3
BP	GO:0098781	ncRNA transcription	3/3483	12/22306	0.285466	0.651163	Zm00001d023587/Zm00001d037832/Zm00001d038266	-/-/-	3
BP	GO:1901420	negative regulation of response to alcohol	3/3483	12/22306	0.285466	0.651163	Zm00001d010470/Zm00001d037110/Zm00001d038106	-/-/-	3
BP	GO:1901879	regulation of protein depolymerization	3/3483	12/22306	0.285466	0.651163	Zm00001d029343/Zm00001d037497/Zm00001d042097	-/-/-	3
BP	GO:1905958	negative regulation of cellular response to alcohol	3/3483	12/22306	0.285466	0.651163	Zm00001d010470/Zm00001d037110/Zm00001d038106	-/-/-	3
BP	GO:0051304	chromosome separation	10/3483	52/22306	0.288037	0.656186	Zm00001d006499/Zm00001d007585/Zm00001d021635/Zm00001d023279/Zm00001d023839/Zm00001d037979/Zm00001d037981/Zm00001d042639/Zm00001d044630/Zm00001d053917	-/-/-/-/-/-/-/-/-/-	10
BP	GO:0009108	coenzyme biosynthetic process	48/3483	283/22306	0.288274	0.656186	Zm00001d000123/Zm00001d001970/Zm00001d002326/Zm00001d003462/Zm00001d005925/Zm00001d006107/Zm00001d006221/Zm00001d007318/Zm00001d007936/Zm00001d008320/Zm00001d010920/Zm00001d011835/Zm00001d012510/Zm00001d020309/Zm00001d020771/Zm00001d021297/Zm00001d021310/Zm00001d023817/Zm00001d024612/Zm00001d026515/Zm00001d027352/Zm00001d027999/Zm00001d028270/Zm00001d028554/Zm00001d030020/Zm00001d030657/Zm00001d0…	-/-/adenosylmethionine aminotransferase1/LIP1/-/pyruvate dehydrogenase3/triose phosphate isomerase2/-/-/-/-/-/-/-/-/-/-/-/-/viviparous10/-/-/-/-/pyruvate kinase1/-/-/-/-/-/-/phosphofructose kinase1/-/hexokinase2/-/-/-/-/-/LIP1P-2/-/-/-/brown midrib4/-/-/-/small kernel2	48
BP	GO:0006163	purine nucleotide metabolic process	58/3483	345/22306	0.289737	0.658825	Zm00001d001970/Zm00001d002003/Zm00001d005925/Zm00001d006107/Zm00001d006221/Zm00001d008417/Zm00001d011750/Zm00001d013389/Zm00001d014772/Zm00001d014778/Zm00001d015115/Zm00001d015427/Zm00001d018758/Zm00001d020204/Zm00001d020309/Zm00001d020771/Zm00001d021297/Zm00001d021310/Zm00001d021554/Zm00001d023833/Zm00001d024034/Zm00001d025286/Zm00001d026515/Zm00001d027256/Zm00001d027871/Zm00001d028207/Zm00001d0…	-/-/-/pyruvate dehydrogenase3/triose phosphate isomerase2/-/-/-/-/-/-/-/succinate dehydrogenase1/-/-/-/-/-/-/-/-/iron-sulfur protein1/viviparous10/-/adenylosuccinate synthetase/-/-/-/-/-/pyruvate kinase1/-/-/-/-/-/phosphofructose kinase1/-/-/-/hexokinase2/-/-/-/-/-/-/-/-/-/-/-/-/-/-/-/vacuolar proton pump3/-	58
BP	GO:0006261	DNA-dependent DNA replication	31/3483	179/22306	0.293282	0.662054	Zm00001d002056/Zm00001d002510/Zm00001d003266/Zm00001d010567/Zm00001d011877/Zm00001d016581/Zm00001d018243/Zm00001d018287/Zm00001d020978/Zm00001d023462/Zm00001d023801/Zm00001d023908/Zm00001d024423/Zm00001d024509/Zm00001d024953/Zm00001d026402/Zm00001d027479/Zm00001d031751/Zm00001d034399/Zm00001d036531/Zm00001d039446/Zm00001d042713/Zm00001d042810/Zm00001d043277/Zm00001d043840/Zm00001d044358/Zm00001d0…	-/-/-/-/-/-/-/-/-/-/-/-/DNA polymerase like1/-/-/white seedling2/-/-/-/-/-/-/-/-/origin recognition complex4/-/origin recognition complex1/-/-/minichromosome maintenance7/-	31
BP	GO:0006402	mRNA catabolic process	31/3483	179/22306	0.293282	0.662054	Zm00001d001983/Zm00001d003611/Zm00001d005089/Zm00001d005502/Zm00001d009522/Zm00001d010901/Zm00001d014187/Zm00001d015955/Zm00001d017303/Zm00001d017883/Zm00001d017982/Zm00001d018891/Zm00001d019314/Zm00001d019920/Zm00001d021621/Zm00001d022236/Zm00001d025673/Zm00001d027278/Zm00001d027726/Zm00001d027811/Zm00001d029133/Zm00001d029754/Zm00001d030398/Zm00001d032875/Zm00001d038671/Zm00001d048546/Zm00001d0…	-/-/-/-/RNase PH homolog/-/-/-/-/-/-/chloroplast RNA processing4/-/-/-/-/-/-/-/-/-/-/-/-/-/-/-/-/-/-/-	31
BP	GO:0009119	ribonucleoside metabolic process	14/3483	76/22306	0.293563	0.662054	Zm00001d001970/Zm00001d011855/Zm00001d014912/Zm00001d017897/Zm00001d023833/Zm00001d026515/Zm00001d029095/Zm00001d034320/Zm00001d037208/Zm00001d041620/Zm00001d042005/Zm00001d047506/Zm00001d051545/Zm00001d053984	-/-/protein disulfide isomerase4/-/-/viviparous10/-/-/-/-/-/-/-/-	14
BP	GO:1990542	mitochondrial transmembrane transport	17/3483	94/22306	0.293815	0.662054	Zm00001d003846/Zm00001d004051/Zm00001d005373/Zm00001d012629/Zm00001d012930/Zm00001d014090/Zm00001d017847/Zm00001d027699/Zm00001d028485/Zm00001d028971/Zm00001d034520/Zm00001d034521/Zm00001d043834/Zm00001d044459/Zm00001d048506/Zm00001d050123/Zm00001d054089	-/-/-/-/-/chaperonin 1/-/-/-/-/-/-/-/-/-/-/-	17
BP	GO:0010647	positive regulation of cell communication	6/3483	29/22306	0.294212	0.662054	Zm00001d018902/Zm00001d019287/Zm00001d028593/Zm00001d034055/Zm00001d034862/Zm00001d037110	-/-/-/-/-/-	6
BP	GO:0030198	extracellular matrix organization	6/3483	29/22306	0.294212	0.662054	Zm00001d007208/Zm00001d016452/Zm00001d019670/Zm00001d020970/Zm00001d034049/Zm00001d048337	-/-/-/dihydroflavonoid reductase1/-/-	6
BP	GO:0034614	cellular response to reactive oxygen species	6/3483	29/22306	0.294212	0.662054	Zm00001d002611/Zm00001d005812/Zm00001d025106/Zm00001d029170/Zm00001d031908/Zm00001d052101	-/-/-/superoxide dismutase4/-/chaperonin10	6
BP	GO:0043062	extracellular structure organization	6/3483	29/22306	0.294212	0.662054	Zm00001d007208/Zm00001d016452/Zm00001d019670/Zm00001d020970/Zm00001d034049/Zm00001d048337	-/-/-/dihydroflavonoid reductase1/-/-	6
BP	GO:0046132	pyrimidine ribonucleoside biosynthetic process	6/3483	29/22306	0.294212	0.662054	Zm00001d011855/Zm00001d014912/Zm00001d023833/Zm00001d037208/Zm00001d041620/Zm00001d042005	-/protein disulfide isomerase4/-/-/-/-	6
BP	GO:0046134	pyrimidine nucleoside biosynthetic process	6/3483	29/22306	0.294212	0.662054	Zm00001d011855/Zm00001d014912/Zm00001d023833/Zm00001d037208/Zm00001d041620/Zm00001d042005	-/protein disulfide isomerase4/-/-/-/-	6
BP	GO:0006896	Golgi to vacuole transport	7/3483	35/22306	0.300572	0.672052	Zm00001d004396/Zm00001d005062/Zm00001d006939/Zm00001d014303/Zm00001d025044/Zm00001d033488/Zm00001d035093	-/-/-/-/-/-/-	7
BP	GO:0009637	response to blue light	7/3483	35/22306	0.300572	0.672052	Zm00001d007445/Zm00001d015290/Zm00001d023314/Zm00001d024365/Zm00001d032353/Zm00001d037110/Zm00001d045944	-/-/-/-/blue-light receptor phototropin 2/-/-	7
BP	GO:0009968	negative regulation of signal transduction	7/3483	35/22306	0.300572	0.672052	Zm00001d010470/Zm00001d014705/Zm00001d017809/Zm00001d031938/Zm00001d037110/Zm00001d038106/Zm00001d051609	-/C3H-transcription factor 329/-/-/-/-/-	7
BP	GO:0010648	negative regulation of cell communication	7/3483	35/22306	0.300572	0.672052	Zm00001d010470/Zm00001d014705/Zm00001d017809/Zm00001d031938/Zm00001d037110/Zm00001d038106/Zm00001d051609	-/C3H-transcription factor 329/-/-/-/-/-	7
BP	GO:0023057	negative regulation of signaling	7/3483	35/22306	0.300572	0.672052	Zm00001d010470/Zm00001d014705/Zm00001d017809/Zm00001d031938/Zm00001d037110/Zm00001d038106/Zm00001d051609	-/C3H-transcription factor 329/-/-/-/-/-	7
BP	GO:0060968	regulation of gene silencing	7/3483	35/22306	0.300572	0.672052	Zm00001d013440/Zm00001d014977/Zm00001d018218/Zm00001d019789/Zm00001d021145/Zm00001d038093/Zm00001d052353	-/brahma1/GNAT-transcription factor 26/-/-/-/-	7
BP	GO:0098771	inorganic ion homeostasis	40/3483	235/22306	0.300908	0.672052	Zm00001d000228/Zm00001d002006/Zm00001d002022/Zm00001d007229/Zm00001d008911/Zm00001d010309/Zm00001d010324/Zm00001d012446/Zm00001d014445/Zm00001d014446/Zm00001d016926/Zm00001d017427/Zm00001d020892/Zm00001d021000/Zm00001d021844/Zm00001d022504/Zm00001d026479/Zm00001d027265/Zm00001d028330/Zm00001d028436/Zm00001d029034/Zm00001d029129/Zm00001d031418/Zm00001d034035/Zm00001d035093/Zm00001d036563/Zm00001d0…	-/plasma-membrane H+ATPase2/calcium exchanger2/-/-/SBP-transcription factor 11/-/-/-/-/-/-/-/-/-/-/-/-/-/-/-/-/-/glutathione transporter1/-/-/-/-/-/-/rotten ear2/-/-/-/-/acid phosphatase1/calcium pump3/-/-/-	40
BP	GO:0031123	RNA 3'-end processing	25/3483	143/22306	0.301136	0.672052	Zm00001d004154/Zm00001d005012/Zm00001d009522/Zm00001d012886/Zm00001d013599/Zm00001d018891/Zm00001d021621/Zm00001d022236/Zm00001d022535/Zm00001d023564/Zm00001d025673/Zm00001d027515/Zm00001d027726/Zm00001d036977/Zm00001d037449/Zm00001d038093/Zm00001d042291/Zm00001d044552/Zm00001d044657/Zm00001d046255/Zm00001d048253/Zm00001d051885/Zm00001d052407/Zm00001d052888/Zm00001d053559	-/-/RNase PH homolog/-/-/chloroplast RNA processing4/-/-/-/-/-/-/-/-/-/-/-/-/-/-/-/-/-/-/-	25
BP	GO:0006089	lactate metabolic process	4/3483	18/22306	0.306085	0.672675	Zm00001d001881/Zm00001d015975/Zm00001d019040/Zm00001d029036	-/-/-/-	4
BP	GO:0006109	regulation of carbohydrate metabolic process	4/3483	18/22306	0.306085	0.672675	Zm00001d008613/Zm00001d037110/Zm00001d037553/Zm00001d048349	-/-/-/-	4
BP	GO:0007094	mitotic spindle assembly checkpoint	4/3483	18/22306	0.306085	0.672675	Zm00001d007585/Zm00001d023279/Zm00001d042639/Zm00001d044630	-/-/-/-	4
BP	GO:0009065	glutamine family amino acid catabolic process	4/3483	18/22306	0.306085	0.672675	Zm00001d031749/Zm00001d033228/Zm00001d038841/Zm00001d047124	-/-/putative aldehyde dehydrogenase MIS1/-	4
BP	GO:0009164	nucleoside catabolic process	4/3483	18/22306	0.306085	0.672675	Zm00001d005343/Zm00001d005459/Zm00001d019279/Zm00001d031958	-/cytidine deaminase2/cytidine deaminase1/-	4
BP	GO:0009631	cold acclimation	4/3483	18/22306	0.306085	0.672675	Zm00001d005507/Zm00001d012052/Zm00001d017547/Zm00001d024463	-/-/-/-	4
BP	GO:0009933	meristem structural organization	4/3483	18/22306	0.306085	0.672675	Zm00001d028370/Zm00001d028818/Zm00001d033454/Zm00001d046973	-/defective kernel1/GRMZM2G039373/-	4
BP	GO:0015786	UDP-glucose transmembrane transport	4/3483	18/22306	0.306085	0.672675	Zm00001d002941/Zm00001d012747/Zm00001d043473/Zm00001d046467	-/-/-/-	4
BP	GO:0016926	protein desumoylation	4/3483	18/22306	0.306085	0.672675	Zm00001d007151/Zm00001d009236/Zm00001d012797/Zm00001d040796	-/-/-/-	4
BP	GO:0031577	spindle checkpoint	4/3483	18/22306	0.306085	0.672675	Zm00001d007585/Zm00001d023279/Zm00001d042639/Zm00001d044630	-/-/-/-	4
BP	GO:0034656	nucleobase-containing small molecule catabolic process	4/3483	18/22306	0.306085	0.672675	Zm00001d005343/Zm00001d005459/Zm00001d019279/Zm00001d031958	-/cytidine deaminase2/cytidine deaminase1/-	4
BP	GO:0043562	cellular response to nitrogen levels	4/3483	18/22306	0.306085	0.672675	Zm00001d001865/Zm00001d017966/Zm00001d024239/Zm00001d026335	cytokinin response regulator1/-/autophagy8d/autophagy8b	4
BP	GO:0051606	detection of stimulus	4/3483	18/22306	0.306085	0.672675	Zm00001d013262/Zm00001d021261/Zm00001d023833/Zm00001d028905	topoisomerase-like enzyme1/-/-/phytochromeB1	4
BP	GO:0071173	spindle assembly checkpoint	4/3483	18/22306	0.306085	0.672675	Zm00001d007585/Zm00001d023279/Zm00001d042639/Zm00001d044630	-/-/-/-	4
BP	GO:0071174	mitotic spindle checkpoint	4/3483	18/22306	0.306085	0.672675	Zm00001d007585/Zm00001d023279/Zm00001d042639/Zm00001d044630	-/-/-/-	4
BP	GO:0006874	cellular calcium ion homeostasis	9/3483	47/22306	0.307624	0.672675	Zm00001d002022/Zm00001d007229/Zm00001d008911/Zm00001d010324/Zm00001d026479/Zm00001d036563/Zm00001d039379/Zm00001d045944/Zm00001d047769	calcium exchanger2/-/-/-/-/-/-/-/calcium pump3	9
BP	GO:0032543	mitochondrial translation	9/3483	47/22306	0.307624	0.672675	Zm00001d002104/Zm00001d003879/Zm00001d010868/Zm00001d018274/Zm00001d032163/Zm00001d034826/Zm00001d042427/Zm00001d044277/Zm00001d045500	-/-/-/-/-/-/-/-/-	9
BP	GO:0046834	lipid phosphorylation	9/3483	47/22306	0.307624	0.672675	Zm00001d008310/Zm00001d029211/Zm00001d032238/Zm00001d033110/Zm00001d033645/Zm00001d037332/Zm00001d049076/Zm00001d050089/Zm00001d051988	-/-/-/-/-/-/-/GRMZM2G153722/-	9
BP	GO:0051123	RNA polymerase II transcriptional preinitiation complex assembly	9/3483	47/22306	0.307624	0.672675	Zm00001d015886/Zm00001d016439/Zm00001d029473/Zm00001d039729/Zm00001d046539/Zm00001d046579/Zm00001d047898/Zm00001d050616/Zm00001d053616	-/-/-/-/-/-/-/-/-	9
BP	GO:0097502	mannosylation	9/3483	47/22306	0.307624	0.672675	Zm00001d021731/Zm00001d022230/Zm00001d025989/Zm00001d030121/Zm00001d032188/Zm00001d039675/Zm00001d044554/Zm00001d048270/Zm00001d049510	-/-/Aux/IAA-transcription factor 43/roothairless6/-/-/-/-/-	9
BP	GO:0090174	organelle membrane fusion	16/3483	89/22306	0.310407	0.678076	Zm00001d002148/Zm00001d005170/Zm00001d006916/Zm00001d006939/Zm00001d011213/Zm00001d019091/Zm00001d020485/Zm00001d022199/Zm00001d024205/Zm00001d027808/Zm00001d031942/Zm00001d033488/Zm00001d034505/Zm00001d041693/Zm00001d042018/Zm00001d048147	-/-/-/-/-/-/-/-/-/-/-/-/-/-/-/-	16
BP	GO:0006006	glucose metabolic process	15/3483	83/22306	0.310947	0.678571	Zm00001d005925/Zm00001d006221/Zm00001d008314/Zm00001d008613/Zm00001d013428/Zm00001d017119/Zm00001d020771/Zm00001d021310/Zm00001d022206/Zm00001d028562/Zm00001d033746/Zm00001d035337/Zm00001d037553/Zm00001d043194/Zm00001d047587	-/triose phosphate isomerase2/-/-/phosphoglucomutase2/-/-/-/-/-/phosphoglucomutase1/-/-/-/bZIP-transcription factor 105	15
BP	GO:1901657	glycosyl compound metabolic process	24/3483	138/22306	0.315635	0.687821	Zm00001d001970/Zm00001d005343/Zm00001d005431/Zm00001d005459/Zm00001d011526/Zm00001d011855/Zm00001d014912/Zm00001d015115/Zm00001d017897/Zm00001d017977/Zm00001d019279/Zm00001d021624/Zm00001d023833/Zm00001d026515/Zm00001d027256/Zm00001d029095/Zm00001d031958/Zm00001d034320/Zm00001d037208/Zm00001d041620/Zm00001d042005/Zm00001d047506/Zm00001d051545/Zm00001d053984	-/-/-/cytidine deaminase2/-/-/protein disulfide isomerase4/-/-/histidine kinase1/cytidine deaminase1/-/-/viviparous10/-/-/-/-/-/-/-/-/-/-	24
BP	GO:0006020	inositol metabolic process	5/3483	24/22306	0.31709	0.687821	Zm00001d001974/Zm00001d026514/Zm00001d033110/Zm00001d033551/Zm00001d048201	-/-/-/-/-	5
BP	GO:0006768	biotin metabolic process	5/3483	24/22306	0.31709	0.687821	Zm00001d002326/Zm00001d030657/Zm00001d031691/Zm00001d037507/Zm00001d049380	adenosylmethionine aminotransferase1/-/-/-/-	5
BP	GO:0009102	biotin biosynthetic process	5/3483	24/22306	0.31709	0.687821	Zm00001d002326/Zm00001d030657/Zm00001d031691/Zm00001d037507/Zm00001d049380	adenosylmethionine aminotransferase1/-/-/-/-	5
BP	GO:0009850	auxin metabolic process	5/3483	24/22306	0.31709	0.687821	Zm00001d003002/Zm00001d014562/Zm00001d018487/Zm00001d034387/Zm00001d044225	-/-/-/aldehyde oxidase1/-	5
BP	GO:0046174	polyol catabolic process	5/3483	24/22306	0.31709	0.687821	Zm00001d002085/Zm00001d006221/Zm00001d021310/Zm00001d033110/Zm00001d033795	-/triose phosphate isomerase2/-/-/-	5
BP	GO:0010035	response to inorganic substance	49/3483	293/22306	0.322847	0.699609	Zm00001d001865/Zm00001d002611/Zm00001d002690/Zm00001d005347/Zm00001d005812/Zm00001d009700/Zm00001d010599/Zm00001d010954/Zm00001d012052/Zm00001d012439/Zm00001d013984/Zm00001d014297/Zm00001d014976/Zm00001d015477/Zm00001d016198/Zm00001d016615/Zm00001d016982/Zm00001d017427/Zm00001d017547/Zm00001d018197/Zm00001d018386/Zm00001d022598/Zm00001d023833/Zm00001d024521/Zm00001d025106/Zm00001d027511/Zm00001d0…	cytokinin response regulator1/-/plasma membrane intrinsic protein1/monodehydroascorbate reductase homolog1/-/-/-/-/-/H4C7/-/histidine kinase3/-/-/glutamate-oxaloacetic transaminase3/-/-/-/-/pyrophosphate-energized proton pump1/glutamate-oxaloacetate transaminase2/-/-/-/-/catalase2/-/-/-/-/superoxide dismutase4/-/-/-/-/-/SnRK2 serine threonine protein kinase8/-/starch phoshorylase2/-/H4C7/-/-/-/-/…	49
BP	GO:1901616	organic hydroxy compound catabolic process	6/3483	30/22306	0.323486	0.70012	Zm00001d002085/Zm00001d006221/Zm00001d021310/Zm00001d026064/Zm00001d033110/Zm00001d033795	-/triose phosphate isomerase2/-/-/-/-	6
BP	GO:0022904	respiratory electron transport chain	15/3483	84/22306	0.328263	0.70012	Zm00001d011750/Zm00001d014772/Zm00001d018758/Zm00001d019040/Zm00001d025286/Zm00001d028773/Zm00001d032455/Zm00001d033753/Zm00001d034244/Zm00001d038658/Zm00001d044459/Zm00001d047720/Zm00001d048102/Zm00001d050696/Zm00001d052436	-/-/succinate dehydrogenase1/-/iron-sulfur protein1/-/-/-/-/-/-/-/-/-/-	15
BP	GO:0044106	cellular amine metabolic process	15/3483	84/22306	0.328263	0.70012	Zm00001d003198/Zm00001d003395/Zm00001d015599/Zm00001d019698/Zm00001d023724/Zm00001d024281/Zm00001d024393/Zm00001d025652/Zm00001d026334/Zm00001d026586/Zm00001d028536/Zm00001d029548/Zm00001d032815/Zm00001d038142/Zm00001d048461	-/anthranilate synthase homolog1/-/-/-/polyamine oxidase1/-/-/-/-/-/csu323/-/-/blue fluorescent1	15
BP	GO:0044282	small molecule catabolic process	46/3483	275/22306	0.328876	0.70012	Zm00001d001881/Zm00001d002085/Zm00001d002377/Zm00001d005343/Zm00001d005459/Zm00001d006221/Zm00001d007892/Zm00001d010478/Zm00001d011526/Zm00001d013234/Zm00001d013428/Zm00001d015599/Zm00001d015975/Zm00001d018468/Zm00001d018487/Zm00001d018902/Zm00001d019054/Zm00001d019279/Zm00001d019698/Zm00001d021310/Zm00001d023437/Zm00001d026064/Zm00001d026311/Zm00001d029036/Zm00001d031749/Zm00001d031958/Zm00001d0…	-/-/-/-/cytidine deaminase2/triose phosphate isomerase2/-/-/-/-/phosphoglucomutase2/-/-/formaldehyde dehydrogenase homolog1/-/-/-/cytidine deaminase1/-/-/glycine decarboxylase1/-/-/-/-/-/-/-/-/-/phosphoglucomutase1/-/-/-/-/-/-/putative aldehyde dehydrogenase MIS1/-/-/-/-/-/-/-/-	46
BP	GO:0055074	calcium ion homeostasis	9/3483	48/22306	0.330752	0.70012	Zm00001d002022/Zm00001d007229/Zm00001d008911/Zm00001d010324/Zm00001d026479/Zm00001d036563/Zm00001d039379/Zm00001d045944/Zm00001d047769	calcium exchanger2/-/-/-/-/-/-/-/calcium pump3	9
BP	GO:0000466	maturation of 5.8S rRNA from tricistronic rRNA transcript (SSU-rRNA, 5.8S rRNA, LSU-rRNA)	10/3483	54/22306	0.331242	0.70012	Zm00001d000432/Zm00001d009597/Zm00001d012886/Zm00001d018022/Zm00001d021621/Zm00001d027726/Zm00001d037449/Zm00001d039047/Zm00001d040768/Zm00001d048253	-/-/-/-/-/-/-/-/-/-	10
BP	GO:0032482	Rab protein signal transduction	10/3483	54/22306	0.331242	0.70012	Zm00001d006433/Zm00001d006509/Zm00001d011717/Zm00001d014278/Zm00001d017456/Zm00001d024612/Zm00001d037004/Zm00001d038709/Zm00001d046313/Zm00001d050915	-/-/-/-/ypt homolog4/-/-/-/-/ypt homolog3	10
BP	GO:0006000	fructose metabolic process	3/3483	13/22306	0.331483	0.70012	Zm00001d028562/Zm00001d028762/Zm00001d042536	-/-/fructokinase1	3
BP	GO:0009581	detection of external stimulus	3/3483	13/22306	0.331483	0.70012	Zm00001d013262/Zm00001d023833/Zm00001d028905	topoisomerase-like enzyme1/-/phytochromeB1	3
BP	GO:0009582	detection of abiotic stimulus	3/3483	13/22306	0.331483	0.70012	Zm00001d013262/Zm00001d023833/Zm00001d028905	topoisomerase-like enzyme1/-/phytochromeB1	3
BP	GO:0009813	flavonoid biosynthetic process	3/3483	13/22306	0.331483	0.70012	Zm00001d025134/Zm00001d042720/Zm00001d049541	-/-/brown midrib3	3
BP	GO:0010315	auxin efflux	3/3483	13/22306	0.331483	0.70012	Zm00001d018024/Zm00001d042345/Zm00001d043179	PIN-formed protein2/PIN-formed protein5/PIN-formed protein9	3
BP	GO:0016973	poly(A)+ mRNA export from nucleus	3/3483	13/22306	0.331483	0.70012	Zm00001d012030/Zm00001d028695/Zm00001d051838	-/-/-	3
BP	GO:0018026	peptidyl-lysine monomethylation	3/3483	13/22306	0.331483	0.70012	Zm00001d009723/Zm00001d024420/Zm00001d036004	plastid transcriptionally active14/-/-	3
BP	GO:0030865	cortical cytoskeleton organization	3/3483	13/22306	0.331483	0.70012	Zm00001d023262/Zm00001d023735/Zm00001d024857	brick3/-/discordia1	3
BP	GO:0033157	regulation of intracellular protein transport	3/3483	13/22306	0.331483	0.70012	Zm00001d034914/Zm00001d035889/Zm00001d054076	-/-/-	3
BP	GO:0034508	centromere complex assembly	3/3483	13/22306	0.331483	0.70012	Zm00001d003274/Zm00001d032978/Zm00001d044220	-/-/centromere protein C 1	3
BP	GO:0045037	protein import into chloroplast stroma	3/3483	13/22306	0.331483	0.70012	Zm00001d006588/Zm00001d025453/Zm00001d032615	-/-/-	3
BP	GO:0046838	phosphorylated carbohydrate dephosphorylation	3/3483	13/22306	0.331483	0.70012	Zm00001d027309/Zm00001d033110/Zm00001d044693	-/-/-	3
BP	GO:0051223	regulation of protein transport	3/3483	13/22306	0.331483	0.70012	Zm00001d034914/Zm00001d035889/Zm00001d054076	-/-/-	3
BP	GO:0051494	negative regulation of cytoskeleton organization	3/3483	13/22306	0.331483	0.70012	Zm00001d029343/Zm00001d037497/Zm00001d045323	-/-/double B-box zinc finger protein11	3
BP	GO:0070201	regulation of establishment of protein localization	3/3483	13/22306	0.331483	0.70012	Zm00001d034914/Zm00001d035889/Zm00001d054076	-/-/-	3
BP	GO:0070536	protein K63-linked deubiquitination	3/3483	13/22306	0.331483	0.70012	Zm00001d011512/Zm00001d025359/Zm00001d038871	-/-/-	3
BP	GO:0090087	regulation of peptide transport	3/3483	13/22306	0.331483	0.70012	Zm00001d034914/Zm00001d035889/Zm00001d054076	-/-/-	3
BP	GO:1902533	positive regulation of intracellular signal transduction	3/3483	13/22306	0.331483	0.70012	Zm00001d019287/Zm00001d034055/Zm00001d034862	-/-/-	3
BP	GO:1902904	negative regulation of supramolecular fiber organization	3/3483	13/22306	0.331483	0.70012	Zm00001d029343/Zm00001d037497/Zm00001d045323	-/-/double B-box zinc finger protein11	3
BP	GO:0055080	cation homeostasis	39/3483	232/22306	0.333517	0.70373	Zm00001d000228/Zm00001d002006/Zm00001d002022/Zm00001d007229/Zm00001d008911/Zm00001d010309/Zm00001d010324/Zm00001d012446/Zm00001d014445/Zm00001d014446/Zm00001d016926/Zm00001d017427/Zm00001d020892/Zm00001d021000/Zm00001d021844/Zm00001d022504/Zm00001d026479/Zm00001d027265/Zm00001d028330/Zm00001d028436/Zm00001d029034/Zm00001d029129/Zm00001d031418/Zm00001d034035/Zm00001d035093/Zm00001d036563/Zm00001d0…	-/plasma-membrane H+ATPase2/calcium exchanger2/-/-/SBP-transcription factor 11/-/-/-/-/-/-/-/-/-/-/-/-/-/-/-/-/-/glutathione transporter1/-/-/-/-/-/-/rotten ear2/-/-/-/-/calcium pump3/-/-/-	39
BP	GO:0000725	recombinational repair	19/3483	109/22306	0.33846	0.712773	Zm00001d002154/Zm00001d007227/Zm00001d007943/Zm00001d008259/Zm00001d010567/Zm00001d018287/Zm00001d018657/Zm00001d020001/Zm00001d021122/Zm00001d024953/Zm00001d034859/Zm00001d036181/Zm00001d036531/Zm00001d040389/Zm00001d041083/Zm00001d042640/Zm00001d044358/Zm00001d049190/Zm00001d053917	meiotic recombination protein 11 homolog A/-/-/-/-/-/-/-/-/-/-/-/-/-/-/-/-/minichromosome maintenance7/-	19
BP	GO:1901699	cellular response to nitrogen compound	19/3483	109/22306	0.33846	0.712773	Zm00001d005064/Zm00001d012824/Zm00001d014976/Zm00001d014977/Zm00001d017962/Zm00001d018863/Zm00001d020011/Zm00001d022598/Zm00001d023230/Zm00001d025830/Zm00001d027412/Zm00001d029133/Zm00001d030020/Zm00001d035579/Zm00001d037971/Zm00001d042661/Zm00001d043861/Zm00001d048891/Zm00001d052327	-/-/-/brahma1/-/hua enhancer1/-/-/-/dicer-like4/dicer-like 101/-/pyruvate kinase1/-/FHA-transcription factor 15/-/-/-/-	19
BP	GO:0051052	regulation of DNA metabolic process	18/3483	103/22306	0.340331	0.716017	Zm00001d002056/Zm00001d005502/Zm00001d007233/Zm00001d013440/Zm00001d013757/Zm00001d013887/Zm00001d019920/Zm00001d023908/Zm00001d024819/Zm00001d026313/Zm00001d026612/Zm00001d031291/Zm00001d041083/Zm00001d042302/Zm00001d044358/Zm00001d045354/Zm00001d047427/Zm00001d052353	-/-/-/-/-/-/-/-/-/-/-/-/-/-/-/-/-/-	18
BP	GO:0006627	protein processing involved in protein targeting to mitochondrion	4/3483	19/22306	0.344102	0.719758	Zm00001d014516/Zm00001d027672/Zm00001d038776/Zm00001d048102	-/-/-/-	4
BP	GO:0009396	folic acid-containing compound biosynthetic process	4/3483	19/22306	0.344102	0.719758	Zm00001d007318/Zm00001d023817/Zm00001d024612/Zm00001d048514	-/-/-/brown midrib4	4
BP	GO:0032006	regulation of TOR signaling	4/3483	19/22306	0.344102	0.719758	Zm00001d014413/Zm00001d019287/Zm00001d024463/Zm00001d034862	tel2-interacting protein1/-/-/-	4
BP	GO:0045931	positive regulation of mitotic cell cycle	4/3483	19/22306	0.344102	0.719758	Zm00001d007943/Zm00001d018657/Zm00001d024953/Zm00001d028143	-/-/-/-	4
BP	GO:0048532	anatomical structure arrangement	4/3483	19/22306	0.344102	0.719758	Zm00001d028370/Zm00001d028818/Zm00001d033454/Zm00001d046973	-/defective kernel1/GRMZM2G039373/-	4
BP	GO:0071369	cellular response to ethylene stimulus	4/3483	19/22306	0.344102	0.719758	Zm00001d025705/Zm00001d033642/Zm00001d037604/Zm00001d039341	-/ethylene receptor1-25/-/ethylene insensitive 2	4
BP	GO:0072527	pyrimidine-containing compound metabolic process	15/3483	85/22306	0.345799	0.722611	Zm00001d007318/Zm00001d011183/Zm00001d011855/Zm00001d014912/Zm00001d015484/Zm00001d017790/Zm00001d017966/Zm00001d019054/Zm00001d021844/Zm00001d023833/Zm00001d028330/Zm00001d033383/Zm00001d037208/Zm00001d041620/Zm00001d042005	-/thiamine biosynthesis1/-/protein disulfide isomerase4/-/-/-/-/-/-/-/hydroxymethylpyrimidine phosphate synthase1/-/-/-	15
BP	GO:0006885	regulation of pH	13/3483	73/22306	0.349184	0.724258	Zm00001d002006/Zm00001d012446/Zm00001d020892/Zm00001d021000/Zm00001d021844/Zm00001d022504/Zm00001d027265/Zm00001d028330/Zm00001d028436/Zm00001d035093/Zm00001d038517/Zm00001d041590/Zm00001d047910	plasma-membrane H+ATPase2/-/-/-/-/-/-/-/-/-/-/rotten ear2/-	13
BP	GO:0000077	DNA damage checkpoint	5/3483	25/22306	0.350171	0.724258	Zm00001d002154/Zm00001d018057/Zm00001d036531/Zm00001d040166/Zm00001d047873	meiotic recombination protein 11 homolog A/-/-/-/-	5
BP	GO:0002098	tRNA wobble uridine modification	5/3483	25/22306	0.350171	0.724258	Zm00001d003621/Zm00001d013673/Zm00001d018070/Zm00001d018148/Zm00001d051608	-/-/-/-/-	5
BP	GO:0006098	pentose-phosphate shunt	5/3483	25/22306	0.350171	0.724258	Zm00001d006185/Zm00001d017119/Zm00001d030701/Zm00001d047587/Zm00001d048324	-/-/-/bZIP-transcription factor 105/-	5
BP	GO:0032101	regulation of response to external stimulus	5/3483	25/22306	0.350171	0.724258	Zm00001d011401/Zm00001d014562/Zm00001d018902/Zm00001d038097/Zm00001d043194	-/-/-/-/-	5
BP	GO:0032436	positive regulation of proteasomal ubiquitin-dependent protein catabolic process	5/3483	25/22306	0.350171	0.724258	Zm00001d003207/Zm00001d025750/Zm00001d028285/Zm00001d031178/Zm00001d050090	-/-/-/-/-	5
BP	GO:1901658	glycosyl compound catabolic process	5/3483	25/22306	0.350171	0.724258	Zm00001d005343/Zm00001d005431/Zm00001d005459/Zm00001d019279/Zm00001d031958	-/-/cytidine deaminase2/cytidine deaminase1/-	5
BP	GO:2000060	positive regulation of ubiquitin-dependent protein catabolic process	5/3483	25/22306	0.350171	0.724258	Zm00001d003207/Zm00001d025750/Zm00001d028285/Zm00001d031178/Zm00001d050090	-/-/-/-/-	5
BP	GO:0006364	rRNA processing	57/3483	346/22306	0.350711	0.724258	Zm00001d000432/Zm00001d002735/Zm00001d005023/Zm00001d005089/Zm00001d005972/Zm00001d006361/Zm00001d006497/Zm00001d009597/Zm00001d012195/Zm00001d012886/Zm00001d013626/Zm00001d014626/Zm00001d016286/Zm00001d016595/Zm00001d017242/Zm00001d017469/Zm00001d017887/Zm00001d017967/Zm00001d017982/Zm00001d018022/Zm00001d019449/Zm00001d021061/Zm00001d021621/Zm00001d026195/Zm00001d026254/Zm00001d027487/Zm00001d0…	-/-/-/-/-/-/-/-/-/-/-/-/-/-/-/-/-/-/-/-/-/-/-/-/-/-/-/-/-/-/-/-/-/-/-/-/-/-/-/ribosome export associated1/-/-/-/-/-/-/-/-/-/-/-/-/-/-/-/-/-	57
BP	GO:0008299	isoprenoid biosynthetic process	26/3483	153/22306	0.351405	0.724258	Zm00001d002349/Zm00001d010274/Zm00001d010607/Zm00001d012197/Zm00001d012212/Zm00001d012312/Zm00001d014367/Zm00001d015053/Zm00001d017139/Zm00001d018488/Zm00001d025545/Zm00001d026064/Zm00001d027271/Zm00001d027936/Zm00001d028024/Zm00001d028094/Zm00001d028152/Zm00001d033222/Zm00001d033945/Zm00001d034387/Zm00001d039142/Zm00001d039634/Zm00001d045159/Zm00001d047906/Zm00001d051458/Zm00001d053889	kaurene synthase3/isopentenyl pyrophosphate isomerase2/-/diphosphocytidyl methyl erythritol synthase2/gibberellin 20-oxidase5/-/-/terpene synthase2/hydroxymethylbutenyl diphosphate synthase1/cytochrome P450 13/zeaxanthin epoxidase2/-/-/viviparous5/-/-/-/viviparous14/C2C2-GATA-transcription factor 34/aldehyde oxidase1/-/dwarf plant1/-/-/methyl erythritol cyclodiphosphate synthase1/cycloartenol syn…	26
BP	GO:0006265	DNA topological change	6/3483	31/22306	0.353132	0.724258	Zm00001d007904/Zm00001d018859/Zm00001d021015/Zm00001d023640/Zm00001d027801/Zm00001d036531	-/-/-/-/-/-	6
BP	GO:0006376	mRNA splice site selection	6/3483	31/22306	0.353132	0.724258	Zm00001d005406/Zm00001d011652/Zm00001d019579/Zm00001d022243/Zm00001d028034/Zm00001d043745	-/-/-/-/-/-	6
BP	GO:0009218	pyrimidine ribonucleotide metabolic process	6/3483	31/22306	0.353132	0.724258	Zm00001d011855/Zm00001d014912/Zm00001d023833/Zm00001d037208/Zm00001d041620/Zm00001d042005	-/protein disulfide isomerase4/-/-/-/-	6
BP	GO:0009220	pyrimidine ribonucleotide biosynthetic process	6/3483	31/22306	0.353132	0.724258	Zm00001d011855/Zm00001d014912/Zm00001d023833/Zm00001d037208/Zm00001d041620/Zm00001d042005	-/protein disulfide isomerase4/-/-/-/-	6
BP	GO:0019856	pyrimidine nucleobase biosynthetic process	6/3483	31/22306	0.353132	0.724258	Zm00001d011855/Zm00001d017790/Zm00001d021844/Zm00001d028330/Zm00001d037208/Zm00001d041620	-/-/-/-/-/-	6
BP	GO:0046131	pyrimidine ribonucleoside metabolic process	6/3483	31/22306	0.353132	0.724258	Zm00001d011855/Zm00001d014912/Zm00001d023833/Zm00001d037208/Zm00001d041620/Zm00001d042005	-/protein disulfide isomerase4/-/-/-/-	6
BP	GO:0006898	receptor-mediated endocytosis	10/3483	55/22306	0.353299	0.724258	Zm00001d007692/Zm00001d009452/Zm00001d014368/Zm00001d023218/Zm00001d027333/Zm00001d037484/Zm00001d038892/Zm00001d041647/Zm00001d048511/Zm00001d052308	-/-/-/-/-/-/-/-/-/-	10
BP	GO:0006270	DNA replication initiation	9/3483	49/22306	0.354174	0.724258	Zm00001d002056/Zm00001d010567/Zm00001d023801/Zm00001d042713/Zm00001d042810/Zm00001d043840/Zm00001d045080/Zm00001d045354/Zm00001d049190	-/-/-/-/-/origin recognition complex4/origin recognition complex1/-/minichromosome maintenance7	9
BP	GO:0043647	inositol phosphate metabolic process	7/3483	37/22306	0.354385	0.724258	Zm00001d001974/Zm00001d026514/Zm00001d033110/Zm00001d033551/Zm00001d033927/Zm00001d037110/Zm00001d037731	-/-/-/-/-/-/-	7
BP	GO:1903830	magnesium ion transmembrane transport	7/3483	37/22306	0.354385	0.724258	Zm00001d002946/Zm00001d007307/Zm00001d010198/Zm00001d013153/Zm00001d042441/Zm00001d042621/Zm00001d047388	-/-/-/-/magnesium transporter9/-/magnesium transporter4	7
BP	GO:2001020	regulation of response to DNA damage stimulus	7/3483	37/22306	0.354385	0.724258	Zm00001d013757/Zm00001d018057/Zm00001d036531/Zm00001d041083/Zm00001d042302/Zm00001d044358/Zm00001d053680	-/-/-/-/-/-/-	7
BP	GO:0009081	branched-chain amino acid metabolic process	8/3483	43/22306	0.354609	0.724258	Zm00001d007892/Zm00001d013223/Zm00001d019054/Zm00001d029848/Zm00001d032455/Zm00001d044035/Zm00001d050133/Zm00001d052444	-/-/-/-/-/-/-/-	8
BP	GO:0009163	nucleoside biosynthetic process	8/3483	43/22306	0.354609	0.724258	Zm00001d011855/Zm00001d014912/Zm00001d023833/Zm00001d034320/Zm00001d037208/Zm00001d041620/Zm00001d042005/Zm00001d053984	-/protein disulfide isomerase4/-/-/-/-/-/-	8
BP	GO:0042455	ribonucleoside biosynthetic process	8/3483	43/22306	0.354609	0.724258	Zm00001d011855/Zm00001d014912/Zm00001d023833/Zm00001d034320/Zm00001d037208/Zm00001d041620/Zm00001d042005/Zm00001d053984	-/protein disulfide isomerase4/-/-/-/-/-/-	8
BP	GO:0000724	double-strand break repair via homologous recombination	18/3483	104/22306	0.35632	0.727066	Zm00001d002154/Zm00001d007227/Zm00001d007943/Zm00001d008259/Zm00001d010567/Zm00001d018287/Zm00001d018657/Zm00001d020001/Zm00001d021122/Zm00001d024953/Zm00001d034859/Zm00001d036531/Zm00001d040389/Zm00001d041083/Zm00001d042640/Zm00001d044358/Zm00001d049190/Zm00001d053917	meiotic recombination protein 11 homolog A/-/-/-/-/-/-/-/-/-/-/-/-/-/-/-/minichromosome maintenance7/-	18
BP	GO:0006887	exocytosis	22/3483	129/22306	0.361486	0.736915	Zm00001d001765/Zm00001d004159/Zm00001d007760/Zm00001d013049/Zm00001d015890/Zm00001d018060/Zm00001d019091/Zm00001d019104/Zm00001d021828/Zm00001d022502/Zm00001d022584/Zm00001d024205/Zm00001d025398/Zm00001d027808/Zm00001d031942/Zm00001d033303/Zm00001d034505/Zm00001d039196/Zm00001d041138/Zm00001d042331/Zm00001d048902/Zm00001d049522	-/-/-/-/-/-/-/-/-/-/-/-/-/-/-/roothair defective1/-/-/-/-/-/-	22
BP	GO:0009063	cellular amino acid catabolic process	14/3483	80/22306	0.365949	0.743149	Zm00001d007892/Zm00001d015599/Zm00001d019054/Zm00001d019698/Zm00001d023437/Zm00001d031749/Zm00001d032455/Zm00001d033228/Zm00001d036888/Zm00001d038841/Zm00001d042661/Zm00001d047124/Zm00001d052444/Zm00001d053776	-/-/-/-/glycine decarboxylase1/-/-/-/-/putative aldehyde dehydrogenase MIS1/-/-/-/-	14
BP	GO:0072528	pyrimidine-containing compound biosynthetic process	13/3483	74/22306	0.368385	0.743149	Zm00001d007318/Zm00001d011183/Zm00001d011855/Zm00001d014912/Zm00001d015484/Zm00001d017790/Zm00001d021844/Zm00001d023833/Zm00001d028330/Zm00001d033383/Zm00001d037208/Zm00001d041620/Zm00001d042005	-/thiamine biosynthesis1/-/protein disulfide isomerase4/-/-/-/-/-/hydroxymethylpyrimidine phosphate synthase1/-/-/-	13
BP	GO:0044772	mitotic cell cycle phase transition	24/3483	142/22306	0.370172	0.743149	Zm00001d002154/Zm00001d002662/Zm00001d004709/Zm00001d007407/Zm00001d007585/Zm00001d010656/Zm00001d012560/Zm00001d018057/Zm00001d023279/Zm00001d028143/Zm00001d031678/Zm00001d033365/Zm00001d037979/Zm00001d037981/Zm00001d040381/Zm00001d042639/Zm00001d042810/Zm00001d044630/Zm00001d045080/Zm00001d047873/Zm00001d048127/Zm00001d052185/Zm00001d052695/Zm00001d053930	meiotic recombination protein 11 homolog A/cyclin8/-/related to retinoblastoma1/-/cyclin1/cyclin7/-/-/-/retinoblastoma family3/-/-/-/-/-/-/-/origin recognition complex1/-/-/-/-/-	24
[truncated: 2,426 more rows]

## Sheet: AS1-Go terms on up-regulated 
Category	GOID	Description	GeneRatio	BgRatio	pvalue	padj	geneID	geneName	Count
BP	GO:0015074	DNA integration	7/763	30/22306	5.45301e-05	0.0850669	Zm00001d032798/Zm00001d005269/Zm00001d044186/Zm00001d021241/Zm00001d013534/Zm00001d043835/Zm00001d023523	-/-/-/-/-/-/TUB-transcription factor 14	7
[truncated: 2,488 more rows]

## Sheet: OE3-Go terms on Down-regulated 
Category	GOID	Description	GeneRatio	BgRatio	pvalue	padj	geneID	geneName	Count
[truncated: 2,871 more rows]

## Sheet: OE3-Go terms on up-regulated 
Category	GOID	Description	GeneRatio	BgRatio	pvalue	padj	geneID	geneName	Count
[truncated: 3,433 more rows]
